# Supplementary material for: Acyl-oxyallenes as α,β-unsaturated ketone surrogates for Giese radical addition
Source: Royal Society of Chemistry journal article supplement (doi:10.1039/d5sc08002a), 2025-11-25
Supplement: d5sc08002a1.pdf [file d5sc08002a1.pdf]

Supporting Information

**Acyl-oxyallenes as  $\alpha, \beta$ -Unsaturated Ketone Surrogates for Giese Radical Addition**

Jiarong Jin<sup>a</sup>, Xin Li<sup>a</sup>, Yicheng Luo<sup>a</sup>, Jianfu Chen<sup>c,\*</sup>, Wenjun Tang<sup>a,b,\*</sup>, Kang Du<sup>a,\*</sup>

<sup>a</sup>School of Chemistry and Material Sciences, Hangzhou Institute for Advanced Study, University of Chinese Academy of Sciences, Hangzhou 310024, China.

<sup>b</sup>State key Laboratory of Chemical Biology, Shanghai Institute of Organic Chemistry, Chinese Academy of Sciences, Shanghai 200032, China.

<sup>c</sup>State Key Laboratory of Green Chemical Engineering and Industrial Catalysis, Key Laboratory for Advanced Materials, Centre for Computational Chemistry and Research Institute of Industrial Catalysis, East China University of Science and Technology, 130 Meilong Road, Shanghai 200237, China

*jfchen@ecust.edu.cn*  
*tangwenjun@sioc.ac.cn*  
*kangdu@ucas.ac.cn*

Contents

|                                                                                     |      |
|-------------------------------------------------------------------------------------|------|
| 1. Materials and Methods .....                                                      | S2   |
| 2. Optimization Studies .....                                                       | S3   |
| 3. Experimental Section.....                                                        | S6   |
| 3.1 General procedure A for the preparation of <i>N</i> -benzyl ketone Imines ..... | S6   |
| 3.2 Characterization data of <i>N</i> -benzyl ketone Imines.....                    | S6   |
| 3.3 General procedure B for the preparation of Propargyl Ester.....                 | S11  |
| 3.4 Characterization data of Propargyl ester .....                                  | S12  |
| 3.5 General procedure C for the preparation of $\gamma$ -Aminoketones.....          | S23  |
| 3.6 Characterization data of $\gamma$ -Aminoketones.....                            | S23  |
| 3.7 Synthetic Application .....                                                     | S39  |
| 3.8 Mechanism Experiment.....                                                       | S43  |
| 4. X-Ray Analysis of Compound <b>3af</b> .....                                      | S50  |
| 5. NMR Spectra .....                                                                | S57  |
| 6. References .....                                                                 | S161 |

## 1. Materials and Methods

All the reactions were carried out under inert atmosphere unless otherwise noted. All the solvents used for the reactions were dried according to standard procedures. All glassware was oven dried in oven before use. All reagents and starting materials were purchased from commercial sources and used as supplied, unless otherwise indicated. *t*-BuOK (98% pure from Sigma-Aldrich) and anhydrous dioxane (from J&K Scientific) were used in reactions. Anhydrous tetrahydrofuran (THF), acetonitrile (CH<sub>3</sub>CN), and methylene chloride (CH<sub>2</sub>Cl<sub>2</sub>) were obtained by Glass Contour Solvent Purification System. Yields refer to chromatographically and spectroscopically (<sup>1</sup>H NMR) homogeneous materials, unless otherwise stated. Flash column chromatography was performed on the Biotage® Automated Liquid Chromatography System Isolera Prime® using Santai Technologies iLOK 12-120 g silica gel cartridges and Santai Technologies SEPA FLASH 40-120 g silica gel cartridges or by using Santai Technologies™ silica gel, 60 Å (40–63 µm particle size) as stated. TLC analyses were performed on EMD TLC Silica gel 60 F<sub>254</sub> Glass Plates and the spots were visualized by UV-light (254 nm) or an aqueous solution of phosphomolybdic acid, ceric sulfate, and KMnO<sub>4</sub>. <sup>1</sup>H NMR spectra were recorded on a Bruker Ultra Shield Plus Avance III 500 MHz or a Bruker Ultra Shield Plus Avance III 400 MHz and are internally referenced to residual protic CDCl<sub>3</sub> (7.26 ppm) with tetramethylsilane as internal standard. <sup>13</sup>C NMR spectra were recorded on a Bruker Ultra Shield Plus Avance III 400 MHz (101 MHz) and data are reported in terms of chemical shift relative to CDCl<sub>3</sub> (77.16 ppm), CD<sub>2</sub>Cl<sub>2</sub> (53.84 ppm). <sup>19</sup>F NMR spectra were recorded on a Bruker Ultra Shield Plus Avance III 400 MHz (376 MHz). High Resolution Mass Spectra were obtained on Thermo Fisher Exactive Plus Orbitrap Mass Spectrum (ESI). X-ray analysis data was collected from Crystallography Facility at Shiyanjia lab.

## 2. Optimization Studies

### *Effect of Bases:*

As shown in Table S1, 3 equivalents of K<sup>t</sup>OBu were found to be optimal base

Table S1. Optimization of Bases

| 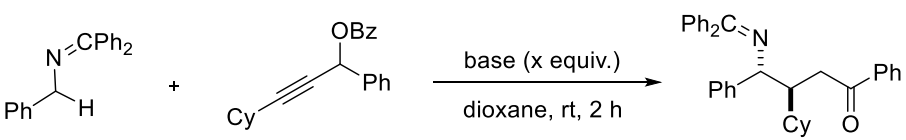 |                                             |                        |
|------------------------------------------------------------------------------------|---------------------------------------------|------------------------|
| <b>1a</b>                                                                          | <b>2a</b>                                   | <b>3aa</b>             |
| <sup>a</sup> Entry                                                                 | Base (x equiv.)                             | <sup>b</sup> Yield (%) |
| 1                                                                                  | K <sup>t</sup> OBu (2.0 equiv.)             | 66                     |
| <b>2</b>                                                                           | <b>K<sup>t</sup>OBu (3.0 equiv.)</b>        | <b>89</b>              |
| 3                                                                                  | K <sup>t</sup> OBu (4.0 equiv.)             | 76                     |
| 4                                                                                  | Li <sup>t</sup> OBu (3.0 equiv.)            | 0                      |
| 5                                                                                  | Na <sup>t</sup> OBu (3.0 equiv.)            | 20                     |
| 6                                                                                  | KOMe (3.0 equiv.)                           | 46                     |
| 7                                                                                  | NaOEt (3.0 equiv.)                          | 0                      |
| 8                                                                                  | NaOH (3.0 equiv.)                           | 0                      |
| 9                                                                                  | KOH (3.0 equiv.)                            | 0                      |
| 10                                                                                 | K <sub>2</sub> CO <sub>3</sub> (3.0 equiv.) | 0                      |
| 11                                                                                 | LiHMDS (3.0 equiv.)                         | 0                      |
| 12                                                                                 | NaHMDS (3.0 equiv.)                         | 0                      |
| 13                                                                                 | TMG (3.0 equiv.)                            | 0                      |
| 14                                                                                 | Pyridine (3.0 equiv.)                       | 0                      |
| 15                                                                                 | NEt <sub>3</sub> (3.0 equiv.)               | 0                      |

<sup>a</sup> Unless otherwise stated, the reaction was carried out under a nitrogen atmosphere at room temperature for 2 hours, using **1a** (0.1 mmol), **2a** (0.2 mmol), Base, and dioxane (1 mL). <sup>b</sup> The yield was determined by <sup>1</sup>H NMR of the crude mixture, using 1,3,5-trimethoxybenzene as an internal standard. dr was determined to be 10:1 for all the entries.

### *Effect of Ester Group:*

As shown in Table S2, Benzoyl group was found to be optimal ester group

Table S2: Optimization of Ester Group

|                    |           |                        |
|--------------------|-----------|------------------------|
|                    |           |                        |
| <b>1a</b>          | <b>2a</b> | <b>3aa</b>             |
| <sup>a</sup> Entry | -R        | <sup>b</sup> Yield (%) |
| 1                  | -Ac       | 60                     |
| 2                  | -Boc      | 52                     |
| 3                  | -Bz       | 83                     |

<sup>a</sup> Unless otherwise stated, the reaction was carried out under a nitrogen atmosphere at room temperature for 2 hours, using **1a** (0.1 mmol), **2a** (0.2 mmol), K<sup>t</sup>OBu (0.3 mmol), and dioxane (1 mL). <sup>b</sup> The yield was determined by <sup>1</sup>H NMR of the crude mixture, using 1,3,5-trimethoxybenzene as an internal standard. dr was determined to be 10:1.

### Effect of Solvents:

As shown in Table S3, dioxane were found to be optimal solvent

Table S3: Optimization of Solvents

|                    |                   |                        |
|--------------------|-------------------|------------------------|
|                    |                   |                        |
| <b>1a</b>          | <b>2a</b>         | <b>3aa</b>             |
| <sup>a</sup> Entry | Solvent           | <sup>b</sup> Yield (%) |
| 1                  | toluene           | 30                     |
| 2                  | <i>n</i> -Hexane  | 40                     |
| 3                  | MTBE              | 35                     |
| 4                  | DCM               | 28                     |
| 5                  | THF               | 38                     |
| 6                  | Et <sub>2</sub> O | 35                     |
| 7                  | Diglyme           | 18                     |
| 8                  | DMSO              | 0                      |
| 9                  | dioxane           | 83                     |

<sup>a</sup> Unless otherwise stated, the reaction was carried out under a nitrogen atmosphere at room temperature for 2 hours, using **1a** (0.1 mmol), **2a** (0.2 mmol), K<sup>t</sup>OBu (0.3 mmol), and solvent (1 mL). <sup>b</sup> The yield was determined by <sup>1</sup>H NMR of the crude mixture, using 1,3,5-trimethoxybenzene as an internal standard. dr was determined to be 10:1 for all entries.

### Effect of Other Conditions:



Table S4: Optimization of Other Conditions

| 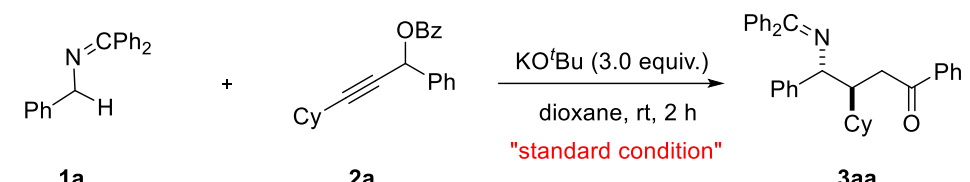 |                                           |                        |
|------------------------------------------------------------------------------------|-------------------------------------------|------------------------|
| <b>1a</b>                                                                          | <b>2a</b>                                 | <b>3aa</b>             |
| <sup>a</sup> Entry                                                                 | Deviation from the standard conditions    | <sup>b</sup> Yield (%) |
| 1                                                                                  | none                                      | 89                     |
| 2                                                                                  | 2 equiv. <b>1a</b> and 1 equiv. <b>2a</b> | 71                     |
| 3                                                                                  | 0.5 M vs 0.1M                             | 55                     |
| 4                                                                                  | 0.2 M vs 0.1 M                            | 79                     |
| 5                                                                                  | 0.05 M vs 0.1 M                           | 82                     |
| 6                                                                                  | air instead of N <sub>2</sub> atmosphere  | 32                     |
| 7                                                                                  | TBAB as additive                          | 79                     |
| 8                                                                                  | 18-crown-6 as additive                    | 52                     |
| 9                                                                                  | 0 °C                                      | 50                     |
| 10                                                                                 | 50 °C                                     | 55                     |
| 11                                                                                 | 80 °C                                     | 0                      |
| 12                                                                                 | dark condition                            | 75                     |

<sup>a</sup> Unless otherwise stated, the reaction was carried out under a nitrogen atmosphere at room temperature for 2 hours, using **1a** (0.1 mmol), **2a** (0.2 mmol), K<sup>t</sup>OBu (0.3 mmol), and dioxane (1 mL). <sup>b</sup> The yield was determined by <sup>1</sup>H NMR, using 1,3,5-trimethoxybenzene as an internal standard. dr was determined to be 10:1 for all entries.

### 3. Experimental Section

The following substrates were reported compounds and were prepared according to the following procedures.

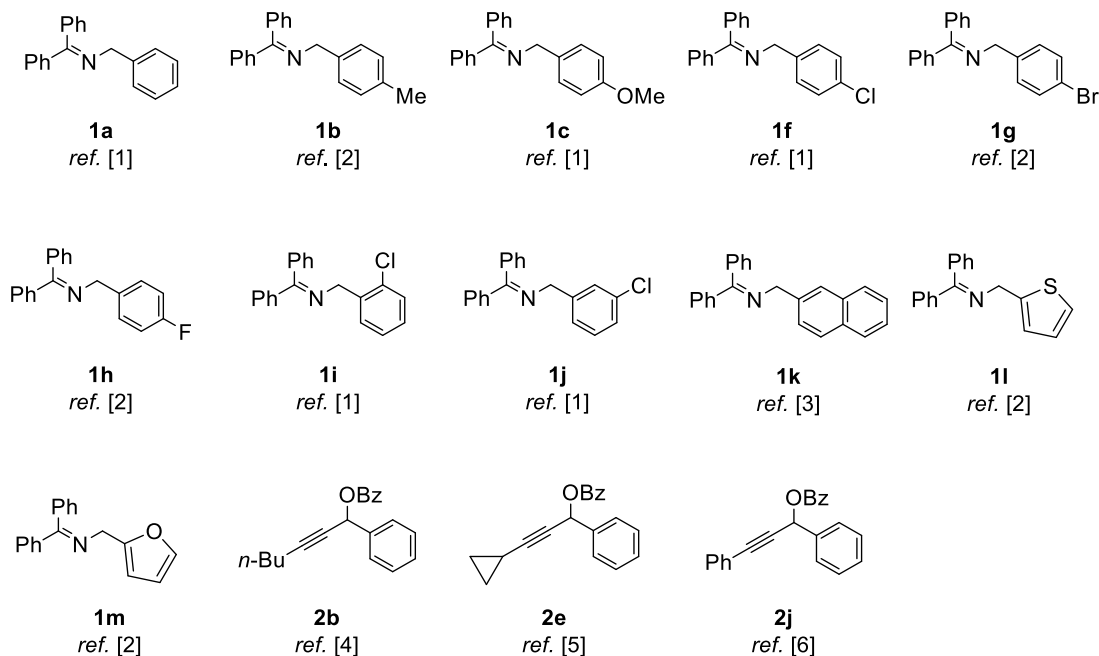

#### 3.1 General procedure A for the preparation of *N*-benzyl ketone Imines

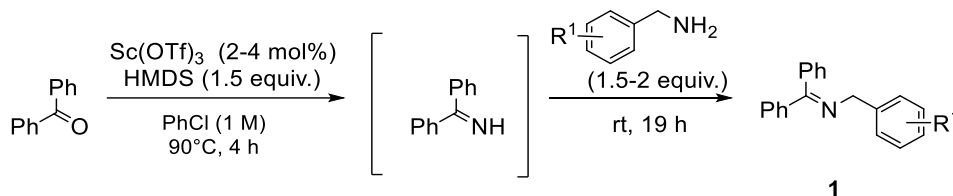

In a nitrogen-filled glove box, to an oven dried Schlenk tube with a magnetic stir bar was added benzophenone (1.0 equiv.),  $\text{Sc}(\text{OTf})_3$  (0.02-0.04 equiv.) and hexamethyldisilazane (1.5 equiv.) and dry chlorobenzene (1.0 M for benzophenone). The Schlenk tube was capped, removed from glove box, and stirred at 90 °C for 4h. The resulting reaction solution was cooled to room temperature, benzyl amine (1.5-2.0 equiv.) was then added. The reaction solution was stirred at room temperature for another 19h, then concentrated *in vacuo*. Purification of the crude by silica gel column chromatography afforded the title compounds **1a-1m**.

#### 3.2 Characterization data of *N*-benzyl ketone Imines

##### *N*-benzyl-1,1-diphenylmethanimine (**1a**)

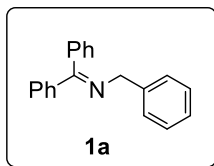

The preparation of **1a** was followed according to General Procedure A from benzophenone (4.0 g, 22.0 mmol, 1.0 equiv.), Sc(OTf)<sub>3</sub> (230.0 mg, 0.4 mmol, 0.02 equiv.), HMDS (5.3 g, 33.0 mmol, 1.5 equiv.) and benzylamine (3.5 g, 33.0 mmol, 1.5 equiv.). Purification by silica gel column chromatography with eluent (10% triethylamine in petroleum ether) afforded the title compound **1a** as a white solid (5.8 g, 97% yield).

Spectral data for **1a**: <sup>1</sup>H NMR (400 MHz, CDCl<sub>3</sub>) δ 7.69 (d, *J* = 6.8 Hz, 2H), 7.52 – 7.42 (m, 3H), 7.41 – 7.28 (m, 7H), 7.25 – 7.19 (m, 3H), 4.61 (s, 2H). This characterization data matches with the previously reported data.

#### ***N*-(4-methylbenzyl)-1,1-diphenylmethanimine (1b)**

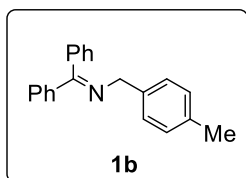

The preparation of **1b** was followed according to General Procedure A from benzophenone (0.5 g, 2.8 mmol, 1.0 equiv.), Sc(OTf)<sub>3</sub> (27.0 mg, 0.06 mmol, 0.02 equiv.), HMDS (678 mg, 4.2 mmol, 1.5 equiv.) and 4-methylbenzylamine (0.51 g, 4.2 mmol, 1.5 equiv.). Purification by silica gel column chromatography with eluent (30% triethylamine in petroleum ether) afforded the title compound **1b** as a white solid (542 mg, 70% yield).

Spectral data for **1b**: <sup>1</sup>H NMR (400 MHz, CDCl<sub>3</sub>) δ 7.68 (d, *J* = 6.8 Hz, 2H), 7.51 – 7.42 (m, 3H), 7.41 – 7.28 (m, 3H), 7.25 – 7.17 (m, 4H), 7.13 (d, *J* = 7.8 Hz, 2H), 4.58 (s, 2H), 2.34 (s, 3H); <sup>13</sup>C NMR (101 MHz, CDCl<sub>3</sub>) δ 168.7, 140.0, 137.7, 136.9, 136.1, 130.1, 129.1, 128.7, 128.6, 128.2, 127.9, 127.7, 57.4, 21.2. This characterization data matches with the previously reported data.

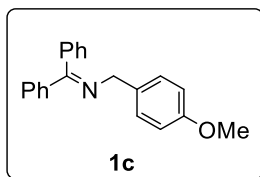

#### ***N*-(4-methoxybenzyl)-1,1-diphenylmethanimine (1c)**

The preparation of **1c** was followed according to General Procedure A from benzophenone (0.5 g, 2.8 mmol, 1.0 equiv.), Sc(OTf)<sub>3</sub> (27.0 mg, 0.06 mmol, 0.02 equiv.), HMDS (678 mg, 4.2 mmol, 1.5 equiv.) and 4-methoxybenzylamine (0.58 g, 4.2 mmol, 1.5 equiv.). Purification by silica gel column chromatography with eluent (10% triethylamine in petroleum ether) afforded the title compound **1c** as a white solid (815 mg, 70% yield).

Spectral data for **1c**: <sup>1</sup>H NMR (400 MHz, CDCl<sub>3</sub>) δ 7.67 (d, *J* = 6.8 Hz, 2H), 7.52 – 7.40 (m, 3H), 7.40 – 7.30 (m, 3H), 7.26 – 7.18 (m, 4H), 6.87 (d, *J* = 8.7 Hz, 2H), 4.55 (s, 2H), 3.80 (s, 3H); <sup>13</sup>C NMR (101 MHz, CDCl<sub>3</sub>) δ 168.6, 158.5, 140.0, 136.9, 132.9, 130.1, 128.9, 128.68, 128.66, 128.6, 128.2, 127.9, 113.9, 57.0, 55.4. This characterization data matches with the previously reported data.

### *N*-(4-(methylthio)benzyl)-1,1-diphenylmethanimine (**1d**)

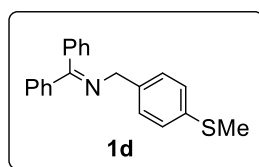

The preparation of **1d** was followed according to General Procedure A from benzophenone (0.5 g, 2.8 mmol, 1.0 equiv.), Sc(OTf)<sub>3</sub> (54.0 mg, 0.1 mmol, 0.04 equiv.), HMDS (678 mg, 4.2 mmol, 1.5 equiv.) and 4-methylthiobenzylamine (0.86 g, 5.6 mmol, 2.0 equiv.).

Purification by silica gel column chromatography with eluent (5% triethylamine in petroleum ether) afforded the title compound **1d** as a white solid (565 mg, 65% yield).

Spectral data for **1d**: <sup>1</sup>H NMR (400 MHz, CDCl<sub>3</sub>) δ 7.72 (d, *J* = 8.4 Hz, 2H), 7.55 – 7.46 (m, 3H), 7.44 – 7.34 (m, 3H), 7.33 – 7.25 (m, 4H), 7.24 (d, *J* = 5.7 Hz, 2H), 4.60 (s, 2H), 2.51 (s, 3H); <sup>13</sup>C NMR (101 MHz, CDCl<sub>3</sub>) δ 169.0, 139.8, 137.9, 136.7, 136.2, 130.2, 128.7, 128.7, 128.6, 128.3, 128.2, 127.9, 127.1, 57.1, 16.4; IR (ATR): 3021, 2867, 1629, 1492, 1437, 1422, 1285, 1091, 1029, 809, 696 cm<sup>-1</sup>; HRMS (ESI) calculated for C<sub>21</sub>H<sub>20</sub>NS<sup>+</sup> [M+H<sup>+</sup>]: 318.1311, found: 318.1306.

### *N*-(4-phenoxybenzyl)-1,1-diphenylmethanimine (**1e**)

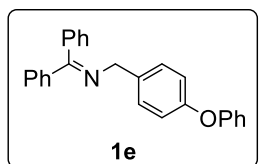

The preparation of **1e** was followed according to General Procedure A from benzophenone (0.5 g, 2.8 mmol, 1.0 equiv.), Sc(OTf)<sub>3</sub> (54.0 mg, 0.1 mmol, 0.04 equiv.), HMDS (678 mg, 4.2 mmol, 1.5 equiv.) and 4-phenoxybenzylamine (1.1 g, 5.6 mmol, 2.0 equiv.). Purification by

silica gel column chromatography with eluent (5% triethylamine in petroleum ether) afforded the title compound **1e** as a white solid (983 mg, 99%).

Spectral data for **1e**: <sup>1</sup>H NMR (400 MHz, CDCl<sub>3</sub>) δ 7.71 (d, *J* = 6.8 Hz, 2H), 7.55 – 7.43 (m, 3H), 7.41 (d, *J* = 7.0 Hz, 1H), 7.39 – 7.30 (m, 6H), 7.24 (dd, *J* = 7.7, 1.8 Hz, 2H), 7.10 (t, *J* = 7.4 Hz, 1H), 7.02 (dd, *J* = 8.0, 5.7 Hz, 4H), 4.61 (s, 2H); <sup>13</sup>C NMR (101 MHz, CDCl<sub>3</sub>) δ 168.9, 157.7, 155.8, 139.8, 136.8, 135.8, 130.2, 129.8, 129.1, 128.72, 128.67, 128.65, 128.2, 127.9, 123.0, 119.2, 118.6, 57.0; IR (ATR): 3056, 2874, 1621, 1589, 1487, 1442, 1232, 1200, 1165, 869, 763 cm<sup>-1</sup>; HRMS (ESI) calculated for C<sub>26</sub>H<sub>22</sub>NO<sup>+</sup> [M+H<sup>+</sup>]: 364.1696, found: 364.1691.

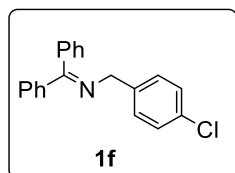

### *N*-(4-chlorobenzyl)-1,1-diphenylmethanimine (**1f**)

The preparation of **1f** was followed according to General Procedure A from benzophenone (0.5 g, 2.8 mmol, 1.0 equiv.), Sc(OTf)<sub>3</sub> (27.0 mg, 0.06 mmol, 0.02 equiv.), HMDS (678 mg, 4.2 mmol, 1.5 equiv.) and 4-chlorobenzylamine (0.59 g, 4.2 mmol, 1.5 equiv.). Purification by silica

gel column chromatography with eluent (10% triethylamine in petroleum ether) afforded the title compound **1f** as a white solid (645 mg, 77%).

Spectral data for **1f**:  $^1\text{H NMR}$  (400 MHz,  $\text{CDCl}_3$ )  $\delta$  7.68 (d,  $J$  = 6.9 Hz, 2H), 7.51 – 7.44 (m, 3H), 7.44 – 7.29 (m, 4H), 7.28 (d,  $J$  = 2.9 Hz, 3H), 7.19 (dd,  $J$  = 7.6, 1.9 Hz, 2H), 4.56 (s, 2H);  $^{13}\text{C NMR}$  (101 MHz,  $\text{CDCl}_3$ )  $\delta$  169.4, 139.7, 139.3, 136.7, 132.3, 130.3, 129.1, 128.8, 128.7, 128.5, 128.2, 127.8, 56.8. This characterization data matches with the previously reported data.

#### *N*-(4-bromobenzyl)-1,1-diphenylmethanimine (**1g**)

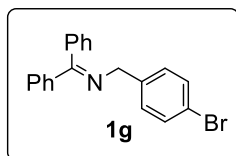

The preparation of **1g** was followed according to General Procedure A from benzophenone (0.5 g, 2.8 mmol, 1.0 equiv.),  $\text{Sc}(\text{OTf})_3$  (30.0 mg, 0.06 mmol, 0.02 equiv.), HMDS (678 mg, 4.2 mmol, 1.5 equiv.) and 4-bromobenzylamine (0.78 g, 4.2 mmol, 1.5 equiv.). Purification by silica gel column chromatography with eluent (10% triethylamine in petroleum ether) afforded the title compound **1g** as a white solid (955 mg, 99%).

Spectral data for **1g**:  $^1\text{H NMR}$  (400 MHz,  $\text{CDCl}_3$ )  $\delta$  7.68 (d,  $J$  = 6.9 Hz, 2H), 7.52 – 7.42 (m, 5H), 7.41 – 7.32 (m, 3H), 7.25 – 7.15 (m, 4H), 4.54 (s, 2H);  $^{13}\text{C NMR}$  (101 MHz,  $\text{CDCl}_3$ )  $\delta$  169.4, 139.9, 139.7, 136.7, 131.5, 130.4, 129.5, 128.79, 128.78, 128.7, 128.3, 127.8, 120.4, 56.9. This characterization data matches with the previously reported data.

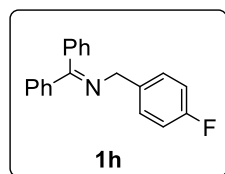

#### *N*-(4-fluorobenzyl)-1,1-diphenylmethanimine (**1h**)

The preparation of **1h** was followed according to General Procedure A from benzophenone (0.5 g, 2.8 mmol, 1.0 equiv.),  $\text{Sc}(\text{OTf})_3$  (30.0 mg, 0.06 mmol, 0.02 equiv.), HMDS (678 mg, 4.2 mmol, 1.5 equiv.) and 4-fluorobenzylamine (526 mg, 4.2 mmol, 1.5 equiv.). Purification by silica gel column chromatography with eluent (10% triethylamine in petroleum ether) afforded the title compound **1h** as a white solid (853 mg, 99%).

Spectral data for **1h**:  $^1\text{H NMR}$  (400 MHz,  $\text{CDCl}_3$ )  $\delta$  7.67 (d,  $J$  = 6.9 Hz, 2H), 7.53 – 7.43 (m, 3H), 7.43 – 7.26 (m, 5H), 7.20 (dd,  $J$  = 7.7, 1.7 Hz, 2H), 7.01 (t,  $J$  = 8.7 Hz, 2H), 4.56 (s, 2H);  $^{13}\text{C NMR}$  (101 MHz,  $\text{CDCl}_3$ )  $\delta$  169.1, 161.8 (d,  $J$  = 244.1 Hz), 139.8, 136.7, 136.5 (d,  $J$  = 3.1 Hz), 130.3, 129.2 (d,  $J$  = 7.8 Hz), 128.8, 128.7, 128.6, 128.2, 127.8, 115.2 (d,  $J$  = 21.2 Hz), 56.8;  $^{19}\text{F NMR}$  (375 MHz,  $\text{CDCl}_3$ )  $\delta$  116.7. This characterization data matches with the previously reported data.

#### *N*-(2-chlorobenzyl)-1,1-diphenylmethanimine (**1i**)

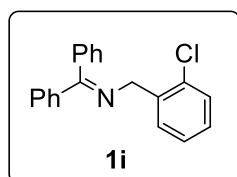

The preparation of **1i** was followed according to General Procedure A from benzophenone (0.5 g, 2.8 mmol, 1.0 equiv.),  $\text{Sc}(\text{OTf})_3$  (54.0 mg, 0.1 mmol, 0.04 equiv.), HMDS (678 mg, 4.2 mmol, 1.5 equiv.) and 2-chlorobenzylamine (793 mg, 5.6 mmol, 2.0 equiv.). Purification by

silica gel column chromatography with eluent (10% triethylamine in petroleum ether) afforded the title compound **1i** as a white solid (816 mg, 97%).

Spectral data for **1i**:  $^1\text{H NMR}$  (400 MHz,  $\text{CDCl}_3$ )  $\delta$  7.71 (d,  $J = 8.0$  Hz, 2H), 7.56 (d,  $J = 7.6$  Hz, 1H), 7.53 – 7.42 (m, 3H), 7.44 – 7.27 (m, 5H), 7.25 – 7.15 (m, 3H), 4.67 (s, 2H);  $^{13}\text{C NMR}$  (101 MHz,  $\text{CDCl}_3$ )  $\delta$  169.9, 139.9, 138.5, 136.6, 133.2, 130.3, 129.4, 129.2, 128.81, 128.76, 128.7, 128.3, 127.9, 127.8, 126.9, 55.0. This characterization data matches with the previously reported data.

#### ***N*-(3-chlorobenzyl)-1,1-diphenylmethanimine (**1j**)**

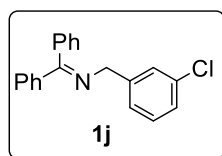

The preparation of **1j** was followed according to General Procedure A from benzophenone (0.5 g, 2.8 mmol, 1.0 equiv.),  $\text{Sc}(\text{OTf})_3$  (54.0 mg, 0.1 mmol, 0.04 equiv.), HMDS (678 mg, 4.2 mmol, 1.5 equiv.) and 3-chlorobenzamine (793 mg, 5.6 mmol, 2.0 equiv.). Purification by silica gel column chromatography with eluent (5% ethyl acetate in petroleum ether with 0.5% triethylamine) afforded the title compound **1j** as a white solid (774 mg, 92%).

Spectral data for **1j**:  $^1\text{H NMR}$  (400 MHz,  $\text{CDCl}_3$ )  $\delta$  7.71 (d,  $J = 8.0$  Hz, 2H), 7.56 (d,  $J = 7.6$  Hz, 1H), 7.53 – 7.42 (m, 3H), 7.44 – 7.27 (m, 5H), 7.25 – 7.15 (m, 3H), 4.67 (s, 2H);  $^{13}\text{C NMR}$  (101 MHz,  $\text{CDCl}_3$ )  $\delta$  169.6, 142.9, 139.7, 136.7, 134.4, 130.4, 129.7, 128.80, 128.79, 128.7, 128.3, 127.9, 127.8, 126.8, 125.9, 56.9. This characterization data matches with the previously reported data.

#### ***N*-(naphthalen-2-ylmethyl)-1,1-diphenylmethanimine (**1k**)**

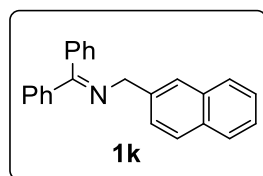

The preparation of **1k** was followed according to General Procedure A from benzophenone (0.5 g, 2.8 mmol, 1.0 equiv.),  $\text{Sc}(\text{OTf})_3$  (54.0 mg, 0.1 mmol, 0.04 equiv.), HMDS (678 mg, 4.2 mmol, 1.5 equiv.) and 1-(2-naphthyl) methylamine (880 mg, 5.6 mmol, 2.0 equiv.). Purification by silica gel column chromatography with eluent (10% triethylamine in petroleum ether) afforded the title compound **1k** as a white solid (863 mg, 97%).

Spectral data for **1k**:  $^1\text{H NMR}$  (400 MHz,  $\text{CDCl}_3$ )  $\delta$  7.81 (d,  $J = 8.3$  Hz, 3H), 7.79 – 7.67 (m, 3H), 7.56 – 7.41 (m, 6H), 7.37 (q,  $J = 6.7, 6.3$  Hz, 3H), 7.26 – 7.20 (m, 2H), 4.78 (s, 2H);  $^{13}\text{C NMR}$  (101 MHz,  $\text{CDCl}_3$ )  $\delta$  169.3, 140.0, 138.4, 136.9, 133.7, 132.6, 130.3, 128.8, 128.7, 128.2, 128.03, 127.95, 127.9, 127.8, 126.5, 126.0, 125.9, 125.5, 57.8. This characterization data matches with the previously reported data.

#### **1,1-diphenyl-*N*-(thiophen-3-ylmethyl)methanimine (**1l**)**

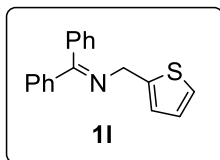

The preparation of **1l** was followed according to General Procedure A from benzophenone (0.5 g, 2.8 mmol, 1.0 equiv.), Sc(OTf)<sub>3</sub> (54.0 mg, 0.1 mmol, 0.04 equiv.), HMDS (678 mg, 4.2 mmol, 1.5 equiv.) and 2-thiophenemethylamine (634 mg, 5.6 mmol, 2.0 equiv.). Purification by silica gel column chromatography with eluent 10% triethylamine in petroleum ether) afforded the title compound **1l** as a white solid (416 mg, 55%).

Spectral data for **1l**: <sup>1</sup>H NMR (400 MHz, CDCl<sub>3</sub>) δ 7.60 (d, *J* = 8.7 Hz, 2H), 7.45 – 7.34 (m, 3H), 7.33 – 7.21 (m, 3H), 7.18 – 7.09 (m, 3H), 6.87 (dd, *J* = 5.1, 3.4 Hz, 1H), 6.79 (d, *J* = 3.4 Hz, 1H), 4.67 (s, 2H); <sup>13</sup>C NMR (101 MHz, CDCl<sub>3</sub>) δ 169.3, 144.4, 139.6, 136.5, 130.4, 128.81, 128.78, 128.76, 128.2, 127.9, 126.8, 124.1, 123.6, 53.0. This characterization data matches with the previously reported data.

#### ***N*-(furan-2-ylmethyl)-1,1-diphenylmethanimine (1m)**

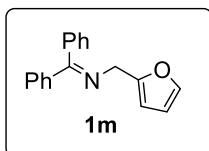

The preparation of **1m** was followed according to General Procedure A from benzophenone (0.5 g, 2.8 mmol, 1.0 equiv.), Sc(OTf)<sub>3</sub> (54.0 mg, 0.1 mmol, 0.04 equiv.), HMDS (678 mg, 4.2 mmol, 1.5 equiv.) and furan-2-ylmethanamine (543 mg, 5.6 mmol, 2.0 equiv.). Purification by silica gel column chromatography with eluent (10% triethylamine in petroleum ether) afforded the title compound **1m** as a white solid (717 mg, 99%).

Spectral data for **1m**: <sup>1</sup>H NMR (400 MHz, CDCl<sub>3</sub>) δ 7.64 (d, *J* = 7.3 Hz, 2H), 7.52 – 7.39 (m, 3H), 7.41 – 7.26 (m, 4H), 7.23 (d, *J* = 6.5 Hz, 2H), 6.39 – 6.28 (m, 1H), 6.21 (d, *J* = 3.1 Hz, 1H), 4.53 (s, 2H); <sup>13</sup>C NMR (101 MHz, CDCl<sub>3</sub>) δ 170.2, 153.9, 141.8, 139.7, 136.5, 130.3, 128.8, 128.7, 128.2, 128.0, 110.4, 106.5, 51.2. This characterization data matches with the previously reported data.

### **3.3 General procedure B for the preparation of Propargyl Ester**

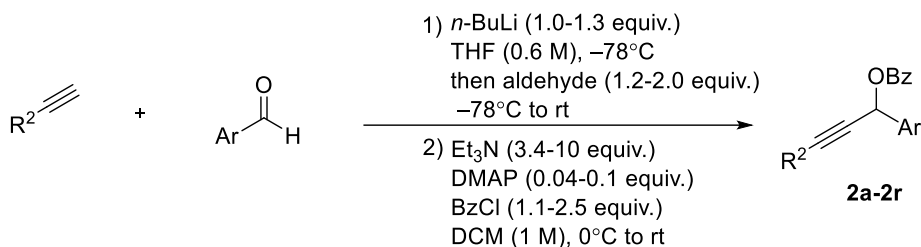

To an Oven-dried Schlenk flask equipped with a magnetic stir bar under nitrogen atmosphere was successively added with alkyne (1.0 equiv.) and THF (0.6 M for alkyne) via syringe. The

solution was cooled to -78 °C before *n*-butyllithium (2.3-2.4 M in hexane, 1.0-1.3 equiv.) was added dropwise. The resulting solution was kept stirring at -78 °C for 20 minutes, and then slowly warmed to rt and stirred for 1 hour. The resulting mixture was cooled to -78 °C, and aldehyde (1.2-1.5 equiv.) was then added. The reaction mixture was allowed to slowly warm to rt and stirred at rt until the reaction was judged to be complete by TLC analysis. The reaction was quenched with adding sat. NH<sub>4</sub>Cl (aq.) and ethyl acetate to the reaction mixture. The organic layer was separated, and the aqueous layer was extracted with ethyl acetate for twice. The combined organic layers were dried over anhydrous Na<sub>2</sub>SO<sub>4</sub>, filtered through a coarse fritted glass funnel, and the filtrate was concentrated *in vacuo*. The crude was purified through SiO<sub>2</sub> flash column chromatography or directly used for the next reaction without further purification.

To a solution of above product and DMAP (0.04-0.1 equiv.) in DCM (1.0 M) was added with Et<sub>3</sub>N (3.4-10 equiv.). The resulting mixture was cooled to 0 °C, the benzoyl chloride (1.1-2.5 equiv.) was then added, and the reaction mixture was warmed to rt and stirred overnight. The reaction was quenched with adding sat. NH<sub>4</sub>Cl (aq.) to the reaction mixture. The organic layer was separated, and the aqueous layer was extracted with DCM for two times. The combined organic layers were dried over anhydrous Na<sub>2</sub>SO<sub>4</sub>, filtered through a coarse fritted glass funnel, and the filtrate was concentrated *in vacuo*. The crude product was purified by SiO<sub>2</sub> flash column chromatography (petroleum ether: ethyl acetate) to obtain products **2a-2r**.

### 3.4 Characterization data of Propargyl ester

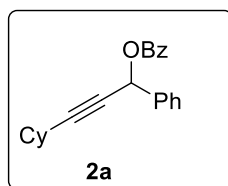

#### 3-cyclohexyl-1-phenylprop-2-yn-1-yl benzoate (**2a**)

The preparation of **2a** was followed according to General Procedure B. The propargyl alcohol was synthesized by using cyclohexylacetylene (833 mg, 7.7 mmol, 1.0 equiv.), *n*-butyllithium (2.4 M in hexane, 4.2 mL, 10.0 mmol, 1.3 equiv.), benzaldehyde (1.6 g, 15.4 mmol, 2.0 equiv.). Purification through SiO<sub>2</sub> flash column chromatography with elution (20% ethyl acetate in petroleum ether) afforded propargyl alcohol (1.2 g, 75%) as a yellow oil. Benzoylation reaction of the above propargyl alcohol with Et<sub>3</sub>N (7.6 mL, 55.0 mmol, 7.1 equiv.), DMAP (73.0 mg, 0.6 mmol, 0.07 equiv.), benzoyl chloride (1.3 mL, 11.0 mmol, 1.4 equiv.). Purification through SiO<sub>2</sub> flash column chromatography with elution (17% ethyl acetate in petroleum ether) afforded title compound **2a** as a pale-yellow oil (1.6 g, 89%).

Spectral data for **2a**: <sup>1</sup>H NMR (400 MHz, CDCl<sub>3</sub>) δ 8.08 (d, *J* = 6.8 Hz, 2H), 7.63 (d, *J* = 6.6



Hz, 2H), 7.56 (t,  $J = 7.5$  Hz, 1H), 7.47 – 7.33 (m, 5H), 6.76 (s, 1H), 2.58 – 2.42 (m, 1H), 1.87 – 1.78 (m, 2H), 1.74 – 1.66 (m, 2H), 1.57 – 1.45 (m, 3H), 1.37 – 1.26 (m, 3H);  $^{13}\text{C}$  NMR (101 MHz,  $\text{CDCl}_3$ )  $\delta$  165.65, 137.98, 133.22, 130.17, 130.01, 128.80, 128.67, 128.45, 127.87, 92.66, 76.78, 66.70, 32.5, 29.25, 25.95, 24.92; IR (ATR): 2929, 2853, 1718, 1494, 1449, 1315, 1258, 1175, 1093, 1068, 1025, 937, 903, 696, 709  $\text{cm}^{-1}$ ; HRMS (ESI) calculated for  $\text{C}_{22}\text{H}_{23}\text{O}_2^+$   $[\text{M}+\text{H}^+]$ : 319.1693, found: 319.1689.

### 1-phenylhept-2-yn-1-yl benzoate (**2b**)

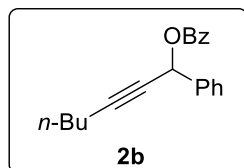

The preparation of **2b** was followed according to General Procedure B. The propargyl alcohol was synthesized by using 1-hexyne (2.0 mL, 17.4 mmol, 1.0 equiv.), *n*-butyllithium (2.3 M in hexane, 9.1 mL, 21.0 mmol, 1.2 equiv.), benzaldehyde (2.1 mL, 21.0 mmol, 1.2 equiv.), Purification through  $\text{SiO}_2$  flash column chromatography with elution (20% ethyl acetate in petroleum ether) afforded propargyl alcohol (2.2 g, 75%) as a yellow oil. Benzoylation reaction of the above propargyl alcohol with  $\text{Et}_3\text{N}$  (17.0 mL, 120.0 mmol, 6.9 equiv.), DMAP (150.0 mg, 1.2 mmol, 0.07 equiv.), benzoyl chloride (2.8 mL, 24 mmol, 1.4 equiv.). Purification through  $\text{SiO}_2$  flash column chromatography with elution (11% ethyl acetate in petroleum ether) afforded title compound **2b** as a pale-yellow oil (2.9 g, 82%).

Spectral data for **2b**:  $^1\text{H}$  NMR (400 MHz,  $\text{CDCl}_3$ )  $\delta$  8.08 (d,  $J = 8.6$  Hz, 1H), 7.62 (d,  $J = 6.6$  Hz, 2H), 7.56 (t,  $J = 7.5$  Hz, 1H), 7.47 – 7.34 (m, 6H), 6.72 (s, 1H), 2.33 – 2.24 (m, 2H), 1.58 – 1.48 (m, 2H), 1.49 – 1.35 (m, 2H), 0.91 (t,  $J = 7.2$  Hz, 3H). This characterization data matches with the previously reported data.

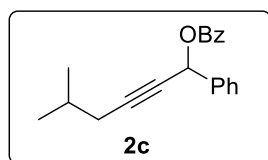

### 5-methyl-1-phenylhex-2-yn-1-yl benzoate (**2c**)

The preparation of **2c** was followed according to General Procedure B. The propargyl alcohol was synthesized by using 4-methyl-1-pentyne (1.0 g, 12.0 mmol, 1.0 equiv.), *n*-butyllithium (2.4 M in hexane, 5.5 mL, 13.2 mmol, 1.1 equiv.), benzaldehyde (2.4 mL, 18.0 mmol, 1.5 equiv.). Purification through  $\text{SiO}_2$  flash column chromatography with elution (9% ethyl acetate in petroleum ether) afforded propargyl alcohol (1.8 g, 80%) as a yellow oil. Benzoylation reaction of the above propargyl alcohol with  $\text{Et}_3\text{N}$  (12.5 mL, 90.0 mmol, 7.5 equiv.), DMAP (110.4 mg, 0.9 mmol, 0.08 equiv.), benzoyl chloride (2.6 mL, 22.5 mmol, 1.9 equiv.). Purification through  $\text{SiO}_2$  flash column chromatography with elution (11% ethyl acetate in petroleum ether) afforded title compound **2c** as a pale-yellow oil (2.1 g, 82%)

Spectral data for **2c**:  $^1\text{H}$  NMR (400 MHz,  $\text{CDCl}_3$ )  $\delta$  8.12 (d,  $J = 6.8$  Hz, 2H), 7.67 (d,  $J = 6.5$

Hz, 2H), 7.56 (t,  $J = 7.6$  Hz, 1H), 7.48 – 7.37 (m, 5H), 6.78 (s, 1H), 2.22 (dd,  $J = 6.6, 2.0$  Hz, 2H), 1.95 – 1.83 (m, 1H), 1.02 (d,  $J = 6.7$  Hz, 6H);  $^{13}\text{C}$  NMR (101 MHz,  $\text{CDCl}_3$ )  $\delta$  165.56, 137.85, 133.19, 130.03, 129.92, 128.79, 128.65, 128.41, 127.77, 87.62, 77.76, 66.69, 28.07, 28.02, 22.08; **IR (ATR)**: 2868, 2858, 1718, 1601, 1494, 1451, 1342, 1316, 1175, 1141, 1093, 1068, 1025, 936, 908, 756, 696, 709, 624, 565  $\text{cm}^{-1}$ ; **HRMS (ESI)** calculated for  $\text{C}_{20}\text{H}_{21}\text{O}_2^+$  [ $\text{M}+\text{H}^+$ ]: 293.1536, found: 293.1534.

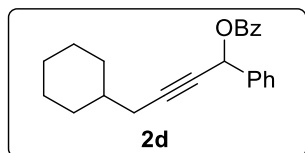

#### 4-cyclohexyl-1-phenylbut-2-yn-1-yl benzoate (**2d**)

The preparation of **2d** was followed according to General Procedure B. The propargyl alcohol was synthesized by using 3-cyclohexyl-1-propyne (1.1 mL, 9.0 mmol, 1.0 equiv.), *n*-butyllithium (2.4 M in hexane, 4.1 mL, 9.9 mmol, 1.1 equiv.), benzaldehyde (1.8 mL, 13.5 mmol, 1.5 equiv.). Purification through  $\text{SiO}_2$  flash column chromatography with elution (9% ethyl acetate in petroleum ether) afforded propargyl alcohol (1.1 g, 52%) as a yellow oil. Benzoylation reaction of the above propargyl alcohol with  $\text{Et}_3\text{N}$  (6.0 mL, 43.0 mmol, 5.0 equiv.), DMAP (52.7 mg, 0.43 mmol, 0.05 equiv.), benzoyl chloride (1.3 mL, 10.8 mmol, 1.2 equiv.). Purification through  $\text{SiO}_2$  flash column chromatography with elution (11% ethyl acetate in petroleum ether) afforded title compound **2d** as a yellow oil (1.2 g, 86%).

Spectral data for **2d**:  $^1\text{H}$  NMR (400 MHz,  $\text{CDCl}_3$ )  $\delta$  8.09 (d,  $J = 8.0$  Hz, 2H), 7.63 (d,  $J = 8.3$  Hz, 2H), 7.56 (t,  $J = 7.4$  Hz, 1H), 7.48 – 7.34 (m, 5H), 6.74 (s, 1H), 2.19 (dd,  $J = 6.7, 2.1$  Hz, 2H), 1.81 (d,  $J = 9.7$  Hz, 2H), 1.75 – 1.60 (m, 3H), 1.58 – 1.41 (m, 1H), 1.31 – 1.08 (m, 3H), 1.09 – 0.94 (m, 2H);  $^{13}\text{C}$  NMR (101 MHz,  $\text{CDCl}_3$ )  $\delta$  165.6, 137.9, 133.2, 130.1, 130.0, 128.8, 128.7, 128.5, 127.8, 87.7, 77.7, 66.8, 37.3, 32.8, 26.8, 26.4, 26.21; **IR (ATR)**: 2922, 2851, 1718, 1449, 1315, 1258, 1175, 1093, 1067, 1025, 937, 899, 757, 709, 696, 587, 571  $\text{cm}^{-1}$ ; **HRMS (ESI)** calculated for  $\text{C}_{23}\text{H}_{25}\text{O}_2^+$  [ $\text{M}+\text{H}^+$ ]: 333.1849, found: 333.1842.

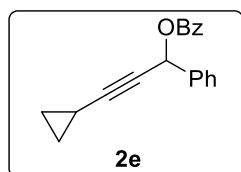

#### 3-cyclopropyl-1-phenylprop-2-yn-1-yl benzoate (**2e**)

The preparation of **2e** was followed according to General Procedure B. The propargyl alcohol was synthesized by using cyclopropylacetylene (2.0 mL, 30.0 mmol, 1.0 equiv.), *n*-butyllithium (2.3 M in hexane, 17.0 mL, 39.0 mmol, 1.3 equiv.), benzaldehyde (4.6 mL, 45.4 mmol, 1.5 equiv.). Purification through  $\text{SiO}_2$  flash column chromatography with elution (9% ethyl acetate in petroleum ether) afforded propargyl alcohol (2.3 g, 45%) as a yellow oil. Benzoylation reaction of the above propargyl alcohol with  $\text{Et}_3\text{N}$  (18.5 mL, 133.0 mmol, 4.4 equiv.), DMAP (163.2 mg, 1.3 mmol, 0.04 equiv.), benzoyl chloride (3.9 mL, 33.3 mmol, 1.1 equiv.).

Purification through SiO<sub>2</sub> flash column chromatography with elution (11% ethyl acetate in petroleum ether) afforded title compound **2e** as a yellow oil (980 mg, 27%).

Spectral data for **2e**: <sup>1</sup>H NMR (400 MHz, CDCl<sub>3</sub>) δ 8.08 (d, *J* = 8.5 Hz, 2H), 7.63 – 7.51 (m, 3H), 7.47 – 7.32 (m, 5H), 6.69 (s, 1H), 1.38 – 1.28 (m, 1H), 0.85 – 0.72 (m, 4H); <sup>13</sup>C NMR (101 MHz, CDCl<sub>3</sub>) δ 165.6, 137.9, 133.3, 130.1, 130.0, 128.8, 128.7, 128.5, 127.8, 91.7, 72.1, 66.7, 8.5, –0.2. This characterization data matches with the previously reported data.

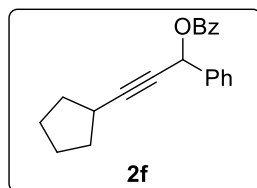

### 3-cyclopentyl-1-phenylprop-2-yn-1-yl benzoate (**2f**)

The preparation of **2f** was followed according to General Procedure B. The propargyl alcohol was synthesized by using cyclopentylacetylene (0.44 mL, 3.8 mmol, 1.0 equiv.), *n*-butyllithium (2.3 M in hexane, 1.8 mL, 4.2 mmol, 1.1 equiv.), benzaldehyde (0.4 mL, 3.8 mmol, 1.5 equiv.). Purification through SiO<sub>2</sub> flash column chromatography with elution (9% ethyl acetate in petroleum ether) afforded propargyl alcohol (0.67 g, 87%) as a yellow oil. Benzoylation reaction of the above propargyl alcohol with Et<sub>3</sub>N (4.6 mL, 33.0 mmol, 8.7 equiv.), DMAP (41.0 mg, 0.33 mmol, 0.09 equiv.), benzoyl chloride (1.0 mL, 8.3 mmol, 2.2 equiv.). Purification through SiO<sub>2</sub> flash column chromatography with elution (11% ethyl acetate in petroleum ether) afforded title compound **2f** as a yellow oil (380 mg, 38%).

Spectral data for **2f**: <sup>1</sup>H NMR (400 MHz, CDCl<sub>3</sub>) δ 8.11 (d, *J* = 8.3 Hz, 2H), 7.65 (d, *J* = 6.3 Hz, 2H), 7.56 (t, *J* = 7.5 Hz, 1H), 7.48 – 7.34 (m, 5H), 6.78 (s, 1H), 2.87 – 2.66 (m, 1H), 2.01 – 1.90 (m, 2H), 1.79 – 1.64 (m, 4H), 1.63 – 1.53 (m, 2H); <sup>13</sup>C NMR (101 MHz, CDCl<sub>3</sub>) δ 165.6, 137.9, 133.1, 130.1, 129.9, 128.7, 128.6, 128.4, 127.8, 92.8, 76.2, 66.6, 33.7, 30.2, 25.1; IR (ATR): 2967, 2963, 2237, 1717, 1699, 1494, 1450, 1398, 1315, 1249, 1093, 1079, 1025, 996, 906, 791, 696, 550 cm<sup>-1</sup>; HRMS (ESI) calculated for C<sub>21</sub>H<sub>21</sub>O<sub>2</sub><sup>+</sup> [M+H<sup>+</sup>]: 305.1536, found: 305.1536.

### 1-phenyl-3-(tetrahydro-2H-pyran-4-yl)prop-2-yn-1-yl benzoate (**2g**)

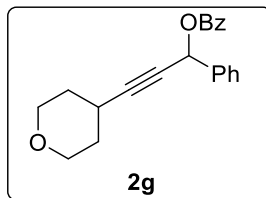

The preparation of **2g** was followed according to General Procedure B. The propargyl alcohol was synthesized by using 4-ethynyltetrahydro-2H-pyran (500 mg, 4.5 mmol, 1.0 equiv.), *n*-butyllithium (2.3 M in hexane, 2.0 mL, 4.5 mmol, 1.0 equiv.), benzaldehyde (0.6 mL, 5.9 mmol, 1.3 equiv.). Purification through SiO<sub>2</sub> flash column chromatography with elution (20% ethyl acetate in petroleum ether) afforded propargyl alcohol (1.0 g, 99%) as a yellow oil. Benzoylation reaction of the above propargyl alcohol with Et<sub>3</sub>N

(6.2 mL, 45.0 mmol, 10.0 equiv.), DMAP (56.0 mg, 0.5 mmol, 0.1 equiv.), benzoyl chloride (1.3 mL, 11.3 mmol, 2.5 equiv.). Purification through SiO<sub>2</sub> flash column chromatography with elution (10% ethyl acetate in petroleum ether) afforded title compound **2g** as a yellow oil (1.2 g, 83%).

Spectral data for **2g**: <sup>1</sup>H NMR (400 MHz, CDCl<sub>3</sub>) δ 8.08 (d, *J* = 6.9 Hz, 2H), 7.62 (d, *J* = 6.4 Hz, 2H), 7.56 (t, *J* = 7.4 Hz, 1H), 7.48 – 7.35 (m, 5H), 6.74 (s, 1H), 3.95 – 3.83 (m, 2H), 3.58 – 3.43 (m, 2H), 2.79 – 2.63 (m, 1H), 1.95 – 1.81 (m, 2H), 1.80 – 1.64 (m, 2H); <sup>13</sup>C NMR (101 MHz, CDCl<sub>3</sub>) δ 165.5, 137.6, 133.3, 129.9, 128.9, 128.7, 128.4, 127.7, 90.4, 78.0, 66.4, 66.3, 31.9, 26.3; IR (ATR): 2950, 2947, 1718, 1600, 1494, 1451, 1316, 1248, 1176, 1127, 1093, 1066, 1024, 998, 904, 765, 710, 697, 599, 586, 583 cm<sup>-1</sup>; HRMS (ESI) calculated for C<sub>21</sub>H<sub>21</sub>O<sub>3</sub><sup>+</sup> [M+H<sup>+</sup>]: 321.1485, found: 321.1482.

#### 6-((tert-butyldimethylsilyl)oxy)-1-phenylhex-2-yn-1-yl benzoate (**2h**)

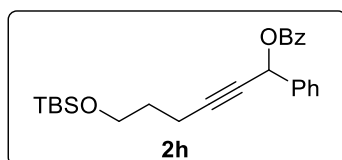

The preparation of **2h** was followed according to General Procedure B. The propargyl alcohol was synthesized by using tert-butyldimethyl(4-pentynoxy)silane (1.0 g, 6.0 mmol, 1.0 equiv.), *n*-butyllithium (2.3 M in hexane, 2.6 mL, 6.0 mmol, 1.0 equiv.), benzaldehyde (0.9 mL, 9.0 mmol, 1.5 equiv.). Purification through SiO<sub>2</sub> flash column chromatography with elution (9% ethyl acetate in petroleum ether) afforded propargyl alcohol (0.74 g, 41%) as a yellow oil. Benzoylation reaction of the above propargyl alcohol with Et<sub>3</sub>N (4.6 mL, 33.0 mmol, 5.5 equiv.), DMAP (41.0 mg, 0.33 mmol, 0.06 equiv.), benzoyl chloride (1.0 mL, 8.3 mmol, 1.4 equiv.). Purification through SiO<sub>2</sub> flash column chromatography with elution (11% ethyl acetate in petroleum ether) afforded title compound **2h** as a yellow oil (812 mg, 60%).

Spectral data for **2h**: <sup>1</sup>H NMR (400 MHz, CDCl<sub>3</sub>) δ 8.08 (d, *J* = 7.1 Hz, 2H), 7.61 (d, *J* = 6.5 Hz, 2H), 7.56 (t, *J* = 7.4 Hz, 1H), 7.48 – 7.33 (m, 5H), 6.70 (s, 1H), 3.69 (t, *J* = 6.1 Hz, 2H), 2.43 – 2.32 (m, 2H), 1.82 – 1.67 (m, 2H), 0.87 (s, 9H), 0.02 (s, 6H); <sup>13</sup>C NMR (101 MHz, CDCl<sub>3</sub>) δ 165.6, 137.8, 133.3, 130.03, 129.99, 128.9, 128.7, 128.5, 127.8, 88.2, 77.1, 66.7, 61.6, 31.5, 26.0, 18.4, 15.4, -5.3; IR (ATR): 2952, 2928, 2855, 1720, 1471, 1451, 1316, 1249, 1094, 1068, 1026, 973, 938, 834, 775, 709, 696, 663, 588 cm<sup>-1</sup>; HRMS (ESI) calculated for C<sub>25</sub>H<sub>33</sub>O<sub>3</sub>Si<sup>+</sup> [M+H<sup>+</sup>]: 409.2193, found: 409.2188.

### 6-(benzylthio)-1-phenylhex-2-yn-1-yl benzoate (**2i**)

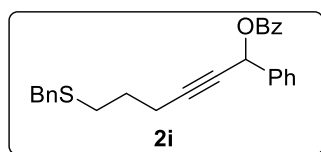

The preparation of **2i** was followed according to General Procedure B. The propargyl alcohol was synthesized by using benzyl(pent-4-yn-1-yl)sulfane (1.4 g, 7.4 mmol, 1.0 equiv.), *n*-butyllithium (2.3 M in hexane, 3.5 mL, 8.1 mmol, 1.1 equiv.), benzaldehyde (1.5 mL, 11.1 mmol, 1.5 equiv.). Purification through SiO<sub>2</sub> flash column chromatography with elution (10% ethyl acetate in petroleum ether) afforded propargyl alcohol (1.5 g, 70%) as a yellow oil. Benzoylation reaction of the above propargyl alcohol with Et<sub>3</sub>N (3.5 mL, 25.0 mmol, 3.4 equiv.), DMAP (61.0 mg, 0.5 mmol, 0.07 equiv.), benzoyl chloride (1.5 mL, 12.5 mmol, 1.7 equiv.). Purification through SiO<sub>2</sub> flash column chromatography with elution (10% ethyl acetate in petroleum ether) afforded title compound **2i** as a yellow oil (1.8 g, 90%).

Spectral data for **2i**: <sup>1</sup>H NMR (400 MHz, CDCl<sub>3</sub>) δ 8.09 (d, *J* = 6.9 Hz, 2H), 7.61 (d, *J* = 6.3 Hz, 2H), 7.56 (t, *J* = 7.6 Hz, 1H), 7.47 – 7.37 (m, 5H), 7.30 (d, *J* = 4.3 Hz, 4H), 7.28 – 7.19 (m, 1H), 6.71 (s, 1H), 3.69 (s, 2H), 2.53 (t, *J* = 7.2 Hz, 2H), 2.44 – 2.37 (m, 2H), 1.80 (p, *J* = 7.1 Hz, 2H); <sup>13</sup>C NMR (101 MHz, CDCl<sub>3</sub>) δ 165.6, 138.5, 137.7, 133.3, 130.0, 128.9, 128.7, 128.6, 128.5, 127.1, 127.1, 87.4, 77.6, 66.6, 36.3, 30.4, 28.0, 18.1; IR (ATR): 2982, 2928, 1712, 1600, 1449, 1312, 1268, 1266, 1171, 1092, 1068, 1025, 993, 898, 858, 754, 669, 667, 663, 477 cm<sup>-1</sup>; HRMS (ESI) calculated for C<sub>26</sub>H<sub>25</sub>O<sub>2</sub>S<sup>+</sup> [M+H<sup>+</sup>]: 401.1570, found: 401.1568.

### 1,3-diphenylprop-2-yn-1-yl benzoate (**2j**)

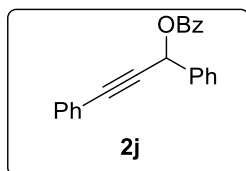

The preparation of **2j** was followed according to General Procedure B. Benzoylation reaction of the 1,3-diphenylprop-2-yn-1-ol (1.8 g, 8.6 mmol) with Et<sub>3</sub>N (12.0 mL, 86.0 mmol, 10.0 equiv.), DMAP (105.0 mg, 0.9 mmol, 0.1 equiv.), benzoyl chloride (2.0 mL, 17.2 mmol, 2.0 equiv.). Purification through SiO<sub>2</sub> flash column chromatography with elution (10% ethyl acetate in petroleum ether) afforded title compound **2j** as a yellow oil (1.8 g, 78%).

Spectral data for **2j**: <sup>1</sup>H NMR (400 MHz, CDCl<sub>3</sub>) δ 8.13 (d, *J* = 7.0 Hz, 2H), 7.71 (d, *J* = 6.7 Hz, 2H), 7.58 (t, *J* = 7.5 Hz, 1H), 7.51 (dd, *J* = 7.4, 2.2 Hz, 2H), 7.49 – 7.39 (m, 5H), 7.37 – 7.29 (m, 3H), 6.98 (s, 1H); <sup>13</sup>C NMR (101 MHz, CDCl<sub>3</sub>) δ 165.60, 137.37, 133.38, 132.08, 130.07, 129.92, 129.08, 128.93, 128.85, 128.52, 128.40, 127.92, 122.26, 87.39, 85.74, 66.74. This characterization data matches with the previously reported data.

### 3-cyclohexyl-1-(*p*-tolyl)prop-2-yn-1-yl benzoate (**2k**)

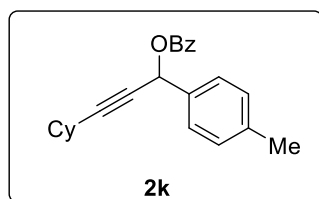

The preparation of **2k** was followed according to General Procedure B. The propargyl alcohol was synthesized by using cyclohexylacetylene (0.6 mL, 4.6 mmol, 1.0 equiv.), *n*-butyllithium (2.3 M in hexane, 2.2 mL, 5.0 mmol, 1.1 equiv.), *p*-tolualdehyde (0.8 mL, 7.0 mmol, 1.5 equiv.). Purification through

SiO<sub>2</sub> flash column chromatography with elution (10% ethyl acetate in petroleum ether) afforded propargyl alcohol (1.0 g, 99%) as a yellow oil. Benzoylation reaction of the above propargyl alcohol with Et<sub>3</sub>N (3.0 mL, 22.0 mmol, 5.0 equiv.), DMAP (54.0 mg, 0.44 mmol, 0.1 equiv.), benzoyl chloride (1.3 mL, 11.0 mmol, 2.5 equiv.). Purification through SiO<sub>2</sub> flash column chromatography with elution (10% ethyl acetate in petroleum ether) afforded title compound **2k** as a yellow oil (1.5 g, 99%).

Spectral data for **2k**: <sup>1</sup>H NMR (400 MHz, CDCl<sub>3</sub>) δ 8.08 (d, *J* = 7.3 Hz, 2H), 7.55 (t, *J* = 7.4 Hz, 1H), 7.48 – 7.38 (m, 4H), 7.30 – 7.24 (m, 1H), 7.16 (d, *J* = 7.6 Hz, 1H), 6.71 (s, 1H), 2.54 – 2.43 (m, 1H), 2.38 (s, 3H), 1.88 – 1.78 (m, 2H), 1.75 – 1.64 (m, 2H), 1.55 – 1.40 (m, 3H), 1.37 – 1.21 (m, 3H); <sup>13</sup>C NMR (101 MHz, CDCl<sub>3</sub>) δ 165.6, 138.2, 137.8, 133.1, 129.9, 129.5, 128.5, 128.3, 124.8, 92.4, 76.8, 66.6, 32.4, 29.1, 25.0, 24.8, 21.5; IR (ATR): 2929, 2854, 1718, 1601, 1514, 1450, 1315, 1257, 1175, 1094, 1068, 1025, 919, 813, 764, 709, 686, 573, 549 cm<sup>-1</sup>; HRMS (ESI) calculated for C<sub>23</sub>H<sub>25</sub>O<sub>2</sub><sup>+</sup> [M+H<sup>+</sup>]: 355.1669, found: 355.1669.

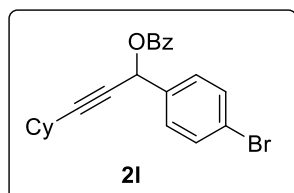

### 1-(4-bromophenyl)-3-cyclohexylprop-2-yn-1-yl benzoate (**2l**)

The preparation of **2l** was followed according to General Procedure B. The propargyl alcohol was synthesized by using cyclohexylacetylene (0.6 mL, 4.6 mmol, 1.0 equiv.), *n*-butyllithium (2.3 M in hexane, 2.2 mL, 5.0 mmol, 1.1 equiv.), 4-bromobenzaldehyde (1.3 g, 7.0 mmol, 1.5 equiv.). Purification through SiO<sub>2</sub> flash column chromatography with elution (10% ethyl acetate in petroleum ether) afforded propargyl alcohol (1.1 g, 82%) as a yellow oil. Benzoylation reaction of the above propargyl alcohol with Et<sub>3</sub>N (2.4 mL, 17.0 mmol, 3.7 equiv.), DMAP (41.0 mg, 0.34 mmol, 0.1 equiv.), benzoyl chloride (1.0 mL, 8.5 mmol, 1.8 equiv.). Purification through SiO<sub>2</sub> flash column chromatography with elution (11% ethyl acetate in petroleum ether) afforded title compound **2l** as a yellow oil (1.2 g, 80%).

Spectral data for **2l**: <sup>1</sup>H NMR (400 MHz, CDCl<sub>3</sub>) δ 8.06 (d, *J* = 7.1 Hz, 2H), 7.58 – 7.48 (m, 5H), 7.43 (t, *J* = 8.4, 7.1 Hz, 2H), 6.69 (s, 1H), 2.53 – 2.40 (m, 1H), 1.86 – 1.77 (m, 2H), 1.75 – 1.65 (m, 2H), 1.55 – 1.42 (m, 3H), 1.37 – 1.26 (m, 3H); <sup>13</sup>C NMR (101 MHz, CDCl<sub>3</sub>) δ 165.5, 137.1, 133.4, 131.8, 130.0, 129.9, 129.6, 128.5, 122.9, 93.1, 76.3, 66.0, 32.4, 29.2, 25.9, 24.9;

**IR (ATR):** 2930, 2854, 1718, 1585, 1487, 1450, 1407, 1316, 1290, 1257, 1175, 1093, 1068, 1025, 1012, 926, 820, 755, 709, 686, 667, 551  $\text{cm}^{-1}$ ; **HRMS (ESI)** calculated for  $\text{C}_{22}\text{H}_{22}\text{BrO}_2^+$   $[\text{M}+\text{H}^+]$ : 397.0798, found: 397.0794.

### 1-([1,1'-biphenyl]-4-yl)-3-cyclohexylprop-2-yn-1-yl benzoate (**2m**)

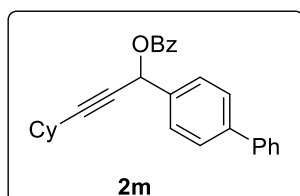

The preparation of **2m** was followed according to General Procedure B. The propargyl alcohol was synthesized by using cyclohexylacetylene (0.5 mL, 3.8 mmol, 1.0 equiv.), *n*-butyllithium (2.3 M in hexane, 1.8 mL, 4.2 mmol, 1.1 equiv.), 4-biphenylcarboxaldehyde (1.1 g, 6.0 mmol, 1.5 equiv.).

Purification through  $\text{SiO}_2$  flash column chromatography with elution (10% ethyl acetate in petroleum ether) afforded propargyl alcohol (1.1 g, 99%) as a yellow oil. Benzoylation reaction of the above propargyl alcohol with  $\text{Et}_3\text{N}$  (2.6 mL, 19.0 mmol, 5.0 equiv.), DMAP (46.0 mg, 0.4 mmol, 0.1 equiv.), benzoyl chloride (1.1 mL, 9.5 mmol, 2.5 equiv.). Purification through  $\text{SiO}_2$  flash column chromatography with elution (10% ethyl acetate in petroleum ether) afforded title compound **2m** as a yellow oil (1.4 g, 93%).

Spectral data for **2m**:  $^1\text{H}$  NMR (400 MHz,  $\text{CDCl}_3$ )  $\delta$  8.12 (d,  $J = 8.3$  Hz, 2H), 7.72 (d,  $J = 7.9$  Hz, 2H), 7.66 – 7.60 (m, 4H), 7.56 (t,  $J = 7.4$  Hz, 1H), 7.49 – 7.42 (m, 4H), 7.37 (t,  $J = 7.3$  Hz, 1H), 6.82 (s, 1H), 2.58 – 2.47 (m, 1H), 1.92 – 1.81 (m, 2H), 1.80 – 1.68 (m, 2H), 1.59 – 1.48 (m, 3H), 1.39 – 1.28 (m, 3H);  $^{13}\text{C}$  NMR (101 MHz,  $\text{CDCl}_3$ )  $\delta$  165.7, 141.8, 140.7, 137.0, 133.2, 130.2, 130.0, 128.9, 128.5, 128.4, 127.6, 127.4, 127.3, 92.8, 76.8, 66.5, 32.5, 29.3, 26.0, 24.9; **IR (ATR):** 2928, 2852, 1717, 1600, 1485, 1450, 1315, 1290, 1175, 1093, 1068, 1025, 993, 904, 765, 709, 666, 551  $\text{cm}^{-1}$ ; **HRMS (ESI)** calculated for  $\text{C}_{28}\text{H}_{27}\text{O}_2^+$   $[\text{M}+\text{H}^+]$ : 395.2006, found: 395.2002.

### 3-cyclohexyl-1-(*m*-tolyl)prop-2-yn-1-yl benzoate (**2n**)

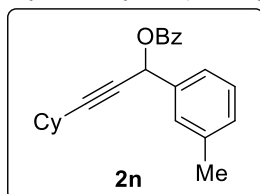

The preparation of **2n** was followed according to General Procedure B. The propargyl alcohol was synthesized by using cyclohexylacetylene (0.6 mL, 4.6 mmol, 1.0 equiv.), *n*-butyllithium (2.3 M in hexane, 2.2 mL, 5.0 mmol, 1.1 equiv.), *m*-tolualdehyde (0.8

mL, 7.0 mmol, 1.5 equiv.). Purification through  $\text{SiO}_2$  flash column chromatography with elution (33% ethyl acetate in petroleum ether) afforded propargyl alcohol (1.0 g, 99%) as a yellow oil. Benzoylation reaction of the above propargyl alcohol with  $\text{Et}_3\text{N}$  (2.4 mL, 17.0 mmol, 3.7 equiv.), DMAP (56.0 mg, 0.46 mmol, 0.1 equiv.), benzoyl chloride (1.3 mL, 11.5 mmol, 2.5 equiv.). Purification through  $\text{SiO}_2$  flash column chromatography with elution (10% ethyl acetate in

petroleum ether) afforded title compound **2n** as a yellow oil (0.9 g, 61%).

Spectral data for **2n**:  $^1\text{H NMR}$  (400 MHz,  $\text{CDCl}_3$ )  $\delta$  8.08 (d,  $J = 8.4$  Hz, 2H), 7.55 (t,  $J = 7.4$  Hz, 1H), 7.47 – 7.38 (m, 4H), 7.29 (d,  $J = 7.4$  Hz, 1H), 7.16 (d,  $J = 7.6$  Hz, 1H), 6.70 (s, 1H), 2.53 – 2.44 (m, 1H), 2.38 (s, 3H), 1.87 – 1.77 (m, 2H), 1.76 – 1.66 (m, 2H), 1.55 – 1.44 (m, 3H), 1.37 – 1.22 (m, 3H);  $^{13}\text{C NMR}$  (101 MHz,  $\text{CDCl}_3$ )  $\delta$  165.7, 138.4, 137.9, 133.2, 130.3, 130.0, 129.6, 128.60, 128.58, 128.5, 125.0, 92.5, 66.8, 32.5, 29.3, 26.0, 24.9, 21.6; **IR (ATR)**: 2930, 2854, 1719, 1601, 1450, 1315, 1257, 1175, 1093, 1068, 1025, 935, 900, 788, 747, 710  $\text{cm}^{-1}$ ; **HRMS (ESI)** calculated for  $\text{C}_{23}\text{H}_{25}\text{O}_2^+$  [ $\text{M}+\text{H}^+$ ]: 333.1849, found: 333.1850.

### 1-(3-chlorophenyl)-3-cyclohexylprop-2-yn-1-yl benzoate (**2o**)

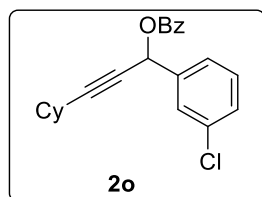

The preparation of **2o** was followed according to General Procedure B. The propargyl alcohol was synthesized by using cyclohexylacetylene (0.5 mL, 3.8 mmol, 1.0 equiv.), *n*-butyllithium (2.3 M in hexane, 1.8 mL, 4.2 mmol, 1.1 equiv.), 3-chlorobenzaldehyde (0.7 mL, 6.0 mmol, 1.5 equiv.). Purification through  $\text{SiO}_2$  flash column chromatography with elution (10% ethyl acetate in petroleum ether) afforded propargyl alcohol (0.9 g, 99%) as a yellow oil. Benzoylation reaction of the above propargyl alcohol with  $\text{Et}_3\text{N}$  (2.6 mL, 19.0 mmol, 5.0 equiv.), DMAP (46.0 mg, 0.4 mmol, 0.1 equiv.), benzoyl chloride (1.1 mL, 9.5 mmol, 2.5 equiv.). Purification through  $\text{SiO}_2$  flash column chromatography with elution (10% ethyl acetate in petroleum ether) afforded title compound **2o** as a yellow oil (1.1 g, 82%).

Spectral data for **2o**:  $^1\text{H NMR}$  (400 MHz,  $\text{CDCl}_3$ )  $\delta$  8.08 (d,  $J = 7.0$  Hz, 2H), 7.63 (s, 1H), 7.57 (t,  $J = 7.4$  Hz, 1H), 7.51 – 7.42 (m, 3H), 7.37 – 7.30 (m, 2H), 6.70 (s, 1H), 2.55 – 2.43 (m, 1H), 1.88 – 1.78 (m, 2H), 1.75 – 1.65 (m, 2H), 1.57 – 1.42 (m, 3H), 1.38 – 1.28 (m, 3H);  $^{13}\text{C NMR}$  (101 MHz,  $\text{CDCl}_3$ )  $\delta$  165.5, 139.9, 134.5, 133.4, 130.02, 129.95, 129.9, 129.0, 128.5, 128.0, 126.0, 93.2, 76.2, 65.9, 32.4, 29.2, 25.9, 24.9; **IR (ATR)**: 2929, 2853, 1719, 1599, 1577, 1449, 1433, 1315, 1259, 1246, 1195, 1176, 1092, 1068, 1025, 934, 877, 786, 756, 709, 689, 671  $\text{cm}^{-1}$ ; **HRMS (ESI)** calculated for  $\text{C}_{22}\text{H}_{21}\text{O}_2\text{ClNa}^+$  [ $\text{M}+\text{Na}^+$ ]: 375.1122, found: 375.1118.

### 3-cyclohexyl-1-(2-methoxyphenyl)prop-2-yn-1-yl benzoate (**2p**)

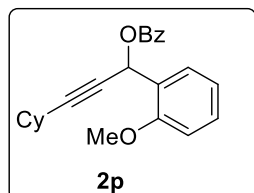

The preparation of **2p** was followed according to General Procedure B. The propargyl alcohol was synthesized by using cyclohexylacetylene (0.5 mL, 3.8 mmol, 1.0 equiv.), *n*-butyllithium (2.3 M in hexane, 1.8 mL, 4.2 mmol, 1.1 equiv.), *o*-anisaldehyde (0.7 mL, 6.0 mmol, 1.5 equiv.). Purification through  $\text{SiO}_2$  flash column chromatography with elution (10% ethyl acetate in petroleum ether) afforded propargyl alcohol (0.7 g, 81%) as a yellow oil. Benzoylation



reaction of the above propargyl alcohol with Et<sub>3</sub>N (2.0 mL, 15.0 mmol, 4.0 equiv.), DMAP (37.0 mg, 0.4 mmol, 0.8 equiv.), benzoyl chloride (0.9 mL, 7.5 mmol, 2.0 equiv.). Purification through SiO<sub>2</sub> flash column chromatography with elution (10% ethyl acetate in petroleum ether) afforded title compound **2p** as a yellow oil (0.9 g, 88%).

Spectral data for **2p**: <sup>1</sup>H NMR (400 MHz, CDCl<sub>3</sub>) δ 8.07 (d, *J* = 7.0 Hz, 2H), 7.83 (d, *J* = 7.6 Hz, 1H), 7.54 (t, *J* = 7.4 Hz, 1H), 7.42 (t, *J* = 7.7 Hz, 2H), 7.41 – 7.32 (m, 1H), 7.10 – 7.02 (m, 2H), 6.90 (d, *J* = 7.3 Hz, 1H), 3.80 (s, 3H), 2.60 – 2.41 (m, 1H), 1.88 – 1.79 (m, 2H), 1.76 – 1.67 (m, 2H), 1.56 – 1.46 (m, 3H), 1.38 – 1.25 (m, 3H); <sup>13</sup>C NMR (101 MHz, CDCl<sub>3</sub>) δ 165.5, 157.0, 132.9, 130.4, 130.2, 129.9, 129.1, 128.3, 126.0, 120.5, 110.8, 91.9, 76.8, 61.6, 55.6, 32.5, 29.2, 25.9, 24.9; IR (ATR): 2929, 2853, 1719, 1602, 1589, 1492, 1463, 1445, 1315, 1287, 1245, 1174, 1162, 1094, 1068, 1049, 1025, 945, 919, 901, 753, 710, 687, 597 cm<sup>-1</sup>; HRMS (ESI) calculated for C<sub>23</sub>H<sub>25</sub>O<sub>3</sub><sup>+</sup> [M+H<sup>+</sup>]: 349.1798, found: 349.1797.

### 3-cyclohexyl-1-(3,5-dimethylphenyl)prop-2-yn-1-yl benzoate (**2q**)

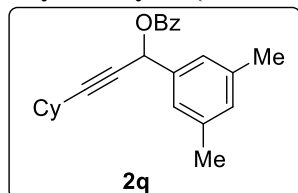

The preparation of **2q** was followed according to General Procedure B. The propargyl alcohol was synthesized by using cyclohexylacetylene (0.6 mL, 4.6 mmol, 1.0 equiv.), *n*-butyllithium (2.3 M in hexane, 2.2 mL, 5.0 mmol, 1.1 equiv.), 3,5-dimethylbenzaldehyde (0.9 mL, 7.0 mmol, 1.5 equiv.). Purification through SiO<sub>2</sub> flash column chromatography with elution (10% ethyl acetate in petroleum ether) afforded propargyl alcohol (1.0 g, 90%) as a yellow oil. Benzoylation reaction of the above propargyl alcohol with Et<sub>3</sub>N (2.4 mL, 17.0 mmol, 4.0 equiv.), DMAP (56.0 mg, 0.46 mmol, 0.1 equiv.), benzoyl chloride (1.3 mL, 11.5 mmol, 2.5 equiv.). Purification through SiO<sub>2</sub> flash column chromatography with elution (10% ethyl acetate in petroleum ether) afforded title compound **2q** as a yellow oil (1.4 g, 96%).

Spectral data for **2q**: <sup>1</sup>H NMR (400 MHz, CDCl<sub>3</sub>) δ 8.10 (d, *J* = 7.0 Hz, 2H), 7.56 (t, *J* = 7.4 Hz, 1H), 7.44 (t, *J* = 7.5 Hz, 2H), 7.25 (s, 2H), 7.00 (s, 1H), 6.70 (s, 1H), 2.55 – 2.44 (m, 1H), 2.36 (s, 6H), 1.88 – 1.79 (m, 2H), 1.78 – 1.70 (m, 2H), 1.58 – 1.47 (m, 3H), 1.39 – 1.28 (m, 3H); <sup>13</sup>C NMR (101 MHz, CDCl<sub>3</sub>) δ 165.7, 138.2, 137.8, 133.1, 130.5, 130.3, 130.0, 128.4, 125.7, 92.3, 77.0, 66.8, 32.5, 29.2, 26.0, 24.9, 21.4; IR (ATR): 2930, 2855, 1718, 1603, 1450, 1315, 1262, 1176, 1094, 1068, 1025, 933, 849, 755, 711, 666 cm<sup>-1</sup>; HRMS (ESI) calculated for C<sub>24</sub>H<sub>27</sub>O<sub>2</sub><sup>+</sup> [M+H<sup>+</sup>]: 347.2006, found: 347.2006.

### 3-cyclohexyl-1-(naphthalen-1-yl)prop-2-yn-1-yl benzoate (**2r**)

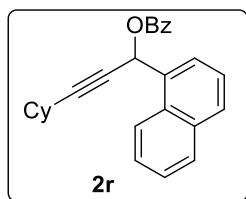

The preparation of **2r** was followed according to General Procedure B. The propargyl alcohol was synthesized by using cyclohexylacetylene (0.4 mL, 3.7 mmol, 1.0 equiv.), *n*-butyllithium (2.3 M in hexane, 1.8 mL, 4.0 mmol, 1.1 equiv.), 1-naphthaldehyde (0.9 mL, 5.6 mmol, 1.5 equiv.). Purification through SiO<sub>2</sub> flash column chromatography with elution (10% ethyl acetate in petroleum ether) afforded propargyl alcohol (0.9 g, 92%) as a yellow oil. Benzoylation reaction of the above propargyl alcohol with Et<sub>3</sub>N (2.4 mL, 17.0 mmol, 4.6 equiv.), DMAP (41.0 mg, 0.34 mmol, 0.1 equiv.), benzoyl chloride (1.0 mL, 8.5 mmol, 2.3 equiv.). Purification through SiO<sub>2</sub> flash column chromatography with elution (10% ethyl acetate in petroleum ether) afforded title compound **2r** as a yellow oil (0.9 g, 71%).

Spectral data for **2r**: <sup>1</sup>H NMR (400 MHz, CDCl<sub>3</sub>) δ 8.14 – 8.08(m, 3H), 7.93 – 7.82 (m, 3H), 7.75 (d, *J* = 8.6 Hz, 1H), 7.56 (t, *J* = 7.5 Hz, 1H), 7.54 – 7.47 (m, 2H), 7.44 (t, *J* = 7.6 Hz, 2H), 6.93 (s, 1H), 2.63 – 2.45 (m, 1H), 1.91 – 1.82 (m, 2H), 1.79 – 1.69 (m, 2H), 1.59 – 1.47 (m, 3H), 1.40 – 1.29 (m, 3H); <sup>13</sup>C NMR (101 MHz, CDCl<sub>3</sub>) δ 165.7, 135.3, 133.5, 133.2, 133.1, 130.1, 130.0, 128.6, 128.5, 127.8, 127.2, 126.6, 126.4, 125.4, 93.0, 66.9, 32.5, 29.3, 25.9, 24.9; IR (ATR): 3062, 3030, 2916, 1717, 1601, 1584, 1494, 1451, 1315, 1248, 1175, 1094, 1068, 1025, 937, 909, 756, 709, 697, 629, 588, 565, 471 cm<sup>-1</sup>; HRMS (ESI) calculated for C<sub>26</sub>H<sub>25</sub>O<sub>2</sub><sup>+</sup> [M+H<sup>+</sup>]: 369.1849, found: 369.1849.

### 3-cyclohexyl-1-(naphthalen-1-yl)prop-2-yn-1-yl benzoate (**2s**)

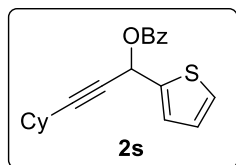

The preparation of **2s** was followed according to General Procedure B. The propargyl alcohol was synthesized by using cyclohexylacetylene (0.5 mL, 3.8 mmol, 1.0 equiv.), *n*-butyllithium (2.3 M in hexane, 1.8 mL, 4.2 mmol, 1.1 equiv.), thiophenecarboxaldehyde (0.6 mL, 6.0 mmol, 1.5 equiv.). Purification through SiO<sub>2</sub> flash column chromatography with elution (10% ethyl acetate in petroleum ether) afforded propargyl alcohol (0.9 g, 95%) as a yellow oil. Benzoylation reaction of the above propargyl alcohol with Et<sub>3</sub>N (2.5 mL, 18.0 mmol, 4.7 equiv.), DMAP (44.0 mg, 0.4 mmol, 0.1 equiv.), benzoyl chloride (1.0 mL, 9.0 mmol, 2.4 equiv.). Purification through SiO<sub>2</sub> flash column chromatography with elution (10% ethyl acetate in petroleum ether) afforded title compound **2s** as a yellow oil (1.2 g, 99%).

Spectral data for **2s**: <sup>1</sup>H NMR (400 MHz, CDCl<sub>3</sub>) δ 8.08 (d, *J* = 7.0 Hz, 2H), 7.56 (t, *J* = 7.4 Hz, 1H), 7.43 (t, *J* = 7.8 Hz, 2H), 7.33 (dd, *J* = 5.1, 1.3 Hz, 1H), 7.30 (d, *J* = 3.5 Hz, 1H), 7.01 – 6.97 (m, 1H), 6.95 (d, *J* = 1.9 Hz, 1H), 2.55 – 2.46 (m, 1H), 1.87 – 1.80 (m, 2H), 1.76 – 1.69

(m, 2H), 1.56 – 1.48 (m, 3H), 1.38 – 1.30 (m, 3H);  $^{13}\text{C}$  NMR (101 MHz,  $\text{CDCl}_3$ )  $\delta$  165.6, 141.3, 133.3, 130.1, 130.0, 128.5, 127.6, 126.9, 126.8, 92.2, 76.5, 61.9, 32.4, 29.2, 26.0, 24.9; **IR** (**ATR**): 2929, 2854, 1718, 1601, 1494, 1451, 1315, 1258, 1175, 1093, 1067, 1025, 937, 904, 756, 709, 686, 597, 565  $\text{cm}^{-1}$ ; **HRMS** (ESI) calculated for  $\text{C}_{20}\text{H}_{21}\text{O}_2\text{S}^+$  [ $\text{M}+\text{H}^+$ ]: 325.1257, found: 325.1259.

### 3.5 General procedure C for the preparation of $\gamma$ -Aminoketones

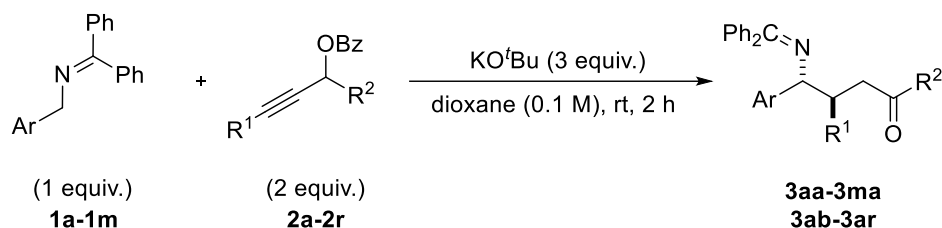

In a nitrogen-filled glove box, to an oven dried 1-dram vial with a magnetic stir bar was charged with imines **1a - 1m** (0.2 mmol, 1.0 equiv.),  $\text{K}^t\text{OBu}$  (0.6 mmol, 3.0 equiv.) and 1,4-dioxane (2 mL). The reaction mixture was stirred at room temperature for 5 min and alkynes **2a - 2r** (0.4 mmol, 2.0 equiv.) were subsequently added. The vial was capped, removed from glovebox and stirred at rt for 2h. The reaction mixture was added via glass pipet into a 10 mL vial containing 5 mL of petroleum ether to allow the salts to precipitate. The resulting mixture was filtered through a pad of celite, rinsed with petroleum ether (5 mL X 2) and the filtrate was concentrated *in vacuo*. The crude was purified through  $\text{SiO}_2$  flash column chromatography to obtain products **3aa-3ma** and **3ab-3ar**. The diastereoselectivity (anti/syn ratio) of the reaction was confirmed by analyzing the  $^1\text{H}$  NMR of crude product.

### 3.6 Characterization data of $\gamma$ -Aminoketones

#### 3-cyclohexyl-4-((diphenylmethylene)amino)-1,4-diphenylbutan-1-one (**3aa**)

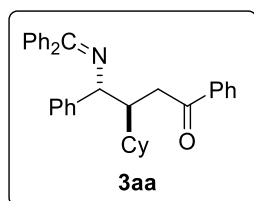

The preparation of **3aa** was followed according to General Procedure C.  $^1\text{H}$  NMR analysis of the crude revealed a 10:1 mixture of anti and syn isomer. **3aa** was isolated as a pale-yellow film (81 mg, 83%) and was diastereoisomeric pure.

$R_f$  = 0.56 [0.5% triethylamine in petroleum ether].

$^1\text{H}$  NMR (400 MHz,  $\text{CDCl}_3$ ):  $\delta$  7.86 (d,  $J$  = 7.6 Hz, 2H), 7.69 (d,  $J$  = 7.6 Hz, 2H), 7.49 (t,  $J$  = 7.2 Hz, 1H), 7.47 – 7.31 (m, 9H), 7.28 – 7.27 (m, 3H), 7.23 – 7.15 (m, 1H), 6.98 (d,  $J$  = 7.0 Hz, 2H), 4.68 (d,  $J$  = 4.8 Hz, 1H), 3.28 (dd,  $J$  = 16.9, 4.2 Hz, 1H), 3.16 (dd,  $J$  = 16.9, 7.3 Hz, 1H), 2.87 – 2.70 (m, 1H), 1.71 – 1.56 (m, 3H), 1.54 – 1.42 (m, 2H), 1.33 – 1.16 (m, 1H), 1.13 – 1.03

(m, 3H), 1.03 – 0.81 (m, 2H);  $^{13}\text{C}$  NMR (101 MHz,  $\text{CDCl}_3$ ):  $\delta$  200.9, 167.4, 144.8, 140.0, 137.6, 136.9, 132.5, 130.1, 128.8, 128.6, 128.4, 128.3, 128.3, 128.3, 128.1, 127.8, 127.6, 126.6, 66.8, 47.9, 40.1, 37.6, 31.4, 30.3, 26.9, 26.8, 26.7; **IR (ATR)**: 2921, 2850, 1680, 1620, 1597, 1579, 1491, 1446, 1314, 1272, 1002, 773, 749, 692  $\text{cm}^{-1}$ ; **HRMS (ESI)**: calculated for  $\text{C}_{35}\text{H}_{36}\text{NO}^+$   $[\text{M}+\text{H}^+]$ : 486.2791, found: 486.2791.

### 3-cyclohexyl-4-((diphenylmethylene)amino)-1-phenyl-4-(*p*-tolyl)butan-1-one (**3ba**)

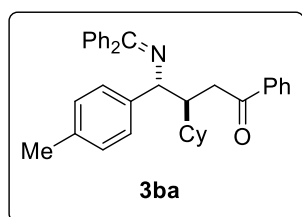

The preparation of **3ba** was followed according to General Procedure C.  $^1\text{H}$  NMR analysis of the crude revealed a 7:1 mixture of anti and syn isomer. **3ba** was isolated as a yellow oil (72 mg, 72%) and was diastereoisomeric pure.

$R_f$  = 0.50 [0.5% triethylamine in petroleum ether].

$^1\text{H}$  NMR (400 MHz,  $\text{CDCl}_3$ ):  $\delta$  7.83 (d,  $J$  = 7.1 Hz, 2H), 7.64 (d,  $J$  = 6.9 Hz, 2H), 7.47 (t,  $J$  = 7.2 Hz, 1H), 7.43 – 7.28 (m, 8H), 7.11 (d,  $J$  = 8.0 Hz, 2H), 7.04 (d,  $J$  = 7.9 Hz, 2H), 6.96 (d,  $J$  = 5.9 Hz, 2H), 4.61 (d,  $J$  = 4.8 Hz, 1H), 3.22 (dd,  $J$  = 16.9, 4.2 Hz, 1H), 3.11 (dd,  $J$  = 16.9, 7.4 Hz, 1H), 2.74 – 2.66 (m, 1H), 2.29 (s, 3H), 1.63 – 1.53 (m, 3H), 1.52 – 1.39 (m, 2H), 1.22 – 1.14 (m, 1H), 1.08 – 0.98 (m, 3H), 0.98 – 0.83 (m, 2H);  $^{13}\text{C}$  NMR (101 MHz,  $\text{CDCl}_3$ ):  $\delta$  201.0, 167.2, 141.8, 140.1, 137.6, 137.0, 136.0, 132.5, 130.0, 129.0, 128.8, 128.5, 128.4, 128.3, 128.2, 128.1, 127.8, 127.4, 66.6, 48.0, 40.1, 37.6, 31.5, 30.3, 26.9, 26.8, 26.7, 21.2; **IR (ATR)**: 2922, 2850, 1682, 1622, 1446, 1314, 1273, 1179, 1002, 753, 730, 692  $\text{cm}^{-1}$ ; **HRMS (ESI)** calculated for  $\text{C}_{36}\text{H}_{38}\text{NO}^+$   $[\text{M}+\text{H}^+]$ : 500.2948, found: 500.2948.

### 3-cyclohexyl-4-((diphenylmethylene)amino)-4-(4-methoxyphenyl)-1-phenylbutan-1-one (**3ca**)

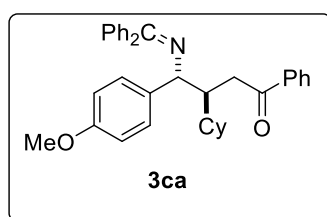

The preparation of **3ca** was followed according to General Procedure C.  $^1\text{H}$  NMR analysis of the crude revealed a 5:1 mixture of anti and syn isomer. **3ca** was isolated as a white solid (68 mg, 66%) and was diastereoisomeric pure.

$R_f$  = 0.54 [5% ethyl acetate in petroleum ether (containing 0.5% triethylamine)].

$^1\text{H}$  NMR (400 MHz,  $\text{CDCl}_3$ ):  $\delta$  7.86 (d,  $J$  = 7.0 Hz, 2H), 7.65 (d,  $J$  = 6.7 Hz, 2H), 7.48 (t,  $J$  = 7.2 Hz, 1H), 7.44 – 7.32 (m, 8H), 7.14 (d,  $J$  = 8.3 Hz, 2H), 6.96 (d,  $J$  = 6.2 Hz, 2H), 6.79 (d,  $J$  = 8.5 Hz, 2H), 4.59 (d,  $J$  = 5.0 Hz, 1H), 3.77 (s, 3H), 3.23 (dd,  $J$  = 16.9, 4.2 Hz, 1H), 3.11 (dd,  $J$  = 16.9, 7.2 Hz, 1H), 2.77 – 2.65 (m, 1H), 1.84 – 1.66 (m, 1H), 1.63 – 1.52 (m, 2H), 1.46 (m, 2H), 1.26 – 1.17 (m, 1H), 1.08 – 1.01 (m, 3H), 1.01 – 0.77 (m, 2H);  $^{13}\text{C}$  NMR (101 MHz,

CDCl<sub>3</sub>):  $\delta$  201.0, 167.2, 158.2, 140.0, 137.6, 137.0, 136.9, 132.5, 130.0, 128.8, 128.5, 128.4, 128.32, 128.25, 128.1, 127.8, 113.7, 66.3, 55.3, 48.0, 40.0, 37.6, 31.5, 30.2, 26.9, 26.8, 26.7; **IR (ATR)**: 2957, 2930, 2859, 1453, 1270, 1131, 1057, 1028, 1002, 919, 755, 728, 697 cm<sup>-1</sup>; **HRMS (ESI)** calculated for C<sub>36</sub>H<sub>37</sub>NO<sub>2</sub>Na<sup>+</sup> [M+Na<sup>+</sup>]: 538.2716, found: 538.2711.

**3-cyclohexyl-4-((diphenylmethylene)amino)-4-(4-(methylthio)phenyl)-1-phenylbutan-1-one (3da)**

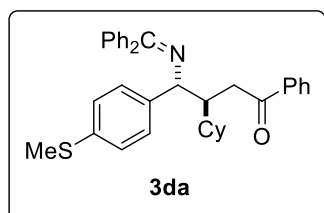

The preparation of **3da** was followed according to General Procedure C. <sup>1</sup>H NMR analysis of the crude revealed a 5:1 mixture of anti and syn isomer. **3da** was isolated as a yellow solid (72 mg, 68%) and was diastereoisomeric pure.

$R_f$  = 0.34 [5% ethyl acetate in petroleum ether (containing 0.5% triethylamine)].

**<sup>1</sup>H NMR** (400 MHz, CDCl<sub>3</sub>) :  $\delta$  7.84 (d,  $J$  = 7.7 Hz, 2H), 7.64 (d,  $J$  = 7.1 Hz, 2H), 7.48 (t,  $J$  = 7.4 Hz, 1H), 7.42 – 7.31 (m, 8H), 7.20 – 7.09 (m, 4H), 6.95 (d,  $J$  = 7.1 Hz, 2H), 4.59 (d,  $J$  = 4.9 Hz, 1H), 3.21 (dd,  $J$  = 17.0, 4.2 Hz, 1H), 3.11 (dd,  $J$  = 16.7, 7.1 Hz, 1H), 2.77 – 2.67 (m, 1H), 2.45 (s, 3H), 1.63 – 1.56 (m, 3H), 1.48 – 1.41 (m, 2H), 1.24 – 1.15 (m, 1H), 1.08 – 0.98 (m, 3H), 0.95 – 0.85 (m, 2H); **<sup>13</sup>C NMR** (101 MHz, CDCl<sub>3</sub>):  $\delta$  200.8, 167.6, 141.8, 139.9, 137.5, 136.9, 136.1, 132.6, 130.1, 128.8, 128.6, 128.4, 128.30, 128.28, 128.10, 128.08, 127.7, 126.7, 66.4, 47.8, 40.0, 37.5, 31.5, 30.3, 26.9, 26.8, 26.7, 16.1; **IR (ATR)**: 2921, 2851, 1683, 1617, 1597, 1577, 1489, 1445, 1314, 1253, 1002, 754, 737, 704, 695, 684 cm<sup>-1</sup>; **HRMS (ESI)** calculated for C<sub>36</sub>H<sub>38</sub>NOS<sup>+</sup> [M+H<sup>+</sup>]: 532.2669, found: 532.2669.

**3-cyclohexyl-4-((diphenylmethylene)amino)-4-(4-phenoxyphenyl)-1-phenylbutan-1-one (3ea)**

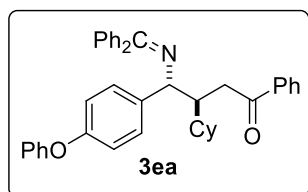

The preparation of **3ea** was followed according to General Procedure C. <sup>1</sup>H NMR analysis of the crude revealed a 5:1 mixture of anti and syn isomer. **3ea** was isolated as a white solid (72 mg, 62%) and was diastereoisomeric pure.

$R_f$  = 0.45 [0.5% triethylamine in petroleum ether].

**<sup>1</sup>H NMR** (400 MHz, CDCl<sub>3</sub>):  $\delta$  7.88 (d,  $J$  = 7.2 Hz, 2H), 7.65 (d,  $J$  = 7.0 Hz, 2H), 7.49 (t,  $J$  = 7.3 Hz, 1H), 7.42 – 7.28 (m, 10H), 7.19 (d,  $J$  = 8.3 Hz, 2H), 7.07 (t,  $J$  = 7.4 Hz, 1H), 7.02 – 6.92 (m, 4H), 6.89 (d,  $J$  = 8.6 Hz, 2H), 4.62 (d,  $J$  = 4.9 Hz, 1H), 3.30 (dd,  $J$  = 17.0, 4.4 Hz, 1H), 3.09 (dd,  $J$  = 16.9, 7.0 Hz, 1H), 2.83 – 2.67 (m, 1H), 1.63 – 1.52 (m, 3H), 1.52 – 1.42 (m, 2H), 1.28 – 1.16 (m, 1H), 1.08 – 1.02 (m, 3H), 1.01 – 0.82 (m, 2H); **<sup>13</sup>C NMR** (101 MHz, CDCl<sub>3</sub>):  $\delta$  200.8, 167.4, 157.5, 155.6, 139.9, 139.8, 137.6, 136.9, 132.6, 130.1, 129.8, 128.84, 128.78,

128.6, 128.4, 128.3, 128.1, 127.8, 123.1, 118.9, 118.7, 66.3, 47.9, 40.1, 37.2, 31.5, 30.2, 26.9, 26.8, 26.7; **IR (ATR)**: 2922, 2850, 1683, 1589, 1505, 1489, 1447, 1233, 1166, 749, 690  $\text{cm}^{-1}$ ; **HRMS (ESI)** calculated for  $\text{C}_{41}\text{H}_{39}\text{NO}_2\text{K}^+$   $[\text{M}+\text{K}^+]$ : 616.2612, found: 616.2612.

**4-(4-chlorophenyl)-3-cyclohexyl-4-((diphenylmethylene)amino)-1-phenylbutan-1-one (3fa)**

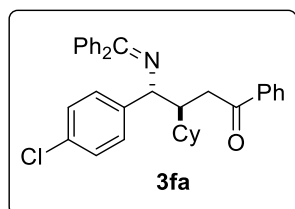

The preparation of **3fa** was followed according to General Procedure C.  $^1\text{H}$  NMR analysis of the crude revealed a 3:1 mixture of anti and syn isomer. **3fa** was isolated as a milky white gummy (62 mg, 60% combined) consisting of two diastereomers (~2:1 isolated dr).

$R_f = 0.50$  [5% ethyl acetate in petroleum ether (containing 0.5% triethylamine)].

These reported data are for the mixture of diastereomers.  $^1\text{H}$  NMR (400 MHz,  $\text{CDCl}_3$ ):  $\delta$  7.85 (d,  $J = 7.3$  Hz, 1.3 H), 7.77 (d,  $J = 7.7$  Hz, 0.35H), 7.69 – 7.60 (m, 2.35H), 7.49 (t,  $J = 6.9$  Hz, 1H), 7.42 – 7.30 (m, 8H), 7.16 (m, 4H), 6.91 (dd,  $J = 14.7, 6.5$  Hz, 2H), 4.60 (d,  $J = 4.9$  Hz, 0.65H), 4.35 (d,  $J = 4.9$  Hz, 0.35H), 3.19 (dd,  $J = 17.1, 4.5$  Hz, 0.65H), 3.11 (dd,  $J = 17.1, 6.8$  Hz, 0.65H), 2.94 – 2.81 (m, 0.70H), 2.75 – 2.69 (m, 0.65H), 2.66 (dd,  $J = 15.7, 4.3$  Hz, 0.35H), 1.65 – 1.56 (m, 4H), 1.48 – 1.42 (m, 1H), 1.22 – 1.14 (m, 1H), 1.11 – 0.98 (m, 3H), 0.96 – 0.81 (m, 2H);  $^{13}\text{C}$  NMR (101 MHz,  $\text{CDCl}_3$ ):  $\delta$  200.6, 200.0, 167.9, 167.2, 143.4, 142.0, 139.9, 139.8, 137.53, 137.48, 136.9, 136.8, 132.6, 132.5, 132.2, 130.2, 130.1, 129.9, 128.9, 128.8, 128.7, 128.52, 128.48, 128.44, 128.36, 128.35, 128.31, 128.29, 128.25, 128.2, 128.1, 128.0, 127.74, 127.65, 67.6, 66.2, 47.8, 47.1, 40.1, 38.6, 37.4, 36.6, 32.7, 31.5, 30.2, 28.5, 27.0, 26.9, 26.83, 26.77, 26.6; **IR (ATR)**: 2923, 2850, 1682, 1597, 1488, 1446, 1314, 1274, 1089, 1014, 1002, 827, 752, 733, 691  $\text{cm}^{-1}$ ; **HRMS (ESI)** calculated for  $\text{C}_{35}\text{H}_{35}\text{ClO}^+$   $[\text{M}+\text{H}^+]$ : 520.2402, found: 520.2402.

**4-(4-bromophenyl)-3-cyclohexyl-4-((diphenylmethylene)amino)-1-phenylbutan-1-one (3ga)**

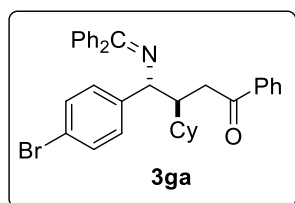

The preparation of **3ga** was followed according to General Procedure C.  $^1\text{H}$  NMR analysis of the crude revealed a 5:1 mixture of anti and syn isomer. **3ga** was isolated as a yellow solid (112 mg, 99% combined) consisting of two diastereomers (5:1 isolated dr).

Analytical sample of the major isomer was obtained via further recrystallization in MeOH for characterization.

$R_f = 0.31$  [0.5% triethylamine in petroleum ether].

$^1\text{H}$  NMR (400 MHz,  $\text{CDCl}_3$ ):  $\delta$  7.85 (d,  $J = 6.8$  Hz, 2H), 7.63 (d,  $J = 6.8$  Hz, 2H), 7.49 (t,  $J =$

7.3 Hz, 1H), 7.41 – 7.31 (m, 10H), 7.11 (d,  $J = 8.4$  Hz, 2H), 6.93 (d,  $J = 7.1$  Hz, 2H), 4.60 (d,  $J = 4.2$  Hz, 1H), 3.20 (dd,  $J = 17.0, 4.0$  Hz, 1H), 3.12 (dd,  $J = 17.1, 7.0$  Hz, 1H), 2.77 – 2.67 (m, 1H), 1.67 – 1.53 (m, 3H), 1.50 – 1.40 (m, 2H), 1.22 – 1.13 (m, 1H), 1.08 – 1.00 (m, 3H), 0.96 – 0.85 (m, 2H);  $^{13}\text{C}$  NMR (101 MHz,  $\text{CDCl}_3$ ):  $\delta$  200.6, 168.0, 143.9, 139.7, 137.5, 136.7, 132.7, 131.4, 130.2, 129.3, 128.8, 128.7, 128.4, 128.3, 128.2, 128.1, 127.6, 120.4, 66.2, 47.8, 40.0, 37.3, 31.5, 30.2, 26.8, 26.7, 26.6; **IR (ATR)**: 2922, 2850, 1682, 1622, 1597, 1577, 1485, 1446, 1072, 1010, 908, 824, 752, 732, 691  $\text{cm}^{-1}$ ; **HRMS (ESI)** calculated for  $\text{C}_{35}\text{H}_{35}\text{BrNO}^+$   $[\text{M}+\text{H}^+]$ : 564.1897, found: 564.1897.

### 3-cyclohexyl-4-((diphenylmethylene)amino)-4-(4-fluorophenyl)-1-phenylbutan-1-one (3ha)

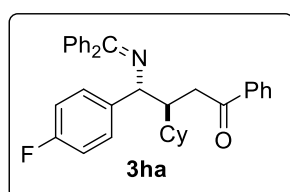

The preparation of **3ha** was followed according to General Procedure C.  $^1\text{H}$  NMR analysis of the crude revealed a 3:1 mixture of anti and syn isomer. **3ha** was isolated as a white solid (95 mg, 94% combined) consisting of two diastereomers (4:1 isolated dr).

Analytical sample of the major isomer was obtained via further recrystallization in MeOH for characterization.

$R_f = 0.38$  [0.5% triethylamine in petroleum ether].

$^1\text{H}$  NMR (400 MHz,  $\text{CDCl}_3$ ):  $\delta$  7.86 (d,  $J = 7.6$  Hz, 2H), 7.64 (d,  $J = 7.3$  Hz, 2H), 7.49 (t,  $J = 7.3$  Hz, 1H), 7.42 – 7.32 (m, 8H), 7.18 (dd,  $J = 8.7, 5.6$  Hz, 2H), 6.96 – 6.88 (m, 4H), 4.61 (d,  $J = 4.9$  Hz, 1H), 3.21 (dd,  $J = 16.9, 4.4$  Hz, 1H), 3.10 (dd,  $J = 17.2, 6.9$  Hz, 1H), 2.78 – 2.67 (m, 1H), 1.62 – 1.56 (m, 3H), 1.49 – 1.41 (m, 2H), 1.20 – 1.13 (m, 1H), 1.08 – 0.99 (m, 3H), 0.95 – 0.85 (m, 2H);  $^{13}\text{C}$  NMR (101 MHz,  $\text{CDCl}_3$ ):  $\delta$  200.7, 167.7, 161.5 (d,  $J = 242.0$  Hz), 140.5 (d,  $J = 3.3$  Hz), 139.8, 137.5, 136.8, 132.6, 130.2, 129.0 (d,  $J = 7.8$  Hz), 128.8, 128.6, 128.4, 128.32, 128.25, 128.23, 128.1, 127.7, 115.1 (d,  $J = 21.1$  Hz), 66.1, 47.9, 40.0, 37.4, 31.5, 30.2, 26.9, 26.8, 26.7;  $^{19}\text{F}$  NMR (376 MHz,  $\text{CDCl}_3$ )  $\delta$  -116.5; **IR (ATR)**: 2923, 2850, 1683, 1597, 1506, 1446, 1314, 1274, 1220, 1155, 1002, 834, 753, 732, 692  $\text{cm}^{-1}$ ; **HRMS (ESI)** calculated for  $\text{C}_{35}\text{H}_{34}\text{FNO}^+$   $[\text{M}+\text{Na}^+]$ : 526.2517, found: 526.2518.

### 4-(2-chlorophenyl)-3-cyclohexyl-4-((diphenylmethylene)amino)-1-phenylbutan-1-one (3ia)

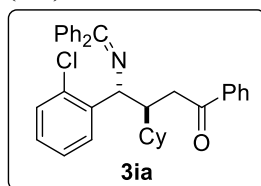

The preparation of **3ia** was followed according to General Procedure C.  $^1\text{H}$  NMR analysis of the crude revealed a 2:1 mixture of anti and syn isomer. **3ia** was isolated as a white solid (99 mg, 95% combined) consisting of two diastereomers (2:1 isolated dr).

$R_f = 0.28$  [0.5% triethylamine in petroleum ether].

These reported data are for the mixture of diastereomers. **<sup>1</sup>H NMR** (400 MHz, CDCl<sub>3</sub>): δ 7.80 (d, *J* = 8.1 Hz, 5H), 7.74 – 7.67 (m, 6H), 7.64 (d, *J* = 8.3 Hz, 2H), 7.62 – 7.58 (m, 2H), 7.51 – 7.21 (m, 29H), 7.16 – 7.08 (m, 4H), 6.99 – 6.88 (m, 9H), 5.10 (d, *J* = 3.7 Hz, 2H), 4.92 (d, *J* = 8.8 Hz, 1H), 3.49 (dd, *J* = 17.1, 4.4 Hz, 2H), 3.19 (dd, *J* = 17.1, 7.3 Hz, 2H), 3.10 – 3.00 (m, 1H), 2.93 (dd, *J* = 16.7, 6.9 Hz, 1H), 2.76 (m, *J* = 7.5, 4.3 Hz, 2H), 2.62 (dd, *J* = 16.7, 5.0 Hz, 1H), 1.70 – 1.54 (m, 15H), 1.28 – 1.20 (m, 3H), 1.13 – 0.90 (m, 15H); **<sup>13</sup>C NMR** (101 MHz, CDCl<sub>3</sub>): δ 200.8, 200.0, 168.2, 167.8, 142.7, 141.1, 140.1, 139.9, 137.6, 137.3, 137.2, 137.0, 132.6, 132.5, 131.7, 130.2, 130.12, 130.09, 129.5, 129.0, 128.9, 128.8, 128.6, 128.5, 128.4, 128.19, 128.18, 128.1, 128.0, 127.82, 127.78, 127.7, 127.6, 127.0, 126.7, 63.3, 63.0, 47.6, 45.4, 40.7, 38.9, 37.2, 35.5, 32.6, 31.0, 30.9, 27.7, 27.2, 27.0, 26.90, 26.87, 26.85, 26.7; **IR (ATR)**: 2923, 2850, 1683, 1617, 1597, 1446, 1314, 1272, 1215, 1030, 1002, 908, 750, 734, 692 cm<sup>-1</sup>; **HRMS (ESI)** calculated for C<sub>35</sub>H<sub>34</sub>ClNONa<sup>+</sup> [*M*+Na<sup>+</sup>]: 542.2221, found: 542.2211.

**4-(3-chlorophenyl)-3-cyclohexyl-4-((diphenylmethylene)amino)-1-phenylbutan-1-one (3ja)**

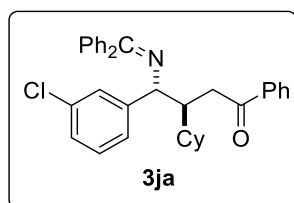

The preparation of **3ja** was followed according to General Procedure C. <sup>1</sup>H NMR analysis of the crude revealed a 2:1 mixture of anti and syn isomer. **3ja** was isolated as a white solid (82 mg, 79% combined) consisting of two diastereomers (2:1 isolated dr). *R<sub>f</sub>* = 0.20 [0.5% triethylamine in petroleum ether].

These reported data are for the mixture of diastereomers. **<sup>1</sup>H NMR** (400 MHz, CDCl<sub>3</sub>): δ 7.85 (d, *J* = 7.0 Hz, 1H), 7.71 – 7.61 (m, 2H), 7.51 – 7.46 (m, 1H), 7.44 – 7.30 (m, 9H), 7.26 – 7.05 (m, 4H), 6.91 (dd, *J* = 13.2, 6.8 Hz, 2H), 4.61 (d, *J* = 4.7 Hz, 0.6H), 4.35 (d, *J* = 7.2 Hz, 0.4H), 3.21 (dd, *J* = 17.1, 4.4 Hz, 0.6H), 3.12 (dd, *J* = 17.1, 7.0 Hz, 0.6H), 2.95 – 2.82 (m, 0.8H), 2.74 – 2.68 (m, 0.6H), 2.65 (dd, *J* = 16.3, 4.7 Hz, 0.4H), 1.62 – 1.55 (m, 4H), 1.46 – 1.41 (m, 1H), 1.21 – 1.15 (m, 1H), 1.11 – 0.98 (m, 3H), 0.95 – 0.84 (m, 2H); **<sup>13</sup>C NMR** (101 MHz, CDCl<sub>3</sub>): δ 200.5, 200.0, 168.1, 167.4, 147.0, 145.6, 139.8, 139.7, 137.5, 137.4, 136.8, 136.7, 134.2, 134.0, 132.6, 130.3, 130.2, 129.6, 129.5, 128.8, 128.74, 128.73, 128.59, 128.56, 128.5, 128.39, 128.37, 128.31, 128.25, 128.2, 128.1, 128.0, 127.8, 127.68, 127.65, 127.1, 126.9, 126.7, 126.6, 125.8, 67.8, 66.4, 47.9, 47.1, 40.1, 38.6, 37.3, 36.7, 32.6, 31.5, 30.3, 28.5, 27.0, 26.9, 26.82, 26.77, 26.6; **IR (ATR)**: 2922, 2850, 1682, 1622, 1595, 1576, 1446, 1314, 1272, 1179, 1001, 782, 753, 690 cm<sup>-1</sup>; **HRMS (ESI)** calculated for C<sub>35</sub>H<sub>34</sub>ClNONa<sup>+</sup> [*M*+Na<sup>+</sup>]: 542.2221, found: 542.2215.

**3-cyclohexyl-4-((diphenylmethylene)amino)-4-(naphthalen-2-yl)-1-phenylbutan-1-one (3ma)**



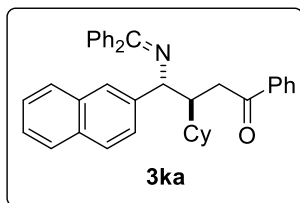

The preparation of **3ka** was followed according to General Procedure C.  $^1\text{H}$  NMR analysis of the crude revealed a 5:1 mixture of anti and syn isomer. **3ka** was isolated as a white solid (90 mg, 84% combined) consisting of two diastereomers (5:1 isolated dr).

Analytical sample of the major isomer was obtained via further recrystallization in MeOH for characterization.

$R_f$  = 0.17 [0.5% triethylamine in petroleum ether].

$^1\text{H}$  NMR (400 MHz,  $\text{CDCl}_3$ ):  $\delta$  7.84 – 7.76 (m, 4H), 7.76 – 7.69 (m, 3H), 7.67 – 7.61 (m, 1H), 7.46 – 7.40 (m, 6H), 7.40 – 7.30 (m, 6H), 6.98 (d,  $J$  = 7.2 Hz, 2H), 4.85 (d,  $J$  = 4.8 Hz, 1H), 3.32 (dd,  $J$  = 17.1, 4.3 Hz, 1H), 3.27 – 3.17 (m, 1H), 2.94 – 2.76 (m, 1H), 1.70 – 1.59 (m, 3H), 1.57 – 1.50 (m, 2H), 1.30 – 1.23 (m, 1H), 1.10 – 1.02 (m, 3H), 1.02 – 0.90 (m, 2H);  $^{13}\text{C}$  NMR (101 MHz,  $\text{CDCl}_3$ ):  $\delta$  200.9, 167.9, 142.5, 140.0, 137.5, 136.9, 133.5, 132.6, 132.5, 130.2, 128.9, 128.7, 128.4, 128.3, 128.2, 128.1, 128.0, 127.8, 127.7, 126.2, 126.0, 125.9, 125.5, 66.9, 47.8, 40.3, 37.5, 31.5, 30.5, 26.9, 26.8, 26.7; IR (ATR): 2922, 2849, 1683, 1622, 1597, 1446, 1270, 1002, 779, 748, 691, 641  $\text{cm}^{-1}$ ; HRMS (ESI) calculated for  $\text{C}_{39}\text{H}_{37}\text{NONa}^+$  [ $\text{M}+\text{Na}^+$ ]: 558.2767, found: 558.2755.

### 3-cyclohexyl-4-((diphenylmethylene)amino)-1-phenyl-4-(thiophen-2-yl)butan-1-one (3ka)

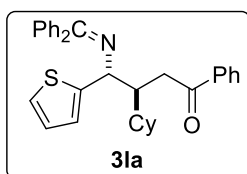

The preparation of **3la** was followed according to General Procedure C.  $^1\text{H}$  NMR analysis of the crude revealed a 3:1 mixture of anti and syn isomer. **3la** was isolated as a white solid (87 mg, 88% combined) consisting of two diastereomers (3:1 isolated dr).

$R_f$  = 0.40 [0.5% triethylamine in petroleum ether].

These reported data are for the mixture of diastereomers.  $^1\text{H}$  NMR (400 MHz,  $\text{CDCl}_3$ ):  $\delta$  7.93 (d,  $J$  = 7.0 Hz, 6H), 7.86 (d,  $J$  = 7.0 Hz, 2H), 7.71 (d,  $J$  = 6.8 Hz, 6H), 7.63 (d,  $J$  = 7.0 Hz, 2H), 7.51 (t,  $J$  = 7.4 Hz, 4H), 7.46 – 7.33 (m, 30H), 7.30 (t,  $J$  = 7.4 Hz, 2H), 7.21 (d,  $J$  = 5.1 Hz, 1H), 7.15 (d,  $J$  = 5.0 Hz, 3H), 7.13 – 7.06 (m, 8H), 6.92 (dd,  $J$  = 5.0 Hz, 3H), 6.90 (dd,  $J$  = 5.2 Hz, 1H), 6.84 (d,  $J$  = 3.5 Hz, 3H), 6.79 (d,  $J$  = 3.5 Hz, 1H), 4.96 (d,  $J$  = 3.7 Hz, 3H), 4.89 (d,  $J$  = 5.8 Hz, 1H), 3.43 – 3.29 (m, 4H), 3.24 (dd,  $J$  = 7.6 Hz, 3H), 2.82 – 2.68 (m, 5H), 1.70 – 1.53 (m, 13H), 1.50 – 1.40 (m, 7H), 1.30 – 1.19 (m, 4H), 1.15 – 1.00 (m, 11H), 1.01 – 0.82 (m, 9H);  $^{13}\text{C}$  NMR (101 MHz,  $\text{CDCl}_3$ ):  $\delta$  200.5, 200.0, 168.4, 167.0, 148.2, 146.5, 139.8, 139.6, 137.6, 137.5, 136.5, 132.62, 132.59, 130.3, 130.1, 128.9, 128.8, 128.7, 128.6, 128.5, 128.41, 128.36, 128.3, 128.22, 128.15, 128.1, 127.73, 127.71, 126.6, 126.1, 124.3, 123.9, 123.8, 123.4, 63.5, 63.3, 48.2, 47.0, 40.1, 39.2, 37.7, 37.1, 32.1, 31.5, 30.4, 29.4, 26.9, 26.8, 26.71, 26.66, 26.6; IR (ATR): 2922, 2847, 1615, 1494, 1446, 1343, 1266, 1024, 759, 695, 639  $\text{cm}^{-1}$ ; HRMS (ESI)

calculated for  $C_{33}H_{34}NOS^+$   $[M+H]^+$ : 492.2330, found: 492.2330.

### 3-cyclohexyl-4-((diphenylmethylene)amino)-4-(furan-2-yl)-1-phenylbutan-1-one (3la)

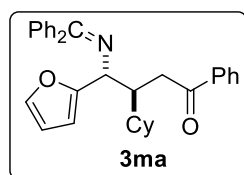

The preparation of **3ma** was followed according to General Procedure C.  $^1H$  NMR analysis of the crude revealed a 5:1 mixture of anti and syn isomer. **3ma** was isolated as a brown liquid (66 mg, 69%) and was diastereoisomeric pure.

$R_f$  = 0.22 [0.5% triethylamine in petroleum ether].

$^1H$  NMR (400 MHz,  $CDCl_3$ ):  $\delta$  7.94 (d,  $J$  = 7.1 Hz, 2H), 7.68 (d,  $J$  = 6.9 Hz, 2H), 7.52 (t,  $J$  = 7.4 Hz, 1H), 7.47 – 7.39 (m, 6H), 7.39 – 7.30 (m, 3H), 7.14 (dd,  $J$  = 6.6, 3.0 Hz, 2H), 6.27 – 6.19 (m, 1H), 6.10 (d,  $J$  = 3.2 Hz, 1H), 4.77 (d,  $J$  = 3.5 Hz, 1H), 3.44 (dd,  $J$  = 17.5, 3.7 Hz, 1H), 3.20 (dd,  $J$  = 17.5, 7.6 Hz, 1H), 2.91 – 2.78 (m, 1H), 1.65 – 1.53 (m, 3H), 1.48 – 1.41 (m, 2H), 1.22 – 1.16 (m, 1H), 1.10 – 1.00 (m, 3H), 0.91 – 0.83 (m, 2H);  $^{13}C$  NMR (101 MHz,  $CDCl_3$ ):  $\delta$  200.5, 169.4, 156.3, 141.4, 140.0, 137.6, 136.6, 132.7, 130.3, 128.9, 128.8, 128.5, 128.4, 128.3, 128.2, 127.9, 110.1, 106.6, 61.7, 44.4, 40.2, 38.0, 31.2, 30.7, 26.9, 26.7, 26.6; IR (ATR): 2921, 2851, 1683, 1623, 1447, 1282, 1002, 766, 751, 730, 698, 687  $cm^{-1}$ ; HRMS (ESI) calculated for  $C_{33}H_{33}NO_2Na^+$   $[M+Na]^+$ : 498.2403, found: 498.2397.

### 3-(((diphenylmethylene)amino)(phenyl)methyl)-1-phenylheptan-1-one (3ab)

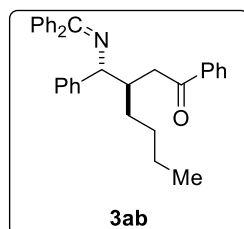

The preparation of **3ab** was followed according to General Procedure C.  $^1H$  NMR analysis of the crude revealed a 2:1 mixture of anti and syn isomer. **3ab** was isolated as a white solid (87 mg, 95% combined) consisting of two diastereomers (2:1 isolated dr). Analytical sample of the major isomer was obtained via further recrystallization in MeOH for characterization.

$R_f$  = 0.25 [0.5% triethylamine in petroleum ether].

$^1H$  NMR (400 MHz,  $CDCl_3$ ):  $\delta$  7.82 (d,  $J$  = 8.1 Hz, 2H), 7.76 (d,  $J$  = 7.8 Hz, 2H), 7.51 (t,  $J$  = 7.2 Hz, 1H), 7.45 – 7.33 (m, 8H), 7.33 – 7.26 (m, 4H), 7.25 – 7.20 (m, 1H), 7.00 (d,  $J$  = 7.3 Hz, 2H), 4.59 (d,  $J$  = 4.4 Hz, 1H), 3.33 (dd,  $J$  = 16.3, 3.5 Hz, 1H), 3.07 (dd,  $J$  = 16.2, 9.0 Hz, 1H), 2.76 – 2.51 (m, 1H), 1.33 – 1.21 (m, 2H), 1.20 – 1.10 (m, 2H), 1.11 – 0.96 (m, 2H), 0.77 (t,  $J$  = 7.3 Hz, 3H);  $^{13}C$  NMR (101 MHz,  $CDCl_3$ ):  $\delta$  201.0, 168.0, 144.3, 140.0, 137.4, 136.7, 132.7, 130.1, 128.8, 128.5, 128.4, 128.32, 128.30, 128.2, 127.9, 127.6, 126.7, 67.5, 43.2, 39.8, 31.8, 29.2, 23.0, 14.1; IR (ATR): 2950, 2928, 2858, 1683, 1447, 1314, 1289, 1178, 1028, 1001, 774, 747, 696  $cm^{-1}$ ; HRMS (ESI) calculated for  $C_{33}H_{33}NONa^+$   $[M+Na]^+$ : 482.2454, found: 482.2450.

### 3-(((diphenylmethylene)amino)(phenyl)methyl)-5-methyl-1-phenylhexan-1-one (3ac)

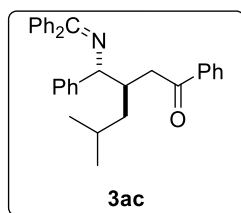

The preparation of **3ac** was followed according to General Procedure C.  $^1\text{H}$  NMR analysis of the crude revealed a 2.6:1 mixture of anti and syn isomer. **3ac** was isolated as yellow solid (78 mg, 85% combined) consisting of two diastereomers (2:1 isolated dr). Analytical sample of the major isomer was obtained via further recrystallization in MeOH for characterization.

$R_f = 0.30$  [0.5% triethylamine in petroleum ether].

$^1\text{H}$  NMR (400 MHz,  $\text{CDCl}_3$ ):  $\delta$  7.77 (d,  $J = 7.4$  Hz, 2H), 7.73 (d,  $J = 6.9$  Hz, 2H), 7.49 (t,  $J = 7.5$  Hz, 1H), 7.43 – 7.33 (m, 8H), 7.28 (d,  $J = 4.4$  Hz, 4H), 7.24 – 7.19 (m, 1H), 6.95 (d,  $J = 6.8$  Hz, 2H), 4.53 (d,  $J = 4.0$  Hz, 1H), 3.31 (dd,  $J = 16.2, 3.7$  Hz, 1H), 3.03 (dd,  $J = 16.2, 8.8$  Hz, 1H), 2.78 – 2.61 (m, 1H), 1.34 – 1.04 (m, 3H), 0.75 (d,  $J = 6.3$  Hz, 3H), 0.72 (d,  $J = 6.3$  Hz, 3H);  $^{13}\text{C}$  NMR (101 MHz,  $\text{CDCl}_3$ ):  $\delta$  201.1, 168.0, 144.4, 140.1, 137.5, 136.7, 132.7, 130.2, 128.8, 128.6, 128.5, 128.3, 128.2, 128.1, 127.9, 127.6, 126.7, 67.6, 41.6, 40.9, 40.0, 25.1, 23.2, 22.3; IR (ATR): 2954, 2870, 1679, 1623, 1599, 1445, 1313, 1272, 1027, 1005, 775, 746, 692  $\text{cm}^{-1}$ ; HRMS (ESI) calculated for  $\text{C}_{33}\text{H}_{33}\text{NONa}^+$  [ $\text{M}+\text{Na}^+$ ]: 482.2454, found: 482.2453.

### 3-cyclohexyl-4-((diphenylmethylene)amino)-1-phenyl-4-(*p*-tolyl)butan-1-one (3ad)

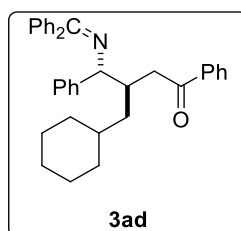

The preparation of **3ad** was followed according to General Procedure C.  $^1\text{H}$  NMR analysis of the crude revealed a 2:1 mixture of anti and syn isomer. **3ad** was isolated as a yellow solid (83 mg, 83% combined) consisting of two diastereomers (2:1 isolated dr). Analytical sample of the major isomer was obtained via further recrystallization in MeOH for characterization of the major isomer.

$R_f = 0.30$  [0.5% triethylamine in petroleum ether].

$^1\text{H}$  NMR (400 MHz,  $\text{CDCl}_3$ ):  $\delta$  7.74 (dd,  $J = 12.1, 6.9$  Hz, 4H), 7.48 (t,  $J = 7.4$  Hz, 1H), 7.45 – 7.32 (m, 9H), 7.29 – 7.27 (m, 3H), 7.24 – 7.19 (m, 1H), 6.96 (d,  $J = 7.1$  Hz, 2H), 4.54 (d,  $J = 3.7$  Hz, 1H), 3.28 (dd,  $J = 16.2, 3.3$  Hz, 1H), 3.03 (dd,  $J = 16.2, 9.1$  Hz, 1H), 2.80 – 2.60 (m, 1H), 1.65 – 1.43 (m, 3H), 1.31 – 1.22 (m, 1H), 1.19 – 1.09 (m, 2H), 1.06 – 0.94 (m, 3H), 0.93 – 0.81 (m, 2H), 0.76 – 0.63 (m, 2H);  $^{13}\text{C}$  NMR (101 MHz,  $\text{CDCl}_3$ ):  $\delta$  201.0, 168.0, 144.4, 140.0, 137.4, 136.5, 132.6, 130.0, 128.7, 128.5, 128.4, 128.2, 128.1, 128.0, 127.9, 127.4, 126.6, 67.1, 39.9, 39.8, 34.3, 334.0, 32.7, 26.6, 26.3, 26.2; IR (ATR): 2919, 2848, 1685, 1623, 1597, 1490, 1447, 1315, 1290, 1026, 1001, 783, 752, 743, 691  $\text{cm}^{-1}$ ; HRMS (ESI) calculated for  $\text{C}_{36}\text{H}_{38}\text{NO}^+$  [ $\text{M}+\text{H}^+$ ]: 500.2948, found: 500.2948.

### 3-cyclopropyl-4-((diphenylmethylene)amino)-1,4-diphenylbutan-1-one (3ae)

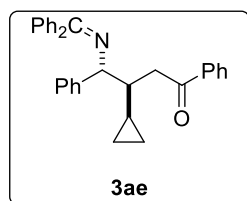

The preparation of **3ae** was followed according to General Procedure C.  $^1\text{H}$  NMR analysis of the crude revealed a 3:1 mixture of anti and syn isomer. **3ae** was isolated as a yellow oil (74 mg, 83% combined) consisting of two diastereomers (3:1 isolated dr). Analytical sample of the major isomer was obtained via further recrystallization in MeOH for characterization of the major isomer.

$^1\text{H}$  NMR (400 MHz,  $\text{CDCl}_3$ ):  $\delta$  7.84 (d,  $J$  = 7.6 Hz, 2H), 7.80 (d,  $J$  = 7.1 Hz, 2H), 7.53 (t,  $J$  = 7.4 Hz, 1H), 7.47 – 7.36 (m, 8H), 7.34 – 7.27 (m, 4H), 7.25 – 7.19 (m, 1H), 7.02 (d,  $J$  = 6.8 Hz, 2H), 4.65 (d,  $J$  = 4.6 Hz, 1H), 3.34 (dd,  $J$  = 14.9, 4.0 Hz, 1H), 3.25 (dd,  $J$  = 14.8, 9.0 Hz, 1H), 1.96 – 1.78 (m, 1H), 0.78 – 0.55 (m, 1H), 0.38 – 0.26 (m, 1H), 0.19 – 0.10 (m, 1H), 0.07 – 0.05 (m, 1H), -0.11 – -0.29 (m, 1H);  $^{13}\text{C}$  NMR (101 MHz,  $\text{CDCl}_3$ ):  $\delta$  201.4, 167.9, 144.0, 140.0, 137.6, 136.8, 132.6, 130.2, 128.7, 128.5, 128.42, 128.39, 128.3, 128.22, 128.18, 127.9, 127.6, 126.7, 69.9, 49.6, 40.5, 15.0, 5.1, 4.5.; IR (ATR): 2992, 1684, 1624, 1447, 1917, 1002, 778, 745, 697  $\text{cm}^{-1}$ ; HRMS (ESI) calculated for  $\text{C}_{32}\text{H}_{29}\text{NONa}^+$  [ $\text{M}+\text{Na}^+$ ]: 466.2141, found: 466.2144.

### 3-cyclopentyl-4-((diphenylmethylene)amino)-1,4-diphenylbutan-1-one (3af)

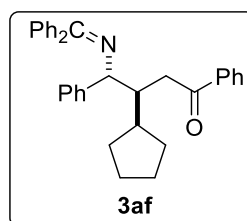

The preparation of **3af** was followed according to General Procedure C.  $^1\text{H}$  NMR analysis of the crude revealed a 4:1 mixture of anti and syn isomer. **3af** was isolated as white solid (90 mg, 95% combined) consisting of two diastereomers (4:1 isolated dr). A single crystal sample was used for characterization.

$R_f$  = 0.20 [0.5% triethylamine in petroleum ether].

$^1\text{H}$  NMR (400 MHz,  $\text{CDCl}_3$ ):  $\delta$  7.76 (d,  $J$  = 7.7 Hz, 2H), 7.71 (d,  $J$  = 8.2 Hz, 2H), 7.47 (t,  $J$  = 7.4 Hz, 1H), 7.45 – 7.30 (m, 8H), 7.25 – 7.20 (m, 4H), 7.19 – 7.14 (m, 1H), 6.96 (d,  $J$  = 7.3 Hz, 2H), 4.63 (d,  $J$  = 3.3 Hz, 1H), 3.49 (dd,  $J$  = 17.3, 3.7 Hz, 1H), 3.10 (dd,  $J$  = 17.3, 6.8 Hz, 1H), 2.79 – 2.67 (m, 1H), 1.77 – 1.69 (m, 1H), 1.61 – 1.48 (m, 3H), 1.46 – 1.35 (m, 3H), 1.11 – 0.98 (m, 2H);  $^{13}\text{C}$  NMR (101 MHz,  $\text{CDCl}_3$ ):  $\delta$  201.0, 167.7, 144.7, 140.1, 137.7, 136.6, 132.5, 130.1, 128.8, 128.6, 128.4, 128.3, 128.22, 128.20, 128.1, 127.9, 127.5, 126.6, 68.2, 47.5, 44.0, 38.7, 31.2, 30.7, 25.3, 24.9; IR (ATR): 2950, 2867, 1683, 1490, 1446, 1315, 1290, 1209, 1002, 779, 759, 750, 699, 689  $\text{cm}^{-1}$ ; HRMS (ESI) calculated for  $\text{C}_{34}\text{H}_{34}\text{NO}^+$  [ $\text{M}+\text{H}^+$ ]: 472.2635, found: 472.2635.

### 3-cyclohexyl-4-((diphenylmethylene)amino)-1-phenyl-4-(*p*-tolyl)butan-1-one (3ag)

The preparation of **3ag** was followed according to General Procedure C.  $^1\text{H}$  NMR analysis of

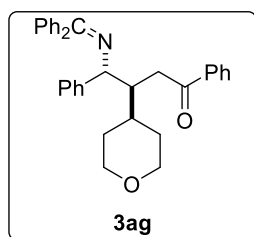

the crude revealed a 5:1 mixture of anti and syn isomer. **3ag** was isolated as a white solid (89 mg, 91%) and consisting of two diastereomers (5:1 isolated dr). A small amount of diastereoisomeric mixture (< 30 mg) was further purified by preparative TLC (0.5% triethylamine in petroleum ether) to obtain the major isomer for characterization.

$R_f$  = 0.40 [5% ethyl acetate in petroleum ether (containing 0.5% triethylamine)].

**$^1\text{H}$  NMR** (400 MHz,  $\text{CDCl}_3$ ):  $\delta$  7.81 (d,  $J$  = 7.3 Hz, 2H), 7.67 (d,  $J$  = 8.3 Hz, 2H), 7.48 (t,  $J$  = 7.1 Hz, 1H), 7.47 – 7.29 (m, 9H), 7.28 – 7.23 (m, 3H), 7.21 – 7.10 (m, 1H), 6.94 (d,  $J$  = 7.5 Hz, 2H), 4.67 (d,  $J$  = 4.4 Hz, 1H), 3.92 – 3.71 (m, 2H), 3.33 (dd,  $J$  = 17.1, 3.8 Hz, 1H), 3.26 – 3.08 (m, 3H), 2.85 – 2.69 (m, 1H), 1.58 – 1.42 (m, 1H), 1.37 – 1.22 (m, 4H);  **$^{13}\text{C}$  NMR** (101 MHz,  $\text{CDCl}_3$ ):  $\delta$  200.4, 167.8, 144.4, 139.8, 137.4, 136.6, 132.7, 130.2, 128.8, 128.7, 128.5, 128.4, 128.3, 128.2, 128.1, 127.8, 127.5, 126.8, 68.4, 68.3, 66.0, 47.2, 37.8, 37.1, 31.4, 30.6; **IR (ATR)**: 2916, 2835, 1683, 1445, 1316, 1243, 1001, 778, 753, 691, 659, 640, 606, 564, 53  $\text{cm}^{-1}$ ; **HRMS (ESI)** calculated for  $\text{C}_{34}\text{H}_{34}\text{NO}_2^+$  [ $\text{M}+\text{H}^+$ ]: 488.2584, found: 488.2584.

#### 6-((tert-butyldimethylsilyl)oxy)-3-(((diphenylmethylene)amino)(phenyl)methyl)-1-phenylhexan-1-one (**3ah**)

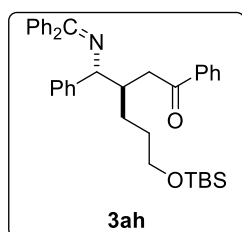

The preparation of **3ah** was followed according to General Procedure C.  $^1\text{H}$  NMR analysis of the crude revealed a 3:1 mixture of anti and syn isomer. **3ah** was isolated as a yellow liquid (85 mg, 74% combined) consisting of two diastereomers (2:1 isolated dr).  $R_f$  = 0.22 [0.5% triethylamine in petroleum ether].

These reported data are for the mixture of diastereomers.  **$^1\text{H}$  NMR** (400 MHz,  $\text{CDCl}_3$ ):  $\delta$  7.91 – 7.83 (m, 2H), 7.80 – 7.73 (m, 2H), 7.62 – 7.53 (m, 1H), 7.49 – 7.37 (m, 8H), 7.37 – 7.29 (m, 4H), 7.30 – 7.23 (m, 1H), 7.03 (d,  $J$  = 6.1 Hz, 1.4H), 6.95 (d,  $J$  = 7.0 Hz, 0.6H), 4.58 (d,  $J$  = 4.8 Hz, 0.7H), 4.53 (d,  $J$  = 4.9 Hz, 0.3H), 3.56 (t,  $J$  = 6.1 Hz, 0.7H), 3.53 – 3.46 (m, 1.3H), 3.35 (dd,  $J$  = 16.2, 3.7 Hz, 0.7H), 3.29 – 3.18 (m, 0.3H), 3.09 (dd,  $J$  = 16.2, 8.8 Hz, 0.7H), 2.78 – 2.66 (m, 1.3H), 1.77 – 1.27 (m, 4H), 0.91 (s, 2.7H), 0.88 (s, 6.3H), 0.05 (s, 1.8H), 0.01 (s, 4.2H);  **$^{13}\text{C}$  NMR** (101 MHz,  $\text{CDCl}_3$ ):  $\delta$  200.9, 200.2, 168.1, 167.3, 144.1, 143.3, 140.0, 137.4, 136.81, 136.76, 132.8, 132.7, 130.1, 130.0, 128.8, 128.7, 128.54, 128.51, 128.49, 128.34, 128.31, 128.22, 128.20, 128.14, 128.10, 127.9, 127.73, 127.66, 126.82, 126.75, 68.3, 67.9, 63.5, 63.4, 42.9, 42.2, 40.1, 39.8, 30.5, 30.3, 28.3, 26.8, 26.08, 26.06, 18.4, 18.4, -5.17, -5.19, -5.22; **IR (ATR)**: 2927, 2855, 1683, 1447, 1254, 1096, 1002, 833, 774, 750, 694  $\text{cm}^{-1}$ ; **HRMS (ESI)** calculated for  $\text{C}_{38}\text{H}_{45}\text{NO}_2\text{SiNa}^+$  [ $\text{M}+\text{Na}^+$ ]: 598.3112, found: 598.3107.

### 6-(benzylthio)-3-(((diphenylmethylene)amino)(phenyl)methyl)-1-phenylhexan-1-one (3ai)

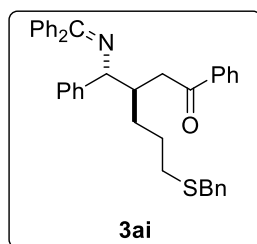

The preparation of **3ai** was followed according to General Procedure C.  $^1\text{H}$  NMR analysis of the crude revealed a 4:1 mixture of anti and syn isomer. **3ai** was isolated as a pale-yellow liquid (69 mg, 61% combined) consisting of two diastereomers (2:1 isolated dr).

$R_f$  = 0.52 [5% ethyl acetate in petroleum ether (containing 0.5% triethylamine)].

These reported data are for the mixture of diastereomers.  $^1\text{H}$  NMR (400 MHz,  $\text{CDCl}_3$ ):  $\delta$  7.82 (d,  $J$  = 7.2 Hz, 2H), 7.75 – 7.66 (m, 2H), 7.61 – 7.46 (m, 2H), 7.44 – 7.34 (m, 8H), 7.32 – 7.27 (m, 3H), 7.25 – 7.19 (m, 6H), 6.96 (d,  $J$  = 6.4 Hz, 1.2H), 6.88 (d,  $J$  = 6.9 Hz, 0.8H), 4.50 (d,  $J$  = 4.7 Hz, 0.6H), 4.44 (d,  $J$  = 5.1 Hz, 0.3H), 3.60 (s, 0.8H), 3.57 (s, 1.2H), 3.28 (dd,  $J$  = 16.4, 3.5 Hz, 0.6H), 3.17 (dd,  $J$  = 15.8, 4.7 Hz, 0.4H), 3.00 (dd,  $J$  = 16.3, 9.0 Hz, 0.6H), 2.71 – 2.57 (m, 1.4H), 2.32 – 2.22 (m, 2H), 1.45 – 1.27 (m, 4H);  $^{13}\text{C}$  NMR (101 MHz,  $\text{CDCl}_3$ ):  $\delta$  200.7, 200.0, 168.1, 167.4, 144.0, 143.2, 139.9, 138.70, 138.67, 137.3, 136.74, 136.68, 132.9, 132.8, 131.1, 130.2, 130.1, 129.4, 129.3, 128.93, 128.91, 128.8, 128.7, 128.64, 128.60, 128.55, 128.52, 128.45, 128.41, 128.38, 128.37, 128.30, 128.26, 128.20, 128.18, 128.15, 128.1, 127.8, 127.70, 127.65, 126.9, 126.8, 68.4, 67.8, 42.7, 42.0, 40.2, 39.8, 36.3, 31.6, 31.5, 31.4, 30.0, 27.1, 26.9; IR (ATR): 2920, 2848, 1674, 1624, 1446, 1277, 1123, 821, 744, 696  $\text{cm}^{-1}$ ; HRMS (ESI) calculated for  $\text{C}_{39}\text{H}_{37}\text{NOSNa}^+$  [ $\text{M}+\text{Na}^+$ ]: 590.2488, found: 590.2488.

### 4-(((diphenylmethylene)amino)-1,3,4-triphenylbutan-1-one (3aj)

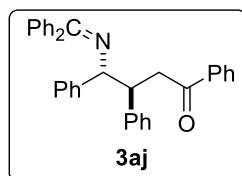

The preparation of **3aj** was followed according to General Procedure C.  $^1\text{H}$  NMR analysis of the crude revealed a 9:1 mixture of anti and syn isomer. **3aj** was isolated as a yellow liquid (69 mg, 72%) and was diastereoisomeric pure.

$R_f$  = 0.30 [0.5% triethylamine in petroleum ether].

$^1\text{H}$  NMR (400 MHz,  $\text{CDCl}_3$ ):  $\delta$  7.85 (d,  $J$  = 7.2 Hz, 2H), 7.73 (d,  $J$  = 6.8 Hz, 2H), 7.49 (t,  $J$  = 7.4 Hz, 1H), 7.42 – 7.37 (m, 4H), 7.36 – 7.31 (m, 2H), 7.30 – 7.20 (m, 6H), 7.19 – 7.13 (m, 1H), 7.13 – 7.08 (m, 3H), 7.06 – 7.02 (m, 2H), 6.54 (d,  $J$  = 7.3 Hz, 2H), 4.60 (d,  $J$  = 5.5 Hz, 1H), 4.03 – 3.95 (m, 1H), 3.74 (dd,  $J$  = 16.8, 10.3 Hz, 1H), 3.50 (dd,  $J$  = 16.9, 3.8 Hz, 1H);  $^{13}\text{C}$  NMR (101 MHz,  $\text{CDCl}_3$ ):  $\delta$  199.4, 168.1, 143.3, 142.1, 139.7, 137.4, 136.7, 132.8, 130.2, 128.7, 128.7, 128.5, 128.2, 128.2, 128.1, 127.6, 127.4, 126.8, 126.4, 71.1, 49.8, 39.4; HRMS (ESI) calculated for  $\text{C}_{35}\text{H}_{30}\text{NO}^+$  [ $\text{M}+\text{H}^+$ ]: 480.2322, found: 480.2325.

### 3-cyclohexyl-4-(((diphenylmethylene)amino)-4-phenyl-1-(p-tolyl)butan-1-one (3ak)

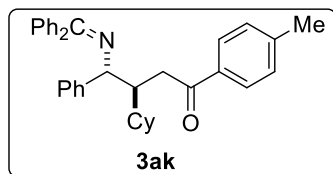

The preparation of **3ak** was followed according to General Procedure C. <sup>1</sup>H NMR analysis of the crude revealed a 5:1 mixture of anti and syn isomer. **3ak** was isolated as a yellow solid (85 mg, 85% combined) consisting of two diastereomers (4:1 isolated dr). Analytical sample of the major isomer was obtained via further recrystallization in MeOH for characterization.

$R_f$  = 0.51 [0.5% triethylamine in petroleum ether].

<sup>1</sup>H NMR (400 MHz, CDCl<sub>3</sub>):  $\delta$  7.78 (d,  $J$  = 7.8 Hz, 2H), 7.70 (d,  $J$  = 7.5 Hz, 2H), 7.45 – 7.35 (m, 6H), 7.31 – 7.27 (m, 4H), 7.20 (d,  $J$  = 7.8 Hz, 3H), 7.00 (d,  $J$  = 7.0 Hz, 2H), 4.69 (d,  $J$  = 4.7 Hz, 1H), 3.25 (dd,  $J$  = 16.9, 4.0 Hz, 1H), 3.16 (dd,  $J$  = 16.8, 7.4 Hz, 1H), 2.81 – 2.72 (m, 1H), 2.41 (s, 3H), 1.66 – 1.56 (m, 3H), 1.54 – 1.45 (m, 2H), 1.26 – 1.18 (m, 1H), 1.11 – 1.01 (m, 3H), 1.00 – 0.89 (m, 2H); <sup>13</sup>C NMR (101 MHz, CDCl<sub>3</sub>):  $\delta$  200.6, 167.4, 144.9, 143.2, 140.0, 136.9, 135.0, 130.0, 129.1, 128.8, 128.5, 128.4, 128.3, 128.2, 128.1, 127.8, 127.6, 126.6, 66.8, 48.0, 40.1, 37.4, 31.4, 30.3, 26.9, 26.8, 26.7, 21.7; IR (ATR): 2921, 2850, 1675, 1607, 1446, 1314, 1273, 1179, 1029, 809, 772, 695 cm<sup>-1</sup>; HRMS (ESI) calculated for C<sub>36</sub>H<sub>38</sub>NO<sup>+</sup> [M+H<sup>+</sup>]: 500.2948, found: 500.2948.

#### 1-(4-bromophenyl)-3-cyclohexyl-4-((diphenylmethylene)amino)-4-phenylbutan-1-one (3al)

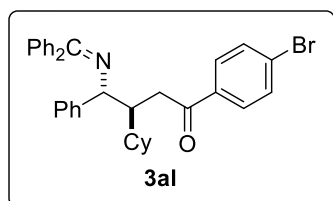

The preparation of **3al** was followed according to General Procedure C. <sup>1</sup>H NMR analysis of the crude revealed a 5:1 mixture of anti and syn isomer. **3al** was isolated as a white solid (108 mg, 96% combined) consisting of two diastereomers (5:1 isolated dr). A small amount of diastereoisomeric mixture (< 30

mg) was further purified by preparative TLC (0.5% triethylamine in petroleum ether) to obtain the major isomer for characterization.

$R_f$  = 0.36 [0.5% triethylamine in petroleum ether].

<sup>1</sup>H NMR (400 MHz, CDCl<sub>3</sub>):  $\delta$  7.69 – 7.62 (m, 4H), 7.48 (d,  $J$  = 8.6 Hz, 2H), 7.45 – 7.28 (m, 6H), 7.26 – 7.16 (m, 5H), 6.95 (d,  $J$  = 5.9 Hz, 2H), 4.64 (d,  $J$  = 4.9 Hz, 1H), 3.24 (dd,  $J$  = 16.6, 4.4 Hz, 1H), 3.04 (dd,  $J$  = 16.7, 7.1 Hz, 1H), 2.76 – 2.65 (m, 1H), 1.64 – 1.55 (m, 3H), 1.52 – 1.44 (m, 2H), 1.25 – 1.19 (m, 1H), 1.09 – 0.99 (m, 3H), 0.96 – 0.84 (m, 2H); <sup>13</sup>C NMR (101 MHz, CDCl<sub>3</sub>):  $\delta$  200.0, 167.6, 144.7, 139.8, 136.8, 136.2, 131.6, 130.1, 129.9, 128.7, 128.6, 128.34, 128.28, 128.1, 127.7, 127.6, 127.5, 126.7, 66.8, 48.4, 40.0, 37.5, 31.4, 30.2, 26.83, 26.76, 26.65; IR (ATR): 2922, 2850, 1683, 1583, 1446, 1275, 1070, 1001, 773, 695 cm<sup>-1</sup>; HRMS (ESI) calculated for C<sub>35</sub>H<sub>35</sub>BrNO<sup>+</sup> [M+H<sup>+</sup>]: 564.1897, found: 564.1897.

**1-([1,1'-biphenyl]-4-yl)-3-cyclohexyl-4-((diphenylmethylene)amino)-4-phenylbutan-1-one (3am)**

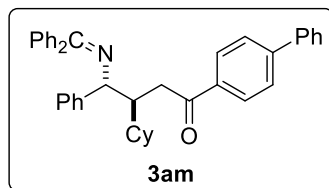

The preparation of **3am** was followed according to General Procedure C.  $^1\text{H}$  NMR analysis of the crude revealed a 7:1 mixture of anti and syn isomer. **3am** was isolated as a white solid (70 mg, 62% combined) consisting of two diastereomers (4:1 isolated dr).

$R_f = 0.36$  [0.5% triethylamine in petroleum ether].

These reported data are for the mixture of diastereomers.  $^1\text{H}$  NMR (400 MHz,  $\text{CDCl}_3$ ):  $\delta$  7.94 (d,  $J = 8.0$  Hz, 1.6H), 7.78 (d,  $J = 8.1$  Hz, 0.4H), 7.74 – 7.66 (m, 2H), 7.68 – 7.55 (m, 4H), 7.49 (t,  $J = 7.6$  Hz, 2H), 7.45 – 7.31 (m, 8H), 7.31 – 7.27 (m, 3H), 7.25 – 7.15 (m, 1H), 7.03 – 6.92 (m, 2H), 4.71 (d,  $J = 4.9$  Hz, 0.8H), 4.45 (d,  $J = 7.3$  Hz, 0.2H), 3.32 (dd,  $J = 16.7, 4.2$  Hz, 0.8H), 3.19 (dd,  $J = 16.8, 7.2$  Hz, 0.8H), 3.05 – 2.90 (m, 0.4H), 2.87 – 2.77 (m, 0.8H), 2.72 (dd,  $J = 15.9, 5.2$  Hz, 0.2H), 1.72 – 1.59 (m, 3H), 1.57 – 1.49 (m, 2H), 1.29 – 1.20 (m, 1H), 1.14 – 1.03 (m, 3H), 1.02 – 0.89 (m, 2H);  $^{13}\text{C}$  NMR (101 MHz,  $\text{CDCl}_3$ ):  $\delta$  200.5, 199.9, 167.4, 166.6, 145.12, 145.09, 144.8, 143.4, 140.2, 140.1, 139.9, 136.9, 136.2, 130.0, 129.9, 129.1, 129.0, 128.9, 128.8, 128.7, 128.6, 128.5, 128.32, 128.26, 128.21, 128.18, 128.1, 128.08, 128.05, 127.9, 127.7, 127.6, 127.34, 127.30, 127.0, 126.9, 126.6, 68.2, 66.8, 48.1, 47.1, 40.1, 38.7, 37.6, 36.9, 32.6, 31.4, 30.2, 29.8, 28.4, 27.1, 26.9, 26.8, 26.7; IR (ATR): 2921, 2849, 1675, 1602, 1489, 1447, 1273, 1181, 1003, 762, 695  $\text{cm}^{-1}$ ; HRMS (ESI) calculated for  $\text{C}_{41}\text{H}_{39}\text{NOK}^+$  [ $\text{M}+\text{K}^+$ ]: 600.2663, found: 600.2664.

**3-cyclohexyl-4-((diphenylmethylene)amino)-4-phenyl-1-(*m*-tolyl)butan-1-one (3an)**

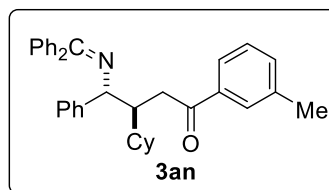

The preparation of **3an** was followed according to General Procedure C.  $^1\text{H}$  NMR analysis of the crude revealed a 9:1 mixture of anti and syn isomer. **3an** was isolated as a yellow solid (98.8 mg, 99% combined) consisting of two diastereomers (9:1 isolated dr). Analytical sample of the major isomer was

obtained via further recrystallization in MeOH for characterization.

$R_f = 0.41$  [0.5% triethylamine in petroleum ether].

$^1\text{H}$  NMR (400 MHz,  $\text{CDCl}_3$ ):  $\delta$  7.70 – 7.56 (m, 4H), 7.42 – 7.30 (m, 6H), 7.29 – 7.21 (m, 6H), 7.20 – 7.15 (m, 1H), 6.95 (d,  $J = 6.2$  Hz, 2H), 4.63 (d,  $J = 4.9$  Hz, 1H), 3.21 (dd,  $J = 16.8, 4.2$  Hz, 1H), 3.10 (dd,  $J = 16.8, 7.4$  Hz, 1H), 2.78 – 2.68 (m, 1H), 2.34 (s, 3H), 1.60 – 1.53 (m, 3H), 1.50 – 1.40 (m, 2H), 1.25 – 1.13 (m, 1H), 1.07 – 0.97 (m, 3H), 0.96 – 0.81 (m, 2H);  $^{13}\text{C}$  NMR (101 MHz,  $\text{CDCl}_3$ ):  $\delta$  201.3, 167.4, 144.9, 140.0, 138.1, 137.6, 136.9, 133.3, 130.0, 128.9,



128.8, 128.6, 128.3, 128.2, 128.1, 127.8, 127.6, 126.6, 125.5, 66.9, 48.0, 40.0, 37.7, 31.4, 30.2, 26.9, 26.8, 26.7, 21.5; **IR (ATR)**: 2922, 2851, 1682, 1489, 1446, 1314, 1283, 1028, 1001, 752, 694  $\text{cm}^{-1}$ ; **HRMS (ESI)** calculated for  $\text{C}_{36}\text{H}_{38}\text{NO}^+$   $[\text{M}+\text{H}^+]$ : 500.2948, found: 500.2948.

**1-(3-chlorophenyl)-3-cyclohexyl-4-((diphenylmethylene)amino)-4-phenylbutan-1-one (3ao)**

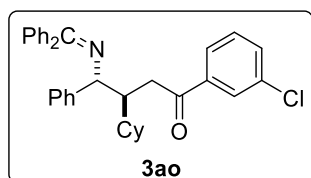

The preparation of **3ao** was followed according to General Procedure C.  $^1\text{H}$  NMR analysis of the crude revealed an 8:1 mixture of anti and syn isomer. **3ao** was isolated as yellow liquid (68 mg, 66%) and was diastereoisomeric pure.

$^1\text{H}$  NMR (400 MHz,  $\text{CDCl}_3$ ):  $\delta$  7.79 (s, 1H), 7.66 (d,  $J$  = 8.0 Hz, 1H), 7.60 (d,  $J$  = 7.6 Hz, 2H), 7.41 – 7.34 (m, 5H), 7.33 – 7.28 (m, 3H), 7.24 – 7.21 (m, 2H), 7.20 – 7.16 (m, 3H), 6.92 (d,  $J$  = 7.0 Hz, 2H), 4.59 (d,  $J$  = 5.2 Hz, 1H), 3.19 (dd,  $J$  = 16.7, 4.7 Hz, 1H), 3.01 (dd,  $J$  = 16.8, 6.8 Hz, 1H), 2.77 – 2.65 (m, 1H), 1.61 – 1.52 (m, 3H), 1.47 – 1.40 (m, 2H), 1.22 – 1.15 (m, 1H), 1.05 – 0.97 (m, 3H), 0.93 – 0.82 (m, 2H);  $^{13}\text{C}$  NMR (101 MHz,  $\text{CDCl}_3$ )  $\delta$  199.6, 167.6, 144.6, 139.7, 139.1, 136.8, 134.7, 132.4, 130.1, 129.7, 128.7, 128.6, 128.5, 128.4, 128.3, 128.1, 127.7, 127.6, 126.7, 126.4, 66.8, 48.3, 39.9, 37.7, 31.5, 30.1, 26.82, 26.75, 26.7; **IR (ATR)**: 2921, 2850, 1684, 1571, 1490, 1447, 1278, 1211, 754, 695  $\text{cm}^{-1}$ ; **HRMS (ESI)** calculated for  $\text{C}_{35}\text{H}_{35}\text{ClNO}^+$   $[\text{M}+\text{H}^+]$ : 520.2402, found: 520.2402.

**3-cyclohexyl-4-((diphenylmethylene)amino)-1-(2-methoxyphenyl)-4-phenylbutan-1-one (3ap)**

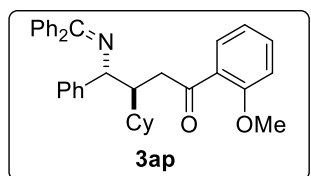

The preparation of **3ap** was followed according to General Procedure C.  $^1\text{H}$  NMR analysis of the crude revealed a 2:1 mixture of anti and syn isomer. **3ap** was isolated as a pale-yellow solid (86 mg, 84% combined) consisting of two diastereomers (2:1 isolated dr).

Analytical sample of the major isomer was obtained via further recrystallization in MeOH for characterization.

$^1\text{H}$  NMR (400 MHz,  $\text{CDCl}_3$ ):  $\delta$  7.66 (d,  $J$  = 7.4 Hz, 2H), 7.40 – 7.29 (m, 8H), 7.25 – 7.20 (m, 3H), 7.21 – 7.11 (m, 2H), 6.93 (d,  $J$  = 6.6 Hz, 2H), 6.90 – 6.79 (m, 2H), 4.58 (d,  $J$  = 5.3 Hz, 1H), 3.79 (s, 3H), 3.33 – 3.13 (m, 2H), 2.79 – 2.60 (m, 1H), 1.66 – 1.52 (m, 3H), 1.50 – 1.40 (m, 2H), 1.20 – 1.11 (m, 1H), 1.08 – 0.97 (m, 3H), 0.95 – 0.80 (m, 2H);  $^{13}\text{C}$  NMR (101 MHz,  $\text{CDCl}_3$ ):  $\delta$  203.5, 166.7, 157.8, 145.0, 140.1, 137.0, 132.5, 130.4, 129.9, 129.6, 128.8, 128.4, 128.2, 128.0, 127.8, 127.6, 126.4, 120.5, 111.3, 67.0, 55.5, 47.3, 42.7, 40.0, 31.4, 30.1, 26.9, 26.8, 26.7; **IR (ATR)**: 2921, 2849, 1674, 1596, 1485, 1446, 1435, 1285, 1241, 1026, 754, 695  $\text{cm}^{-1}$ ; **HRMS (ESI)** calculated for  $\text{C}_{36}\text{H}_{38}\text{NO}_2^+$   $[\text{M}+\text{H}^+]$ : 516.2897, found: 516.2897.

**3-cyclohexyl-1-(3,5-dimethylphenyl)-4-((diphenylmethylene)amino)-4-phenylbutan-1-one (3aq)**

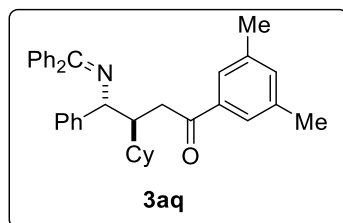

The preparation of **3aq** was followed according to General Procedure C.  $^1\text{H}$  NMR analysis of the crude revealed an 8:1 mixture of anti and syn isomer. **3aq** was isolated as white solid (90 mg, 88%) and was diastereoisomeric pure.

$^1\text{H}$  NMR (400 MHz,  $\text{CDCl}_3$ ):  $\delta$  7.82 (d,  $J$  = 6.6 Hz, 2H), 7.64 – 7.44 (m, 9H), 7.45 – 7.39 (m, 4H), 7.37 – 7.32 (m, 1H), 7.11 (d,  $J$  = 6.5 Hz, 2H), 4.80 (d,  $J$  = 5.0 Hz, 1H), 3.37 (dd,  $J$  = 16.6, 4.2 Hz, 1H), 3.25 (dd,  $J$  = 16.6, 7.4 Hz, 1H), 2.95 – 2.87 (m, 1H), 2.47 (s, 6H), 1.86 – 1.71 (m, 3H), 1.68 – 1.57 (m, 2H), 1.41 – 1.29 (m, 1H), 1.26 – 1.14 (m, 3H), 1.14 – 1.00 (m, 2H);  $^{13}\text{C}$  NMR (101 MHz,  $\text{CDCl}_3$ )  $\delta$  201.5, 167.3, 144.9, 140.0, 137.9, 137.6, 136.9, 134.1, 130.0, 128.8, 128.5, 128.3, 128.2, 128.0, 127.8, 127.6, 126.5, 126.1, 67.0, 48.1, 40.0, 37.7, 31.3, 30.2, 26.9, 26.8, 26.7, 21.4; **IR (ATR)**: 2921, 2850, 1683, 1601, 1490, 1446, 1314, 1293, 1180, 1157, 1029, 851, 773, 760  $\text{cm}^{-1}$ ; **HRMS (ESI)** calculated for  $\text{C}_{37}\text{H}_{39}\text{NONa}^+$   $[\text{M}+\text{Na}^+]$ : 536.2924, found: 536.2925.

**3-cyclohexyl-4-((diphenylmethylene)amino)-1-(naphthalen-1-yl)-4-phenylbutan-1-one (3ar)**

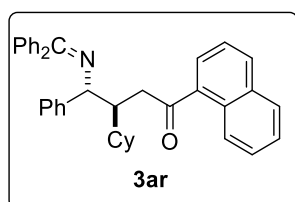

The preparation of **3ar** was followed according to General Procedure C.  $^1\text{H}$  NMR analysis of the crude revealed a 2:1 mixture of anti and syn isomer. **3ar** was isolated as white solid (75 mg, 70% combined) consisting of two diastereomers (2:1 isolated dr). A small amount of diastereoisomeric mixture was further purified by

preparative TLC (0.5% triethylamine in petroleum ether) to obtain the major isomer for characterization.

$^1\text{H}$  NMR (400 MHz,  $\text{CDCl}_3$ ):  $\delta$  8.29 (brs, 1H), 7.97 – 7.73 (m, 5H), 7.66 (d,  $J$  = 6.8 Hz, 2H), 7.59 – 7.50 (m, 2H), 7.41 – 7.30 (m, 7H), 7.25 – 7.18 (m, 3H), 6.97 (d,  $J$  = 6.4 Hz, 2H), 4.68 (d,  $J$  = 4.8 Hz, 1H), 3.40 (dd,  $J$  = 16.5, 4.2 Hz, 1H), 3.23 (dd,  $J$  = 16.5, 7.5 Hz, 1H), 2.78 (s, 1H), 1.64 – 1.49 (m, 5H), 1.26 – 1.20 (m, 1H), 1.08 – 1.01 (m, 3H), 0.99 – 0.88 (m, 2H);  $^{13}\text{C}$  NMR (101 MHz,  $\text{CDCl}_3$ ):  $\delta$  201.2, 167.5, 144.9, 140.0, 137.0, 135.4, 134.9, 132.6, 130.1, 129.7, 129.7, 128.8, 128.6, 128.2, 128.1, 127.8, 127.7, 126.7, 126.6, 124.5, 67.0, 48.5, 40.2, 37.7, 31.4, 30.3, 26.9, 26.9, 26.7; **IR (ATR)**: 3064, 3028, 2931, 1678, 1622, 1598, 1578, 1491, 1447, 1314, 1287, 1073, 1028, 1001, 774, 749, 692  $\text{cm}^{-1}$ ; **HRMS (ESI)** calculated for  $\text{C}_{39}\text{H}_{38}\text{NO}^+$   $[\text{M}+\text{H}^+]$ : 536.2948, found: 536.2948.

**3-cyclohexyl-4-((diphenylmethylene)amino)-4-phenyl-1-(thiophen-2-yl)butan-1-one (3as)**

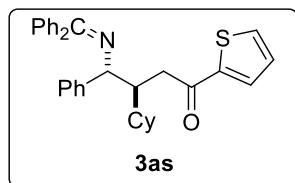

The preparation of **3as** was followed according to General Procedure C. <sup>1</sup>H NMR analysis of the crude revealed a 5:1 mixture of anti and syn isomer. **3as** was isolated as a pale-yellow oil (85 mg, 87% combined) consisting of two diastereomers (8:1 isolated dr).

A small amount of diastereoisomeric mixture (< 30 mg) was further purified by preparative TLC (0.5% triethylamine in petroleum ether) to obtain the major isomer for characterization.

<sup>1</sup>H NMR (400 MHz, CDCl<sub>3</sub>): δ 7.66 (d, *J* = 7.0 Hz, 2H), 7.61 (d, *J* = 3.7 Hz, 1H), 7.52 (d, *J* = 5.0 Hz, 1H), 7.48 – 7.36 (m, 5H), 7.38 – 7.29 (m, 3H), 7.31 – 7.26 (m, 2H), 7.23 – 7.17 (m, 1H), 7.05 – 7.01 (m, 1H), 6.99 (d, *J* = 6.3 Hz, 2H), 4.66 (d, *J* = 5.0 Hz, 1H), 3.19 (dd, *J* = 16.5, 4.6 Hz, 1H), 3.09 (dd, *J* = 16.6, 7.1 Hz, 1H), 2.85 – 2.73 (m, 1H), 1.69 – 1.56 (m, 3H), 1.56 – 1.48 (m, 2H), 1.30 – 1.22 (m, 1H), 1.11 – 1.01 (m, 3H), 1.01 – 0.90 (m, 2H); <sup>13</sup>C NMR (101 MHz, CDCl<sub>3</sub>): δ 193.5, 167.4, 145.0, 144.8, 139.8, 136.9, 132.9, 131.5, 130.0, 128.7, 128.5, 128.3, 128.2, 128.0, 127.9, 127.7, 127.6, 126.6, 66.7, 48.3, 39.9, 38.3, 31.4, 30.1, 26.9, 26.8, 26.7; IR (ATR): 2922, 2850, 1654, 1622, 1446, 1415, 1275, 1238, 1028, 773, 724, 695 cm<sup>-1</sup>; HRMS (ESI) calculated for C<sub>33</sub>H<sub>34</sub>NOS<sup>+</sup> [M+H<sup>+</sup>]: 492.2334, found: 492.2333.

### 3.7 Synthetic Application

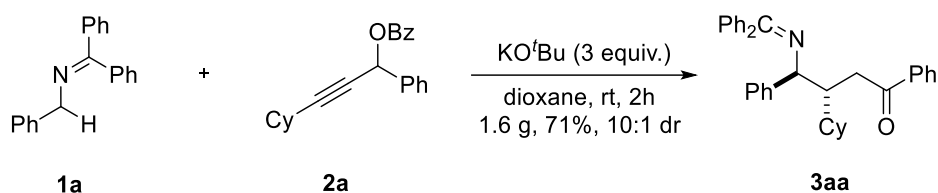

In a nitrogen-filled glove box, to an oven dried flask with a magnetic stir bar was charged with imines **1a** (1.2 g, 4.6 mmol, 1.0 equiv.), K<sup>t</sup>OBu (1.5 g, 13.8 mmol, 3.0 equiv.) and 1,4 - dioxane (50 mL). The reaction mixture was stirred at room temperature for 5 min and alkynes **2a** (2.9 g, 9.2 mmol, 2.0 equiv.) were subsequently added. The flask was sealed with a rubber septum, removed from glovebox and stirred at rt for 2h. The reaction mixture was diluted with 120 mL of petroleum ether to allow the salts to precipitate. The resulting mixture was filtered through a pad of celite, rinsed with petroleum ether (220 mL × 2) and the filtrate was concentrated *in vacuo*. The crude was purified through SiO<sub>2</sub> flash column chromatography with elution (triethylamine:petroleum ether = 5: 100) to obtain products **3aa** (1.6 g, 71%) as a single diastereoisomer. The diastereoselectivity (anti/syn ratio) of the reaction was confirmed by analyzing the <sup>1</sup>H NMR of crude product.

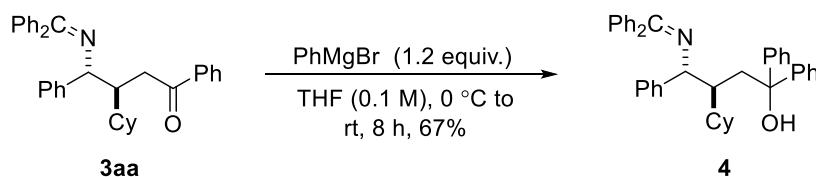

To a stirring solution of **3aa** (97 mg, 0.2 mmol, 1.0 equiv.) in THF (2.0 mL) at 0 °C under nitrogen atmosphere was added PhMgBr solution (1 M in THF, 0.24 mL, 0.24 mmol, 1.2 equiv.) dropwise. The resulting solution was warmed to room temperature and stirred at for 8 h. The reaction was quenched by adding aq. NH<sub>4</sub>Cl (10 mL) at 0 °C. 10 mL ethyl acetate was added, the organic layer was separated, and the aqueous layer was extracted with ethyl acetate (10 mL  $\times$  2). The organic phases were combined, dried over anhydrous sodium sulfate, filtered through a coarse fritted glass funnel, and the filtrate was concentrated *in vacuo*. The crude product was purified by silica gel column chromatography using petroleum ether/dichloromethane (2:1) as the eluent, yielding title product **4** as a film (76.0 mg, 67%).

**<sup>1</sup>H NMR** (400 MHz, CDCl<sub>3</sub>):  $\delta$  7.82 (d,  $J$  = 7.1 Hz, 1H), 7.62 (d,  $J$  = 7.4 Hz, 2H), 7.58 (d,  $J$  = 7.4 Hz, 2H), 7.52 (d,  $J$  = 7.3 Hz, 2H), 7.48 (d,  $J$  = 7.7 Hz, 1H), 7.44–7.37 (m, 3H), 7.33 (t,  $J$  = 7.3 Hz, 1H), 7.30–7.11 (m, 9H), 7.08 (d,  $J$  = 6.3 Hz, 2H), 6.85 (d,  $J$  = 6.1 Hz, 2H), 4.34 (d,  $J$  = 9.7 Hz, 1H), 2.54 (d,  $J$  = 14.3 Hz, 1H), 2.38 (t,  $J$  = 8.5 Hz, 1H), 2.26 (dd,  $J$  = 14.3, 7.1 Hz, 1H), 1.60–1.55 (m, 1H), 1.33–1.28 (m, 2H), 0.99–0.83 (m, 5H), 0.83–0.74 (m, 1H), 0.47 (q,  $J$  = 11.6 Hz, 1H), 0.26 (d,  $J$  = 13.2 Hz, 1H); **<sup>13</sup>C NMR** (101 MHz, CDCl<sub>3</sub>):  $\delta$  171.1, 151.2, 147.8, 145.0, 138.7, 136.8, 132.6, 130.8, 130.2, 129.0, 128.7, 128.5, 128.4, 128.29, 128.26, 127.9, 127.6, 127.5, 127.2, 126.9, 126.5, 126.2, 126.0, 76.4, 67.7, 45.4, 40.6, 39.2, 30.7, 27.1, 27.0, 26.8, 26.6; **IR (ATR)**: 3056, 2919, 2850, 1618, 1597, 1491, 1445, 1316, 1161, 1061, 1029, 998, 919, 771, 752, 696, 557 cm<sup>-1</sup>; **HRMS (ESI)** calculated for C<sub>22</sub>H<sub>26</sub>N<sup>+</sup> [ $M+H^+$ ]: 564.3261, found: 564.3261.

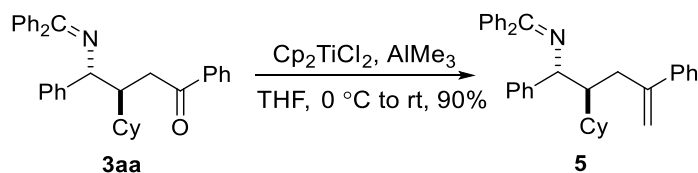

**Synthesis of Tebbe reagent:** to a stirring suspension of titanocene dichloride (602.2 mg, 2.4 mmol, 1.0 equiv.) in toluene (2.4 mL) at room temperature was added dropwise a solution of AlMe<sub>3</sub> (2 M in hexanes, 2.45 mL, 2.0 equiv.). The resulting dark red solution was stirred at room temperature for 2 days, then used directly.

To a stirring solution of **3aa** (97 mg, 0.2 mmol, 1.0 equiv.) in THF (2 mL) at 0 °C was added dropwise the above prepared Tebbe reagent (0.5 M, 1.2 mL, 0.6 mmol, 3.0 equiv.). The resulting solution was stirred at 0 °C for 5 mins, then warmed to room temperature, and stirred for 30 mins. The reaction mixture was diluted with 3 mL Et<sub>2</sub>O, and then quenched by dropwise addition of aq. NaOH (0.1 M, 0.2 mL) until gas ceased. The mixture was dried over anhydrous magnesium sulfate, filtered through a coarse fritted glass funnel, and the filtrate was concentrated *in vacuo*. The crude product was purified by silica gel column chromatography using petroleum ether/ethyl acetate (20:1) containing 5% triethylamine as the eluent, yielding desired product **5** (87 mg, 90%) as a colorless film.

**<sup>1</sup>H NMR** (400 MHz, CDCl<sub>3</sub>): δ 7.74 (d, *J* = 6.1 Hz, 2H), 7.41 – 7.34 (m, 6H), 7.24 – 7.13 (m, 8H), 7.10 – 7.05 (m, 2H), 6.95 (d, *J* = 5.7 Hz, 2H), 5.21 (s, 1H), 5.07 (s, 1H), 4.51 (d, *J* = 4.4 Hz, 1H), 3.01 (d, *J* = 14.9 Hz, 1H), 2.74 (dd, *J* = 15.0, 9.9 Hz, 1H), 1.92 – 1.83 (m, 1H), 1.56 – 1.44 (m, 2H), 1.34 – 1.24 (m, 3H), 1.04 – 0.96 (m, 4H), 0.87 – 0.83 (m, 2H); **<sup>13</sup>C NMR** (101 MHz, CDCl<sub>3</sub>): δ 166.3, 149.2, 145.8, 141.1, 140.3, 137.2, 129.9, 128.8, 128.4, 128.20, 128.15, 128.11, 128.08, 127.9, 127.8, 127.0, 126.6, 126.3, 113.7, 67.3, 49.5, 39.9, 33.1, 30.7, 30.3, 27.4, 27.2, 27.0; **HRMS (ESI)** calculated for C<sub>36</sub>H<sub>38</sub>N<sup>+</sup> [*M*+H<sup>+</sup>]: 484.2999, found: 484.2997.

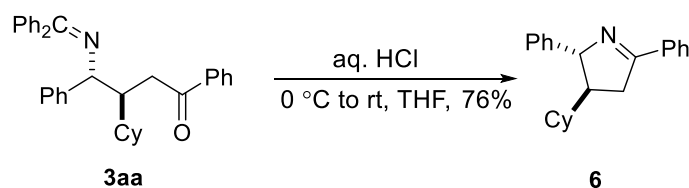

To a stirring solution of **3aa** (97 mg, 0.2 mmol, 1.0 equiv.) in THF (2.0 mL) at 0 °C was added aq. HCl (1 M, 1 mL, 1 mmol, 10 equiv.) dropwise, and the resulting solution mixture was warmed to room temperature and stirred for 5 mins. The reaction was quenched by adding 1N aqueous NaOH solution until a pH of 10 reached. After stirring for 5 mins, dichloromethane (5 mL) was added, the organic layer was separated, and the aqueous layer was extracted with dichloromethane (10 mL × 3). The organic phases were combined and dried over anhydrous sodium sulfate, filtered through a coarse fritted glass funnel, and the filtrate was concentrated *in vacuo*. The crude residue was purified by silica gel column chromatography using petroleum ether/ethyl acetate (20:1) as the eluent, yielding desired **6** (46 mg, 76%) as a colorless film.

**<sup>1</sup>H NMR** (400 MHz, CDCl<sub>3</sub>): δ 7.86 (d, *J* = 7.9 Hz, 2H), 7.44 – 7.31 (m, 3H), 7.29 – 7.23 (m, 2H), 7.19 – 7.14 (m, 3H), 5.01 (d, *J* = 5.9 Hz, 1H), 3.32 – 3.00 (m, 1H), 2.77 (dd, *J* = 17.2, 6.5 Hz, 1H), 2.31 – 2.04 (m, 1H), 1.74 – 1.52 (m, 4H), 1.46 – 1.30 (m, 1H), 1.26 – 1.10 (m, 4H),

1.09 – 0.95 (m, 1H), 0.95 – 0.78 (m, 1H);  $^{13}\text{C}$  NMR (101 MHz,  $\text{CDCl}_3$ ):  $\delta$  172.9, 144.7, 134.6, 130.7, 128.57, 128.55, 128.0, 127.2, 126.9, 79.5, 52.4, 41.6, 38.9, 31.7, 30.4, 26.7, 26.53, 26.48; **HRMS (ESI)** calculated for  $\text{C}_{22}\text{H}_{26}\text{N}^+$   $[\text{M}+\text{H}^+]$ : 304.2060, found: 304.2055.

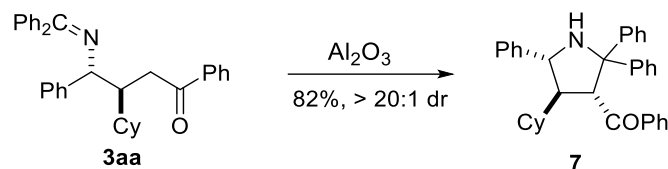

$\gamma$ -aminoketone **3aa** (97 mg, 0.2 mmol) was subjected to a neutral alumina (25 g) packed column chromatography with petroleum ether/ethyl acetate (20:1) as the eluent (elution flow rate < 5 mL/min). The collected solution was concentrated *in vacuo*, affording the title product **7** (80 mg, 82%, >20:1 dr isolated) as a colorless film.

$^1\text{H}$  NMR (400 MHz,  $\text{CDCl}_3$ ):  $\delta$  7.82 (d,  $J$  = 8.5 Hz, 4H), 7.69 (d,  $J$  = 7.6 Hz, 2H), 7.51 (t,  $J$  = 7.4 Hz, 1H), 7.44 – 7.37 (m, 6H), 7.33 – 7.27 (m, 2H), 7.24 – 7.18 (m, 2H), 6.99 – 6.84 (m, 3H), 5.29 (d,  $J$  = 3.4 Hz, 1H), 3.89 (d,  $J$  = 7.9 Hz, 1H), 3.45 (brs, 1H), 2.77 – 2.66 (m, 1H), 1.89 (d,  $J$  = 12.8 Hz, 1H), 1.64 (d,  $J$  = 12.8 Hz, 1H), 1.50 – 1.40 (m, 3H), 1.24 – 1.13 (m, 2H), 0.99 – 0.88 (m, 3H), 0.53 – 0.37 (m, 1H);  $^{13}\text{C}$  NMR (101 MHz,  $\text{CDCl}_3$ ):  $\delta$  204.7, 146.7, 144.3, 143.7, 138.9, 132.7, 128.74, 128.69, 128.6, 128.2, 127.7, 127.5, 127.0, 126.9, 126.6, 126.3, 76.4, 66.9, 60.3, 56.8, 41.8, 33.0, 32.4, 26.4, 26.3, 26.0; **HRMS (ESI)** calculated for  $\text{C}_{35}\text{H}_{36}\text{NO}^+$   $[\text{M}+\text{H}^+]$ : 486.2791, found: 486.2789.

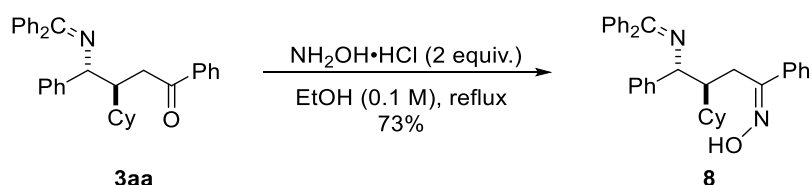

To a stirring solution of **3aa** (97 mg, 0.2 mmol, 1.0 equiv.) in EtOH (2.0 mL) at rt was added,  $\text{NH}_2\text{OH}\cdot\text{HCl}$  (28 mg, 0.4 mmol, 2.0 equiv.) and  $\text{Et}_3\text{N}$  (50.6 mg, 0.5 mmol, 2.5 equiv.). The mixture was heated under reflux for 8 h until the reaction was judged to be complete by TLC analysis. The reaction mixture was cooled to room temperature, ethyl acetate (10.0 mL) and water (10.0 mL) were added. The organic layer was separated, and the aqueous layer was extracted with ethyl acetate (10 mL  $\times$  2). The organic phases were combined and dried over anhydrous sodium sulfate, filtered through a coarse fritted glass funnel, and the filtrate was concentrated *in vacuo*. The crude product was purified by silica gel column chromatography using petroleum ether/dichloromethane (1:4) as the eluent, yielding product **8** (73.0 mg, 73%).

**<sup>1</sup>H NMR** (400 MHz, CDCl<sub>3</sub>): δ 8.76 (s, 1H), 7.95 (d, *J* = 6.0 Hz, 2H), 7.46 – 7.44 (m, 7H), 7.43 – 7.39 (m, 5H), 7.37 – 7.30 (m, 5H), 7.26 – 7.23 (m, 1H), 5.11 (d, *J* = 5.8 Hz, 1H), 3.27 – 3.15 (m, 1H), 2.86 (dd, *J* = 17.1, 6.1 Hz, 1H), 2.32 – 2.21 (m, 1H), 1.80 – 1.65 (m, 5H), 1.60 – 1.34 (m, 1H), 1.32 – 1.15 (m, 3H), 1.12 – 1.03 (m, 1H), 1.02 – 0.93 (m, 1H); **<sup>13</sup>C NMR** (101 MHz, CDCl<sub>3</sub>): δ 173.4, 157.6, 144.5, 136.4, 134.2, 132.9, 130.8, 129.5, 129.4, 129.1, 128.6, 128.5, 128.4, 128.3, 128.1, 127.9, 127.2, 126.9, 79.2, 52.2, 41.5, 38.9, 31.6, 30.3, 26.6, 26.5, 26.4; **IR (ATR)**: 3246, 2920, 2848, 1617, 1492, 1444, 1328, 1160, 1076, 994, 932, 917, 762, 692, 657 cm<sup>-1</sup>; **HRMS (ESI)** calculated for C<sub>35</sub>H<sub>37</sub>N<sub>2</sub>O<sup>+</sup> [*M*+H<sup>+</sup>]: 501.2900, found: 501.2900.

### 3.8 Mechanism Experiment

#### I. Radical Trapping Experiment

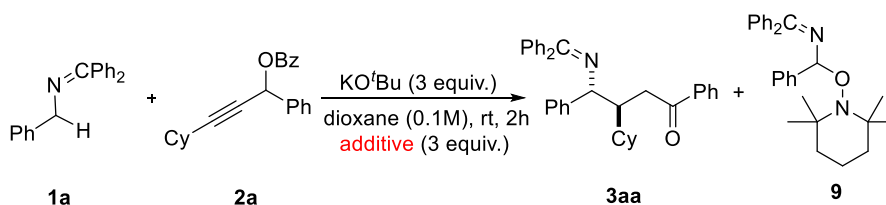

| entries | additive | yield of <b>3aa</b>    |
|---------|----------|------------------------|
| 1       | none     | 83%                    |
| 2       | TEMPO    | 0% (25% for <b>9</b> ) |
| 3       | BHT      | 0%                     |

In a nitrogen-filled glove box, to an oven dried 1-dram vial with a magnetic stir bar was charged with imines **1a** (54 mg, 0.2 mmol, 1.0 equiv.), K<sup>t</sup>OBu (0.6 mmol, 3.0 equiv.), additive (0.6 mmol, 3.0 equiv.) and 1,4 -dioxane (2 mL). The reaction mixture was stirred at room temperature for 5 min and propargyl ester **2a** (0.4 mmol, 2.0 equiv.) were subsequently added. The vial was capped, removed from glovebox and stirred at rt for 2h. The reaction mixture was added via glass pipet into a 10 mL vial containing 5 mL of petroleum ether to allow the salts to precipitate. The resulting mixture was filtered through a coarse fritted glass funnel, rinsed with petroleum ether (5 mL X 2) and the filtrate was concentrated *in vacuo*.

The reactions were checked by <sup>1</sup>H NMR and HRMS analysis and no desired product was formed. When TEMPO was employed, the crude was purified though SiO<sub>2</sub> flash column chromatography (0.5% triethylamine in petroleum ether), yielding byproduct **9** (21 mg, 25%) as a colorless film.

Spectral data for **9**: **<sup>1</sup>H NMR** (400 MHz, CDCl<sub>3</sub>) δ 7.72 (d, *J* = 6.9 Hz, 2H), 7.47 – 7.43 (m, 3H), 7.38 – 7.27 (m, 8H), 7.23 – 7.17 (m, 2H), 5.84 (s, 1H), 1.64 – 1.29 (m, 6H), 1.27 (s, 3H),

1.21 (s, 3H), 1.07 (s, 3H), 0.72 (s, 3H);  $^{13}\text{C}$  NMR (101 MHz,  $\text{CDCl}_3$ )  $\delta$  165.4, 141.1, 139.4, 136.8, 130.0, 128.7, 128.2, 128.0, 127.9, 127.8, 127.5, 127.1, 97.1, 60.2, 59.3, 40.5, 40.0, 34.9, 33.1, 20.6, 20.4, 17.2. This characterization data matches with the previously reported data.<sup>[7]</sup>

## II. Radical Clock Experiment

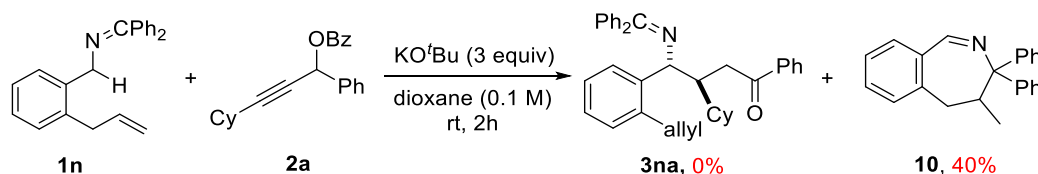

In a nitrogen-filled glove box, to an oven dried 1-dram vial with a magnetic stir bar was charged with imines **1n** (62 mg, 0.2 mmol, 1.0 equiv.),  $\text{K}^t\text{OBu}$  (67 mg, 0.6 mmol, 3.0 equiv.), additive (0.6 mmol, 3.0 equiv.) and 1,4 -dioxane (2 mL). The reaction mixture was stirred at room temperature for 5 min and propargyl ester **2a** (128 mg, 0.4 mmol, 2.0 equiv.) was subsequently added. The vial was capped, removed from glovebox and stirred at rt for 2h. The reaction mixture was added via glass pipet into a 10 mL vial containing 5 mL of petroleum ether to allow the salts to precipitate. The resulting mixture was filtered through a coarse fritted glass funnel, rinsed with petroleum ether (5 mL X 2) and the filtrate was concentrated *in vacuo*. The crude was purified though  $\text{SiO}_2$  flash column chromatography (0.5% triethylamine in petroleum ether), yielding cyclization byproduct **10** (25 mg, 40%) as a colorless film. No desired product **3na** was isolated.

Spectral data for **10**:  $^1\text{H}$  NMR (400 MHz,  $\text{CDCl}_3$ )  $\delta$  8.93 (s, 1H), 7.71 (dd,  $J = 8.4, 1.4$  Hz, 2H), 7.55 (dd,  $J = 7.1, 2.1$  Hz, 1H), 7.37 – 7.27 (m, 6H), 7.20 (q,  $J = 7.3$  Hz, 3H), 7.16 – 7.05 (m, 2H), 3.61 – 3.42 (m, 1H), 3.07 (dd,  $J = 16.9, 2.9$  Hz, 1H), 2.86 (dd,  $J = 17.1, 5.9$  Hz, 1H), 0.88 (d,  $J = 7.1$  Hz, 3H);  $^{13}\text{C}$  NMR (101 MHz,  $\text{CDCl}_3$ )  $\delta$  160.4, 147.8, 147.5, 140.1, 134.9, 133.7, 130.6, 130.5, 128.4, 128.0, 127.9, 126.6, 126.3, 126.1, 126.0, 74.7, 38.6, 36.5, 15.2; HRMS (ESI) calculated for  $\text{C}_{23}\text{H}_{22}\text{N}^+$  [ $\text{M}+\text{H}^+$ ]: 312.1747, found: 312.1741.

## III. Control Experiment

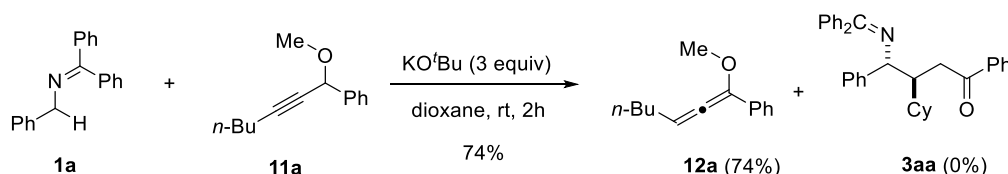

In a nitrogen-filled glove box, to an oven dried 1-dram vial with a magnetic stir bar was charged with imines **1a** (54 mg, 0.2 mmol, 1.0 equiv.),  $\text{K}^t\text{OBu}$  (67 mg, 0.6 mmol, 3.0 equiv.),



and 1,4 -dioxane (2 mL). The reaction mixture was stirred at room temperature for 5 min and propargyl ether **11a** (81 mg, 0.4 mmol, 2.0 equiv.) was subsequently added. The vial was capped, removed from glovebox and stirred at rt for 2h. The reaction mixture was added via glass pipet into a 10 mL vial containing 5 mL of petroleum ether to allow the salts to precipitate. The resulting mixture was filtered through a coarse fritted glass funnel, rinsed with petroleum ether (5 mL X 2) and the filtrate was concentrated *in vacuo*. The crude was purified through SiO<sub>2</sub> flash column chromatography (0.5% triethylamine in petroleum ether), yielding allene **12a** (28 mg, 74%) as a colorless film. No desired product **3aa** was isolated.

Note: compound **12a** was contaminated with minor unidentified impurity. Further purification led to decomposition.

**<sup>1</sup>H NMR** (400 MHz, CDCl<sub>3</sub>)  $\delta$  7.50 (d,  $J$  = 7.4 Hz, 2H), 7.45 – 7.42 (m, 1H), 7.32 (d,  $J$  = 7.9 Hz, 2H), 6.24 (t,  $J$  = 6.4 Hz, 1H), 3.60 (s, 3H), 2.28 – 2.17 (m, 2H), 1.56 – 1.47 (m, 2H), 1.42 (dt,  $J$  = 14.8, 7.0 Hz, 2H), 0.93 (t,  $J$  = 7.2 Hz, 3H); **<sup>13</sup>C NMR** (101 MHz, CDCl<sub>3</sub>)  $\delta$  192.4, 134.5, 134.1, 128.2, 127.4, 125.0, 109.8, 56.2, 31.5, 31.0, 22.5, 14.0; **HRMS (ESI)** calculated for C<sub>13</sub>H<sub>19</sub>N<sup>+</sup> [M+H<sup>+</sup>]: 191.1430, found: 191.1428.

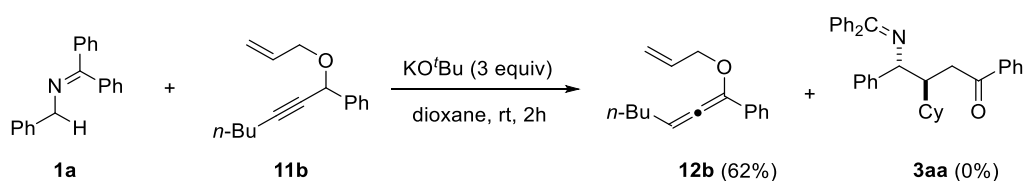

In a nitrogen-filled glove box, to an oven dried 1-dram vial with a magnetic stir bar was charged with imines **1a** (54 mg, 0.2 mmol, 1.0 equiv.), K<sup>t</sup>OBu (67 mg, 0.6 mmol, 3.0 equiv.), and 1,4 -dioxane (2 mL). The reaction mixture was stirred at room temperature for 5 min and propargyl ether **11b** (91 mg, 0.4 mmol, 2.0 equiv.) were subsequently added. The vial was capped, removed from glovebox and stirred at rt for 2h. The reaction mixture was added via glass pipet into a 10 mL vial containing 5 mL of petroleum ether to allow the salts to precipitate. The resulting mixture was filtered through a coarse fritted glass funnel, rinsed with petroleum ether (5 mL X 2) and the filtrate was concentrated *in vacuo*. The crude was purified through SiO<sub>2</sub> flash column chromatography (0.5% triethylamine in petroleum ether), yielding allene **12b** (26.8 mg, 62%) as a colorless film. No desired product **3aa** was isolated.

Note: compound **12b** was contaminated with minor unidentified impurity. Further purification led to decomposition.

**<sup>1</sup>H NMR** (400 MHz, CDCl<sub>3</sub>)  $\delta$  7.59 (d,  $J$  = 7.3 Hz, 2H), 7.40 – 7.35 (m, 3H), 6.25 (t,  $J$  = 6.5 Hz, 1H), 6.11 (m, 1H), 5.44 (dd,  $J$  = 17.3, 1.8 Hz, 1H), 5.29 (dd,  $J$  = 10.5, 1.7 Hz, 1H), 4.33 (m,

2H), 2.27 (q,  $J = 7.0$  Hz, 2H), 1.61 – 1.52 (m, 2H), 1.45 (q,  $J = 7.3$  Hz, 2H), 0.97 (t,  $J = 7.3$  Hz, 3H);  $^{13}\text{C}$  NMR (101 MHz,  $\text{CDCl}_3$ )  $\delta$  192.7, 134.5, 134.1, 128.2, 127.4, 125.1, 116.9, 109.5, 69.4, 31.4, 31.0, 22.5, 14.0; **HRMS (ESI)** calculated for  $\text{C}_{15}\text{H}_{21}\text{O}^+$  [ $\text{M}+\text{H}^+$ ]: 217.1587, found: 217.1585.

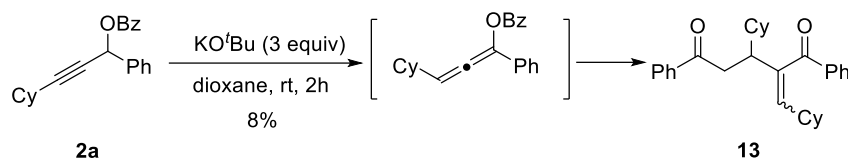

In a nitrogen-filled glove box, to an oven dried 1-dram vial with a magnetic stir bar was charged with  $\text{K}^t\text{OBu}$  (67 mg, 0.6 mmol, 3.0 equiv.), and 1,4 -dioxane (2 mL). Alkynes **2a** (91 mg, 0.4 mmol, 2.0 equiv.) were added. The vial was capped, removed from glovebox and stirred at rt for 2h. The reaction mixture was added via glass pipet into a 10 mL vial containing 5 mL of petroleum ether to allow the salts to precipitate. The resulting mixture was filtered through a coarse fritted glass funnel, rinsed with petroleum ether (5 mL X 2) and the filtrate was concentrated *in vacuo*. The crude was purified through  $\text{SiO}_2$  flash column chromatography (petroleum ether), yielding **13** (13.0 mg, 8%) as a colorless residue.

$^1\text{H}$  NMR (400 MHz,  $\text{CDCl}_3$ )  $\delta$  7.90 (dd,  $J = 13.1, 7.7$  Hz, 3H), 7.64 – 7.32 (m, 7H), 5.47 (d,  $J = 10.4$  Hz, 1H), 3.26 (dd,  $J = 17.0, 9.2$  Hz, 1H), 3.11 – 3.04 (m, 1H), 3.04 – 2.96 (m, 1H), 1.82 – 1.67 (m, 5H), 1.57 – 1.39 (m, 6H), 1.24 – 0.80 (m, 11H);  $^{13}\text{C}$  NMR (101 MHz,  $\text{CDCl}_3$ )  $\delta$  200.5, 200.0, 139.7, 138.3, 138.0, 137.6, 133.1, 133.0, 129.5, 128.7, 128.5, 128.1, 45.7, 40.6, 38.85, 38.80, 32.9, 31.8, 29.8, 28.2, 26.74, 26.71, 26.65, 25.8, 25.43, 25.40; **HRMS (ESI)** calculated for  $\text{C}_{30}\text{H}_{37}\text{O}_2^+$  [ $\text{M}+\text{H}^+$ ]: 429.2788, found: 429.2786.

## V. Competitive experiment

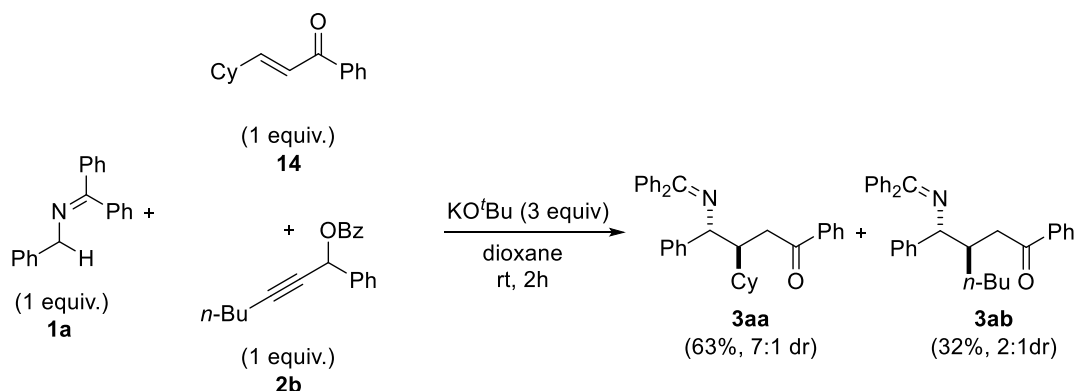

In a nitrogen-filled glove box, to an oven dried 1-dram vial with a magnetic stir bar was charged with imines **1a** (27 mg, 0.1 mmol, 1.0 equiv.),  $\text{K}^t\text{OBu}$  (34 mg, 0.3 mmol, 3.0 equiv.),

and 1,4 -dioxane (1 mL). The reaction mixture was stirred at room temperature for 5 minutes, propargyl ester **2b** (29 mg, 0.1 mmol, 1.0 equiv.) and  $\alpha,\beta$ -unsaturated ketone **14** (21 mg, 0.1 mmol, 1.0 equiv.) were added. The vial was capped, removed from glovebox and stirred at rt for 2h. The reaction mixture was added via glass pipet into a 10 mL vial containing 5 mL of petroleum ether to allow the salts to precipitate. The resulting mixture was filtered through a coarse fritted glass funnel, rinsed with petroleum ether (5 mL X 2) and the filtrate was concentrated *in vacuo*.  $^1\text{H}$  NMR analysis of the crude revealed a 7:1 mixture of anti and syn isomer for **3aa** and 2:1 mixture of anti and syn isomer for **3ab**. The crude was purified through  $\text{SiO}_2$  flash column chromatography (0.5% triethylamine in petroleum ether), respectively yielding **3aa** (30.5 mg, 63% combined, 10:1 isolated dr) as a colorless film along with **3ab** (14.7 mg, 32% combined, 2:1 isolated dr) as a colorless film.

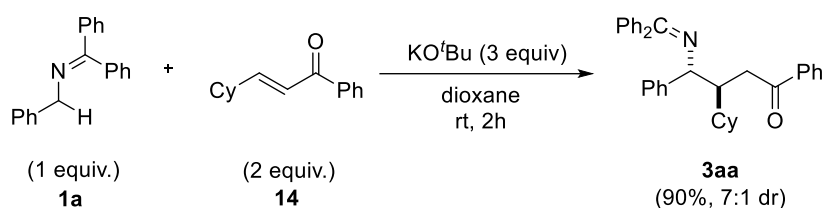

In a nitrogen-filled glove box, to an oven dried 1-dram vial with a magnetic stir bar was charged with imines **1a** (27 mg, 0.1 mmol, 1.0 equiv.),  $\text{K}^t\text{OBu}$  (34 mg, 0.3 mmol, 3.0 equiv.), and 1,4 -dioxane (1 mL). The reaction mixture was stirred at room temperature for 5 minutes, and  $\alpha,\beta$ -unsaturated ketone **17** (42 mg, 0.2 mmol, 2.0 equiv.) was added. The vial was capped, removed from glovebox and stirred at rt for 2h. The reaction mixture was added via glass pipet into a 10 mL vial containing 5 mL of petroleum ether to allow the salts to precipitate. The resulting mixture was filtered through a coarse fritted glass funnel, rinsed with petroleum ether (5 mL X 2) and the filtrate was concentrated *in vacuo*.  $^1\text{H}$  NMR analysis of the crude revealed a 7:1 mixture of anti and syn isomer for **3aa**. The crude was purified through  $\text{SiO}_2$  flash column chromatography (0.5% triethylamine in petroleum ether), yielding **3aa** (30.5 mg, 90% combined, 7:1 isolated dr) as a colorless film.

## V. Labelling experiment.

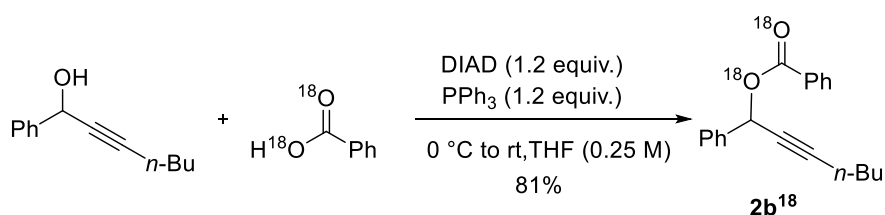

To a stirring solution of 1-phenylhept-2-yn-1-ol (338 mg, 1.8 mmol, 1.0 equiv.),  $^{18}\text{O}$  enriched benzoic acid<sup>[8]</sup> (230 mg, 1.8 mmol, 1.0 equiv.), and triphenylphosphine (566 mg, 2.2 mmol, 1.2 equiv.) in THF (0.25 M, 7.2 mL) at 0 °C was added DIAD (0.4 mL, 2.2 mmol, 1.2 equiv.) dropwise. The resulting solution was warmed to room temperature, and stirred for 24 h. The reaction was quenched by adding 10 mL of aq.  $\text{NaHCO}_3$  solution and extracted three times with ethyl acetate (15 mL X 3). The combined organic phases were washed with brine, dried over anhydrous sodium sulfate, and filtered through a coarse fritted glass funnel. The filtrate was concentrated *in vacuo*. Purification by silica gel column chromatography using 10% ethyl acetate in petroleum ether as the eluent afforded the title compound **2b**<sup>18</sup> (430 mg, 81%) as a colorless oil.

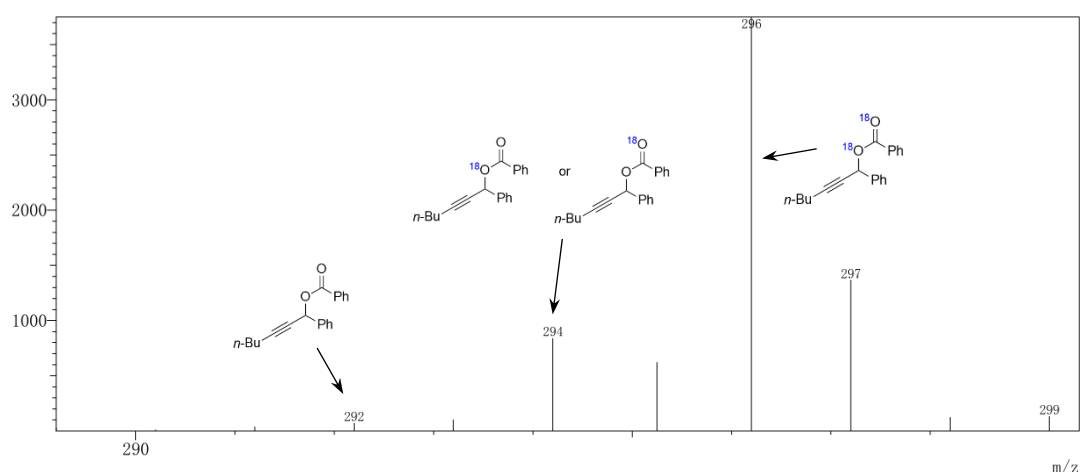

The  $\text{O}^{18}$  enrichment of compound **2b**<sup>18</sup> was determined by Gas chromatography - mass spectrometry (GC-MS) analysis to be 93%. The relative abundance of [M], [M + 2], and [M + 4] peaks are 0.02, 0.16 and 1.28, respectively. The abundance of  $^{18}\text{O}$  in **2b** is therefore calculated as:  $(1.28 + 0.16 \times 1/2) / (1.28 + 0.16 + 0.02) \times 100\% = 93\%$ .

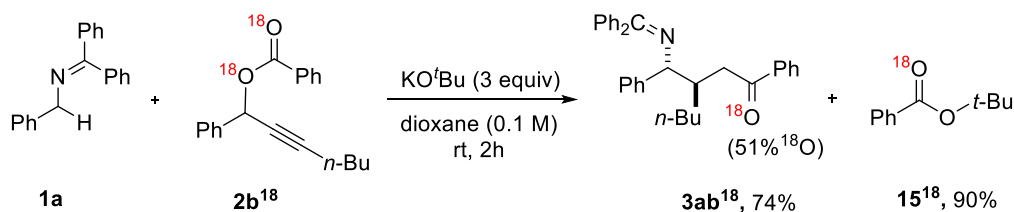

In a nitrogen-filled glove box, to an oven dried 1-dram vial with a magnetic stir bar was charged with imines **1a** (27 mg, 0.1 mmol, 1.0 equiv.), K<sup>t</sup>OBu (34 mg, 0.3 mmol, 3.0 equiv.), and 1,4 -dioxane (1 mL). The reaction mixture was stirred at room temperature for 5 minutes, and propargyl ester **2b**<sup>18</sup> (59 mg, 0.2 mmol, 2.0 equiv.) was added. The vial was capped, removed

from glovebox and stirred at rt for 2h. The reaction mixture was added via glass pipet into a 10 mL vial containing 5 mL of petroleum ether to allow the salts to precipitate. The resulting mixture was filtered through a coarse fritted glass funnel, rinsed with petroleum ether (5 mL X 2) and the filtrate was concentrated *in vacuo*. The crude was purified through SiO<sub>2</sub> flash column chromatography (0.5% triethylamine in petroleum ether), affording titled compound **3a**<sup>18</sup> (34.0 mg, 74%, 2:1 isolated dr) as a colorless film along with compound **15**<sup>18</sup> (32 mg, 90%).

The O<sup>18</sup> enrichment of compound **3ab**<sup>18</sup> was determined by HRMS analysis to be 57%. In HRMS, The relative abundance of [M], [M + 2] peaks for **3a**<sup>18</sup> were 76 and 100, respectively. The O<sup>18</sup> content was calculated as  $100/(76+100) \times 100\% = 57\%$ .

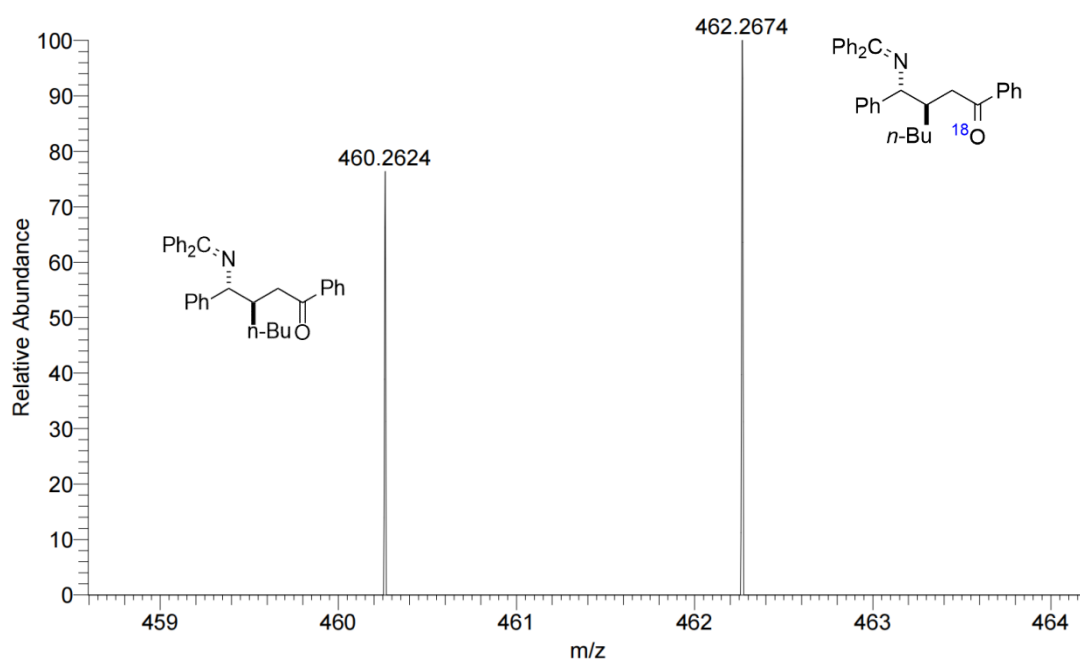

#### 4. X-Ray Analysis of Compound 3af

The X-ray crystal structure of **3af** (CCDC: 2407137). The crystal was obtained by slow evaporation of a solution of dichloromethane and petroleum ether.

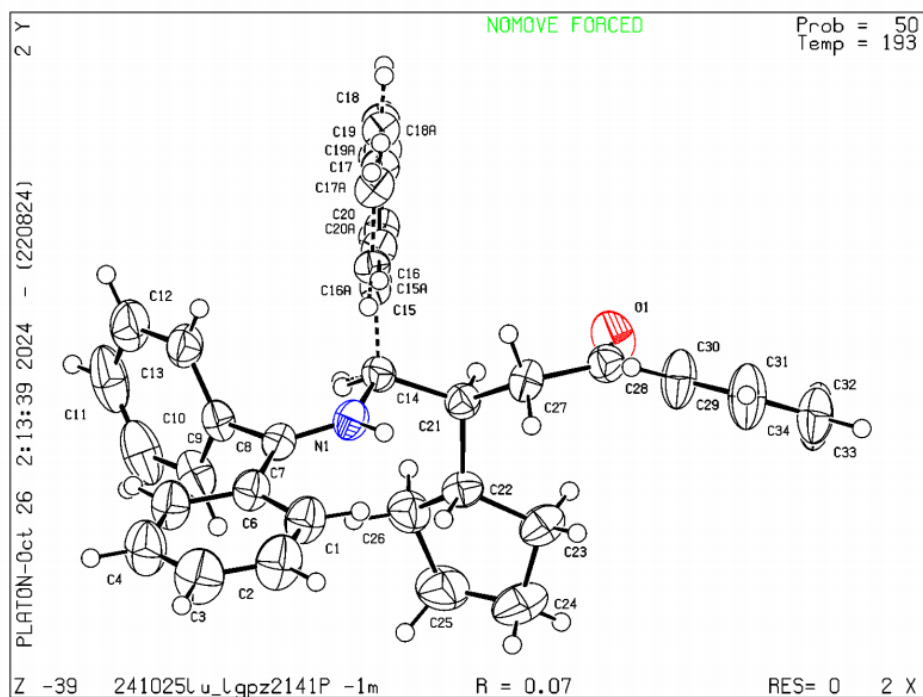

**Table 1 Crystal data and structure refinement for 241025LU\_LGPZ214150\_0m.**

|                                                |                                                                |
|------------------------------------------------|----------------------------------------------------------------|
| Identification code                            | <b>3af</b>                                                     |
| Empirical formula                              | C <sub>34</sub> H <sub>34</sub> NO                             |
| Formula weight                                 | 472.62                                                         |
| Temperature/K                                  | 193.00                                                         |
| Crystal system                                 | triclinic                                                      |
| Space group                                    | P-1                                                            |
| a/Å                                            | 9.2433(5)                                                      |
| b/Å                                            | 11.6116(7)                                                     |
| c/Å                                            | 13.7296(8)                                                     |
| $\alpha/^\circ$                                | 72.825(2)                                                      |
| $\beta/^\circ$                                 | 80.564(2)                                                      |
| $\gamma/^\circ$                                | 69.791(2)                                                      |
| Volume/Å <sup>3</sup>                          | 1318.05(13)                                                    |
| Z                                              | 2                                                              |
| $\rho_{\text{calc}}/\text{cm}^3$               | 1.191                                                          |
| $\mu/\text{mm}^{-1}$                           | 0.070                                                          |
| F(000)                                         | 506.0                                                          |
| Crystal size/mm <sup>3</sup>                   | 0.12 × 0.1 × 0.09                                              |
| Radiation                                      | MoK $\alpha$ ( $\lambda$ = 0.71073)                            |
| 2 $\Theta$ range for data collection/ $^\circ$ | 3.868 to 54.93                                                 |
| Index ranges                                   | -11 ≤ h ≤ 11, -13 ≤ k ≤ 15, -17 ≤ l ≤ 17                       |
| Reflections collected                          | 12578                                                          |
| Independent reflections                        | 5985 [ $R_{\text{int}}$ = 0.0453, $R_{\text{sigma}}$ = 0.0771] |
| Data/restraints/parameters                     | 5985/181/380                                                   |
| Goodness-of-fit on F <sup>2</sup>              | 1.028                                                          |
| Final R indexes [ $I \geq 2\sigma(I)$ ]        | $R_1$ = 0.0653, $wR_2$ = 0.1440                                |
| Final R indexes [all data]                     | $R_1$ = 0.1303, $wR_2$ = 0.1777                                |
| Largest diff. peak/hole / e Å <sup>-3</sup>    | 0.20/-0.46                                                     |

**Table 2 Fractional Atomic Coordinates ( $\times 10^4$ ) and Equivalent Isotropic Displacement Parameters ( $\text{\AA}^2 \times 10^3$ ) for 241025LU\_LGPZ214150\_0m.  $U_{\text{eq}}$  is defined as 1/3 of the trace of the orthogonalised  $U_{ij}$  tensor.**

| Atom | x        | y          | z          | $U_{\text{eq}}$ |
|------|----------|------------|------------|-----------------|
| O1   | 10482(2) | 2201.0(18) | 1282.7(13) | 62.2(5)         |
| N1   | 5046(2)  | 3113.5(17) | 3154.3(14) | 41.0(5)         |
| C1   | 3492(3)  | 1777(2)    | 4808.5(19) | 54.0(7)         |
| C2   | 2701(4)  | 1224(3)    | 5661(2)    | 69.0(9)         |
| C3   | 1141(4)  | 1770(3)    | 5847(2)    | 72.1(9)         |
| C4   | 362(3)   | 2876(3)    | 5178(2)    | 68.7(8)         |
| C5   | 1135(3)  | 3446(3)    | 4328.1(19) | 55.2(7)         |
| C6   | 2721(3)  | 2902(2)    | 4138.4(18) | 44.0(6)         |
| C7   | 3576(3)  | 3528(2)    | 3240.1(16) | 37.8(5)         |
| C8   | 2637(2)  | 4645(2)    | 2480.8(17) | 40.2(5)         |
| C9   | 1913(3)  | 4479(3)    | 1749(2)    | 57.1(7)         |
| C10  | 1085(3)  | 5530(4)    | 1029(2)    | 74.7(10)        |
| C11  | 958(3)   | 6720(4)    | 1060(3)    | 79.9(11)        |
| C12  | 1637(3)  | 6902(3)    | 1787(3)    | 72.1(9)         |

|      |          |          |            |          |
|------|----------|----------|------------|----------|
| C13  | 2489(3)  | 5866(2)  | 2501(2)    | 52.2(7)  |
| C14  | 5889(2)  | 3710(2)  | 2263.3(17) | 38.2(5)  |
| C15  | 6425(14) | 4744(9)  | 2387(6)    | 39.6(17) |
| C16  | 6645(8)  | 4831(6)  | 3336(6)    | 49.0(15) |
| C16A | 6388(15) | 4563(12) | 3665(10)   | 45(2)    |
| C17  | 7182(6)  | 5761(6)  | 3438(5)    | 53.3(15) |
| C17A | 6921(12) | 5389(10) | 3959(10)   | 58(2)    |
| C18  | 7521(6)  | 6607(6)  | 2573(6)    | 56.5(16) |
| C18A | 7438(12) | 6285(12) | 3185(13)   | 56(2)    |
| C19  | 7271(6)  | 6572(5)  | 1601(6)    | 53.8(14) |
| C19A | 7393(13) | 6395(12) | 2158(11)   | 53(2)    |
| C20  | 6727(8)  | 5638(7)  | 1521(5)    | 43.5(13) |
| C20A | 6883(16) | 5551(15) | 1909(10)   | 51(2)    |
| C21  | 7275(2)  | 2689(2)  | 1896.4(17) | 38.2(5)  |
| C22  | 6728(3)  | 1728(2)  | 1623.8(17) | 42.3(6)  |
| C23  | 7979(3)  | 647(2)   | 1260(2)    | 54.0(7)  |
| C24  | 7089(4)  | 90(3)    | 798(3)     | 76.5(9)  |
| C25  | 5791(4)  | 1222(3)  | 280(3)     | 75.9(9)  |
| C26  | 5633(3)  | 2299(3)  | 758(2)     | 54.7(7)  |
| C27  | 8541(3)  | 2044(2)  | 2649.5(17) | 43.0(6)  |
| C28  | 10150(3) | 1645(2)  | 2144.4(18) | 42.4(6)  |
| C29  | 11353(2) | 540(2)   | 2723.6(17) | 39.1(5)  |
| C30  | 11310(3) | 167(3)   | 3770.1(19) | 61.2(8)  |
| C31  | 12436(3) | -890(3)  | 4270(2)    | 71.2(9)  |
| C32  | 13589(3) | -1596(3) | 3732(2)    | 64.4(8)  |
| C33  | 13639(3) | -1240(3) | 2696(2)    | 78.4(10) |
| C34  | 12552(3) | -171(3)  | 2193(2)    | 65.0(8)  |

**Table 3 Anisotropic Displacement Parameters ( $\text{\AA}^2 \times 10^3$ ) for 241025LU\_LGPZ214150\_0m.**

The Anisotropic displacement factor exponent takes the form: -

$$2\pi^2[h2a*2U11+2hka*b*U12+...].$$

| Atom | U11      | U22      | U33      | U23       |
|------|----------|----------|----------|-----------|
| O1   | 51.7(11) | 71.0(13) | 49.1(11) | 7.2(10)   |
| N1   | 41.8(11) | 36.1(10) | 38.0(11) | -4.6(9)   |
| C1   | 55.5(15) | 48.5(15) | 45.3(14) | -3.2(12)  |
| C2   | 73(2)    | 59.1(18) | 50.2(17) | 7.2(14)   |
| C3   | 75(2)    | 75(2)    | 49.7(17) | -1.2(16)  |
| C4   | 54.1(17) | 73(2)    | 60.2(18) | -8.3(16)  |
| C5   | 47.9(15) | 53.4(16) | 49.0(15) | -3.3(13)  |
| C6   | 44.5(13) | 41.4(13) | 39.6(13) | -6.7(11)  |
| C7   | 37.5(12) | 35.9(12) | 37.8(12) | -11.2(10) |
| C8   | 30.6(11) | 46.4(14) | 37.4(12) | -4.5(11)  |
| C9   | 39.4(14) | 76.4(19) | 55.3(16) | -19.7(15) |
| C10  | 43.5(16) | 121(3)   | 44.9(17) | -10.4(19) |
| C11  | 39.1(16) | 97(3)    | 61(2)    | 23.8(19)  |
| C12  | 48.8(16) | 47.2(16) | 91(2)    | 13.3(16)  |
| C13  | 42.0(14) | 41.8(14) | 62.1(17) | -5.8(13)  |
| C14  | 33.8(11) | 34.9(12) | 43.1(13) | -4.7(10)  |
| C15  | 28(2)    | 33(3)    | 55(4)    | -17(3)    |
| C15A | 27(3)    | 35(4)    | 67(5)    | -17(4)    |
| C16  | 40(2)    | 40(3)    | 67(4)    | -19(2)    |
| C16A | 40(4)    | 39(4)    | 63(5)    | -23(4)    |
| C17  | 42(2)    | 51(3)    | 75(4)    | -30(3)    |
| C17A | 51(4)    | 45(4)    | 79(5)    | -24(4)    |
| C18  | 42(2)    | 50(3)    | 90(5)    | -36(3)    |
| C18A | 42(4)    | 44(5)    | 85(5)    | -25(5)    |



|      |          |          |          |           |
|------|----------|----------|----------|-----------|
| C19  | 42(2)    | 41(2)    | 79(4)    | -20(3)    |
| C19A | 42(3)    | 46(4)    | 76(5)    | -26(4)    |
| C20  | 33(2)    | 37(2)    | 61(3)    | -15(3)    |
| C20A | 40(3)    | 42(3)    | 69(5)    | -20(4)    |
| C21  | 38.0(12) | 36.0(12) | 38.5(12) | -7.0(10)  |
| C22  | 51.3(14) | 41.2(13) | 37.2(13) | -11.3(11) |
| C23  | 68.7(18) | 45.1(14) | 48.7(15) | -16.0(12) |
| C24  | 103(3)   | 57.1(19) | 82(2)    | -32.1(17) |
| C25  | 81(2)    | 89(2)    | 81(2)    | -44(2)    |
| C26  | 51.6(15) | 64.3(17) | 55.7(16) | -23.8(14) |
| C27  | 41.8(13) | 40.6(13) | 40.1(13) | -11.6(11) |
| C28  | 41.2(13) | 42.9(13) | 43.3(14) | -12.2(11) |
| C29  | 34.1(12) | 43.7(13) | 38.7(13) | -14.8(11) |
| C30  | 48.5(15) | 75.8(19) | 40.4(15) | -21.9(14) |
| C31  | 53.9(17) | 87(2)    | 40.9(15) | -7.0(15)  |
| C32  | 47.0(15) | 65.4(18) | 63.4(19) | -15.4(15) |
| C33  | 54.7(18) | 96(2)    | 61.1(19) | -37.2(18) |
| C34  | 45.7(15) | 89(2)    | 40.5(14) | -20.7(15) |

**Table 4 Bond Lengths for 241025LU\_LGPZ214150\_0m.**

| Atom | Atom | Length/Å  | Atom | Atom | Length/Å  |
|------|------|-----------|------|------|-----------|
| O1   | C28  | 1.215(3)  | C16  | C17  | 1.383(9)  |
| N1   | C7   | 1.273(3)  | C16A | C17A | 1.395(17) |
| N1   | C14  | 1.463(3)  | C17  | C18  | 1.370(8)  |
| C1   | C2   | 1.384(3)  | C17A | C18A | 1.401(14) |
| C1   | C6   | 1.387(3)  | C18  | C19  | 1.406(8)  |
| C2   | C3   | 1.375(4)  | C18A | C19A | 1.384(17) |
| C3   | C4   | 1.376(4)  | C19  | C20  | 1.381(9)  |
| C4   | C5   | 1.381(3)  | C19A | C20A | 1.367(19) |
| C5   | C6   | 1.396(3)  | C21  | C22  | 1.530(3)  |
| C6   | C7   | 1.491(3)  | C21  | C27  | 1.527(3)  |
| C7   | C8   | 1.498(3)  | C22  | C23  | 1.530(3)  |
| C8   | C9   | 1.385(3)  | C22  | C26  | 1.530(3)  |
| C8   | C13  | 1.385(3)  | C23  | C24  | 1.510(4)  |
| C9   | C10  | 1.394(4)  | C24  | C25  | 1.520(4)  |
| C10  | C11  | 1.359(5)  | C25  | C26  | 1.530(4)  |
| C11  | C12  | 1.362(5)  | C27  | C28  | 1.511(3)  |
| C12  | C13  | 1.390(4)  | C28  | C29  | 1.489(3)  |
| C14  | C15  | 1.508(7)  | C29  | C30  | 1.371(3)  |
| C14  | C15A | 1.533(13) | C29  | C34  | 1.378(3)  |
| C14  | C21  | 1.547(3)  | C30  | C31  | 1.383(3)  |
| C15  | C16  | 1.388(9)  | C31  | C32  | 1.360(4)  |
| C15  | C20  | 1.390(9)  | C32  | C33  | 1.357(4)  |
| C15A | C16A | 1.379(19) | C33  | C34  | 1.373(4)  |
| C15A | C20A | 1.398(19) |      |      |           |

**Table 5 Bond Angles for 241025LU\_LGPZ214150\_0m.**

| Atom | Atom | Atom | Angle/°    | Atom | Atom | Atom | Angle/°   |
|------|------|------|------------|------|------|------|-----------|
| C7   | N1   | C14  | 119.83(19) | C15A | C16A | C17A | 121.1(10) |
| C2   | C1   | C6   | 120.2(3)   | C18  | C17  | C16  | 118.6(6)  |
| C3   | C2   | C1   | 120.6(3)   | C16A | C17A | C18A | 117.7(10) |
| C2   | C3   | C4   | 119.5(3)   | C17  | C18  | C19  | 121.1(5)  |
| C3   | C4   | C5   | 120.6(3)   | C19A | C18A | C17A | 122.5(11) |
| C4   | C5   | C6   | 120.1(3)   | C20  | C19  | C18  | 119.1(5)  |
| C1   | C6   | C5   | 118.8(2)   | C20A | C19A | C18A | 117.6(11) |
| C1   | C6   | C7   | 120.5(2)   | C19  | C20  | C15  | 120.8(5)  |
| C5   | C6   | C7   | 120.6(2)   | C19A | C20A | C15A | 122.5(11) |

|      |      |      |            |     |     |     |            |
|------|------|------|------------|-----|-----|-----|------------|
| N1   | C7   | C6   | 119.7(2)   | C22 | C21 | C14 | 110.67(18) |
| N1   | C7   | C8   | 123.1(2)   | C27 | C21 | C14 | 113.06(18) |
| C6   | C7   | C8   | 117.24(19) | C27 | C21 | C22 | 112.12(19) |
| C9   | C8   | C7   | 121.0(2)   | C21 | C22 | C26 | 114.47(19) |
| C13  | C8   | C7   | 120.0(2)   | C23 | C22 | C21 | 116.6(2)   |
| C13  | C8   | C9   | 119.0(2)   | C23 | C22 | C26 | 102.47(19) |
| C8   | C9   | C10  | 120.1(3)   | C24 | C23 | C22 | 103.9(2)   |
| C11  | C10  | C9   | 119.9(3)   | C23 | C24 | C25 | 104.9(2)   |
| C10  | C11  | C12  | 120.7(3)   | C24 | C25 | C26 | 106.2(2)   |
| C11  | C12  | C13  | 120.2(3)   | C22 | C26 | C25 | 106.5(2)   |
| C8   | C13  | C12  | 120.0(3)   | C28 | C27 | C21 | 113.73(19) |
| N1   | C14  | C15  | 116.2(3)   | O1  | C28 | C27 | 121.7(2)   |
| N1   | C14  | C15A | 103.6(7)   | O1  | C28 | C29 | 119.5(2)   |
| N1   | C14  | C21  | 110.30(17) | C29 | C28 | C27 | 118.7(2)   |
| C15  | C14  | C21  | 109.7(5)   | C30 | C29 | C28 | 123.1(2)   |
| C15A | C14  | C21  | 113.8(9)   | C30 | C29 | C34 | 117.7(2)   |
| C16  | C15  | C14  | 122.5(6)   | C34 | C29 | C28 | 119.1(2)   |
| C16  | C15  | C20  | 118.4(6)   | C29 | C30 | C31 | 120.7(2)   |
| C20  | C15  | C14  | 119.1(6)   | C32 | C31 | C30 | 120.6(3)   |
| C16A | C15A | C14  | 124.2(12)  | C33 | C32 | C31 | 119.2(3)   |
| C16A | C15A | C20A | 118.6(11)  | C32 | C33 | C34 | 120.6(3)   |
| C20A | C15A | C14  | 117.0(12)  | C33 | C34 | C29 | 121.1(2)   |
| C17  | C16  | C15  | 122.0(5)   |     |     |     |            |

**Table 6 Torsion Angles for 241025LU\_LGPZ214150\_0m.**

| A  | B   | C    | D    | Angle/°    | A    | B    | C    | D    | Angle/°     |
|----|-----|------|------|------------|------|------|------|------|-------------|
| O1 | C28 | C29  | C30  | 154.2(3)   | C14  | C21  | C27  | C28  | -147.80(19) |
| O1 | C28 | C29  | C34  | -27.7(3)   | C15  | C14  | C21  | C22  | -172.2(4)   |
| N1 | C7  | C8   | C9   | 101.1(3)   | C15  | C14  | C21  | C27  | 61.1(4)     |
| N1 | C7  | C8   | C13  | -78.6(3)   | C15  | C16  | C17  | C18  | -0.8(9)     |
| N1 | C14 | C15  | C16  | 23.1(11)   | C15A | C14  | C21  | C22  | 174.5(8)    |
| N1 | C14 | C15  | C20  | -157.5(6)  | C15A | C14  | C21  | C27  | 47.8(8)     |
| N1 | C14 | C15A | C16A | 19(2)      | C15A | C16A | C17A | C18A | -0.7(17)    |
| N1 | C14 | C15A | C20A | -166.2(14) | C16  | C15  | C20  | C19  | 1.7(11)     |
| N1 | C14 | C21  | C22  | 58.6(2)    | C16  | C17  | C18  | C19  | 2.6(8)      |
| N1 | C14 | C21  | C27  | -68.1(2)   | C16A | C15A | C20A | C19A | -2(2)       |
| C1 | C2  | C3   | C4   | 0.1(5)     | C16A | C17A | C18A | C19A | 1.9(16)     |
| C1 | C6  | C7   | N1   | -8.5(3)    | C17  | C18  | C19  | C20  | -2.3(8)     |
| C1 | C6  | C7   | C8   | 172.4(2)   | C17A | C18A | C19A | C20A | -2.9(17)    |
| C2 | C1  | C6   | C5   | -1.3(4)    | C18  | C19  | C20  | C15  | 0.1(9)      |
| C2 | C1  | C6   | C7   | 177.8(2)   | C18A | C19A | C20A | C15A | 3(2)        |
| C2 | C3  | C4   | C5   | -0.6(5)    | C20  | C15  | C16  | C17  | -1.3(11)    |
| C3 | C4  | C5   | C6   | 0.2(5)     | C20A | C15A | C16A | C17A | 1(2)        |
| C4 | C5  | C6   | C1   | 0.8(4)     | C21  | C14  | C15  | C16  | -102.8(8)   |
| C4 | C5  | C6   | C7   | -178.3(2)  | C21  | C14  | C15  | C20  | 76.5(9)     |
| C5 | C6  | C7   | N1   | 170.6(2)   | C21  | C14  | C15A | C16A | -101.2(17)  |
| C5 | C6  | C7   | C8   | -8.5(3)    | C21  | C14  | C15A | C20A | 74.0(17)    |
| C6 | C1  | C2   | C3   | 0.9(5)     | C21  | C22  | C23  | C24  | -165.6(2)   |
| C6 | C7  | C8   | C9   | -79.8(3)   | C21  | C22  | C26  | C25  | 155.2(2)    |
| C6 | C7  | C8   | C13  | 100.5(2)   | C21  | C27  | C28  | O1   | 28.1(3)     |
| C7 | N1  | C14  | C15  | 93.8(6)    | C21  | C27  | C28  | C29  | -152.0(2)   |
| C7 | N1  | C14  | C15A | 97.2(10)   | C22  | C21  | C27  | C28  | 86.2(2)     |
| C7 | N1  | C14  | C21  | -140.6(2)  | C22  | C23  | C24  | C25  | 36.7(3)     |
| C7 | C8  | C9   | C10  | -177.9(2)  | C23  | C22  | C26  | C25  | 27.9(3)     |
| C7 | C8  | C13  | C12  | 179.1(2)   | C23  | C24  | C25  | C26  | -19.0(3)    |
| C8 | C9  | C10  | C11  | -1.6(4)    | C24  | C25  | C26  | C22  | -5.9(3)     |

|     |      |      |      |            |     |     |     |     |             |
|-----|------|------|------|------------|-----|-----|-----|-----|-------------|
| C9  | C8   | C13  | C12  | -0.6(3)    | C26 | C22 | C23 | C24 | -39.8(3)    |
| C9  | C10  | C11  | C12  | 0.3(4)     | C27 | C21 | C22 | C23 | -52.0(3)    |
| C10 | C11  | C12  | C13  | 0.9(4)     | C27 | C21 | C22 | C26 | -171.55(19) |
| C11 | C12  | C13  | C8   | -0.7(4)    | C27 | C28 | C29 | C30 | -25.8(4)    |
| C13 | C8   | C9   | C10  | 1.7(3)     | C27 | C28 | C29 | C34 | 152.3(2)    |
| C14 | N1   | C7   | C6   | 178.79(19) | C28 | C29 | C30 | C31 | 178.1(3)    |
| C14 | N1   | C7   | C8   | -2.1(3)    | C28 | C29 | C34 | C33 | -176.2(3)   |
| C14 | C15  | C16  | C17  | 178.0(7)   | C29 | C30 | C31 | C32 | -1.5(5)     |
| C14 | C15  | C20  | C19  | -177.7(7)  | C30 | C29 | C34 | C33 | 2.0(4)      |
| C14 | C15A | C16A | C17A | 175.8(15)  | C30 | C31 | C32 | C33 | 1.1(5)      |
| C14 | C15A | C20A | C19A | -177.2(14) | C31 | C32 | C33 | C34 | 0.9(5)      |
| C14 | C21  | C22  | C23  | -179.2(2)  | C32 | C33 | C34 | C29 | -2.4(5)     |
| C14 | C21  | C22  | C26  | 61.2(2)    | C34 | C29 | C30 | C31 | 0.0(4)      |

**Table 7 Hydrogen Atom Coordinates (Å×104) and Isotropic Displacement Parameters (Å<sup>2</sup>×103) for 241025LU\_LGPZ214150\_0m.**

| Atom | x        | y        | z       | U(eq) |
|------|----------|----------|---------|-------|
| H1   | 5554.47  | 2470.33  | 3629.49 | 49    |
| H1A  | 4567.26  | 1385.19  | 4682.46 | 65    |
| H2   | 3241.6   | 459.3    | 6121    | 83    |
| H3   | 605.14   | 1386.02  | 6433.62 | 86    |
| H4   | -718.22  | 3250.1   | 5301.32 | 82    |
| H5   | 586      | 4210.59  | 3871.79 | 66    |
| H9   | 1979.66  | 3647.86  | 1738.15 | 69    |
| H10  | 611.09   | 5414.29  | 516.19  | 90    |
| H11  | 388.78   | 7433.82  | 568.95  | 96    |
| H12  | 1526.73  | 7739.16  | 1806.2  | 87    |
| H13  | 2971.23  | 5994.71  | 3002.1  | 63    |
| H14  | 5166.12  | 4109.5   | 1701.33 | 46    |
| H14A | 5179.6   | 4193.77  | 1699.24 | 46    |
| H16  | 6420.29  | 4234.72  | 3932.13 | 59    |
| H16A | 6041.68  | 3939.65  | 4173.87 | 54    |
| H17  | 7312.42  | 5810.71  | 4095.13 | 64    |
| H17A | 6932.6   | 5346.09  | 4659.32 | 70    |
| H18  | 7930.52  | 7228.48  | 2631.02 | 68    |
| H18A | 7833.61  | 6837.83  | 3372.4  | 67    |
| H19  | 7475     | 7182.09  | 1006.92 | 65    |
| H19A | 7705.03  | 7034.06  | 1644.48 | 64    |
| H20  | 6556.06  | 5607.02  | 866.86  | 52    |
| H20A | 6887.34  | 5588.19  | 1208.1  | 61    |
| H21  | 7743.39  | 3136.42  | 1251.06 | 46    |
| H22  | 6160.8   | 1336.82  | 2246.72 | 51    |
| H23A | 8723.26  | 973.16   | 744.97  | 65    |
| H23B | 8546.6   | 5.51     | 1839.95 | 65    |
| H24A | 6667.46  | -518.04  | 1333.76 | 92    |
| H24B | 7760.06  | -356.15  | 293.98  | 92    |
| H25A | 4813.81  | 1013.4   | 398.74  | 91    |
| H25B | 6045.76  | 1469.87  | -465.32 | 91    |
| H26A | 5922.09  | 2998.52  | 242.27  | 66    |
| H26B | 4555.02  | 2638.88  | 1028.07 | 66    |
| H27A | 8496.87  | 2635.13  | 3054.56 | 52    |
| H27B | 8333.47  | 1284.88  | 3128.72 | 52    |
| H30  | 10497.42 | 639.21   | 4156.39 | 73    |
| H31  | 12402.6  | -1123.8  | 4995.23 | 85    |
| H32  | 14350.03 | -2329.18 | 4078.16 | 77    |
| H33  | 14432.38 | -1734.94 | 2315.29 | 94    |

|                                                             |           |       |           |      |           |
|-------------------------------------------------------------|-----------|-------|-----------|------|-----------|
| H34                                                         | 12628.15  | 81.68 | 1467.31   | 78   |           |
| <b>Table 8 Atomic Occupancy for 241025LU_LGPZ214150_0m.</b> |           |       |           |      |           |
| Atom                                                        | Occupancy | Atom  | Occupancy | Atom | Occupancy |
| H14                                                         | 0.652(8)  | H14A  | 0.348(8)  | C15  | 0.652(8)  |
| C15A                                                        | 0.348(8)  | C16   | 0.652(8)  | H16  | 0.652(8)  |
| C16A                                                        | 0.348(8)  | H16A  | 0.348(8)  | C17  | 0.652(8)  |
| H17                                                         | 0.652(8)  | C17A  | 0.348(8)  | H17A | 0.348(8)  |
| C18                                                         | 0.652(8)  | H18   | 0.652(8)  | C18A | 0.348(8)  |
| H18A                                                        | 0.348(8)  | C19   | 0.652(8)  | H19  | 0.652(8)  |
| C19A                                                        | 0.348(8)  | H19A  | 0.348(8)  | C20  | 0.652(8)  |
| H20                                                         | 0.652(8)  | C20A  | 0.348(8)  | H20A | 0.348(8)  |

## 5. NMR Spectra

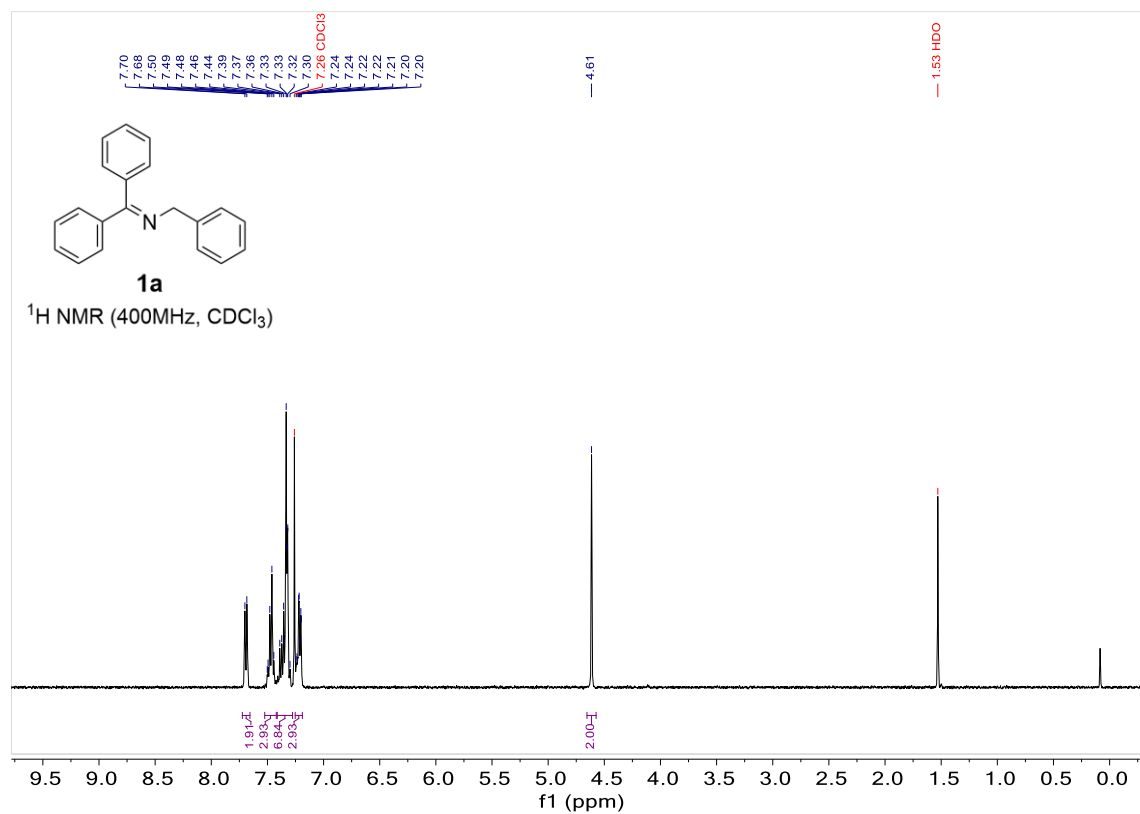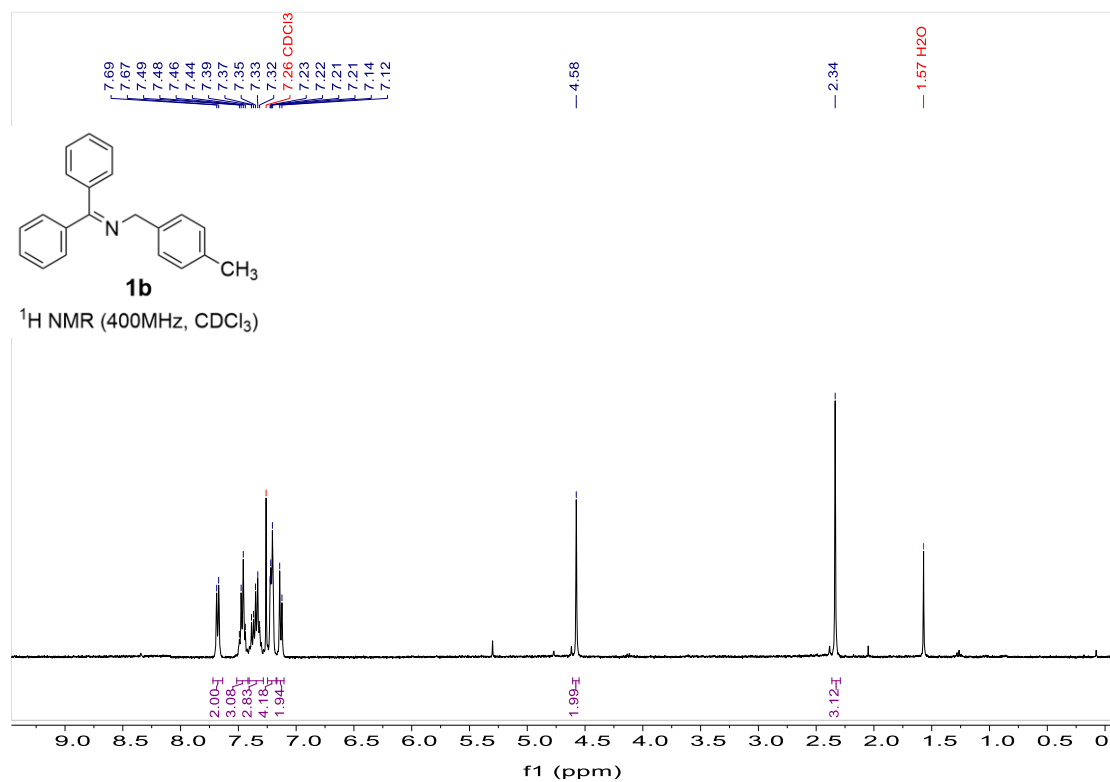

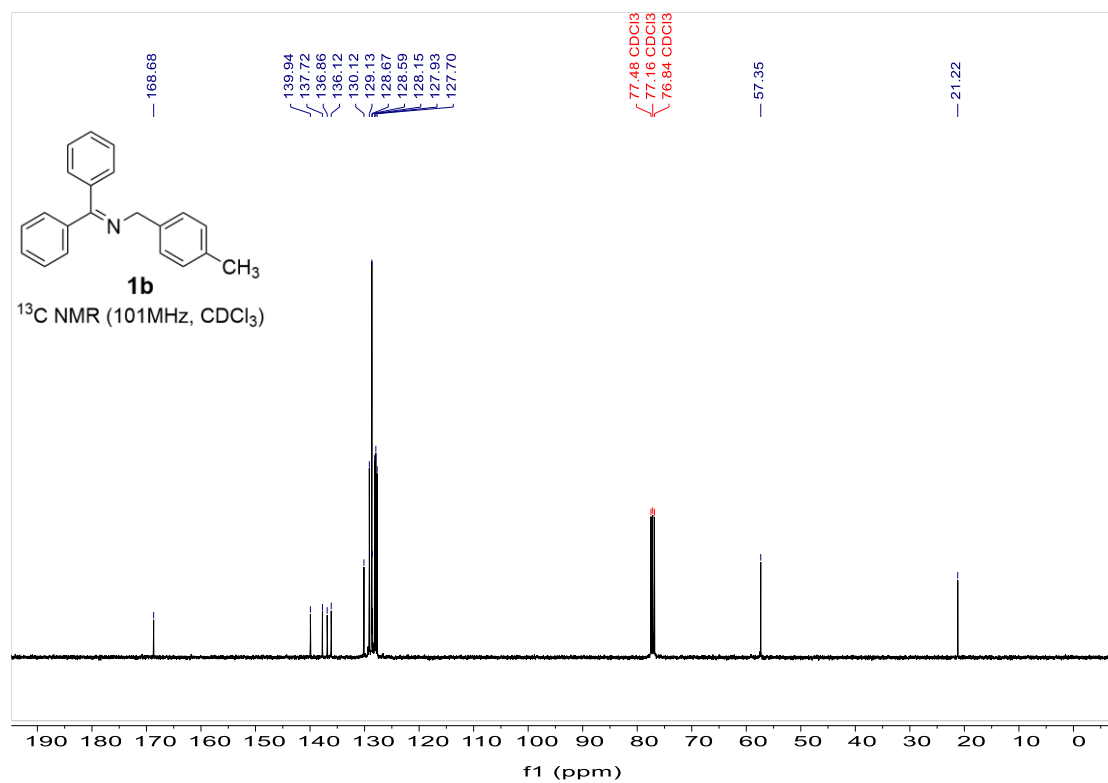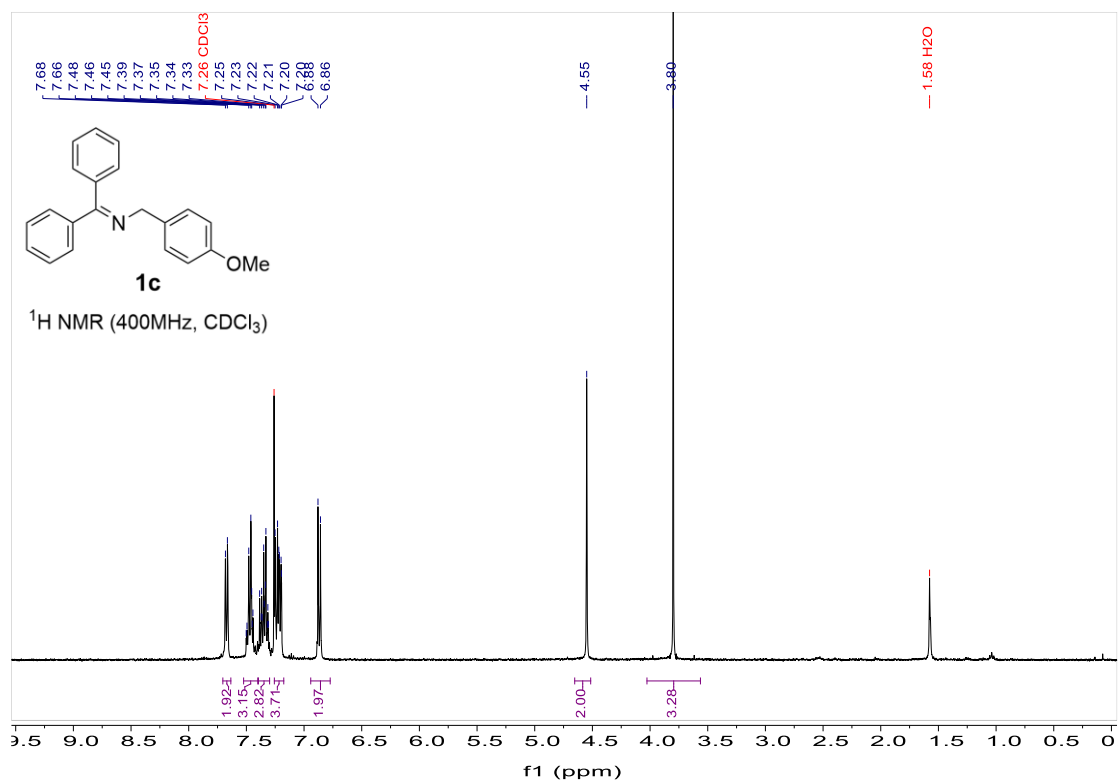

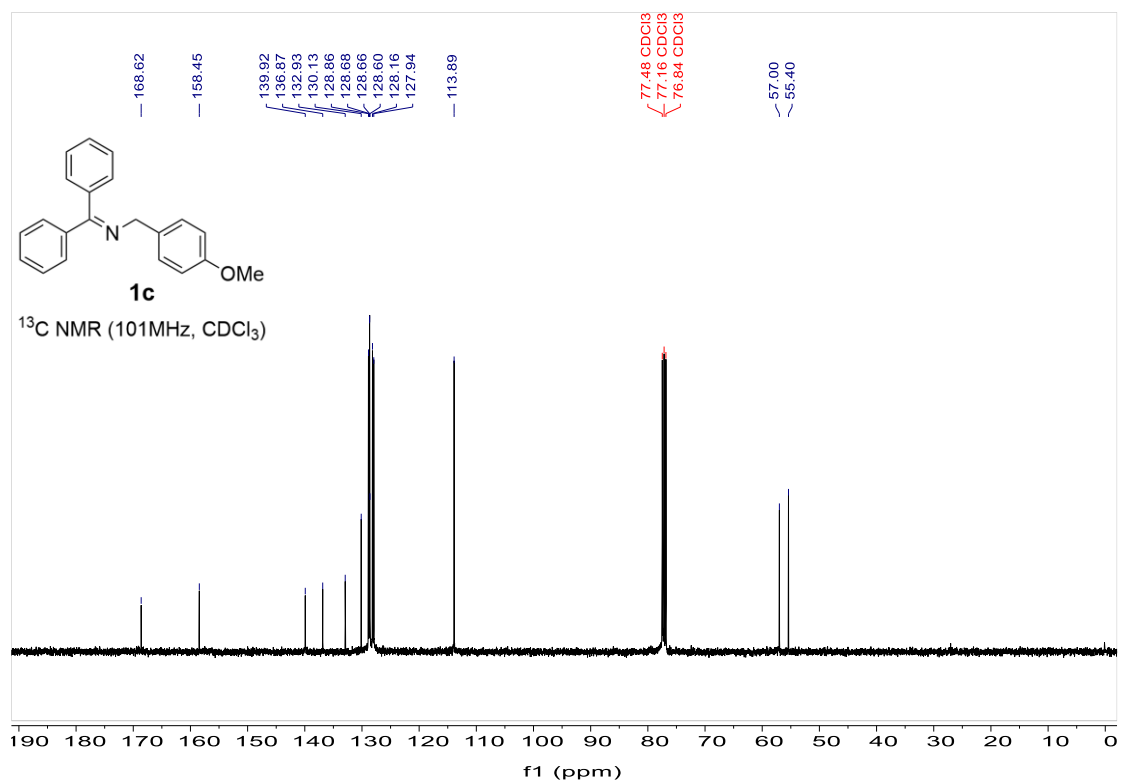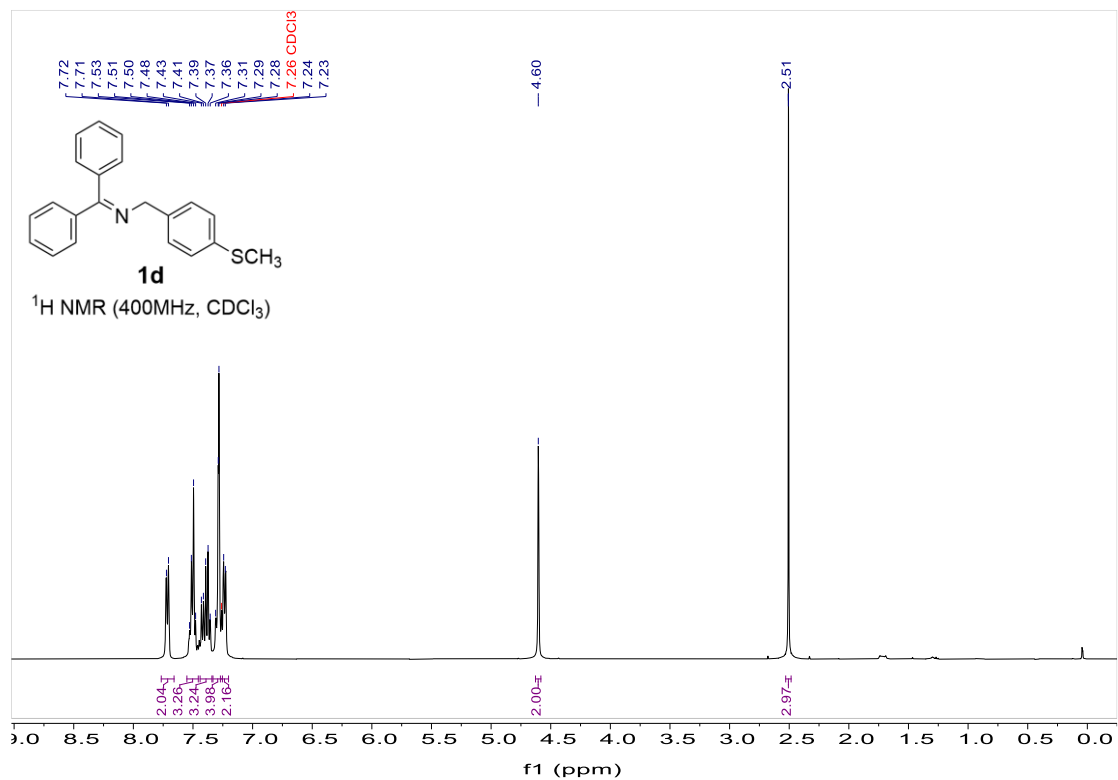

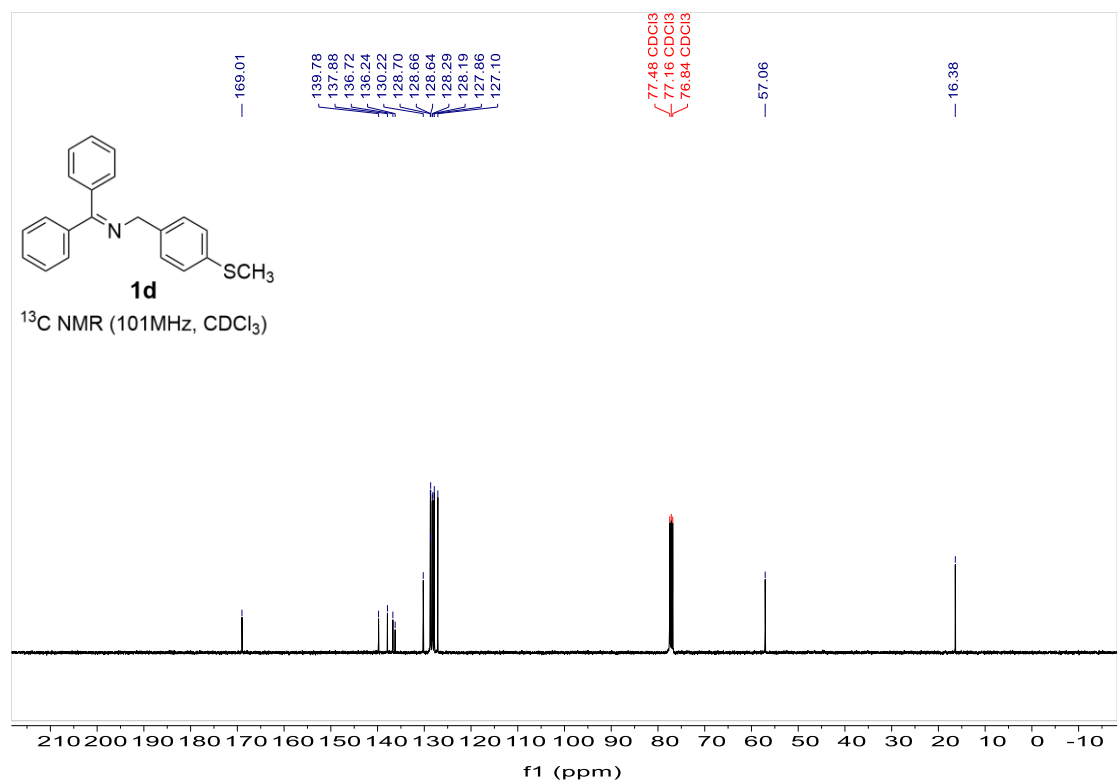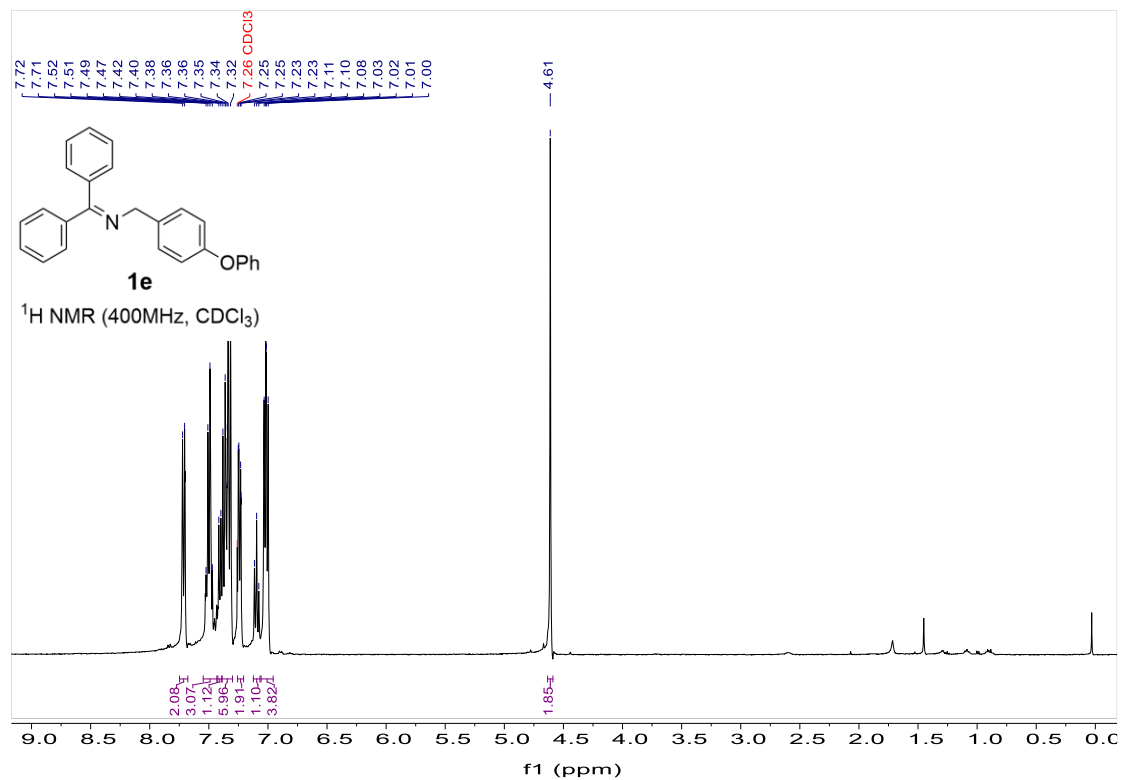



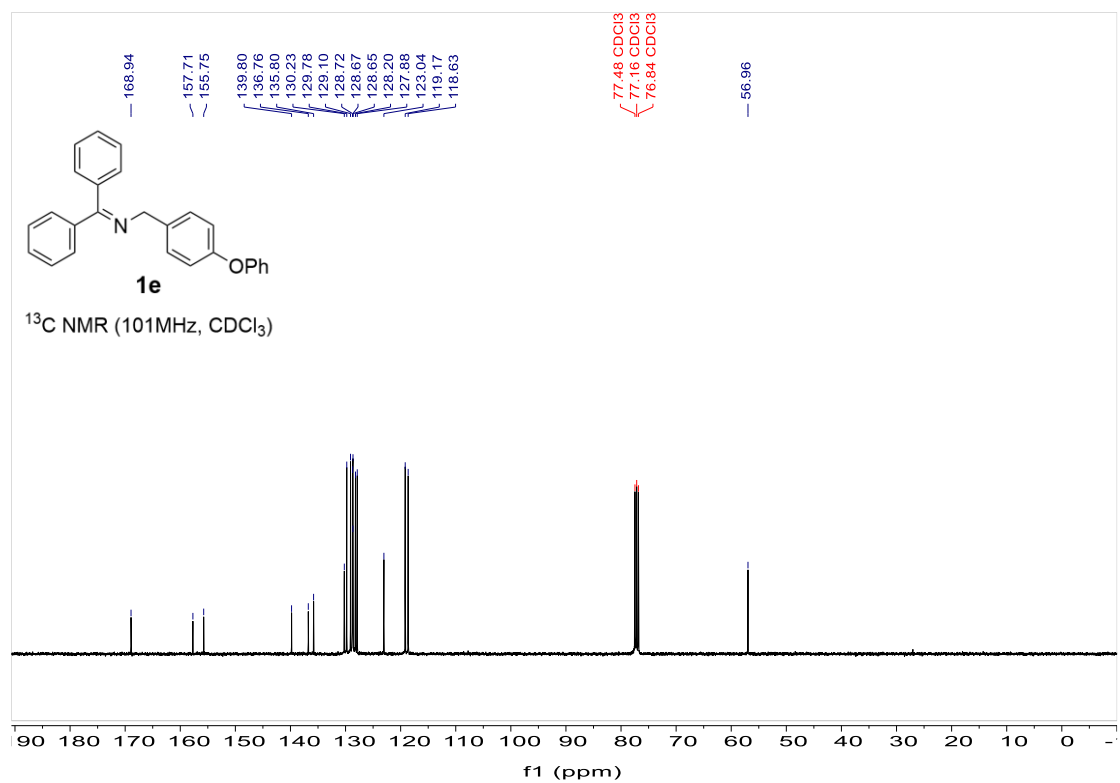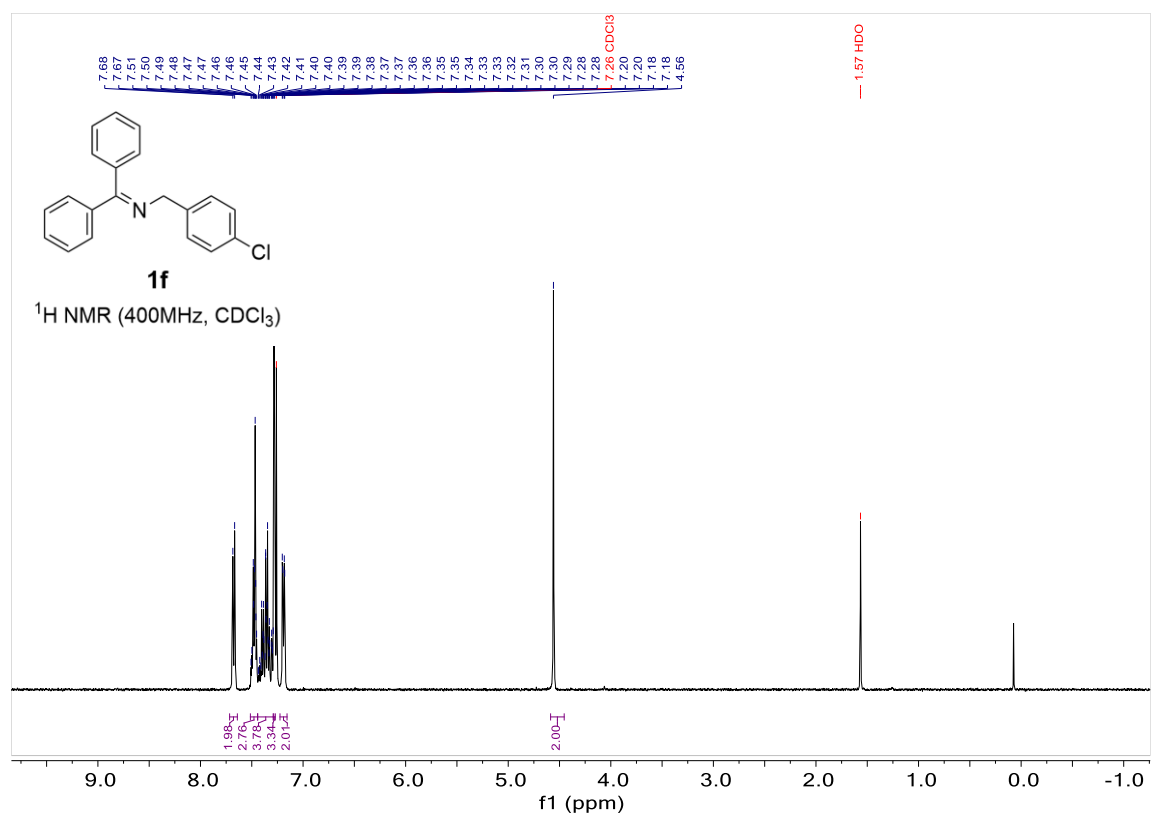

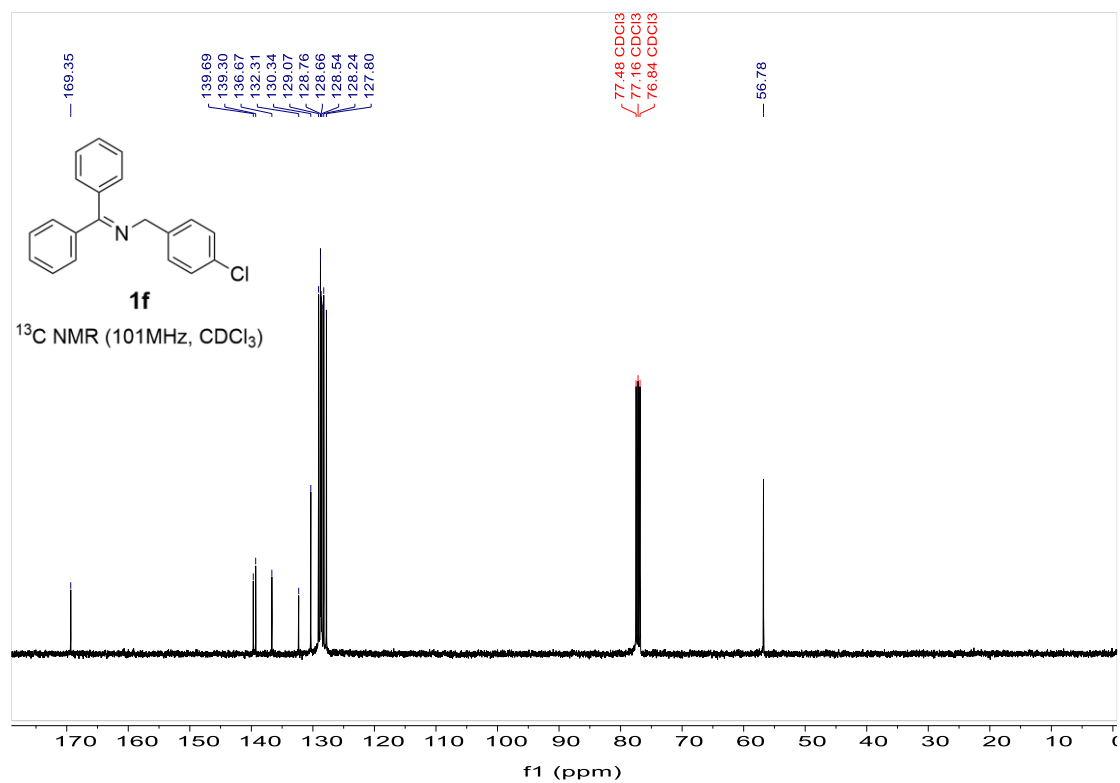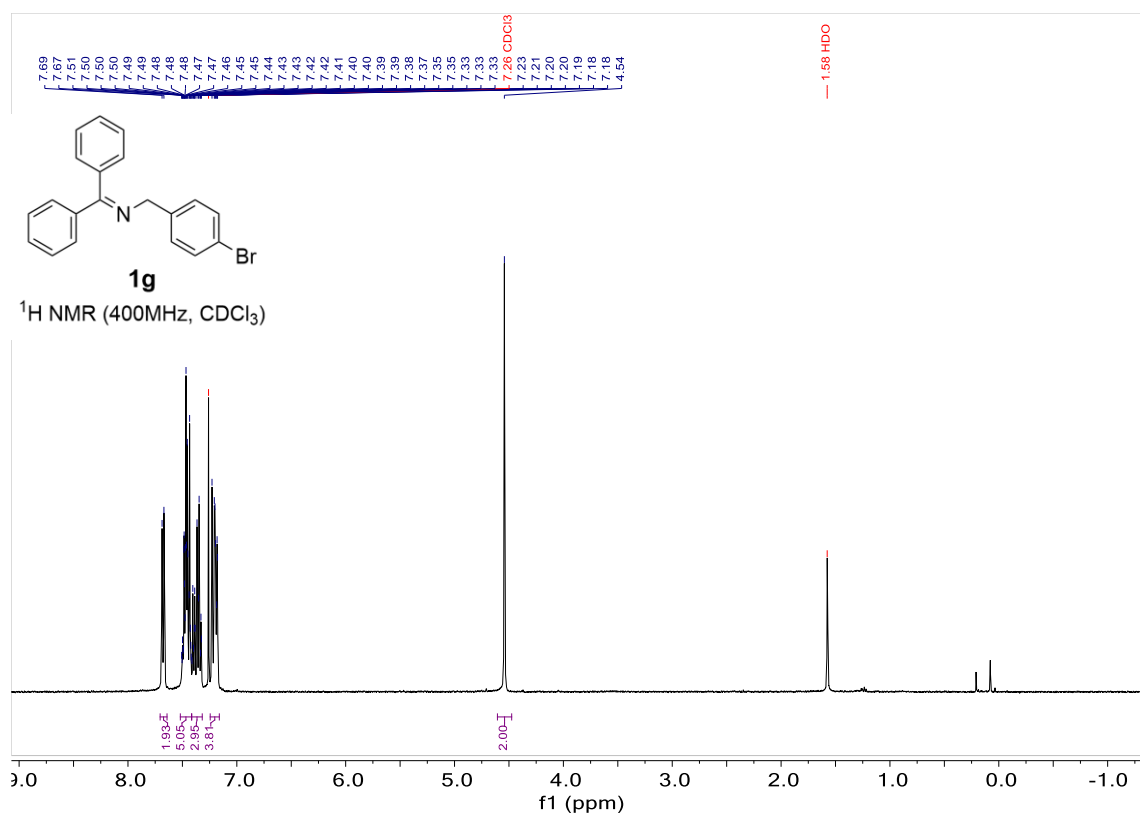

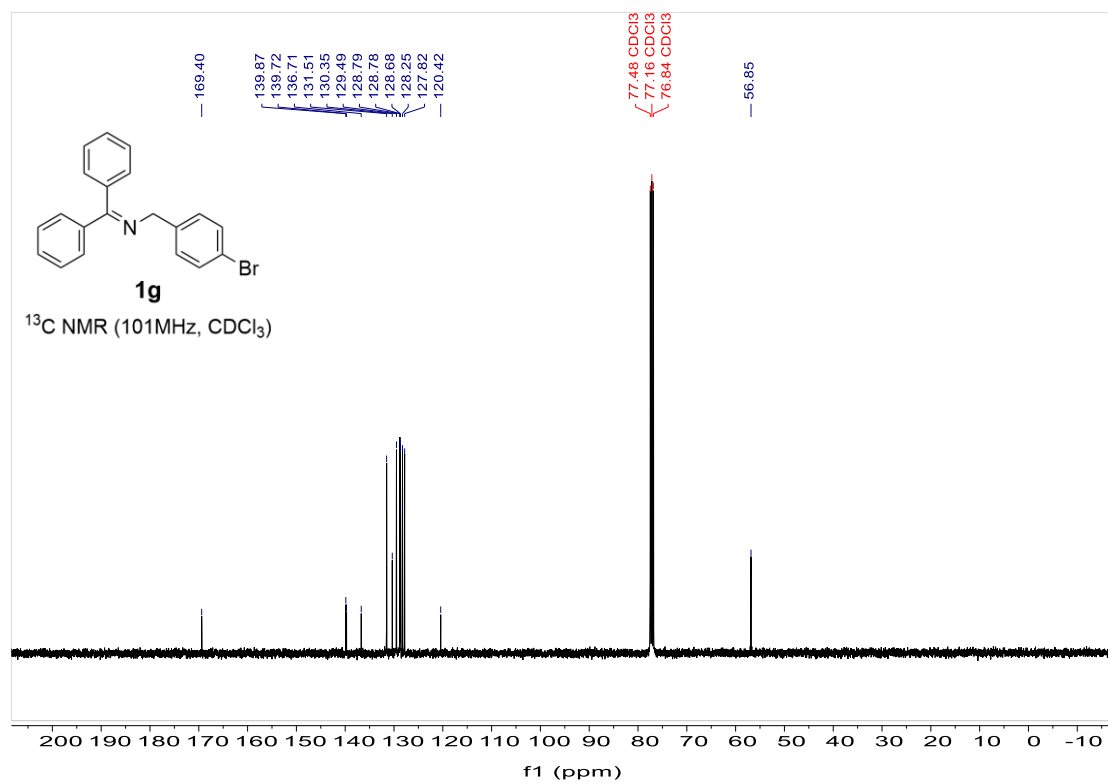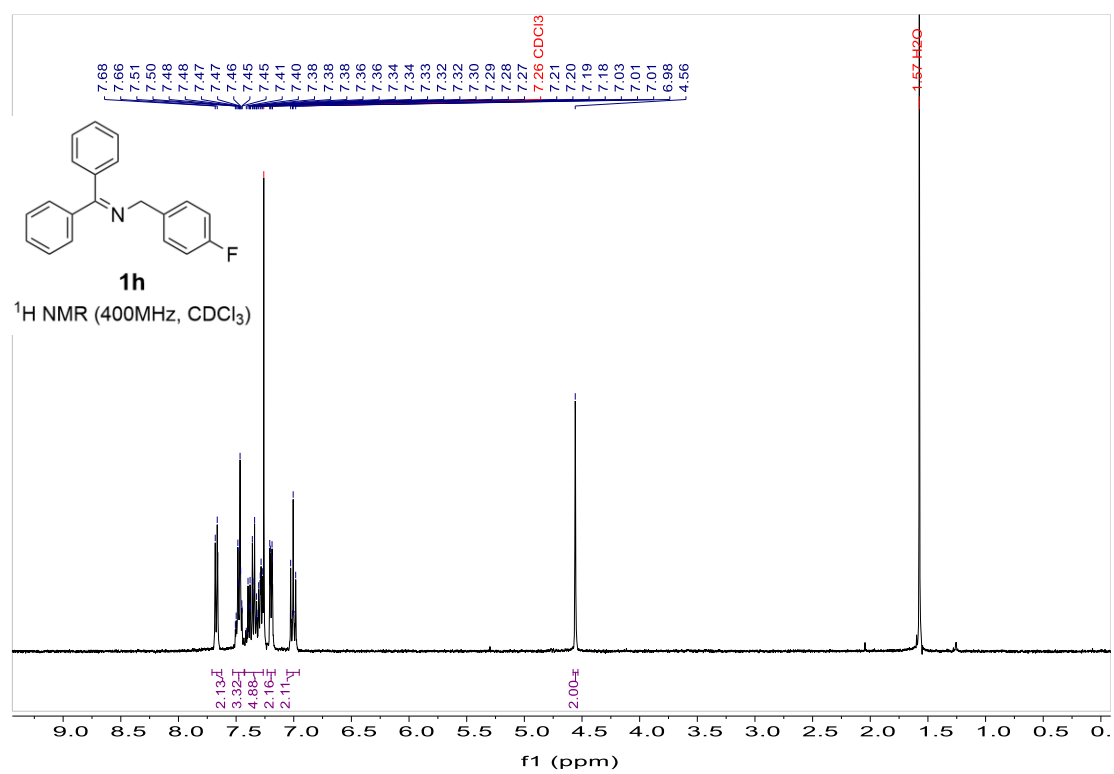

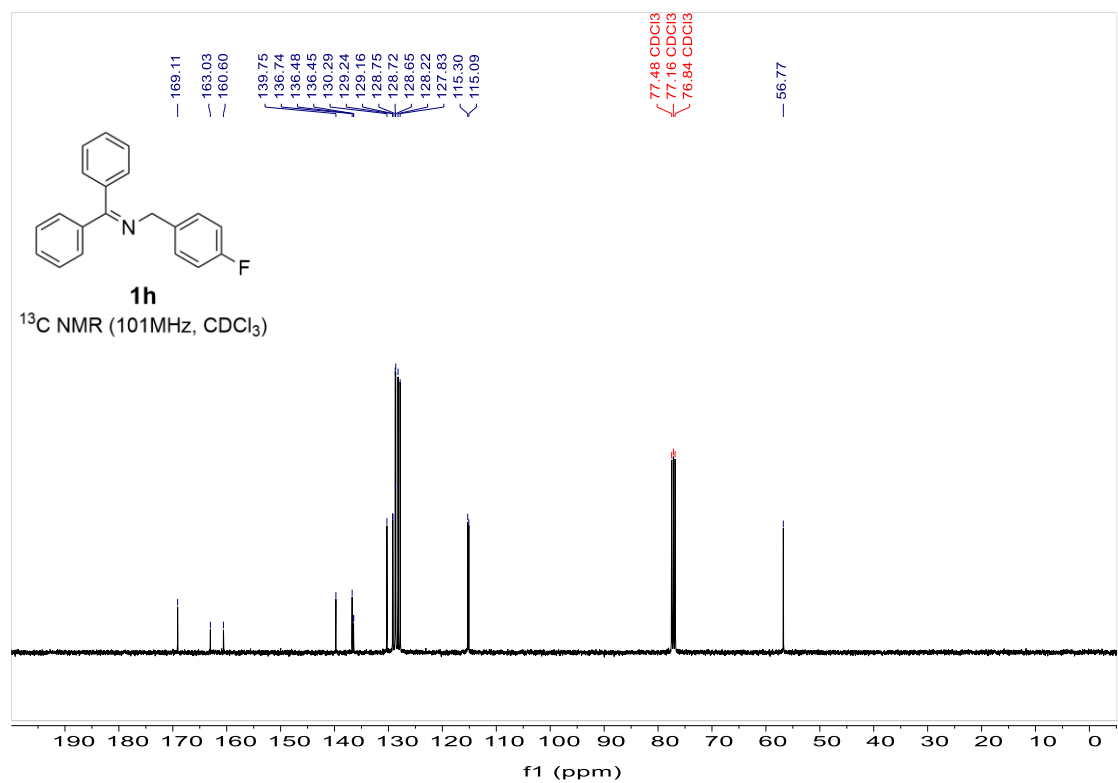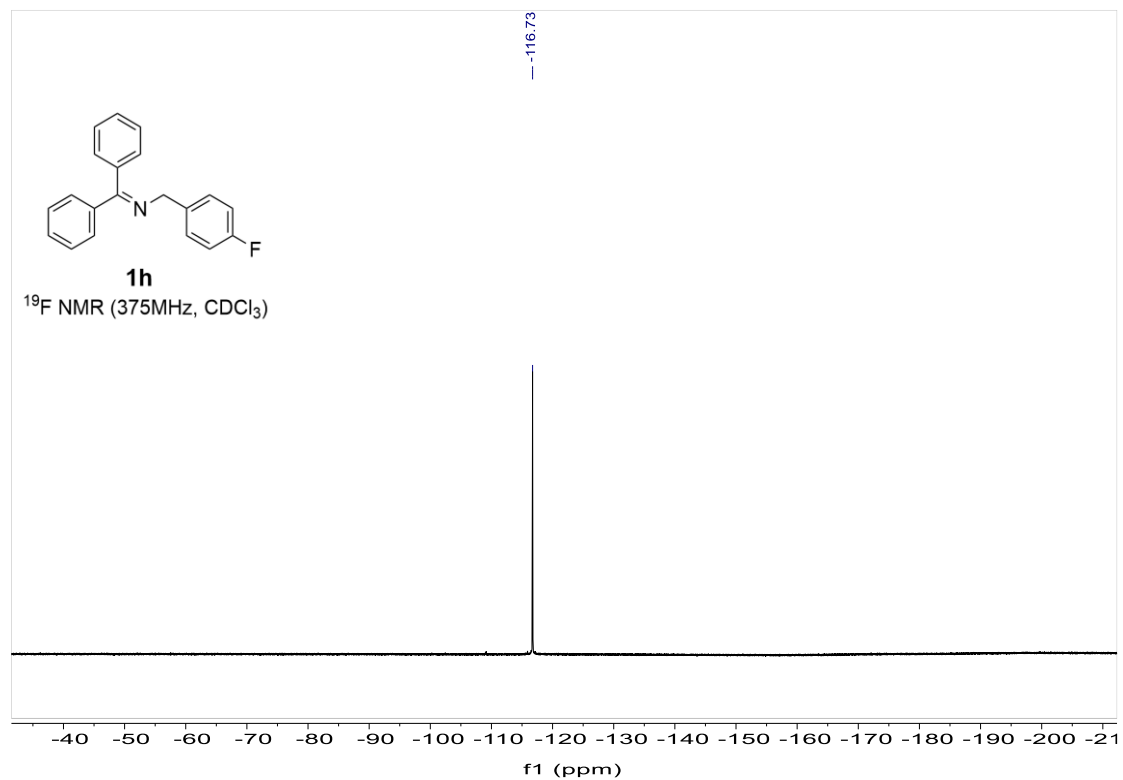

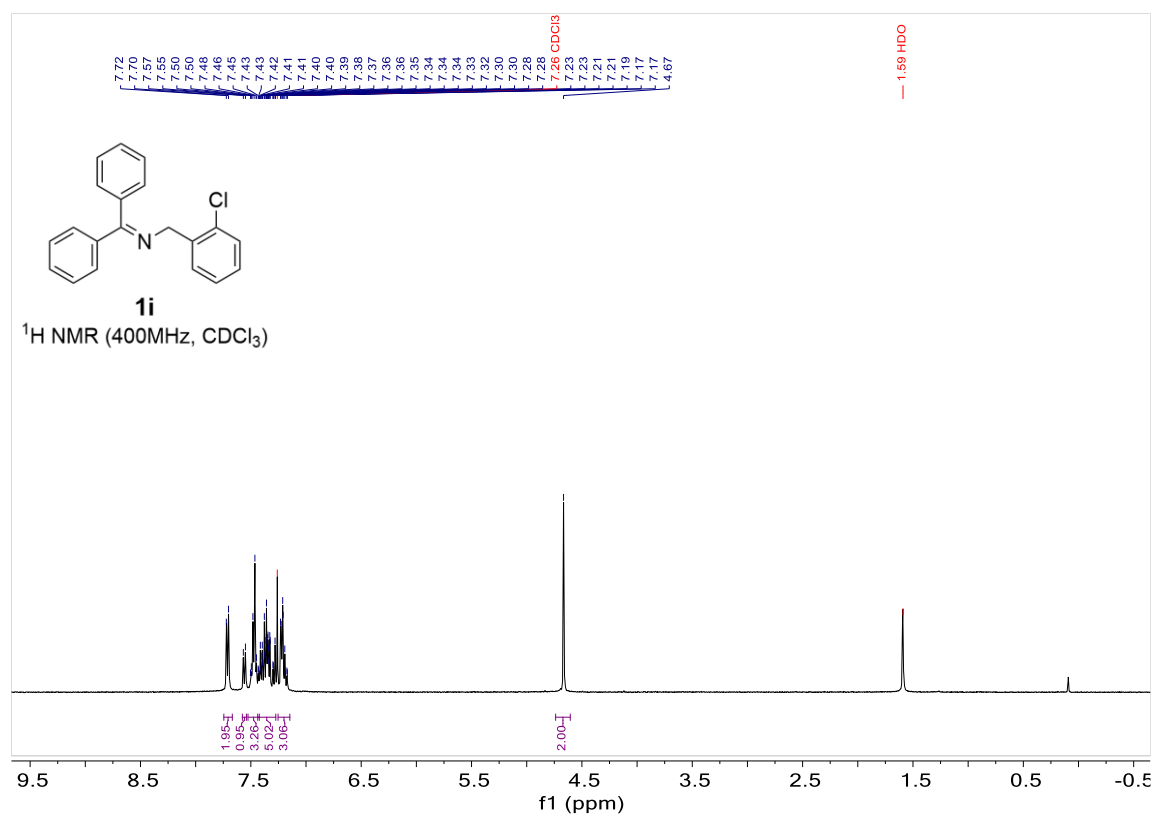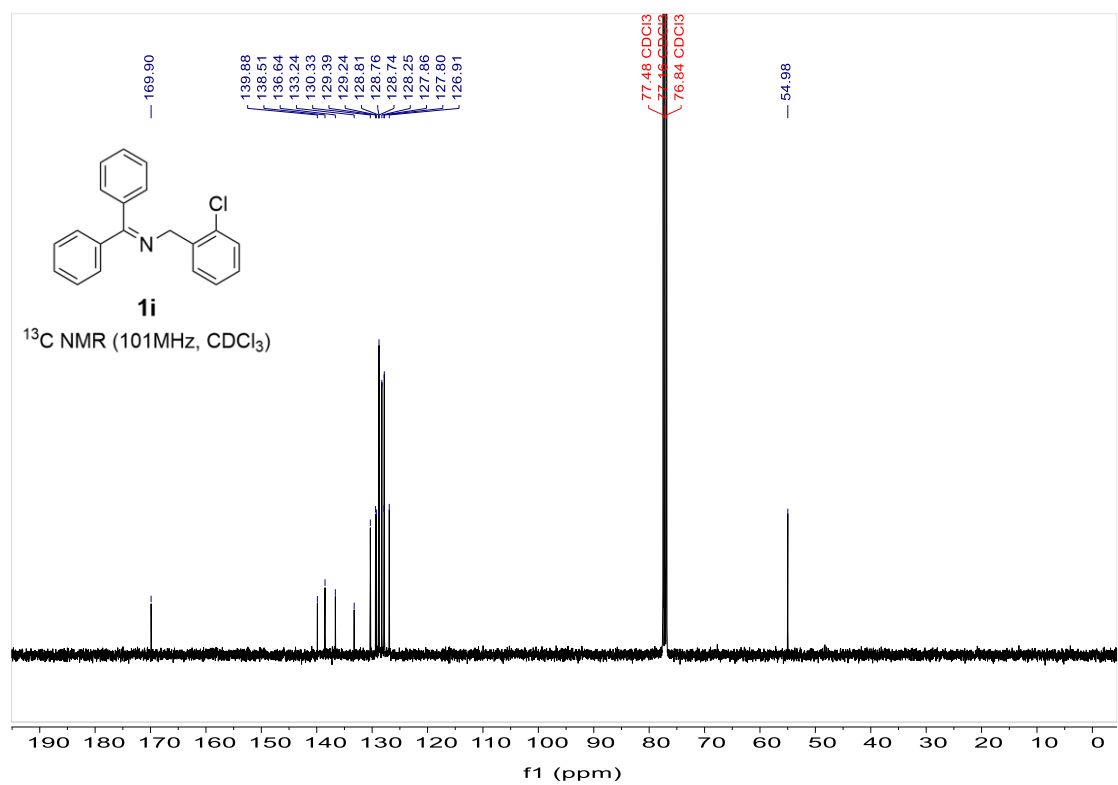

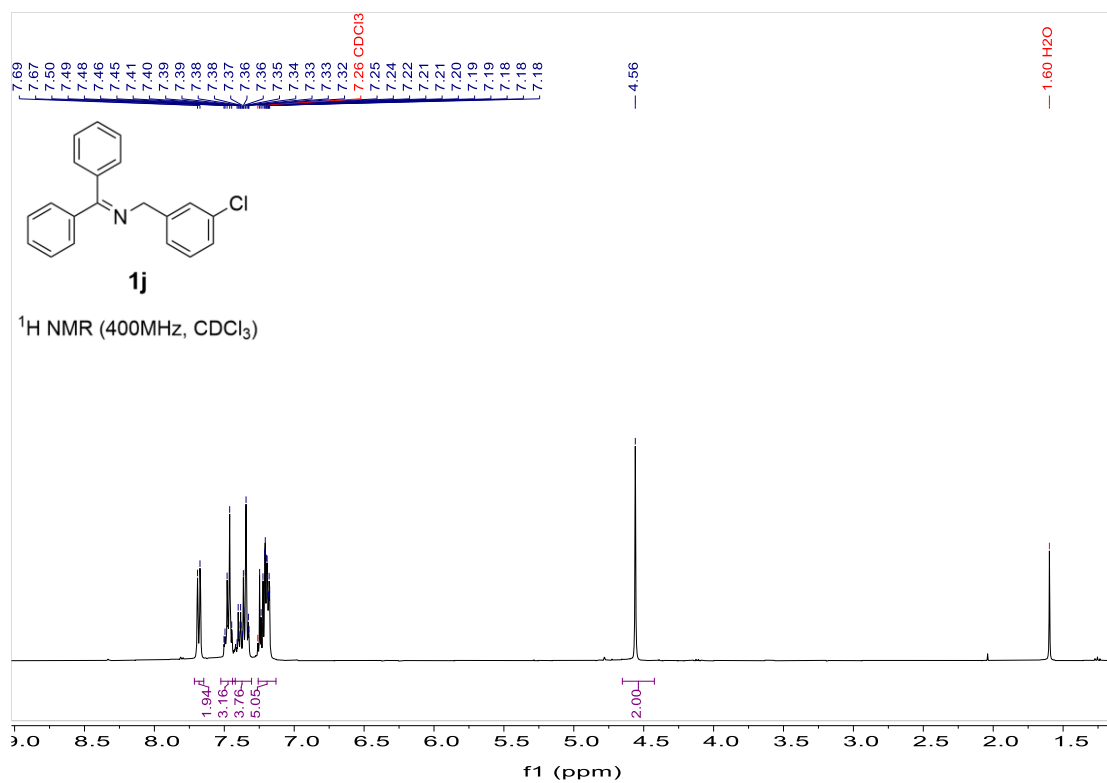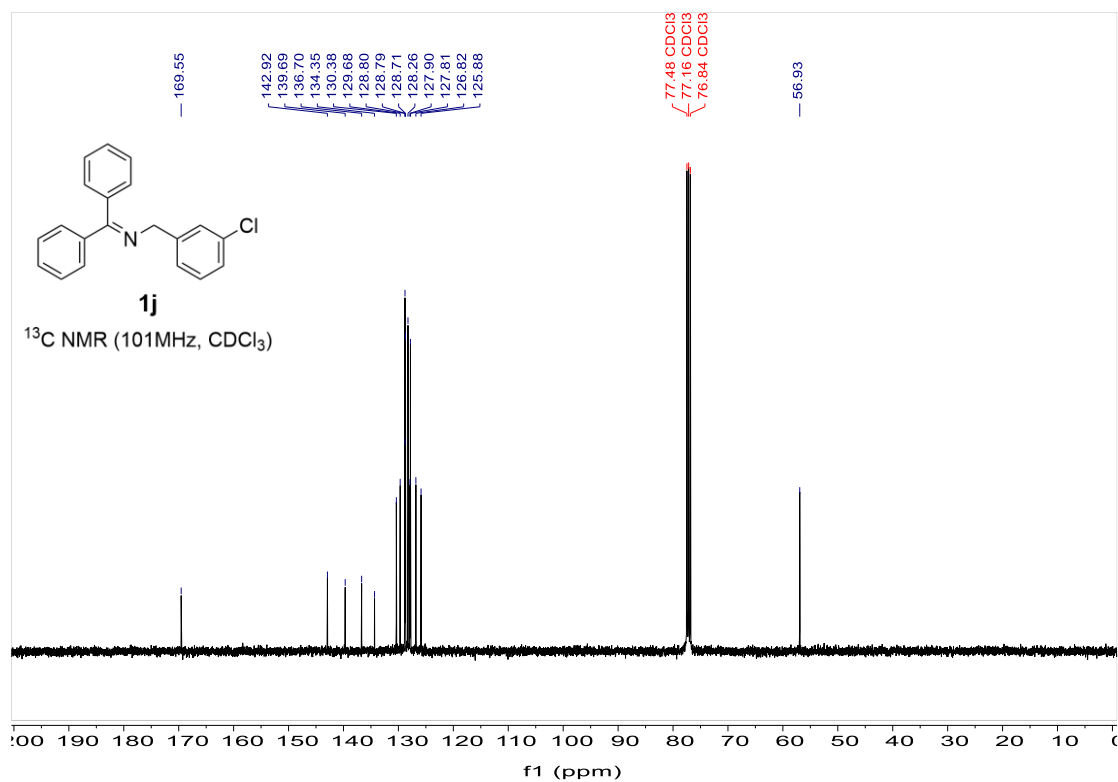

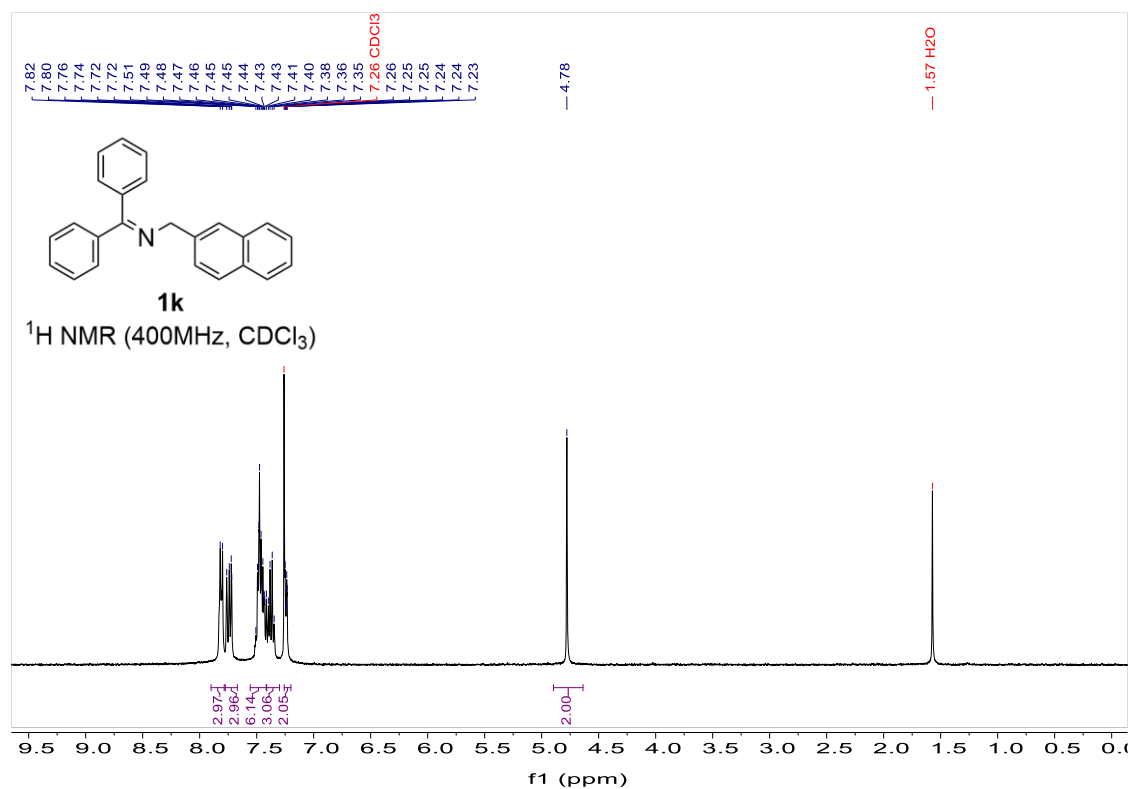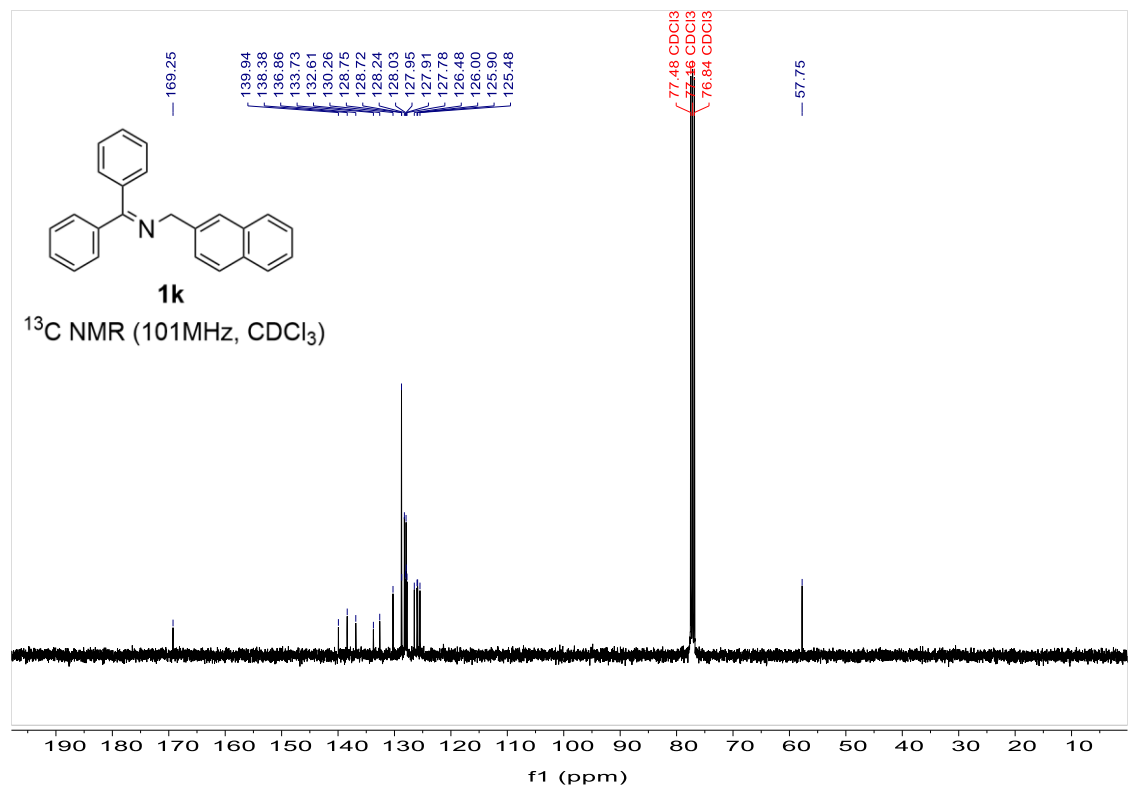

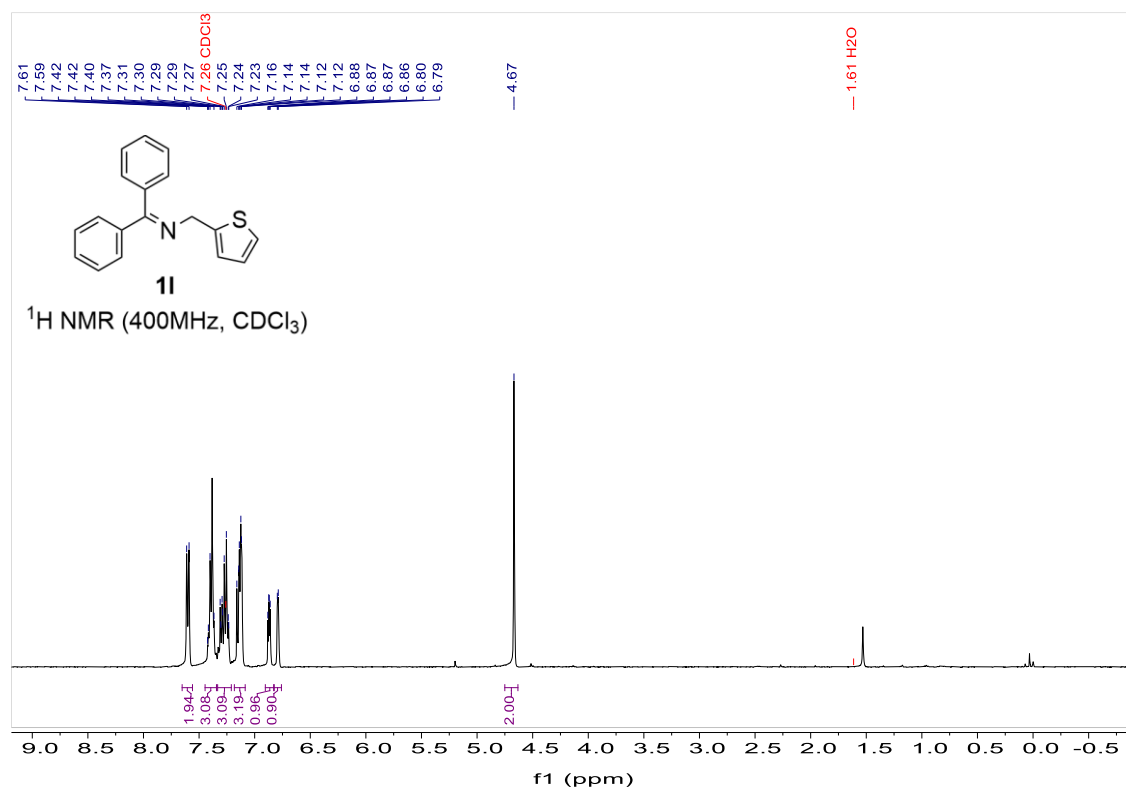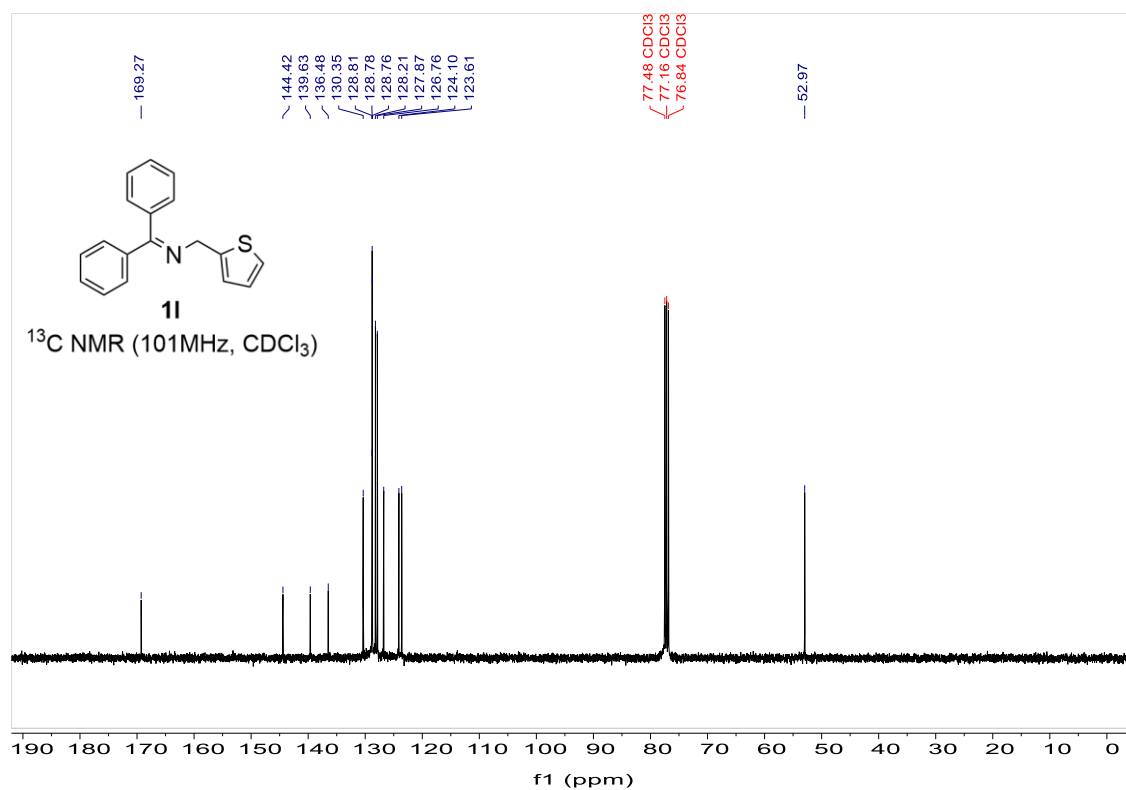



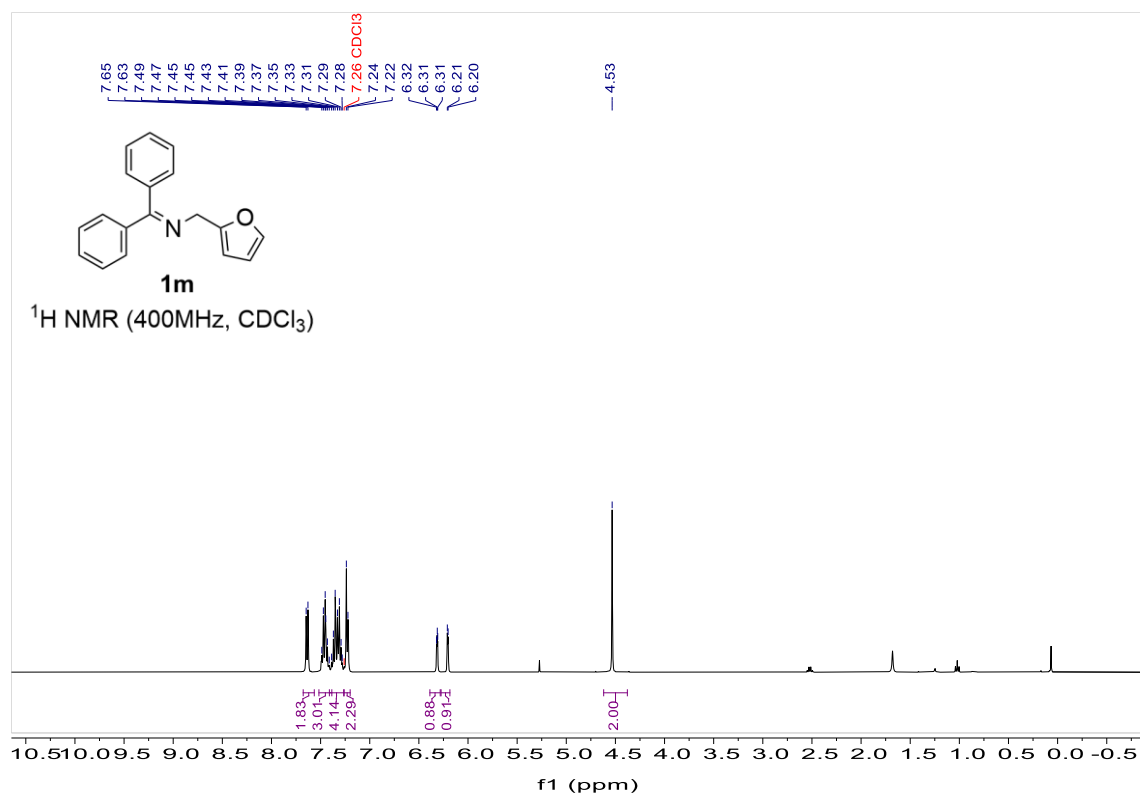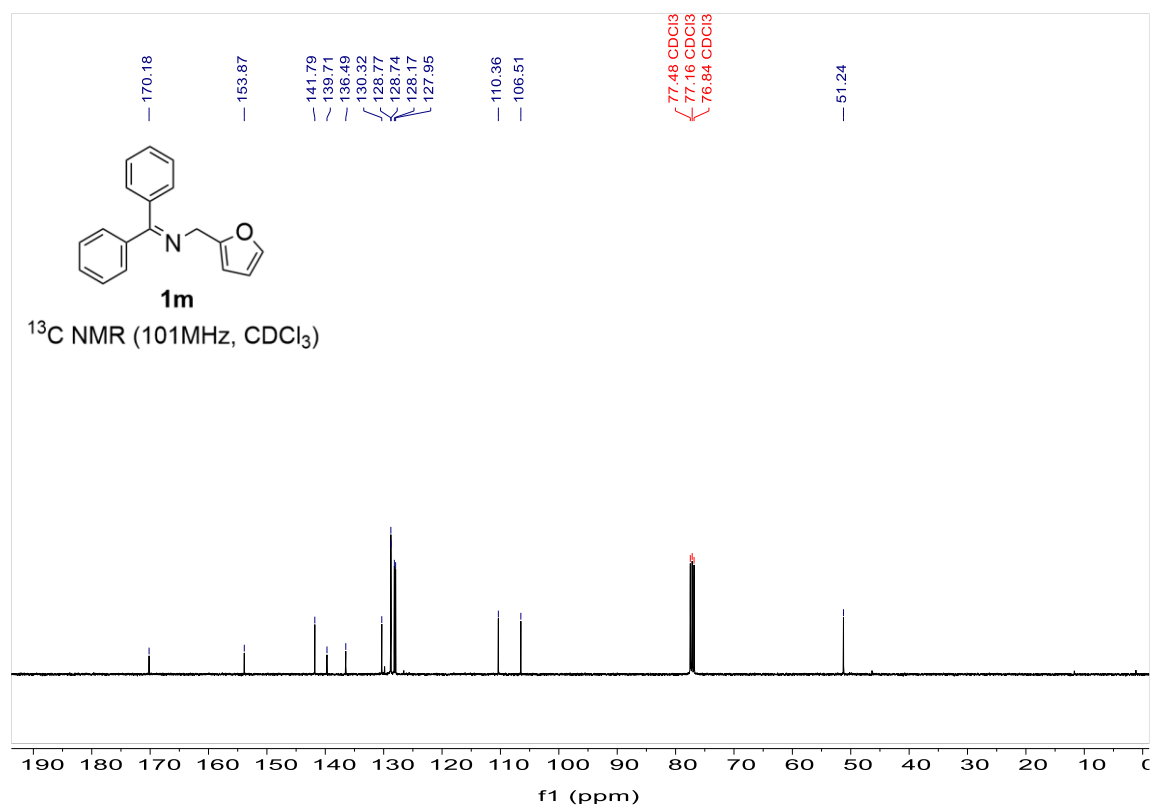

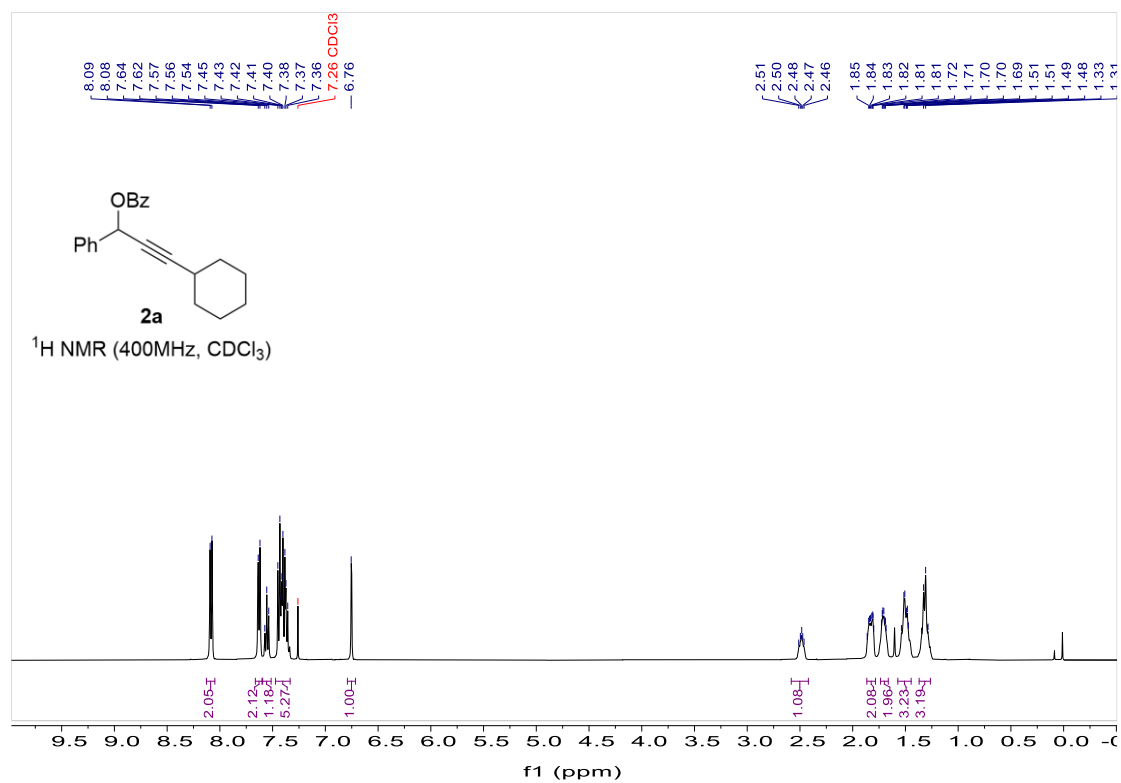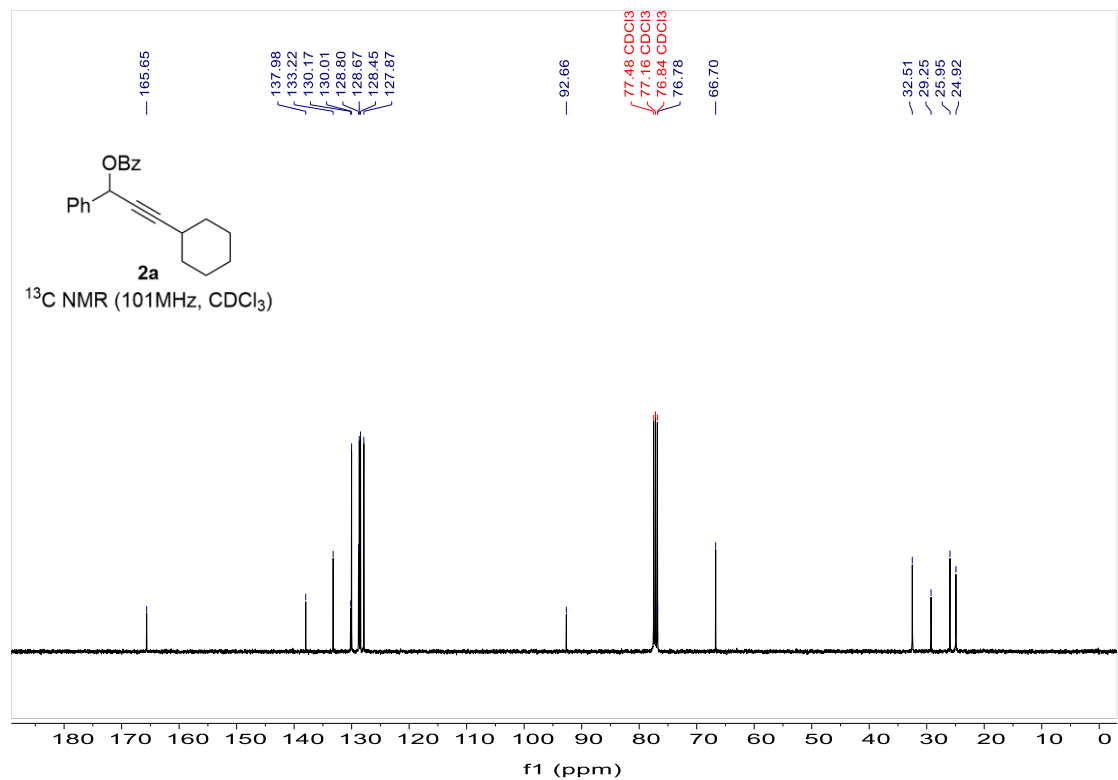

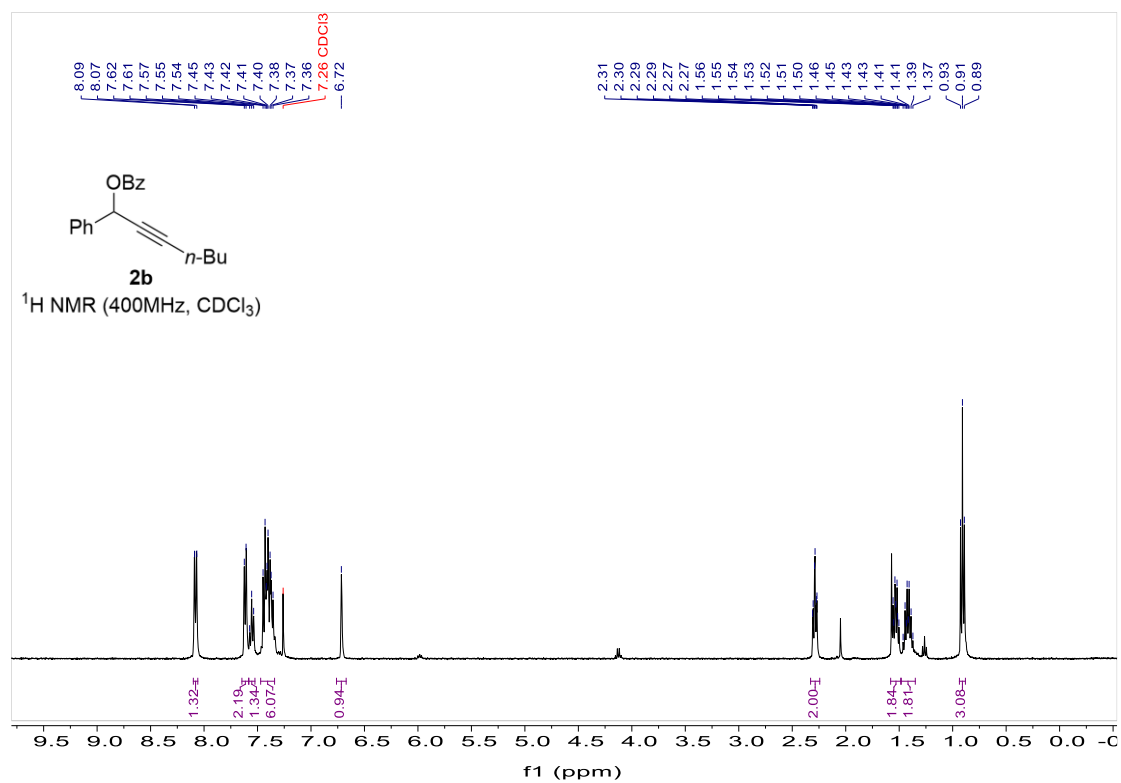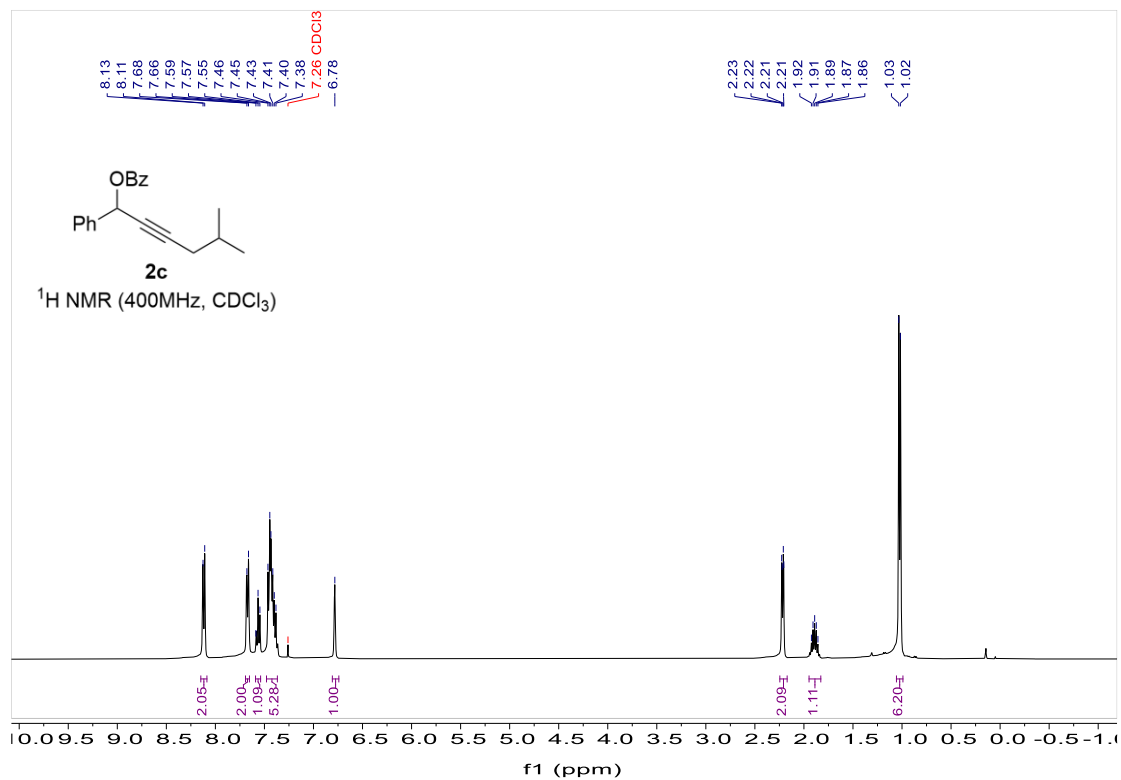

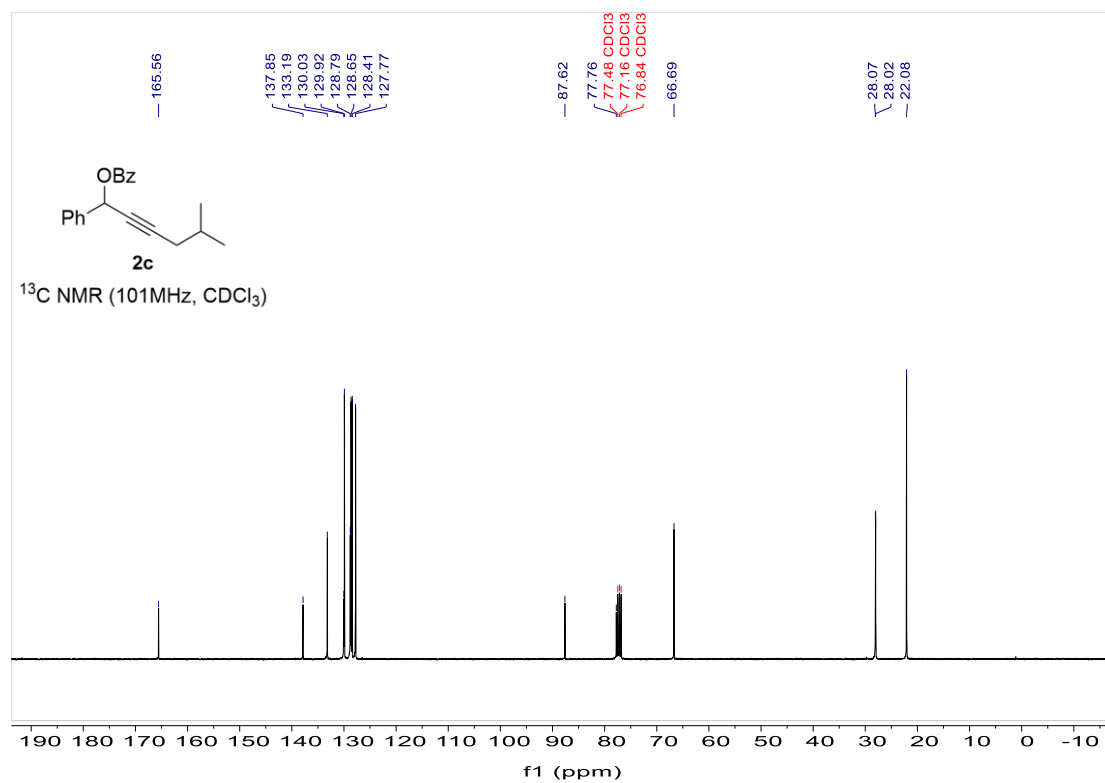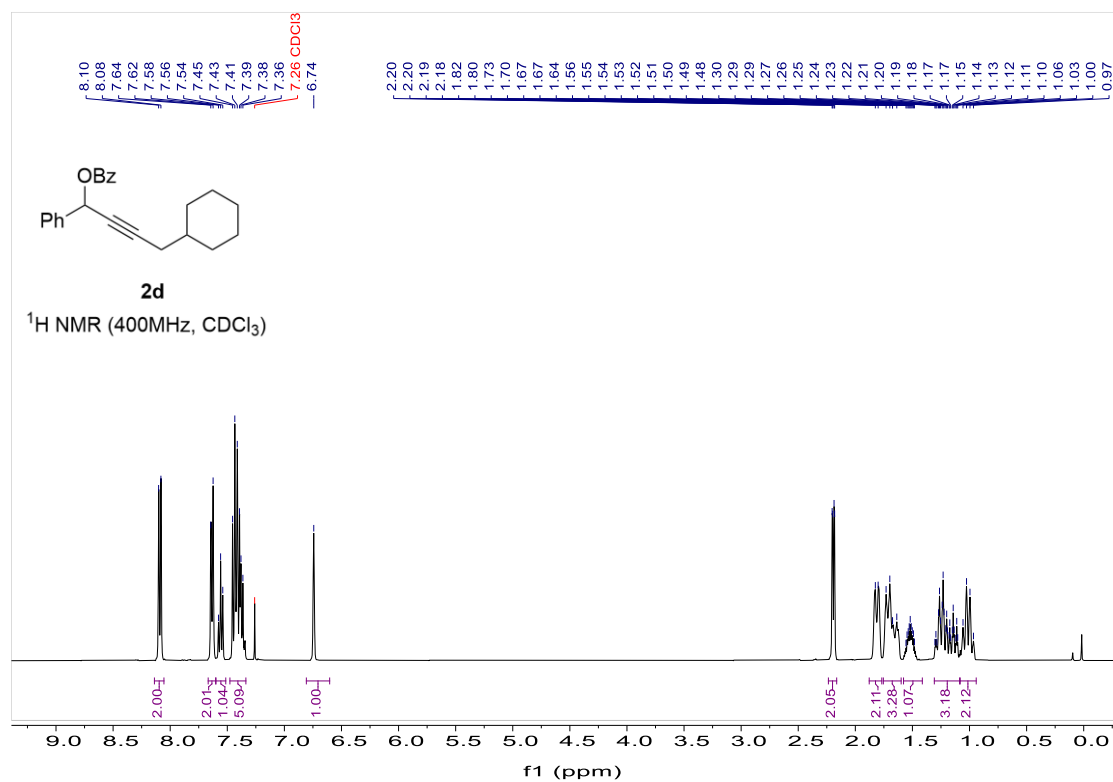

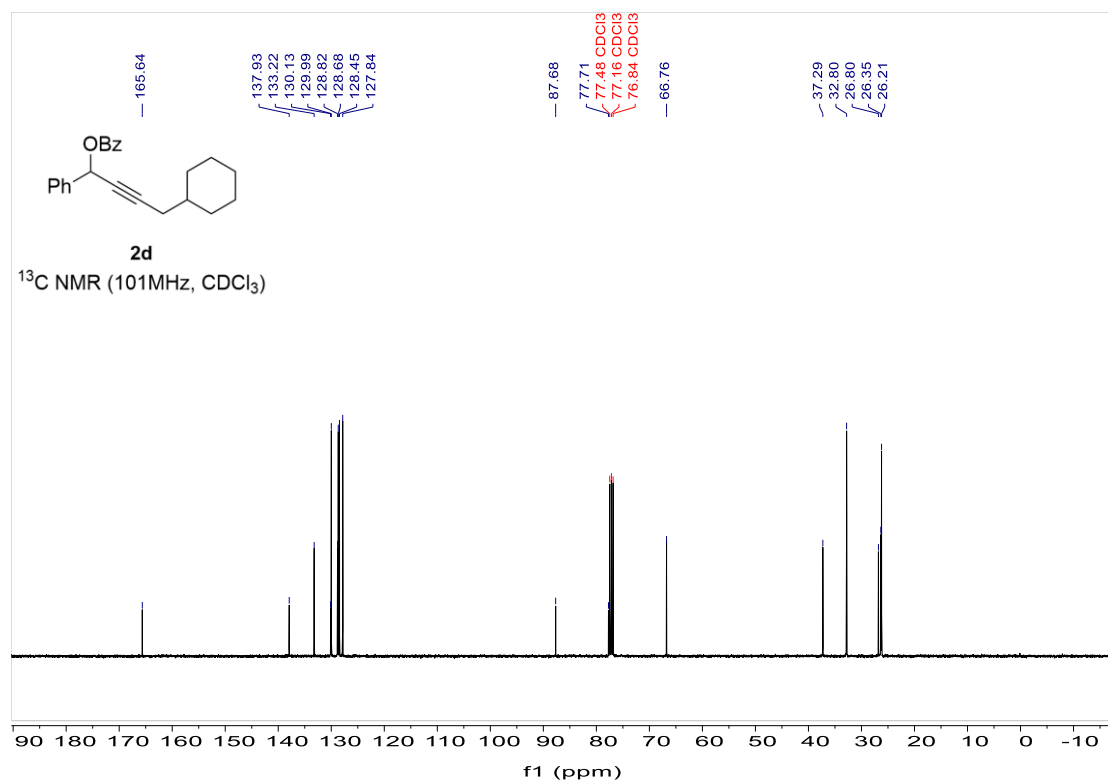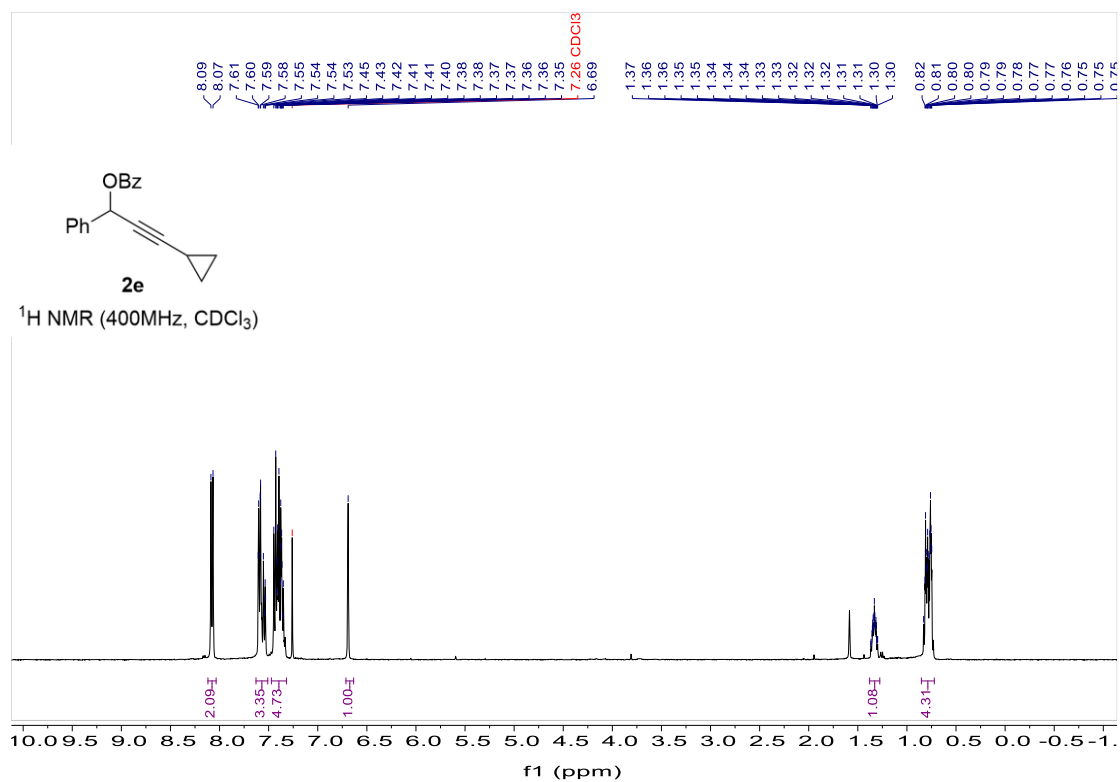

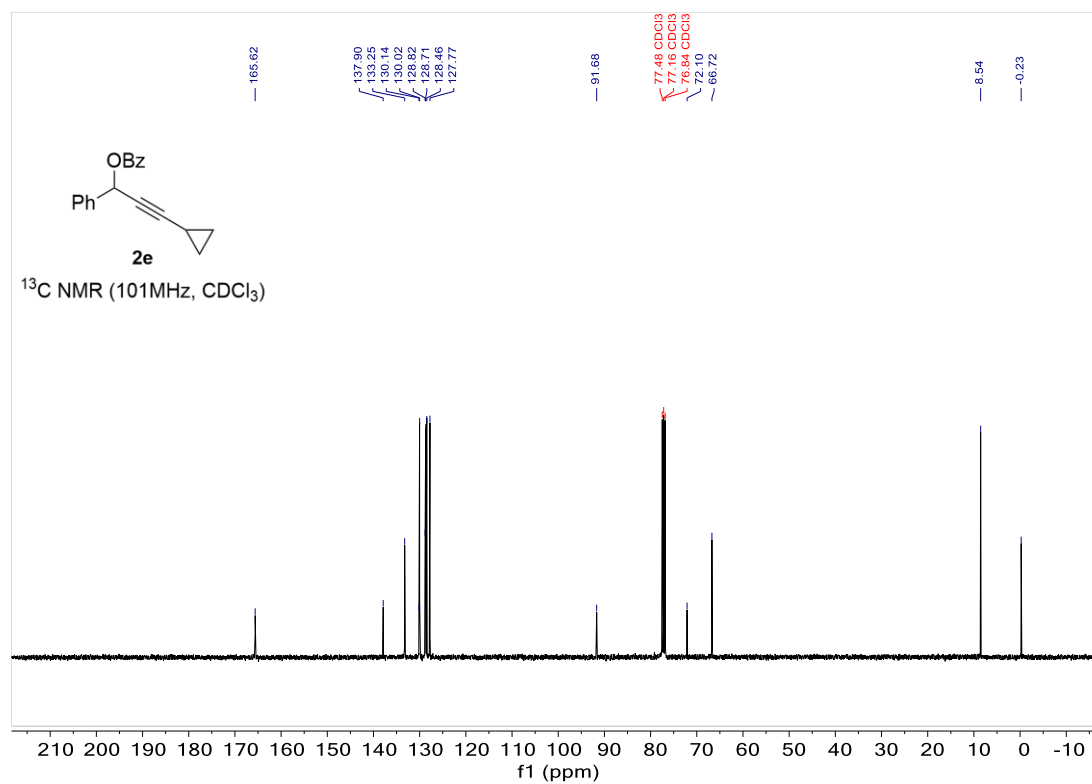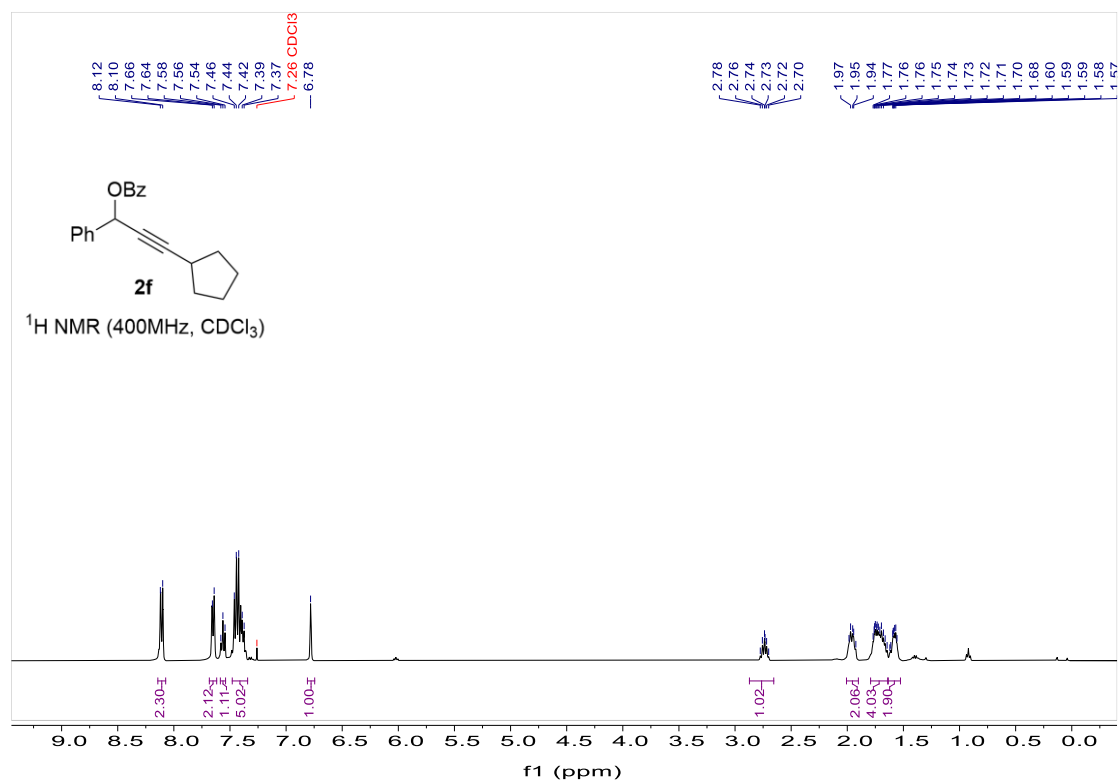

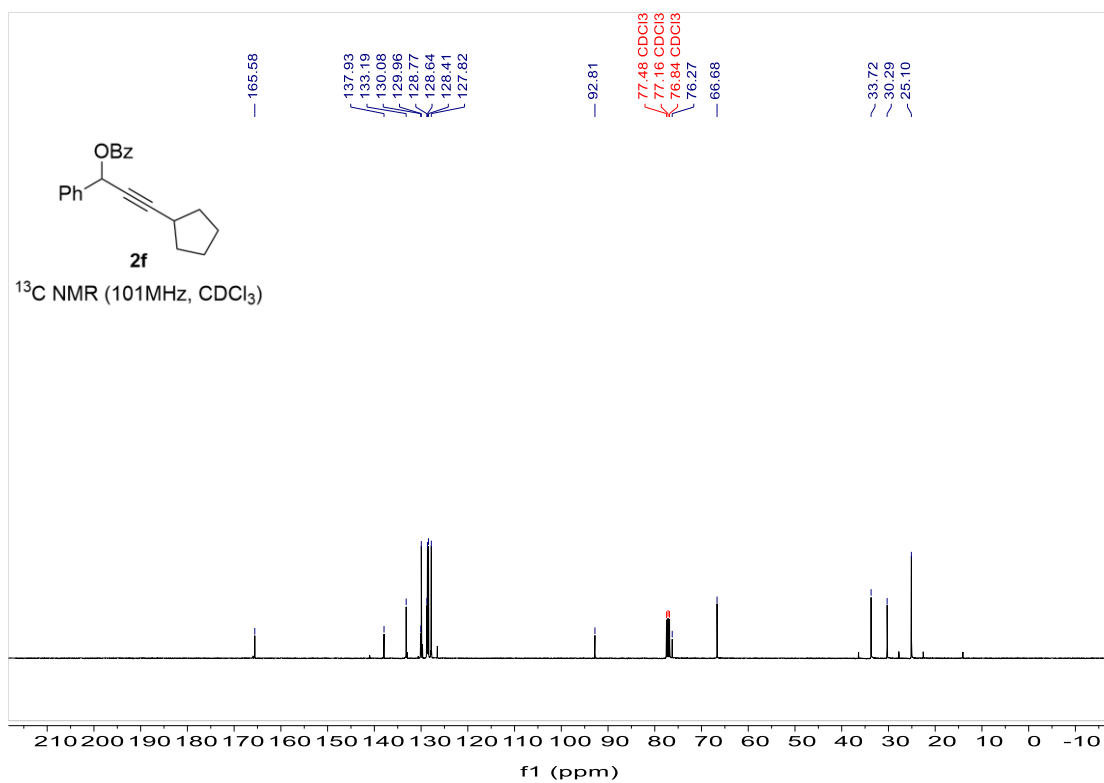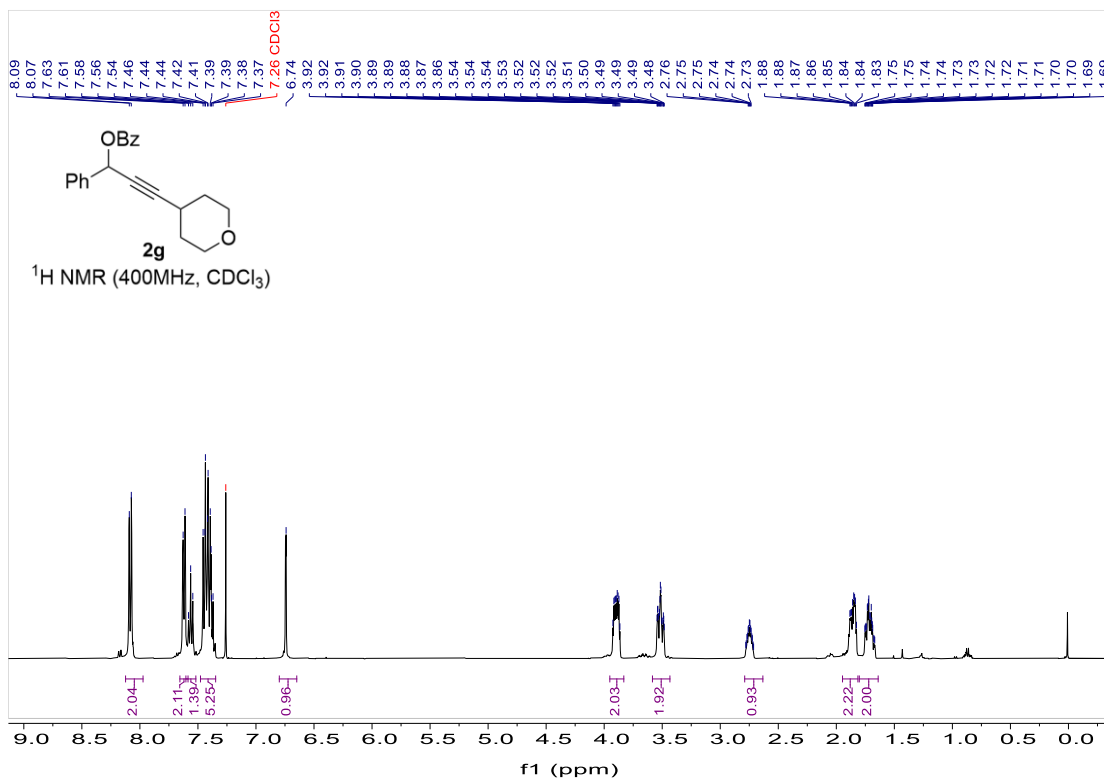

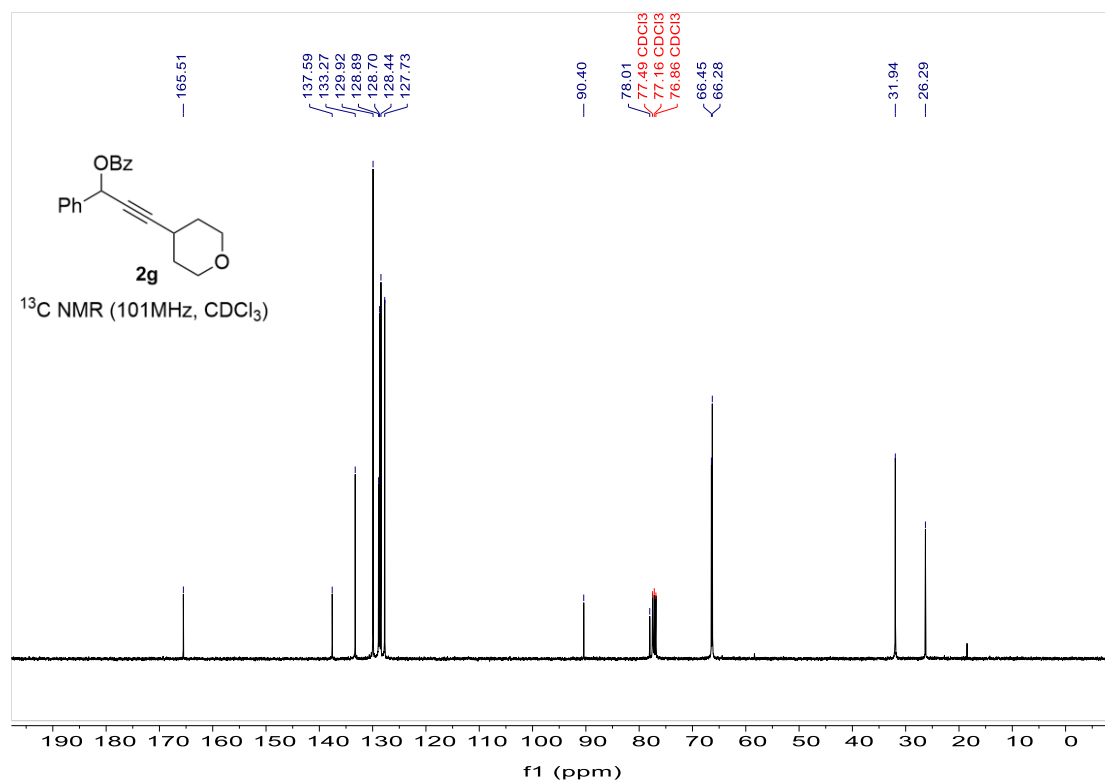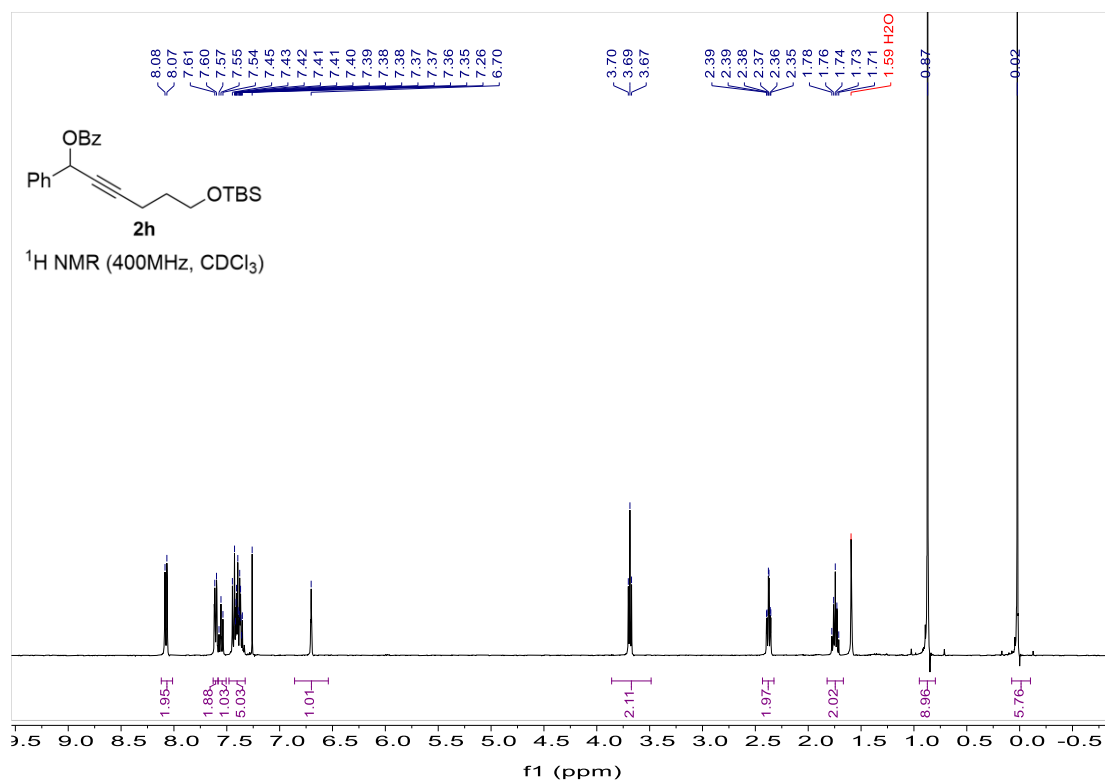



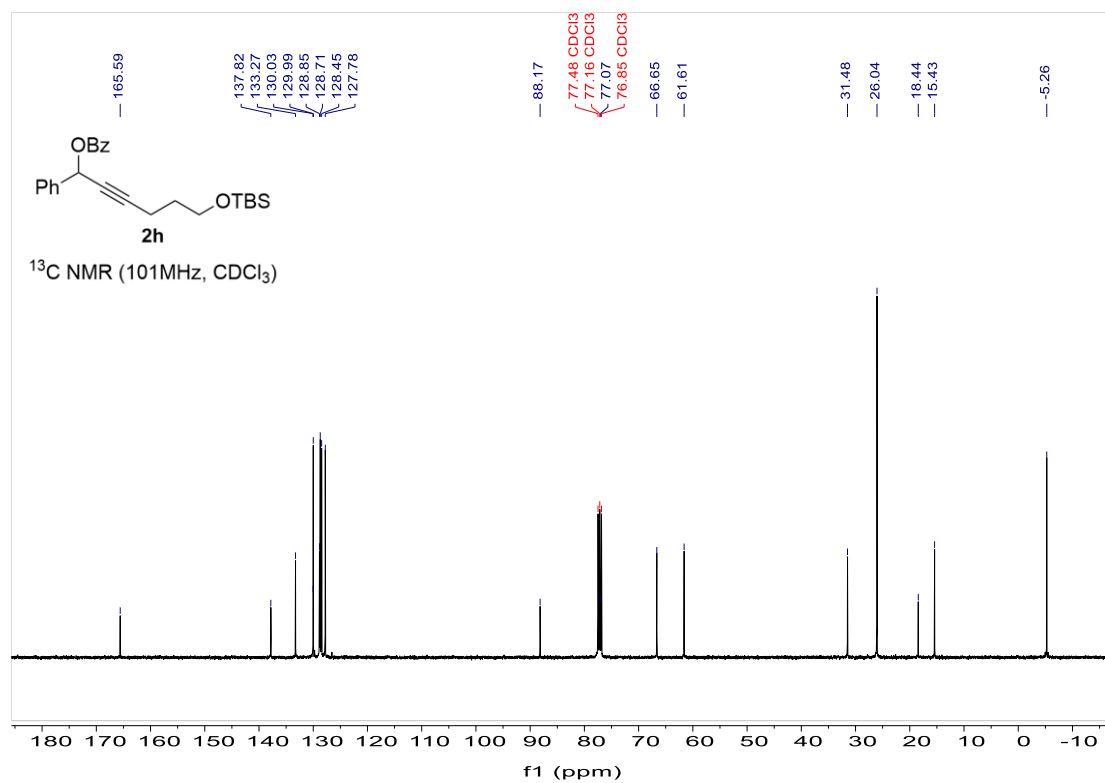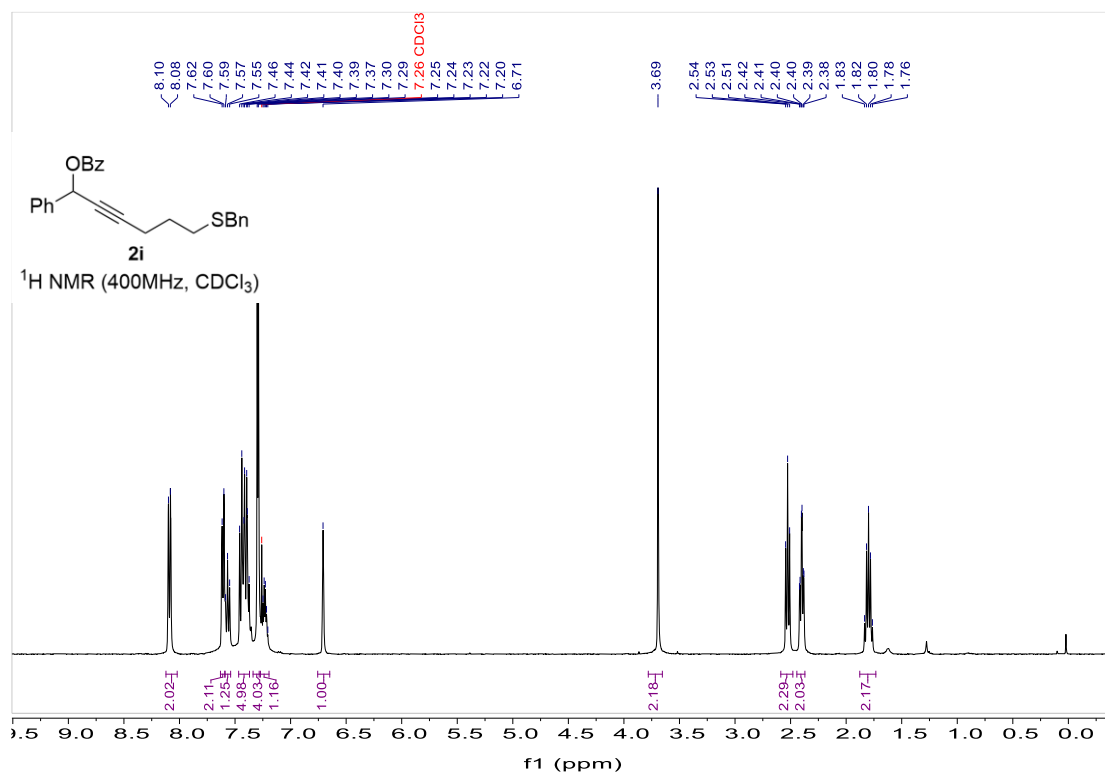

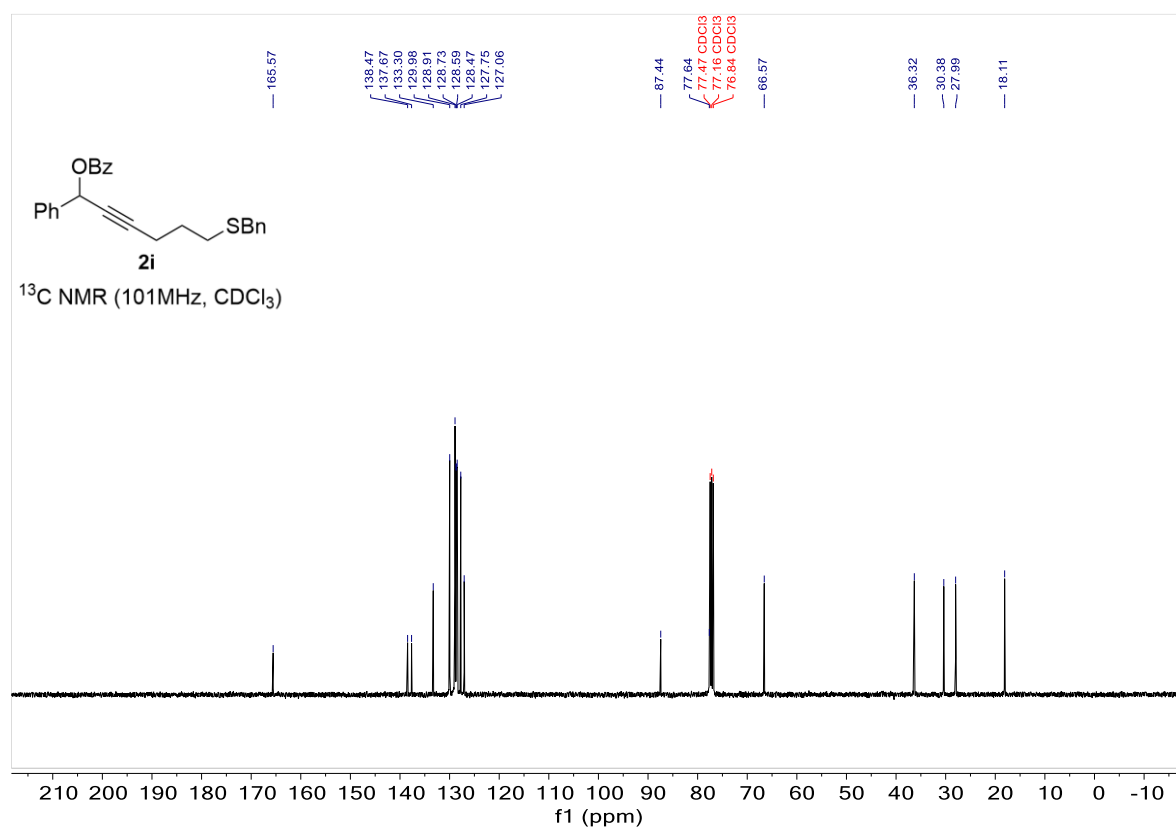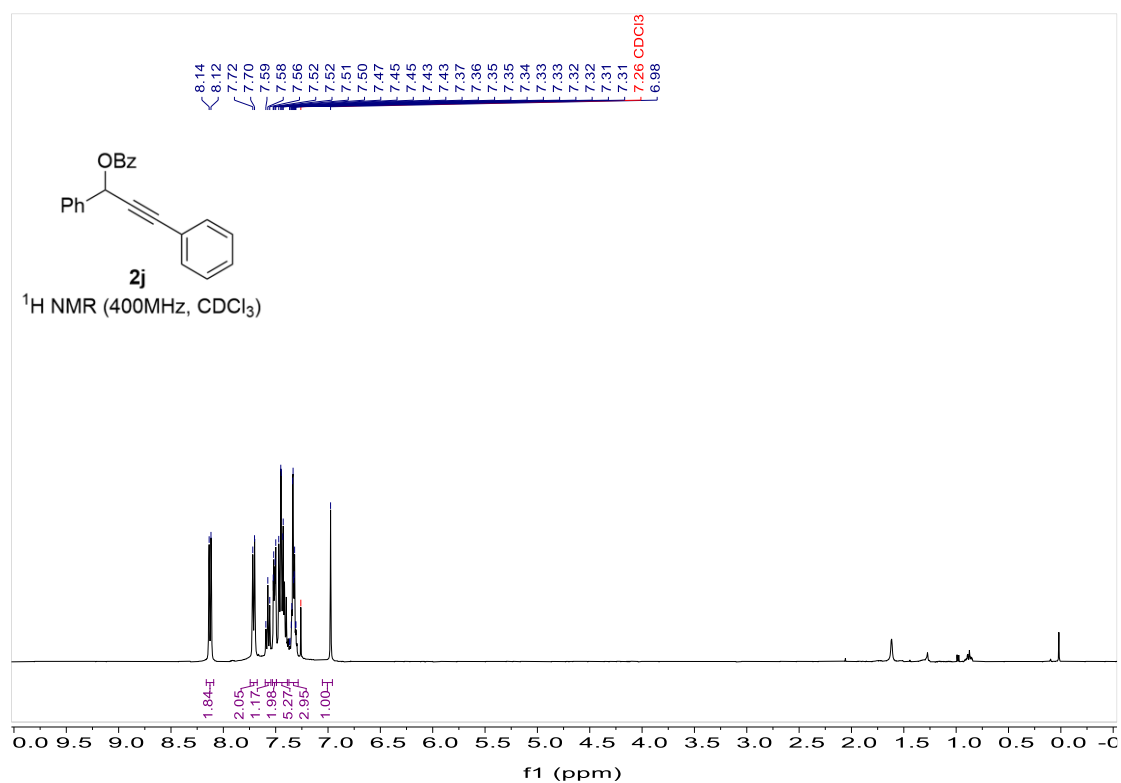

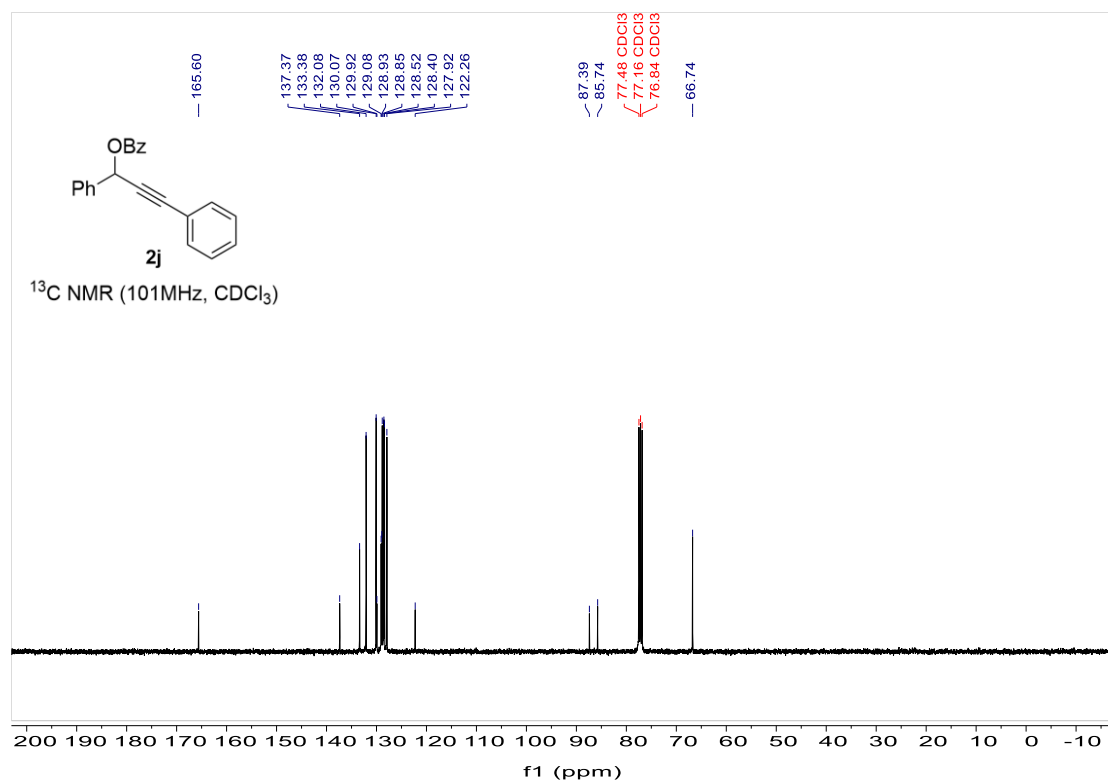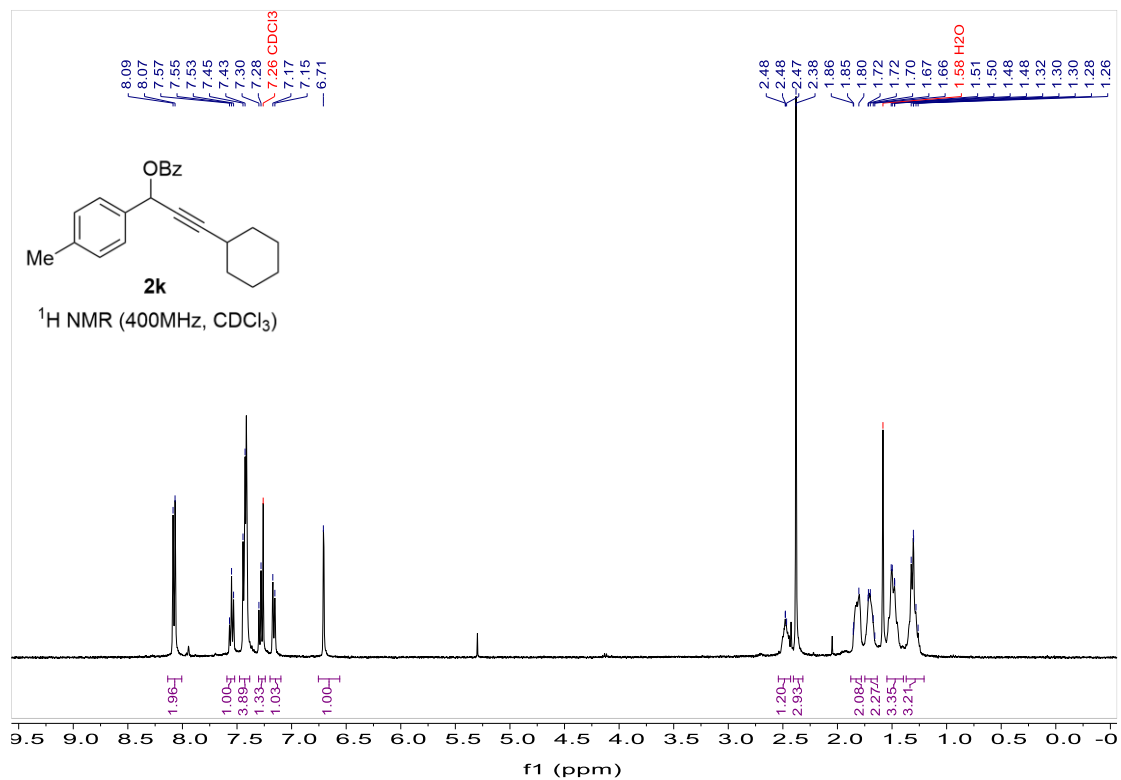

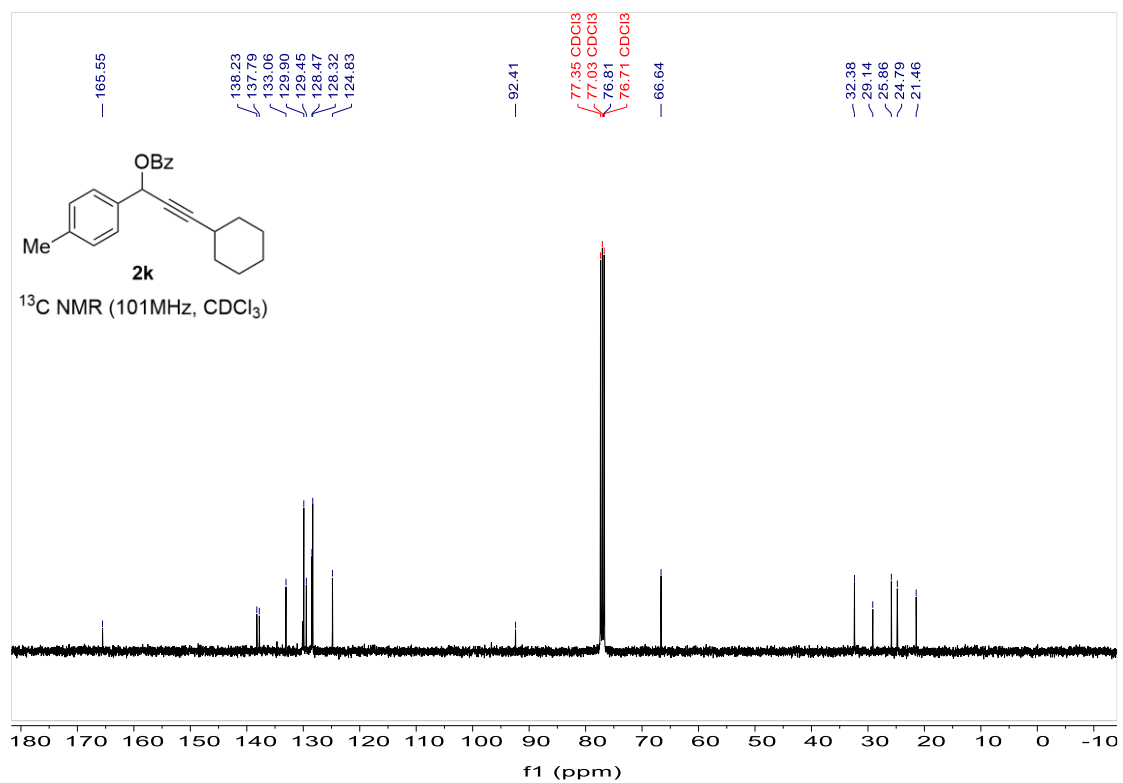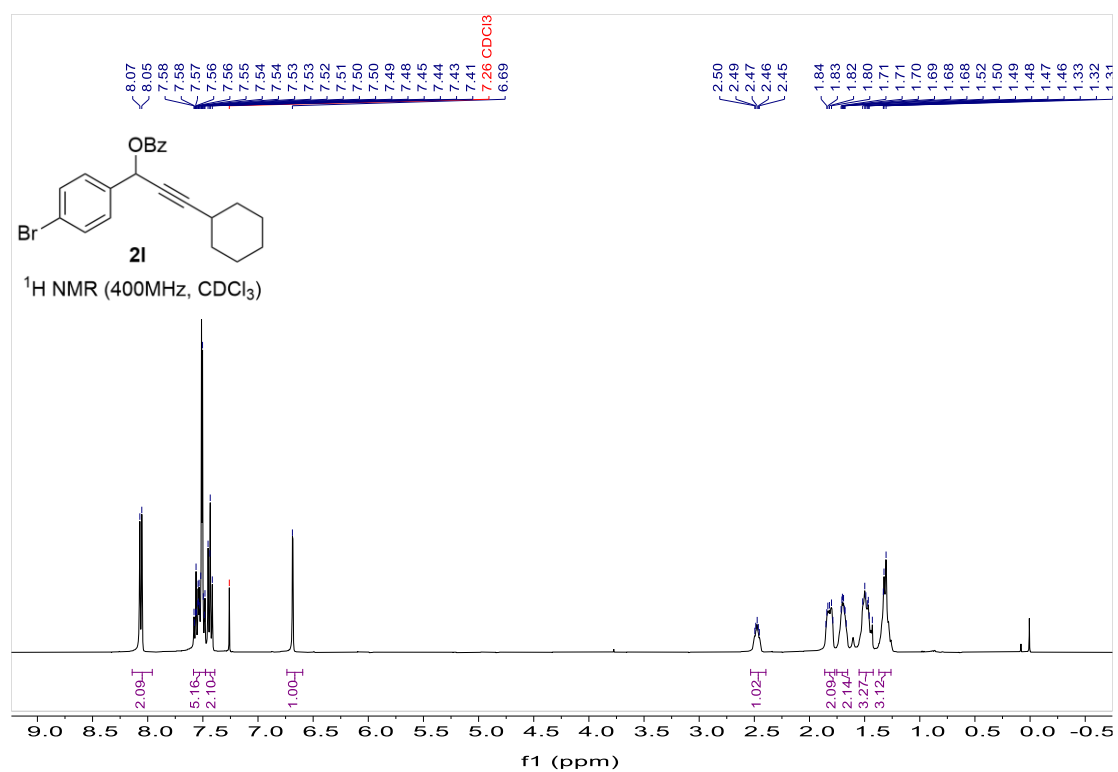

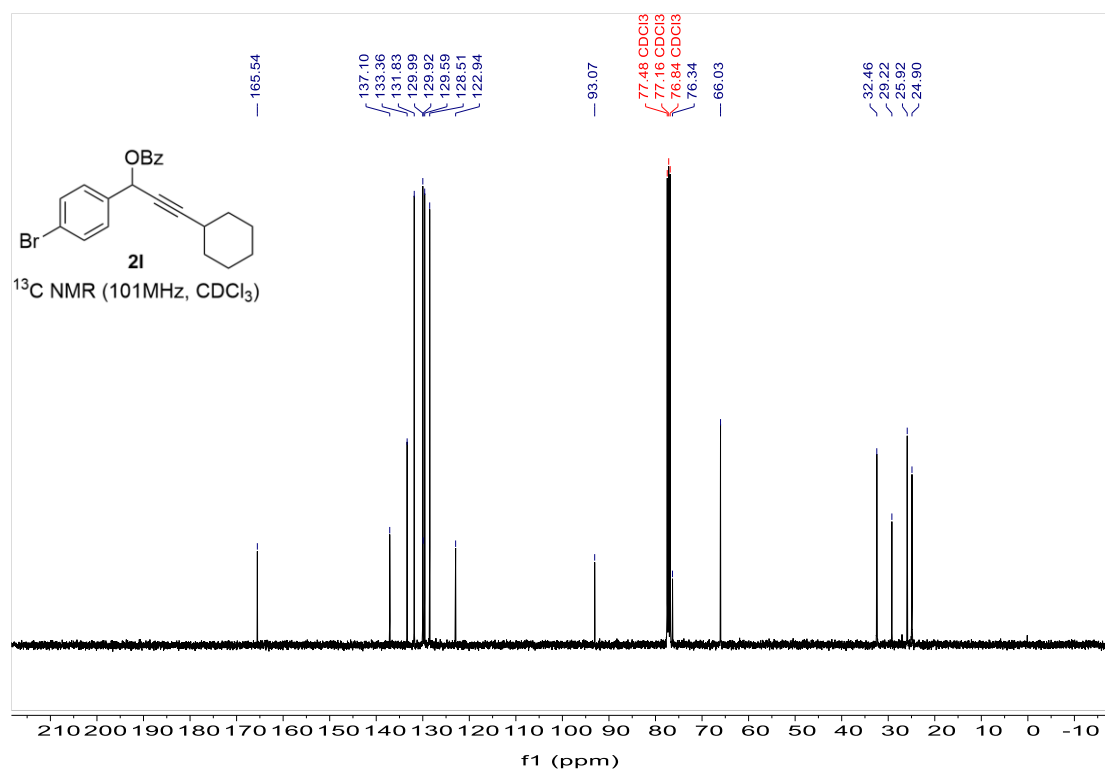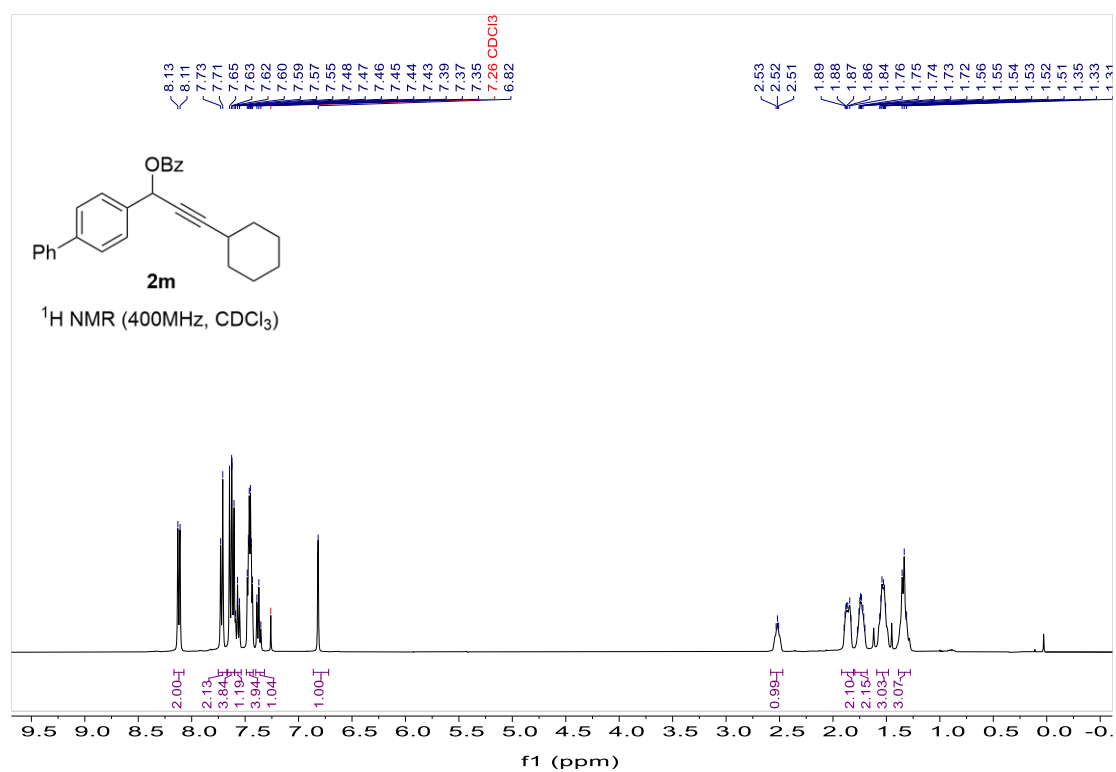

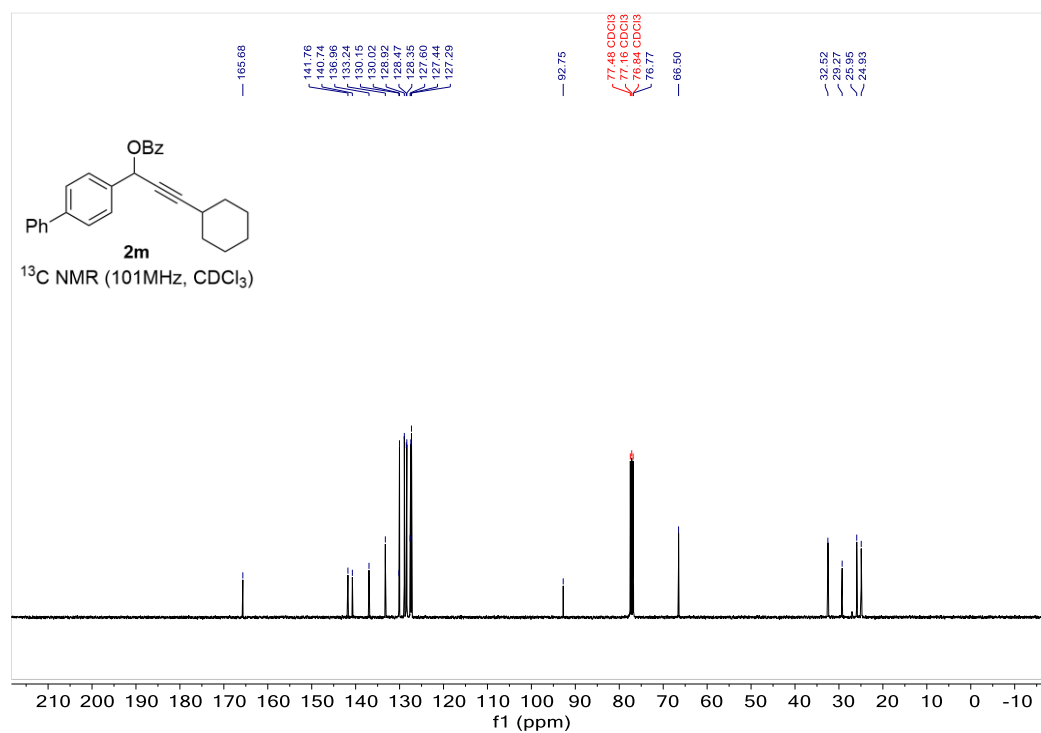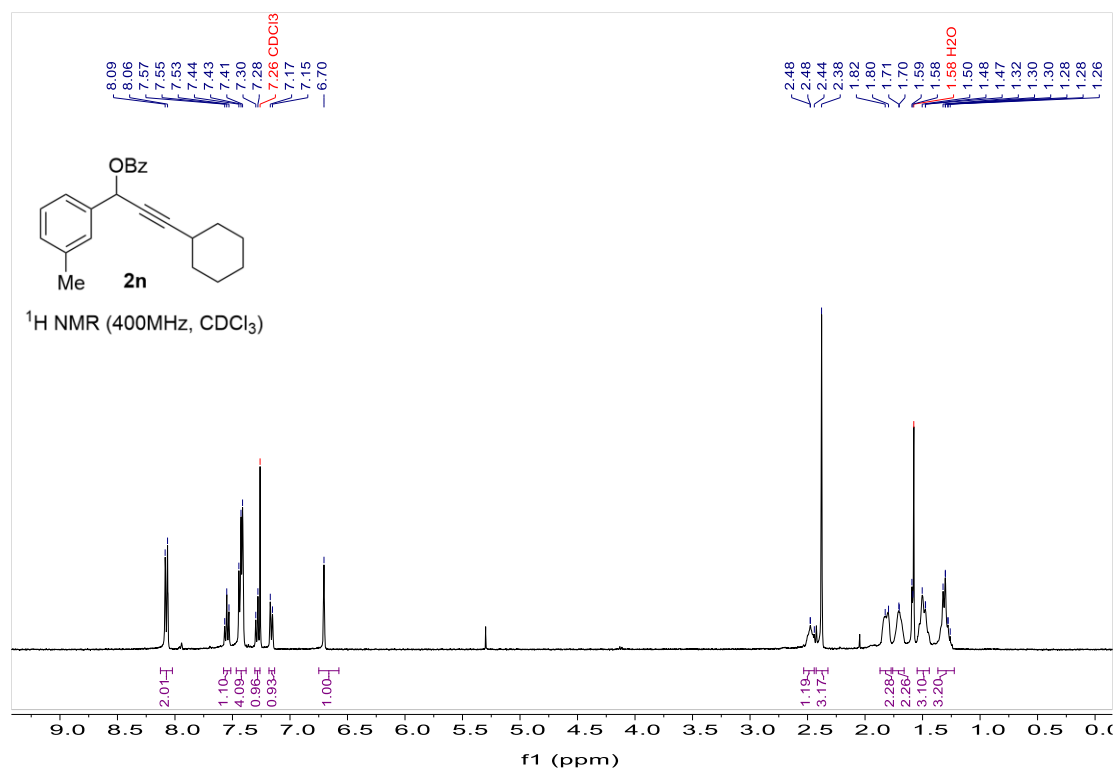

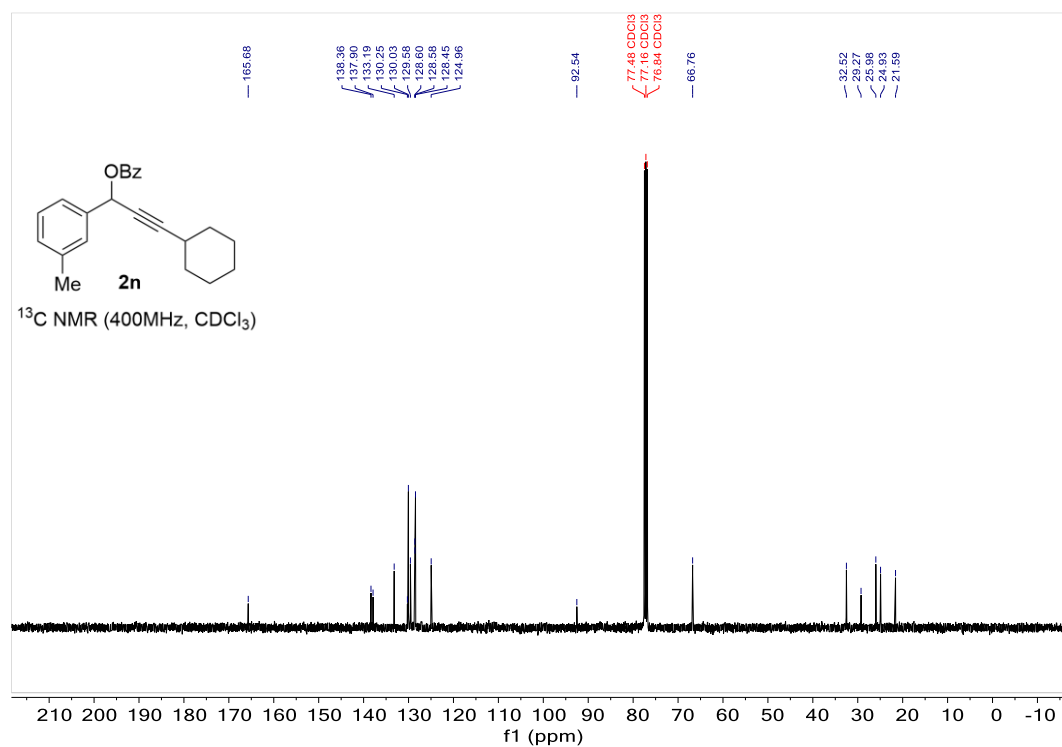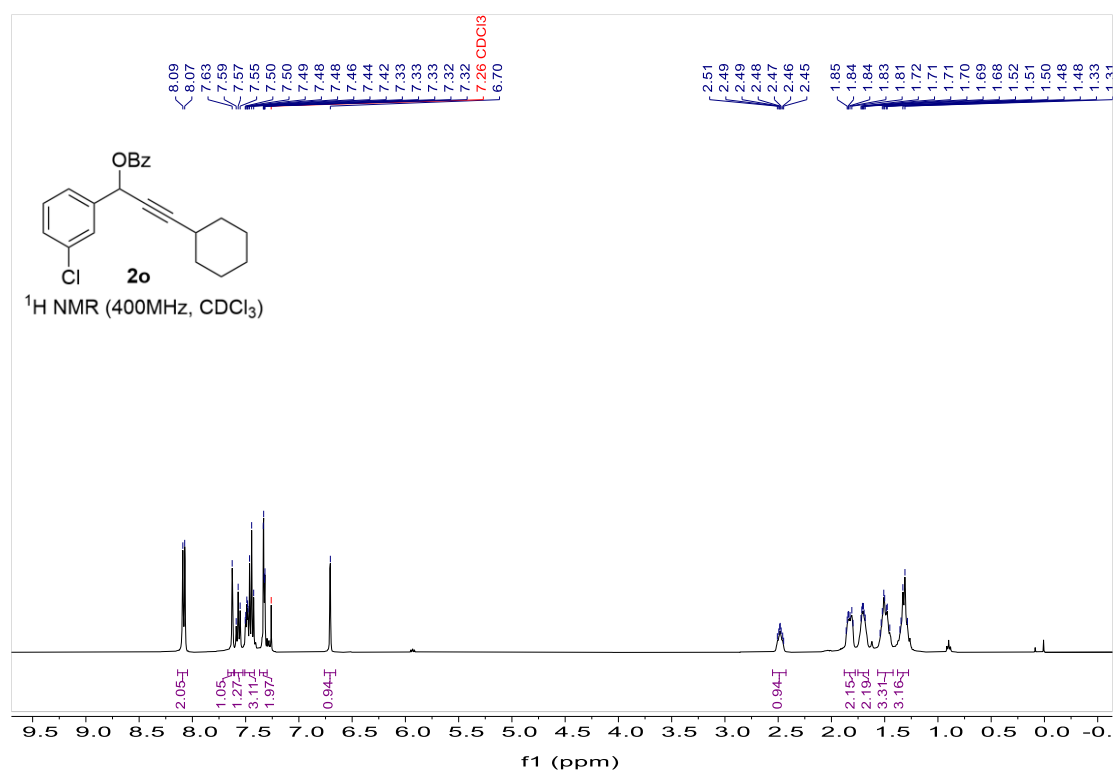

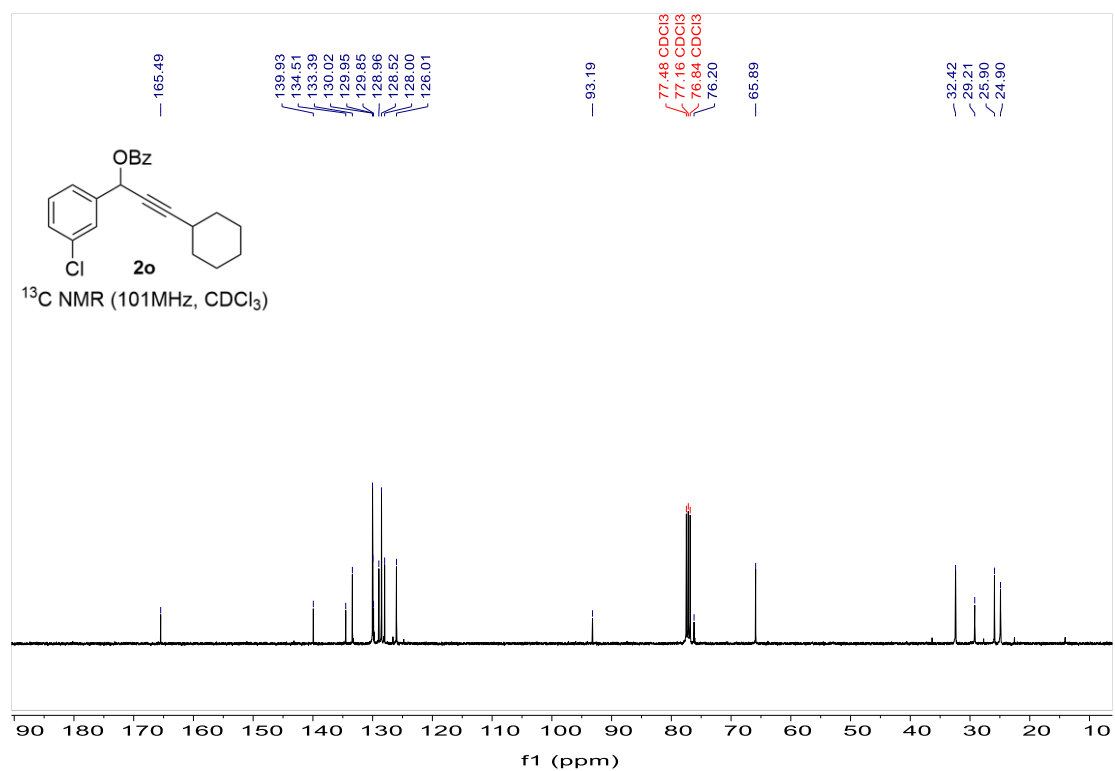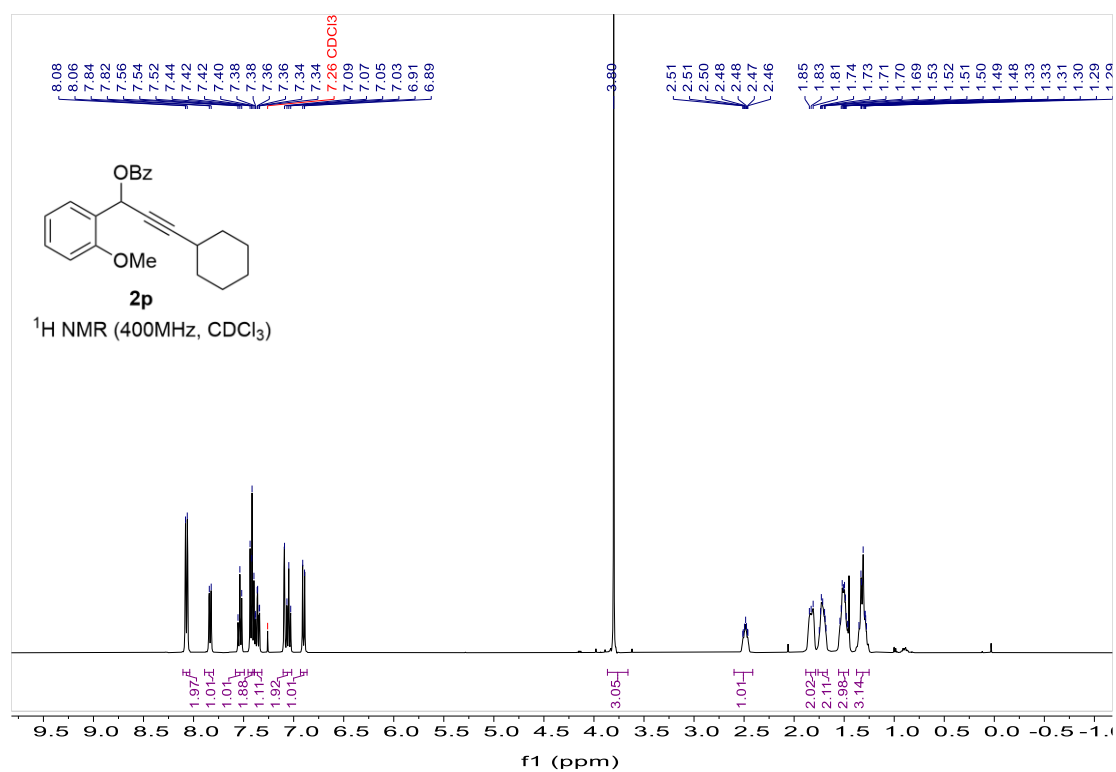



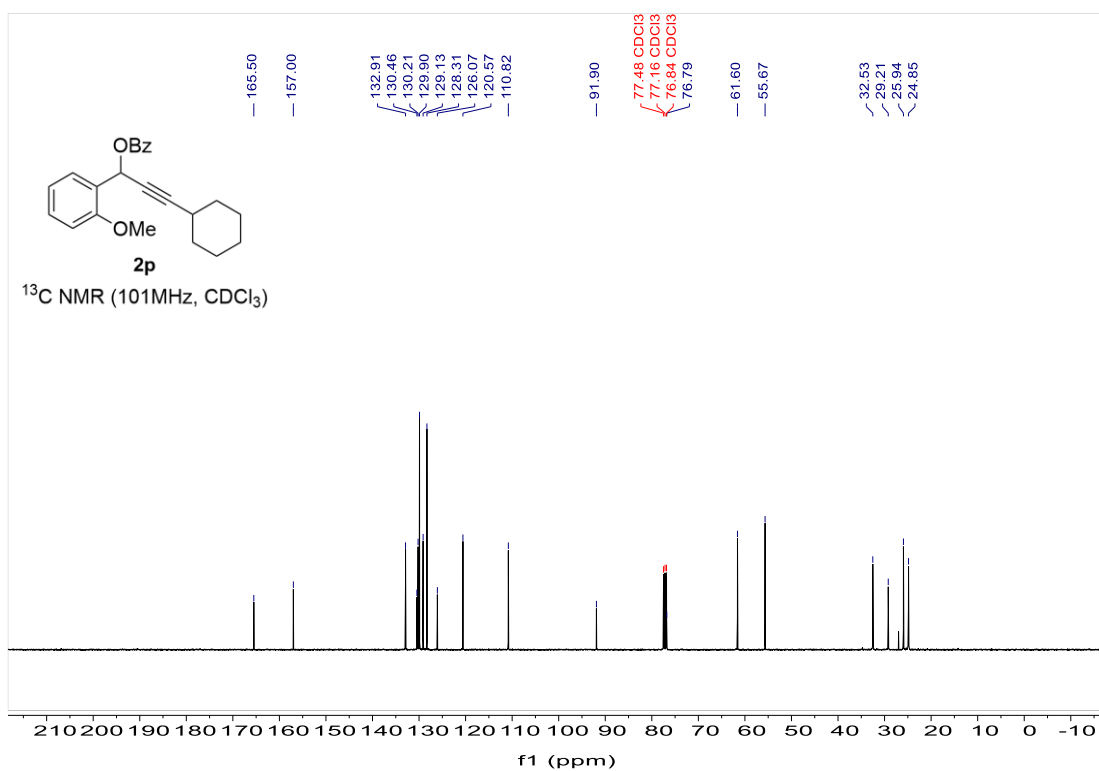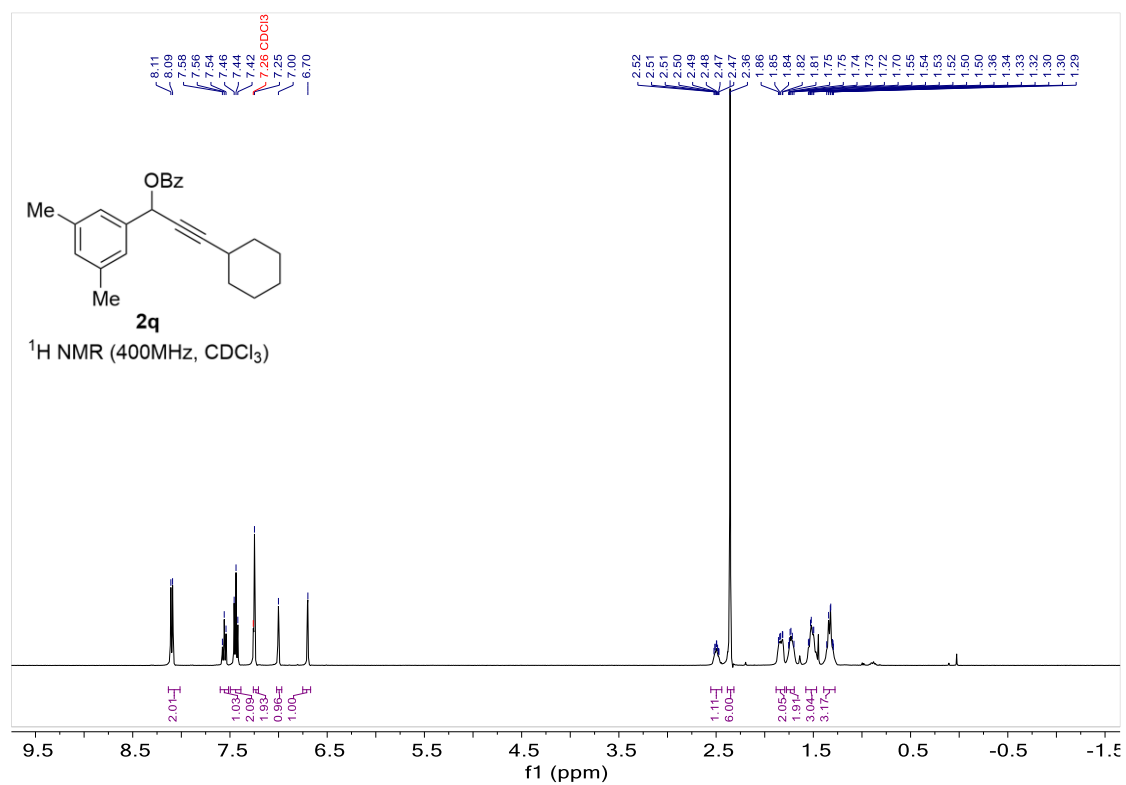

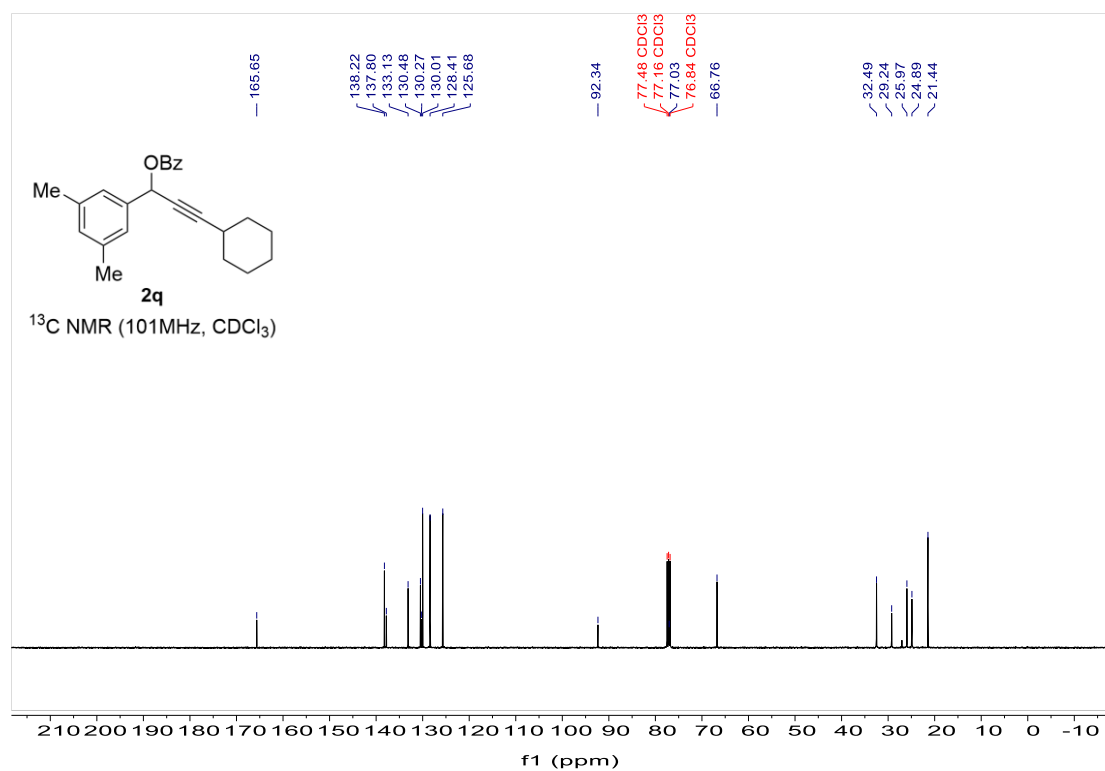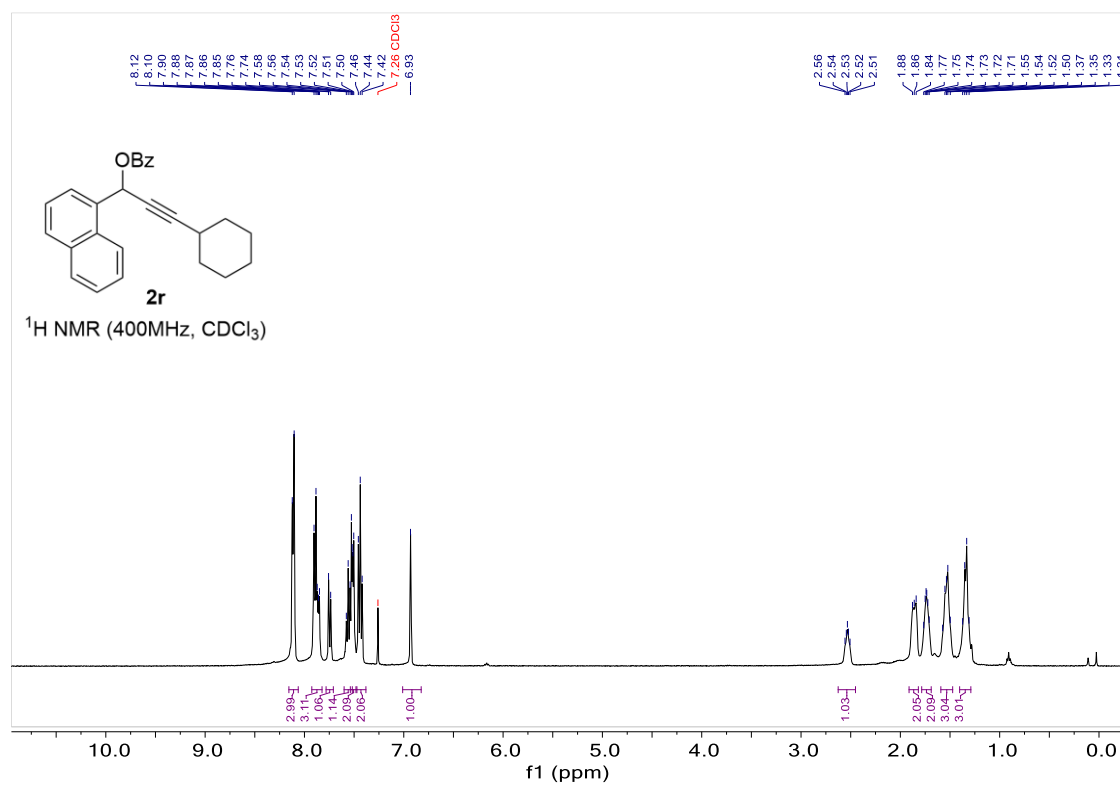

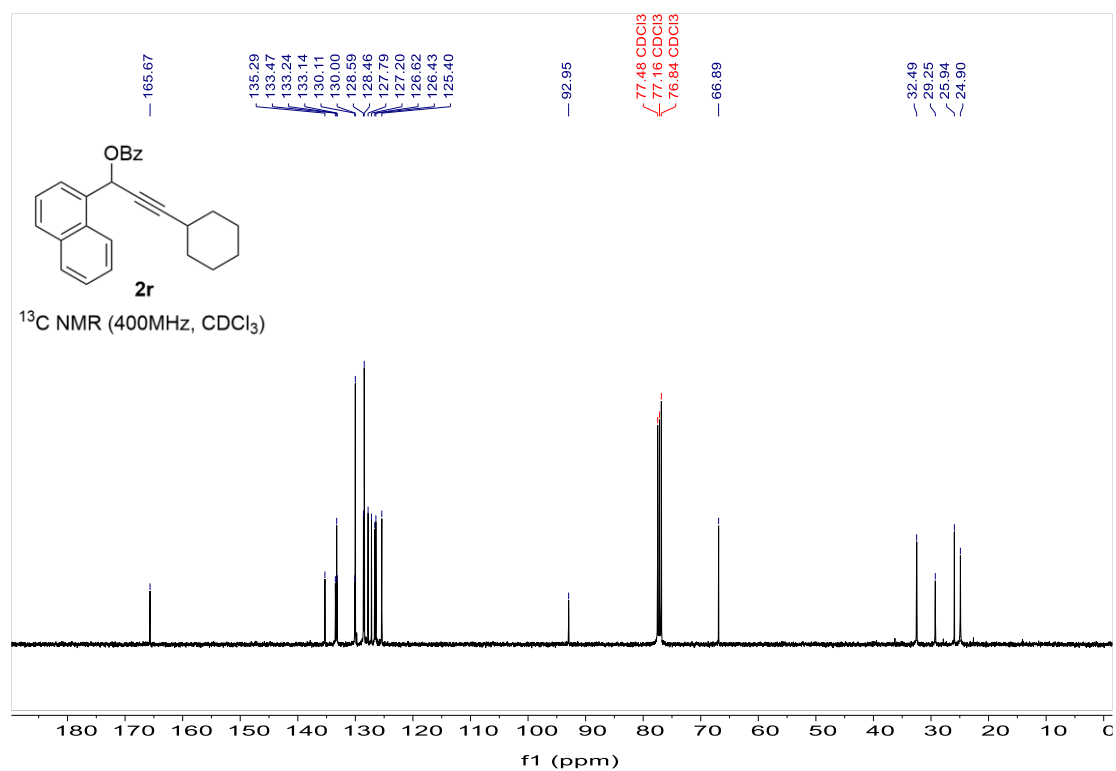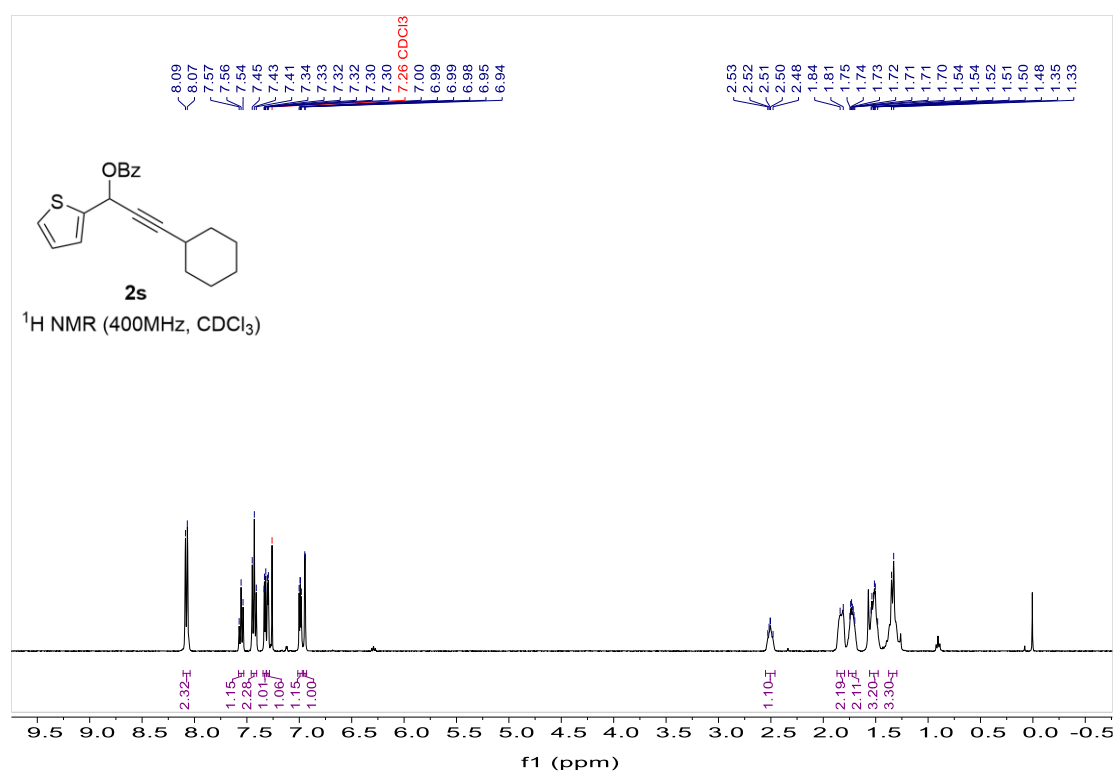

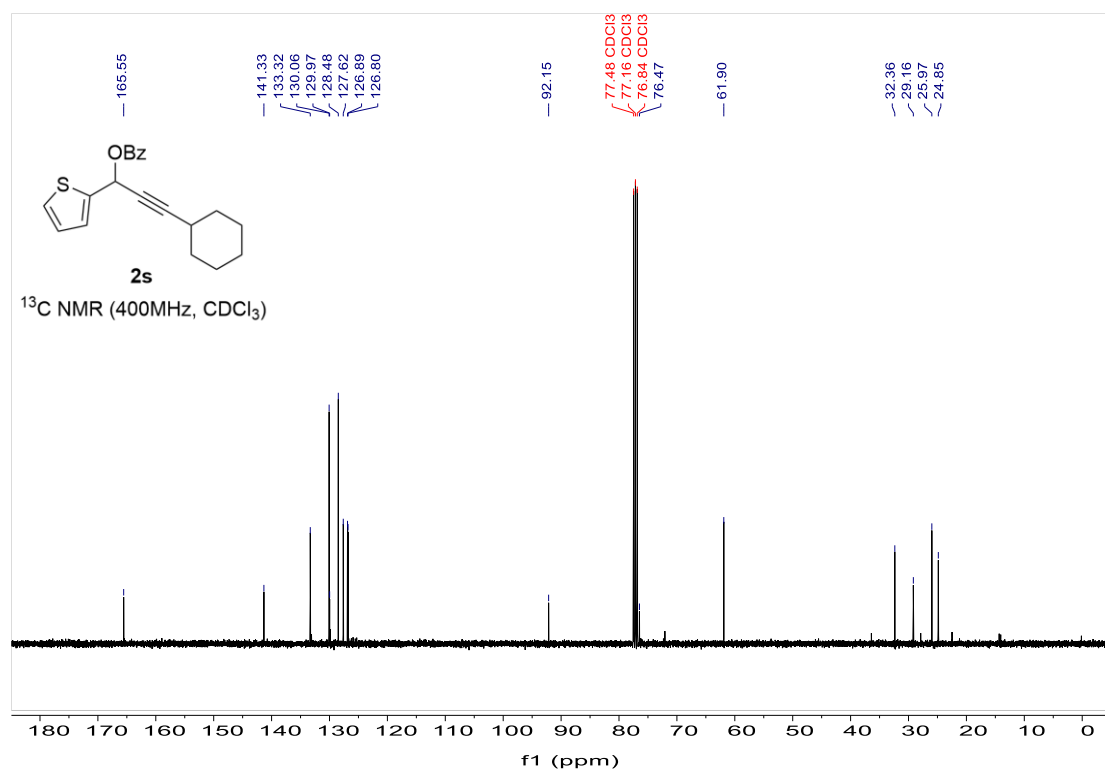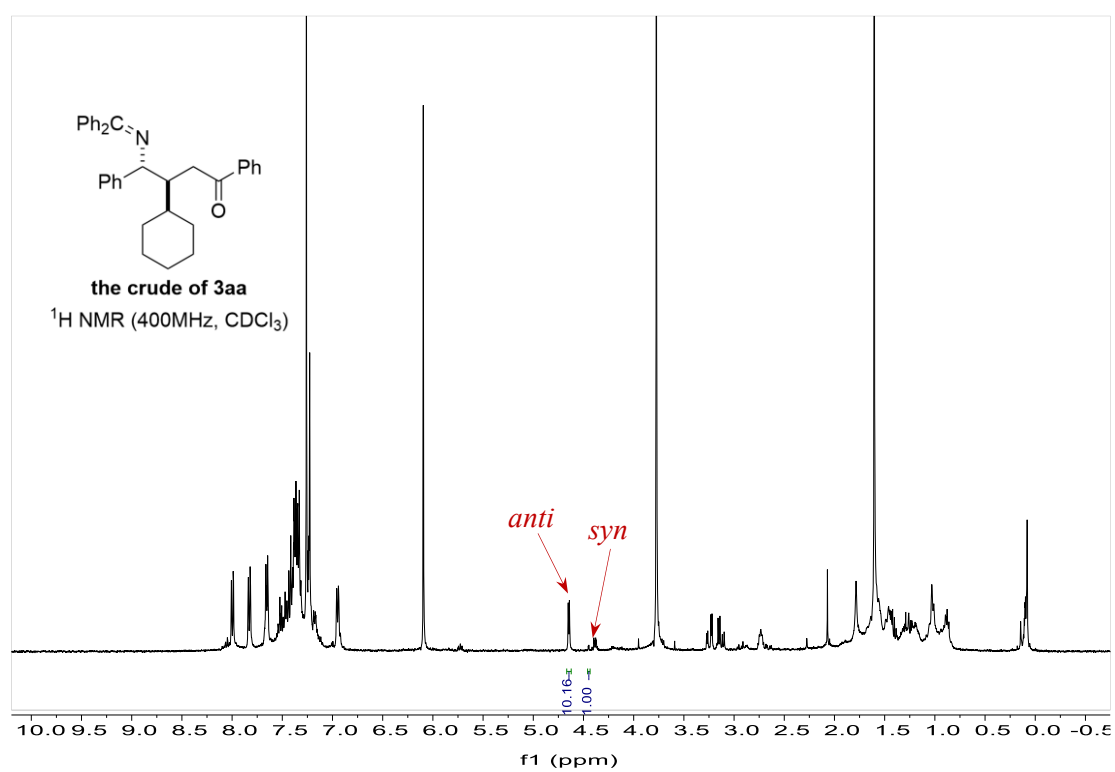

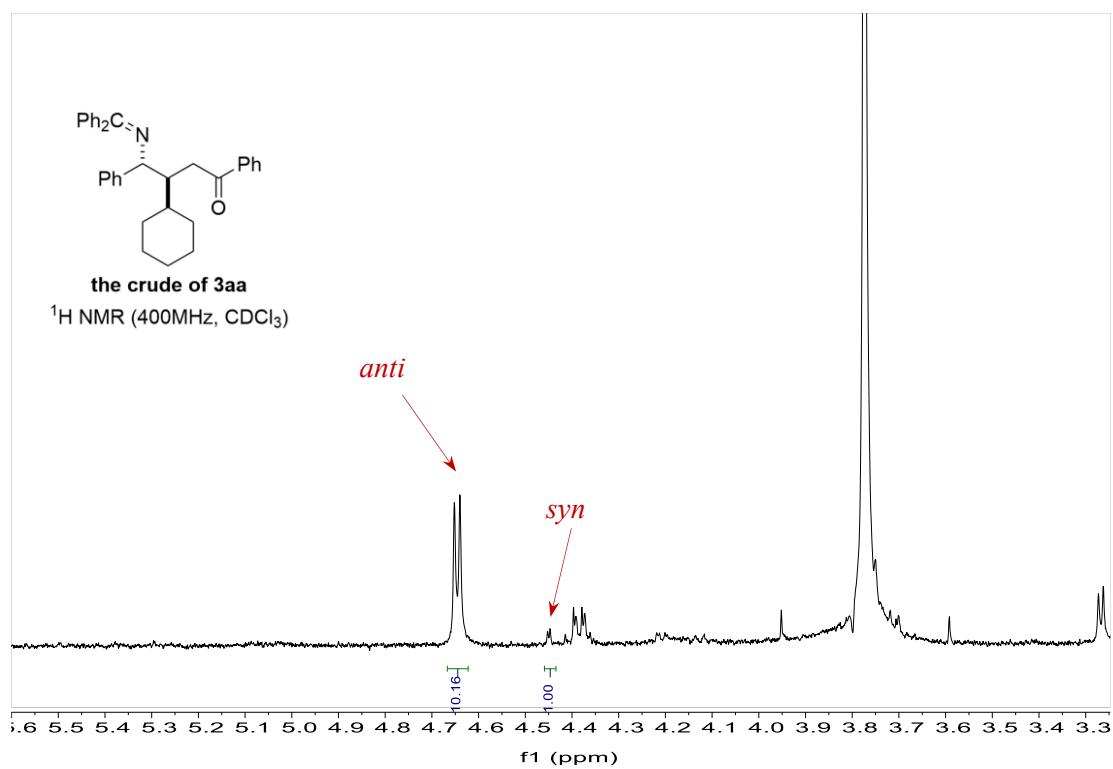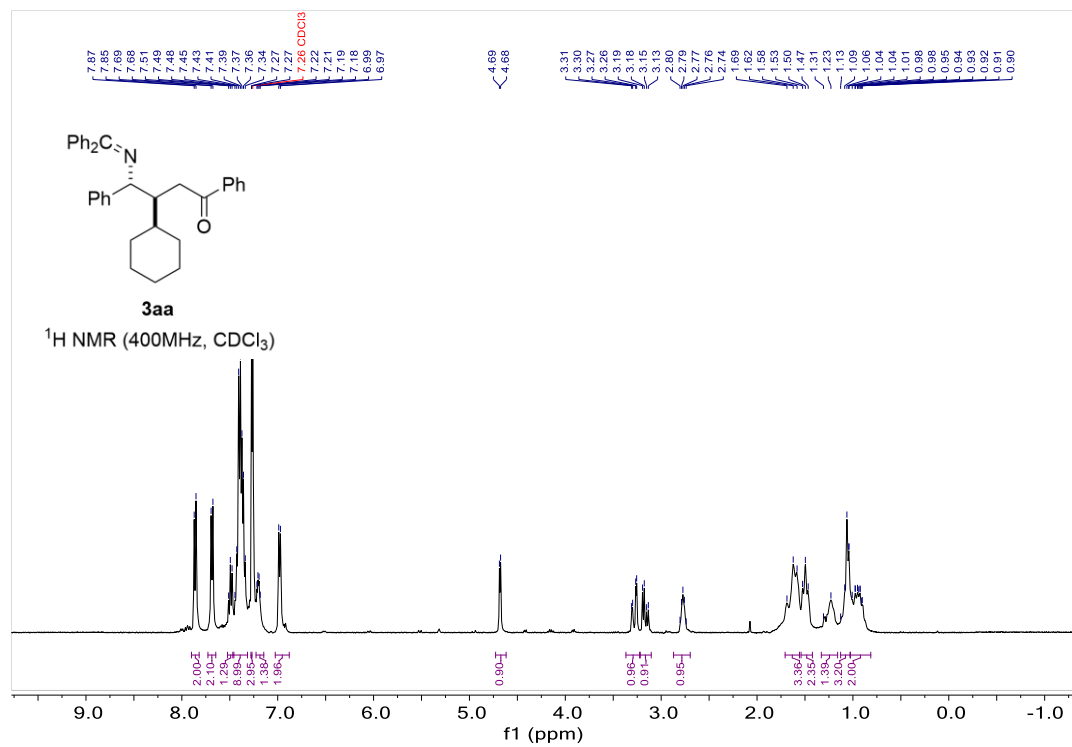

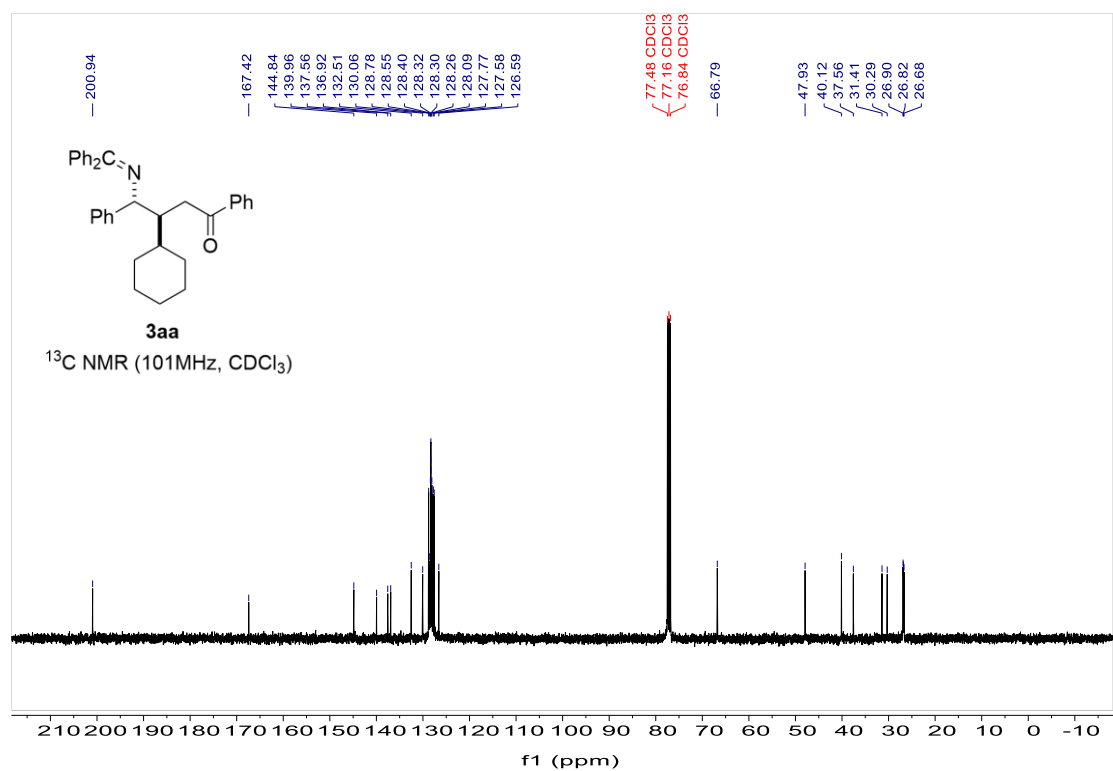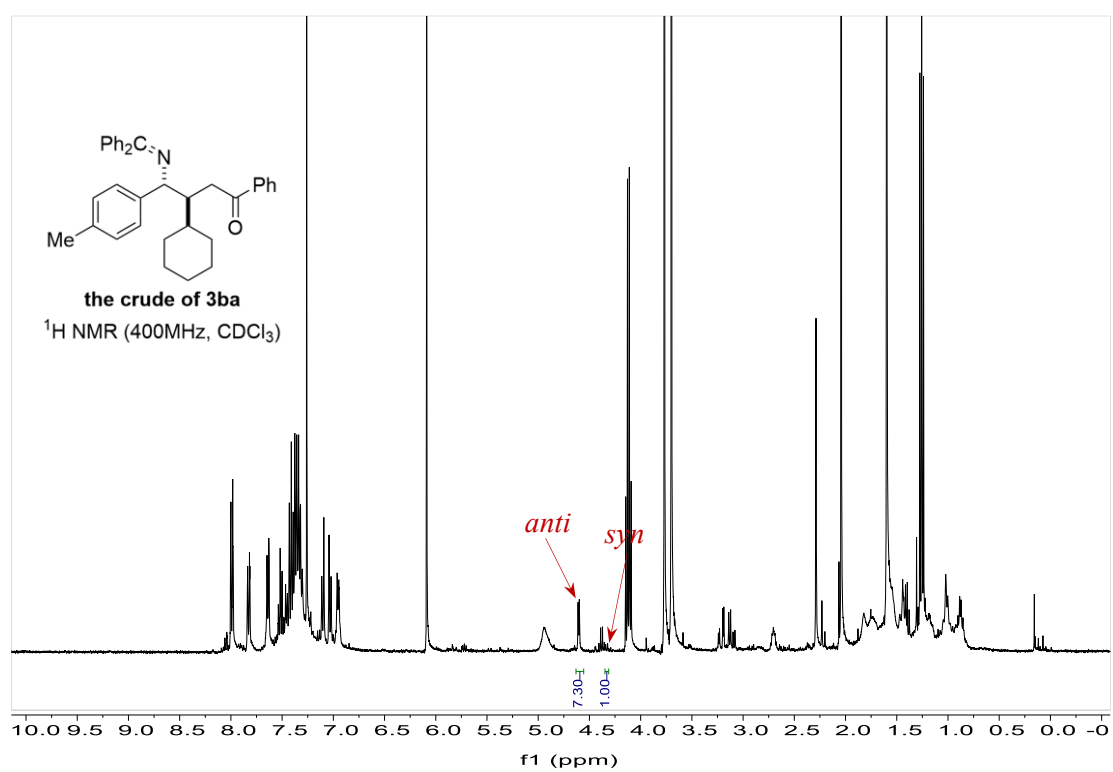

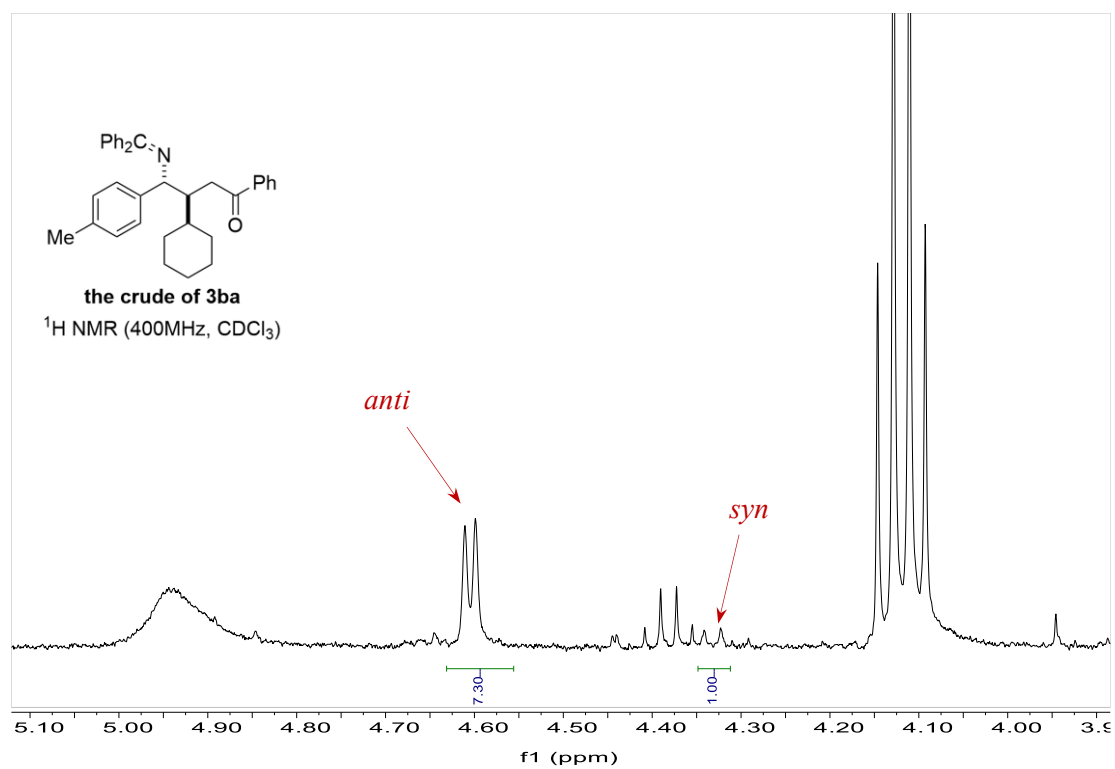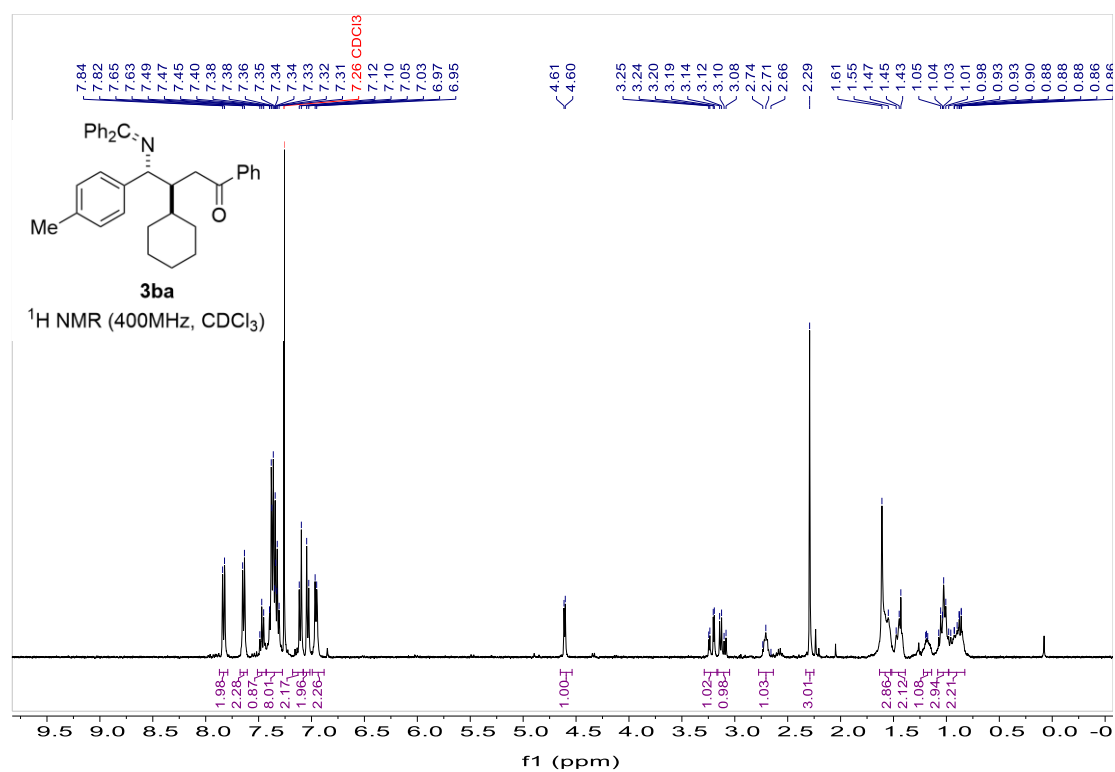

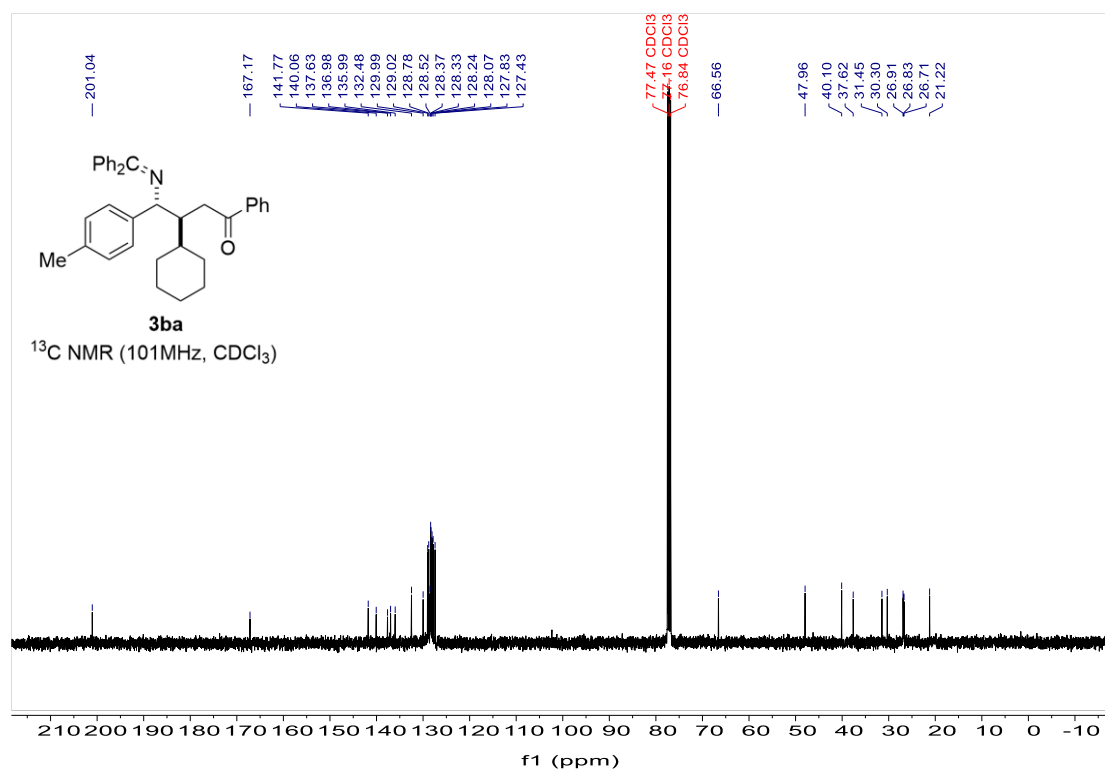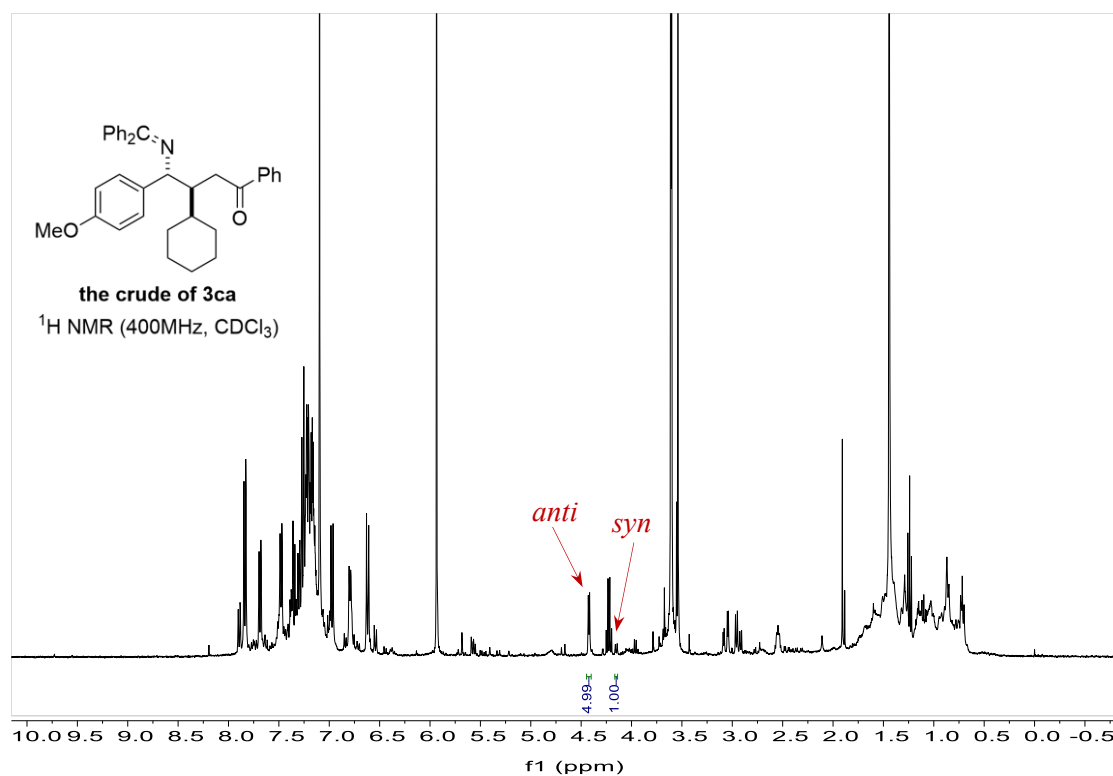



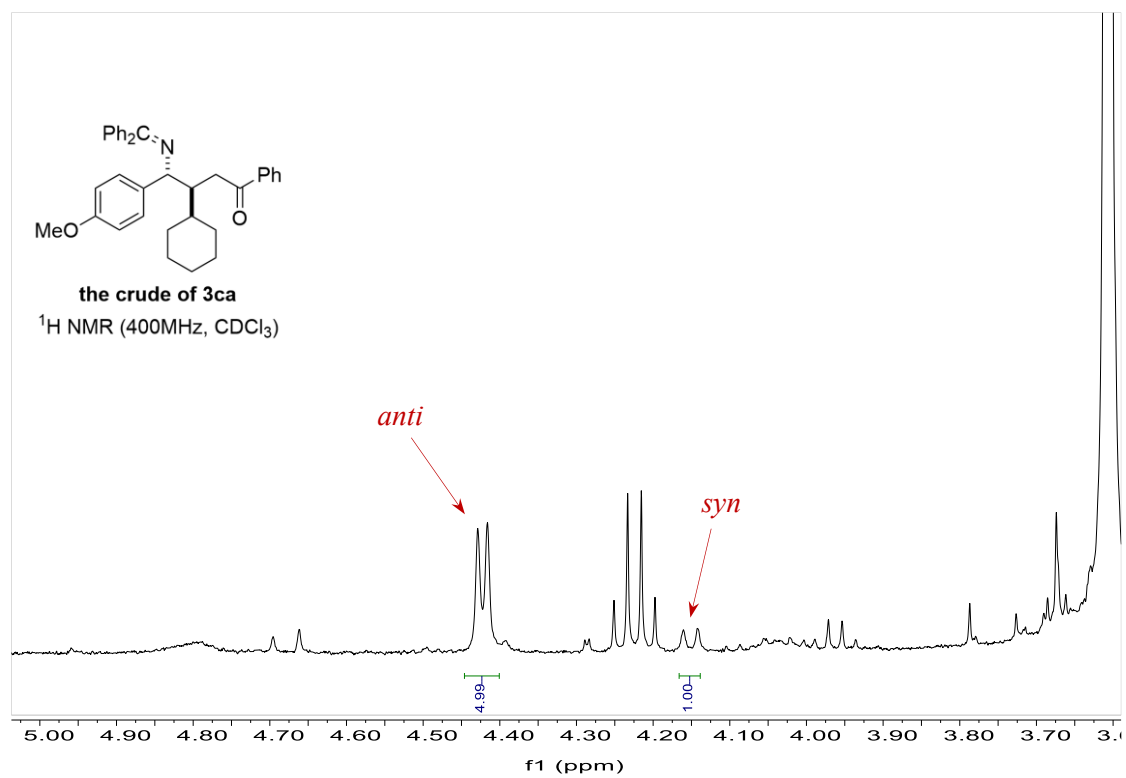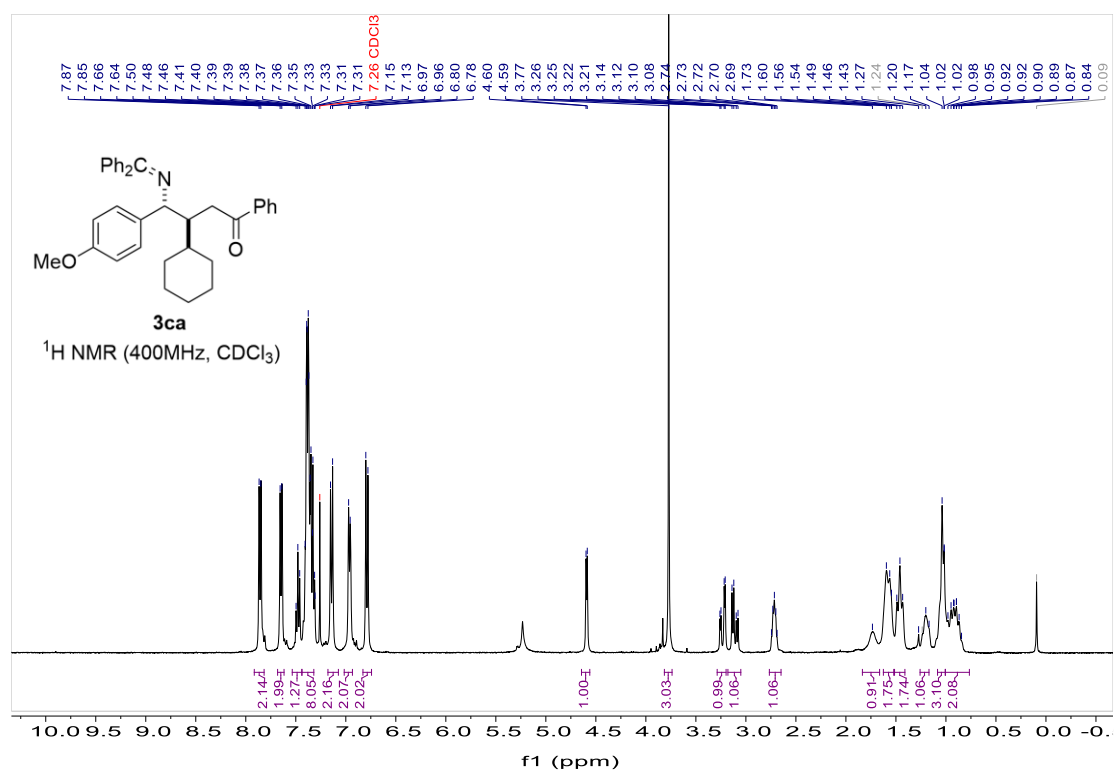

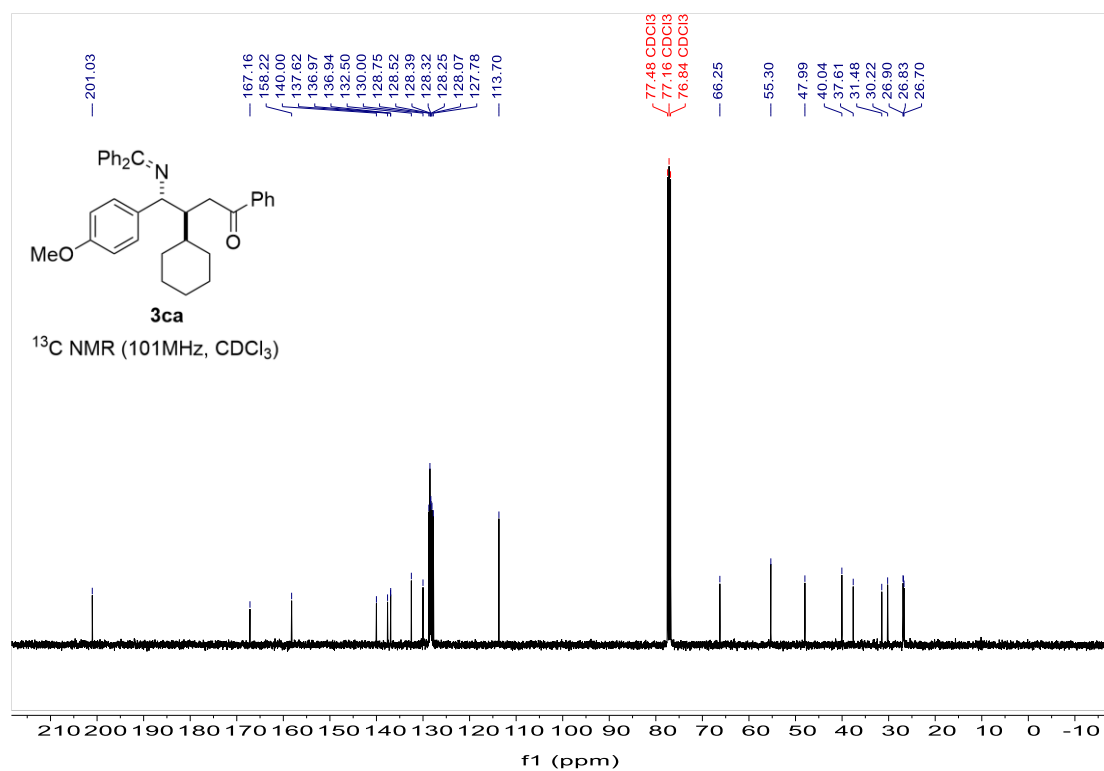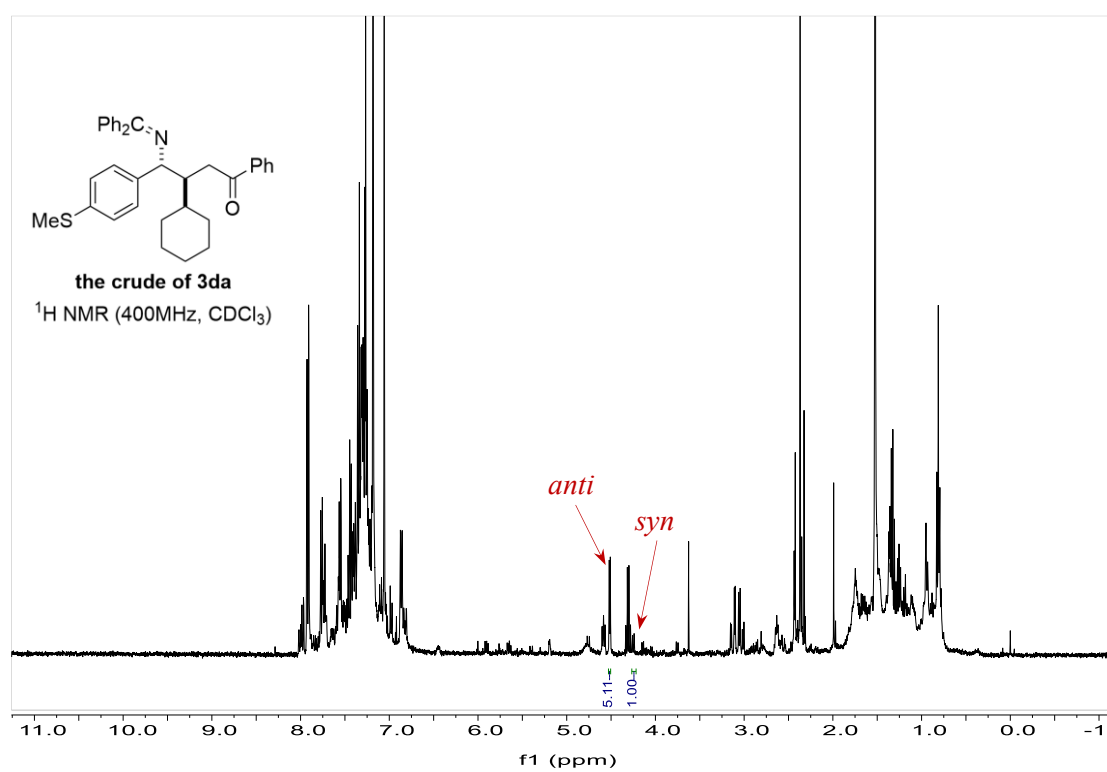

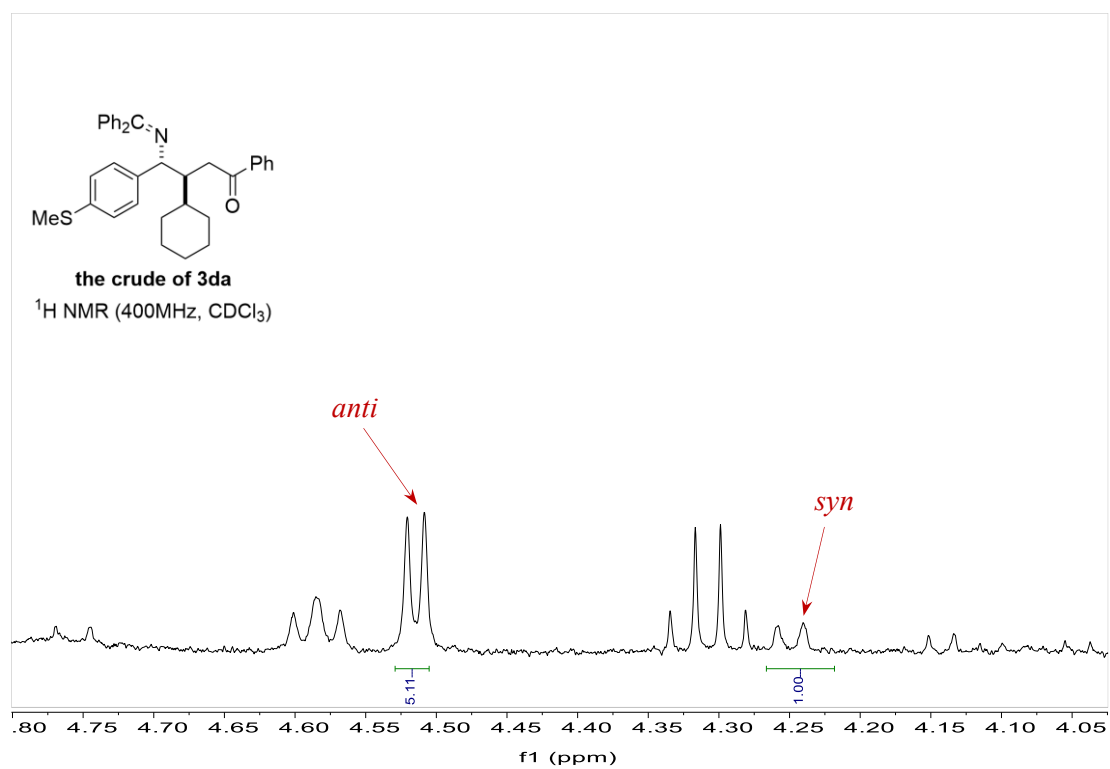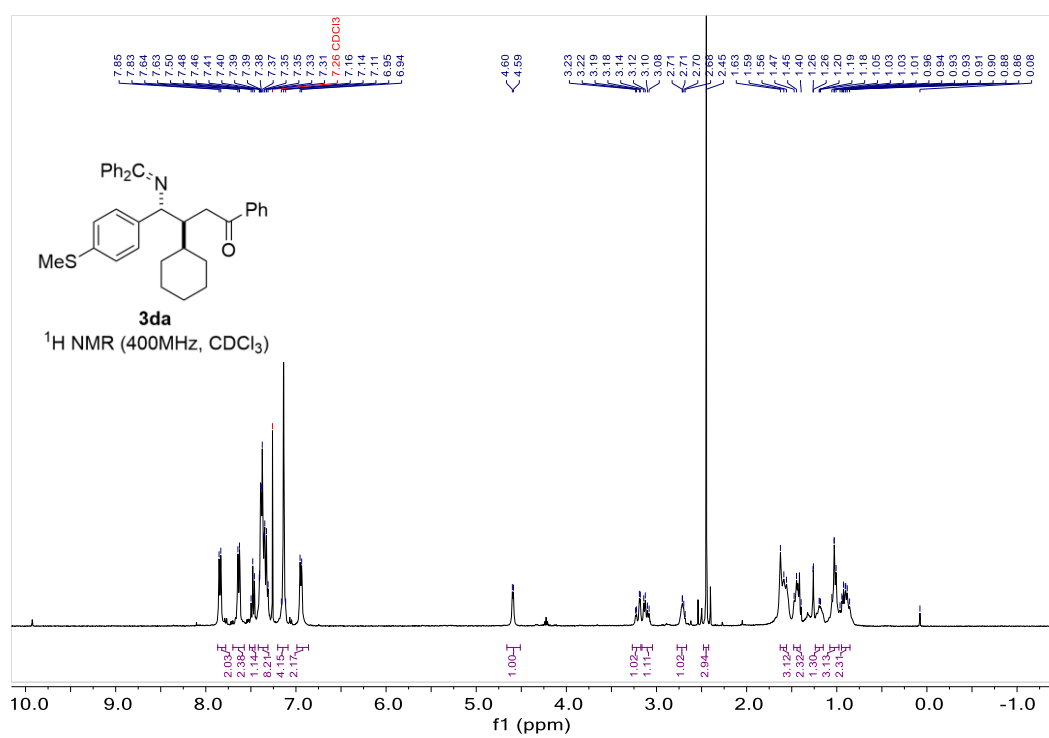

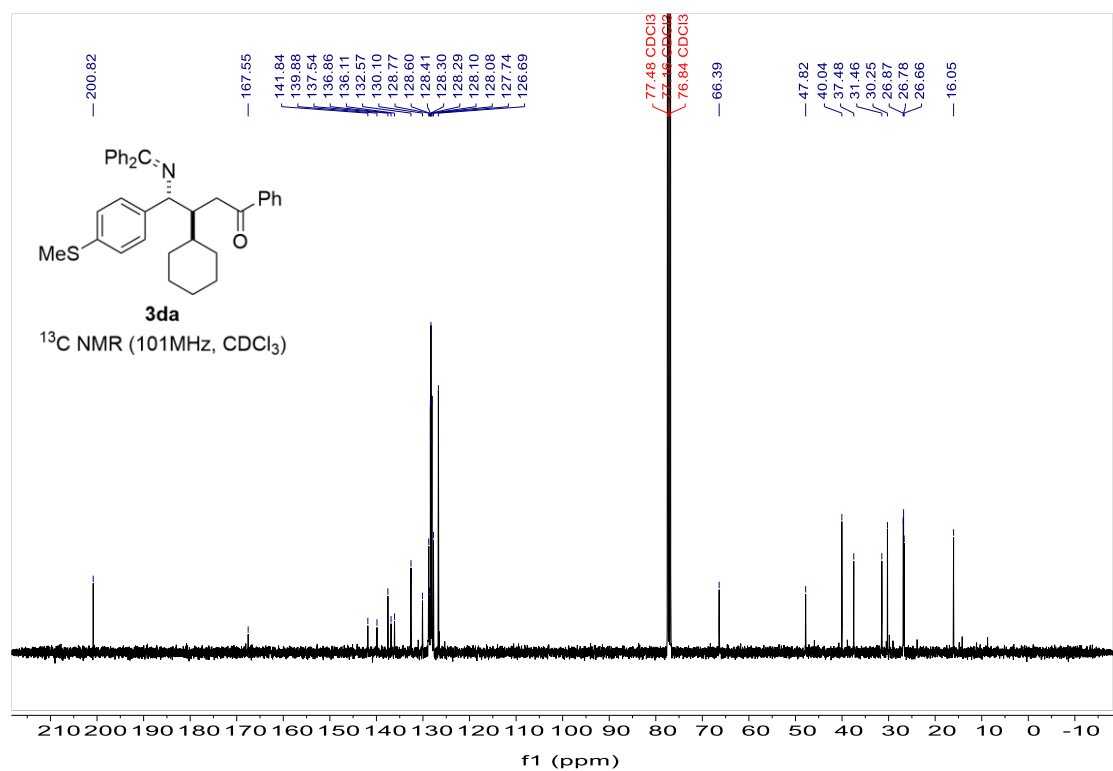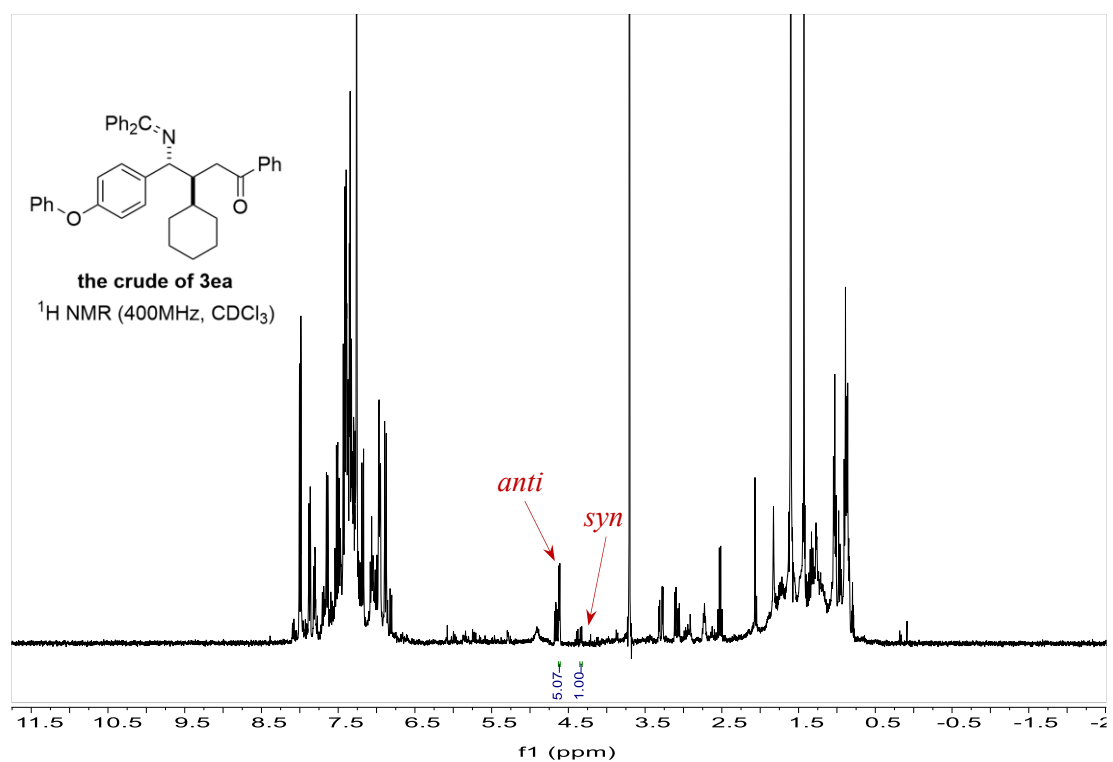



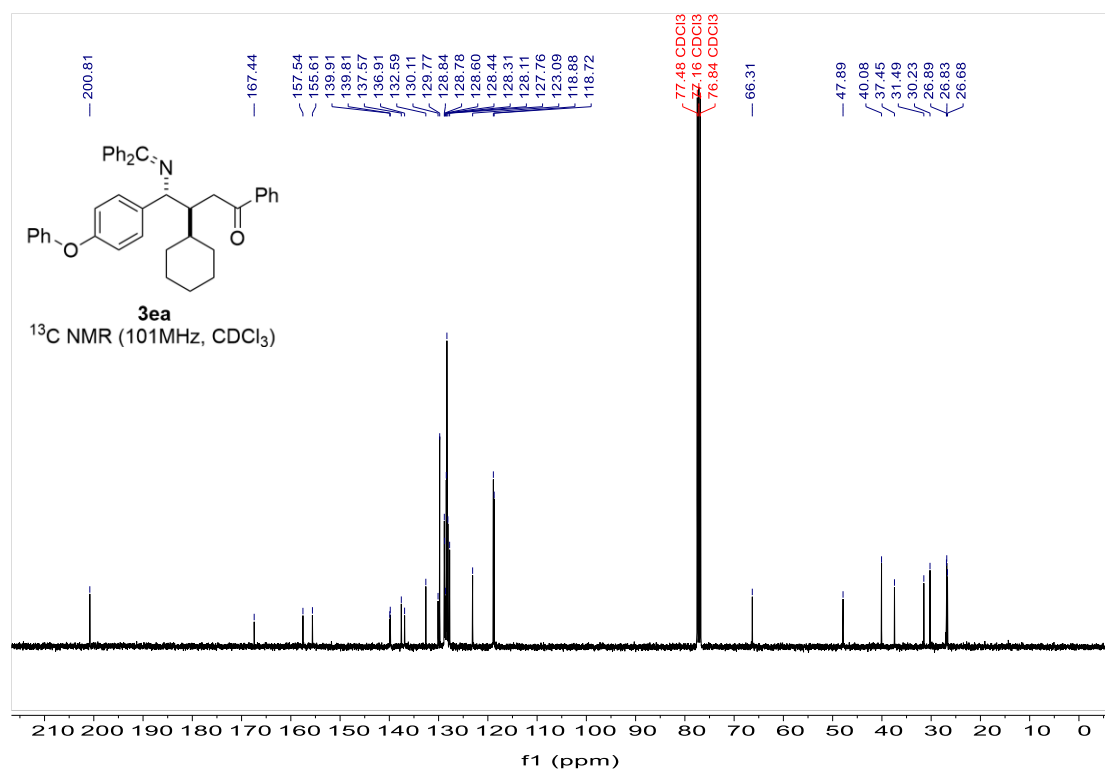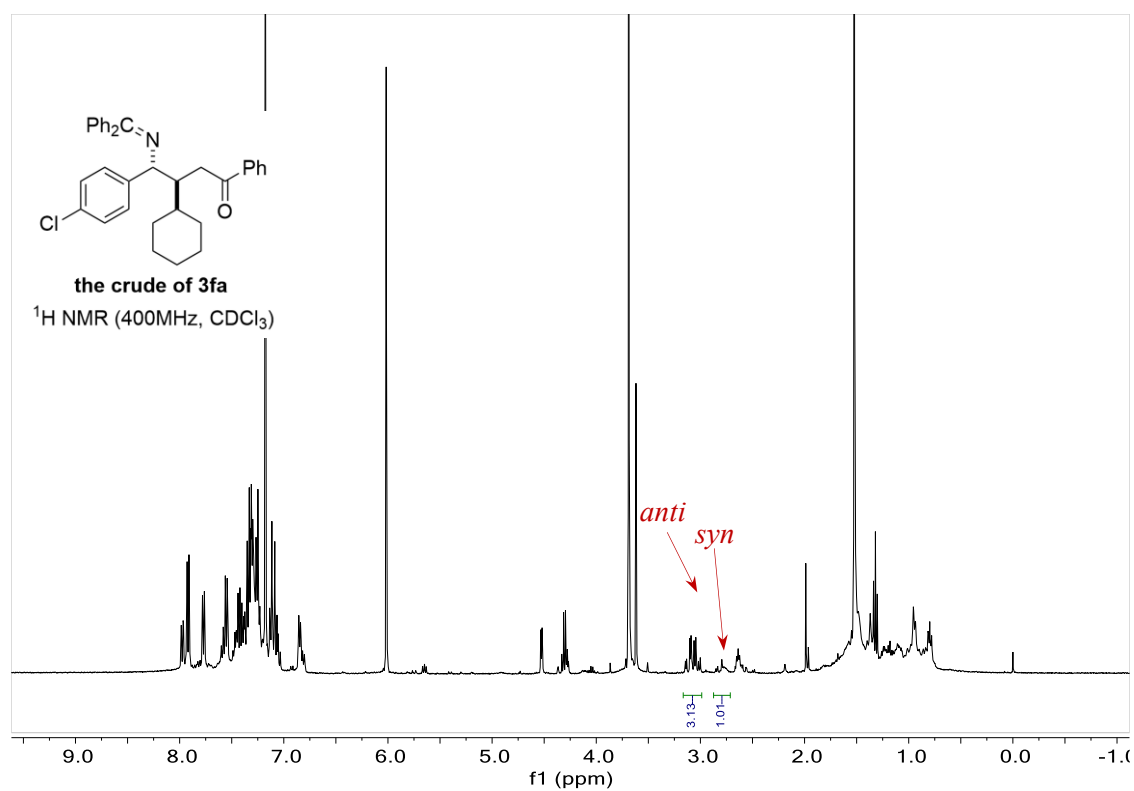

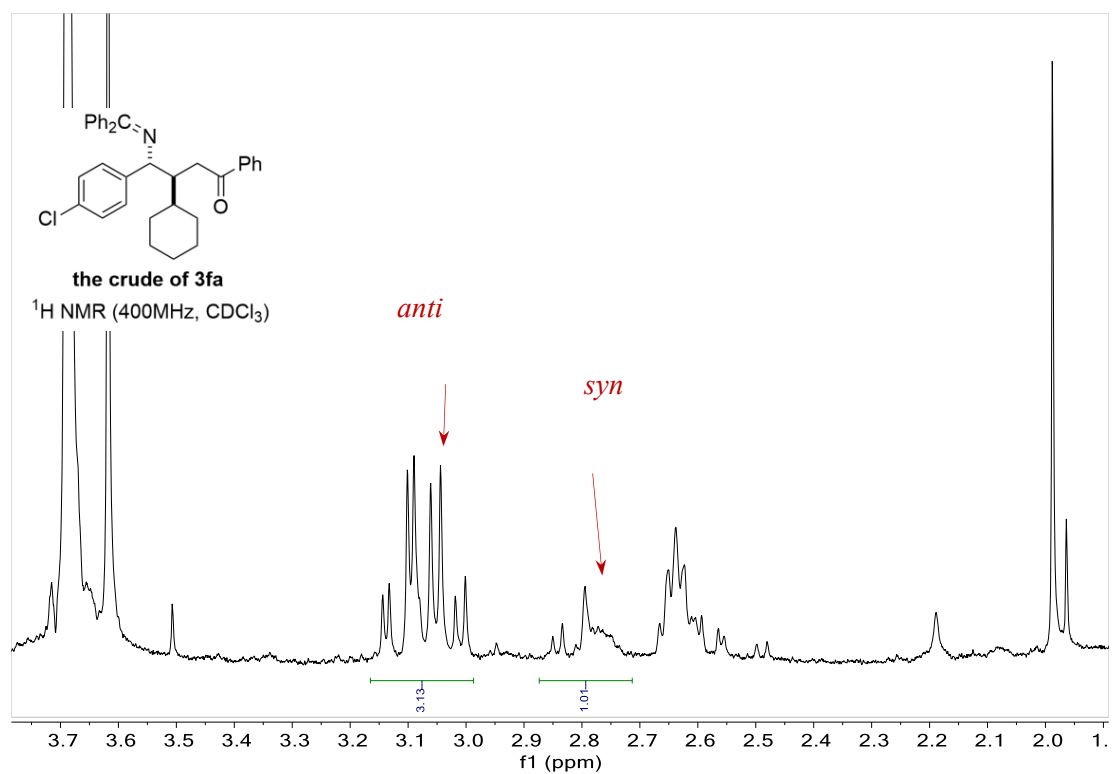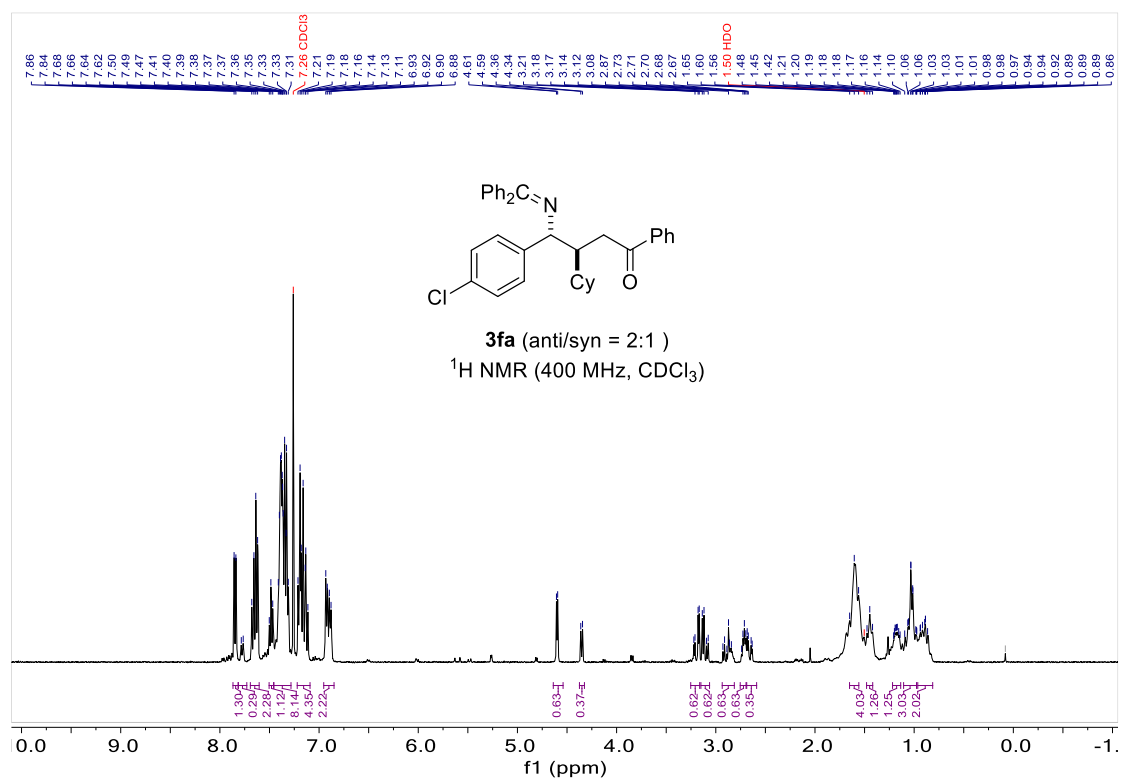

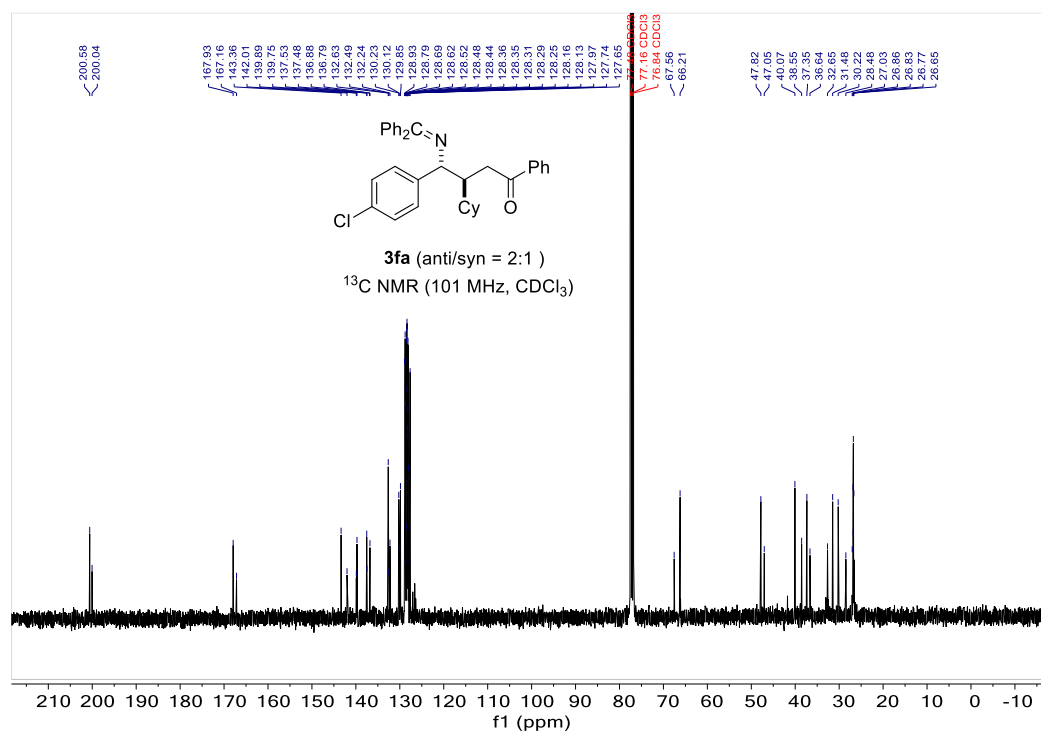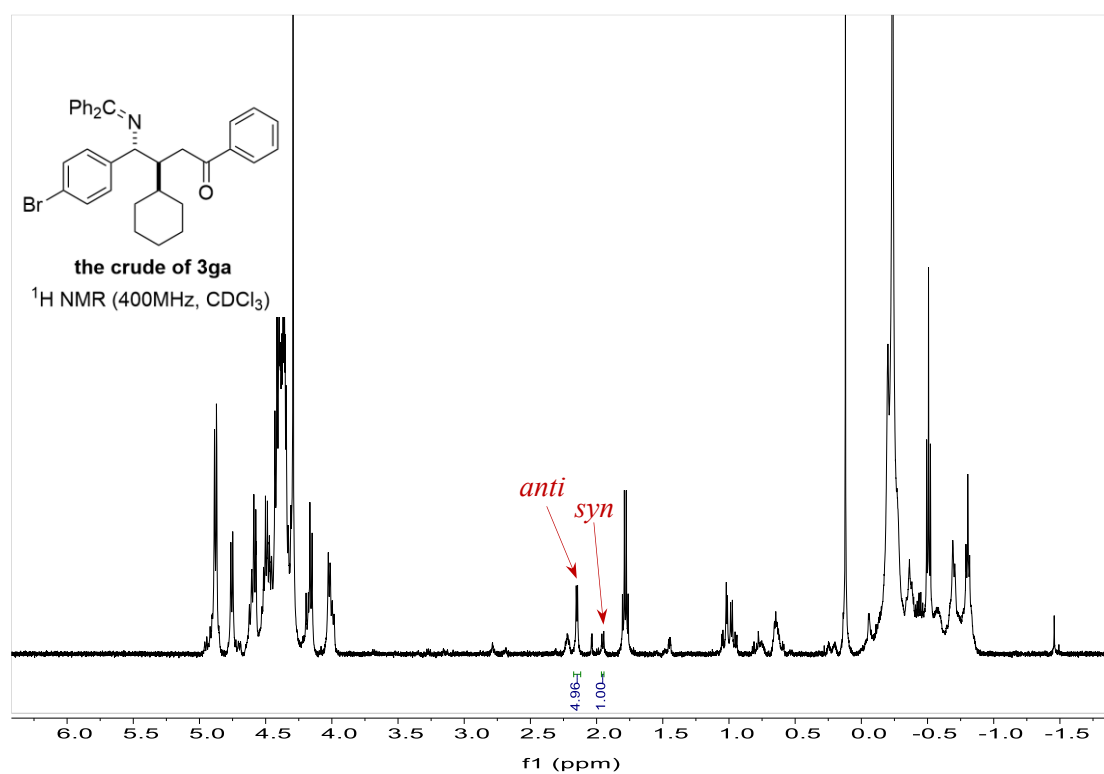



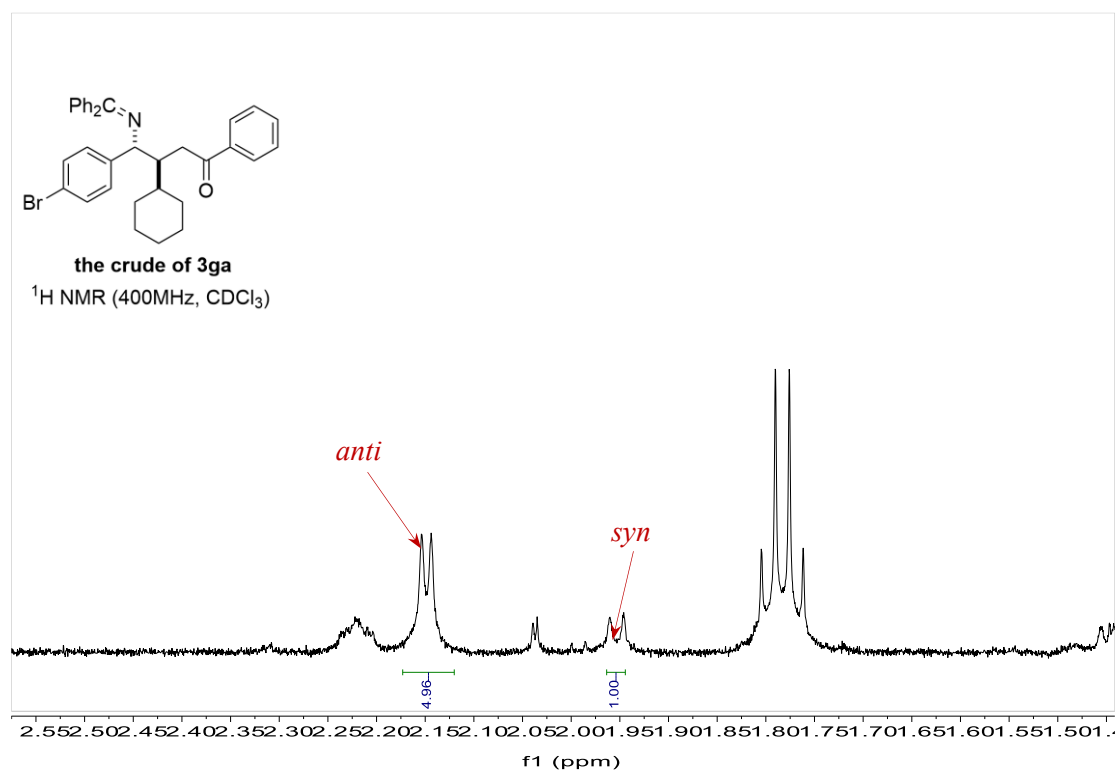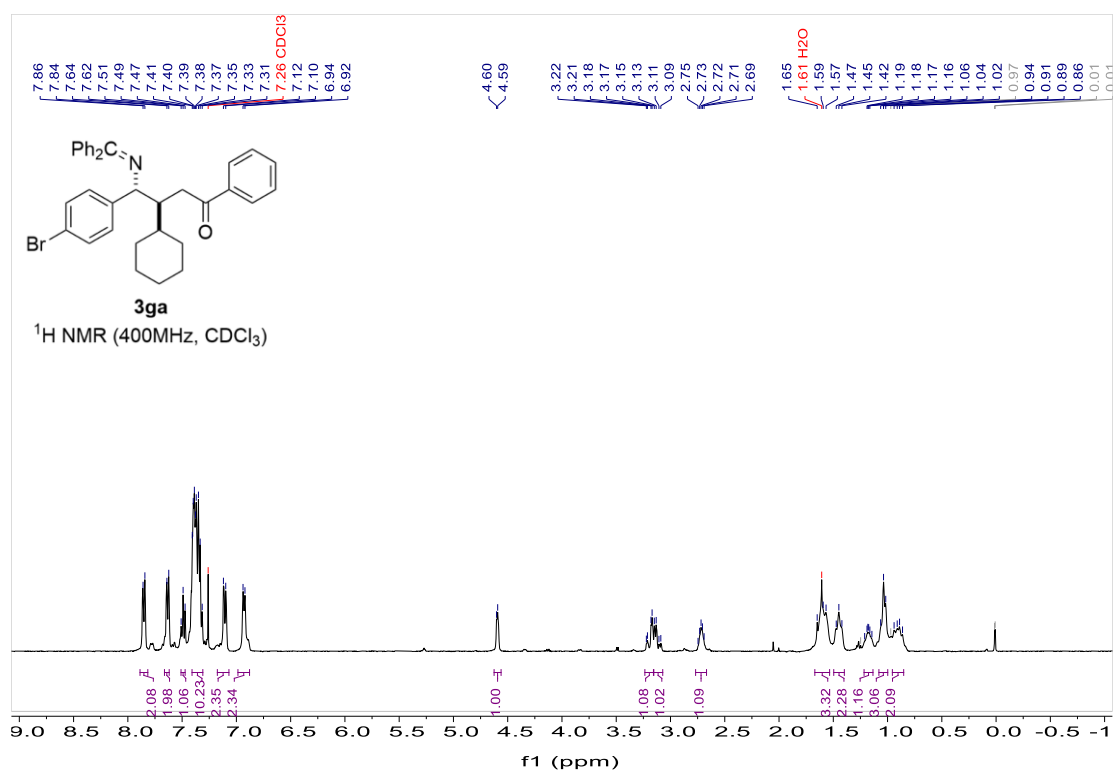

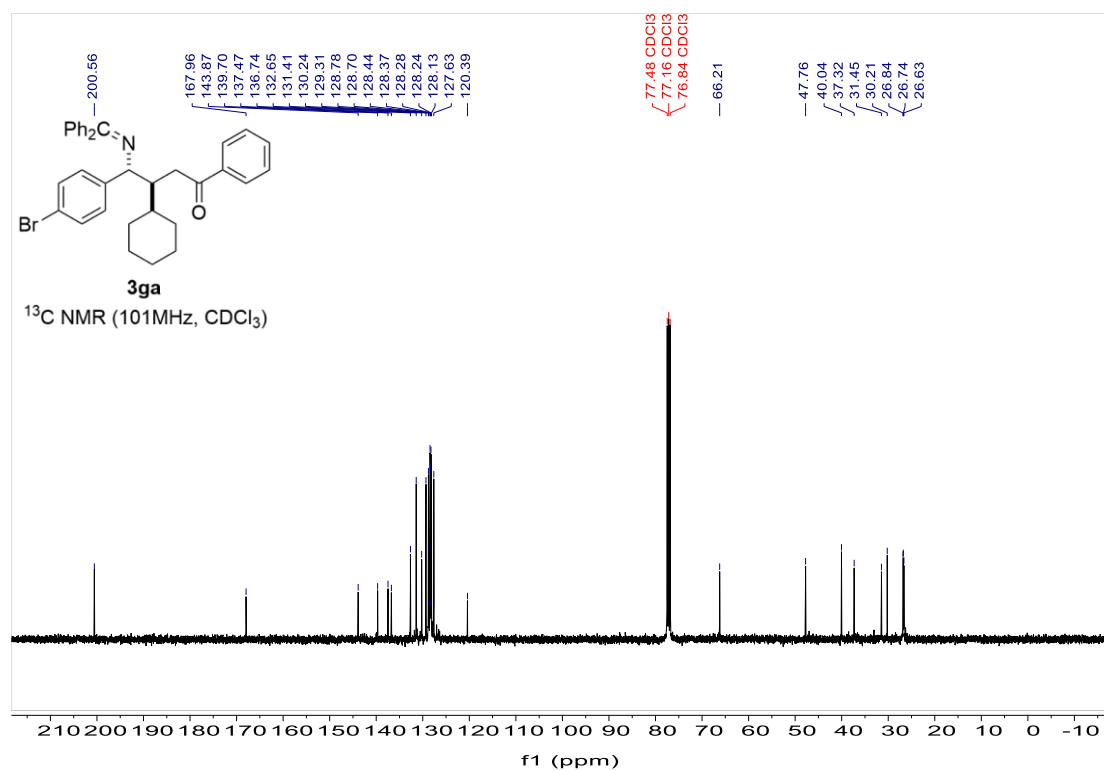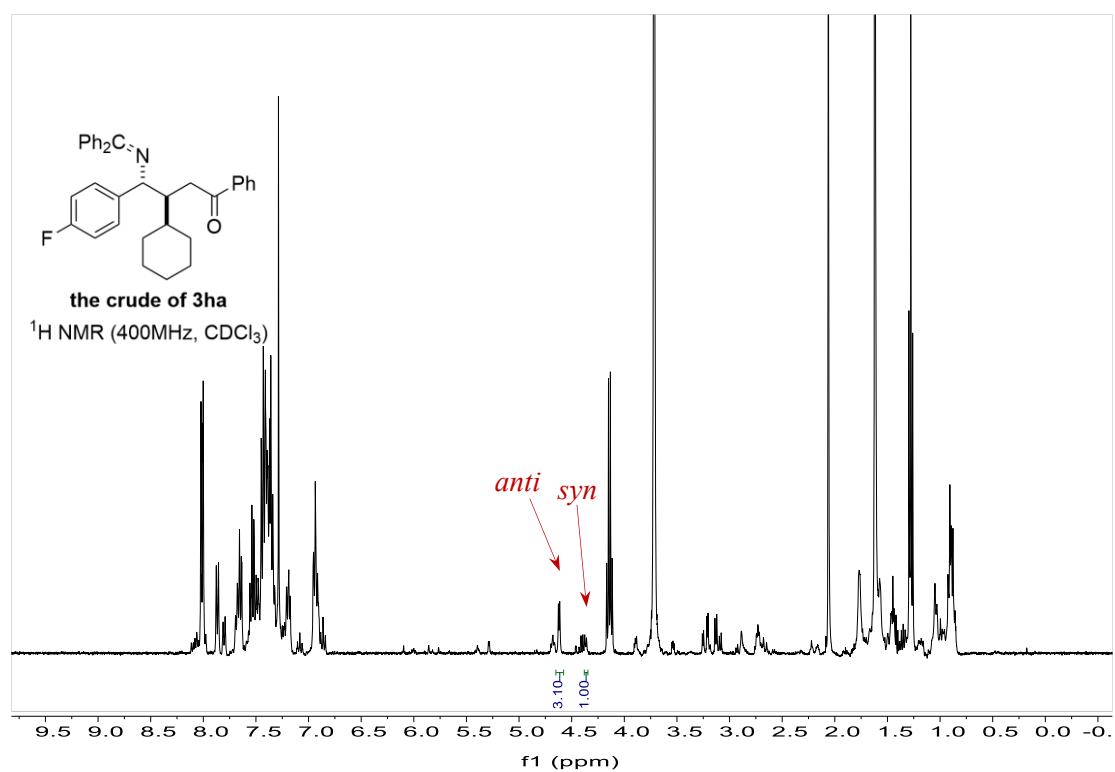

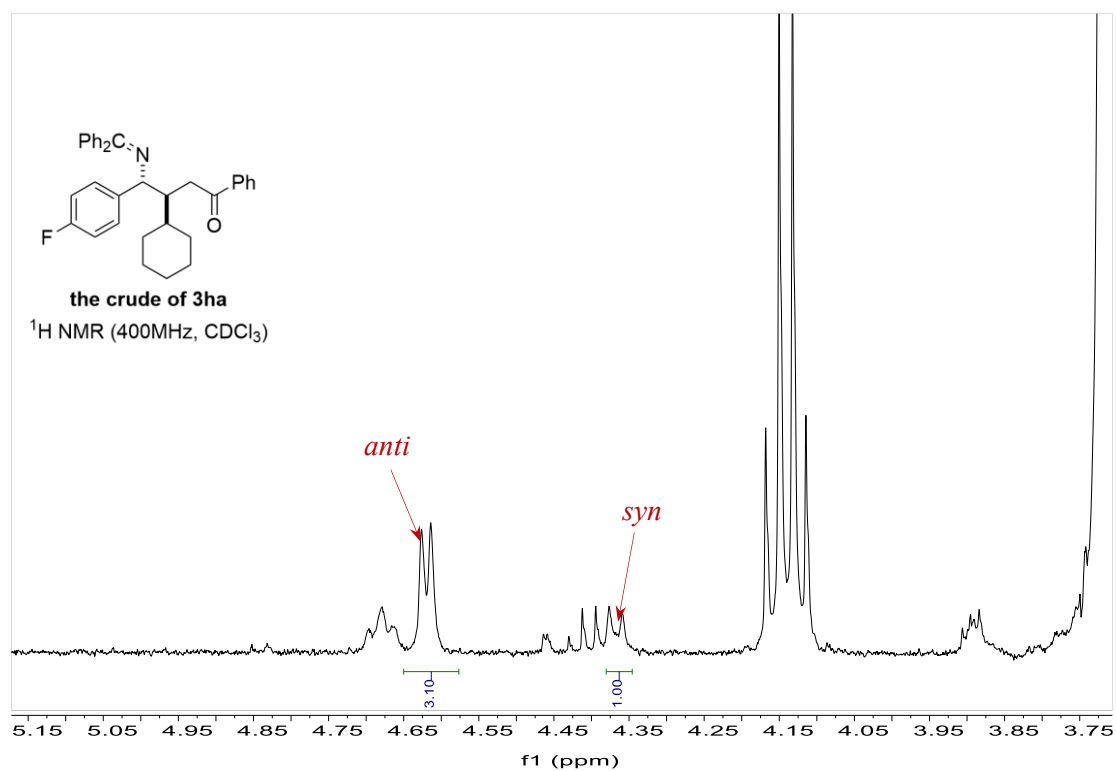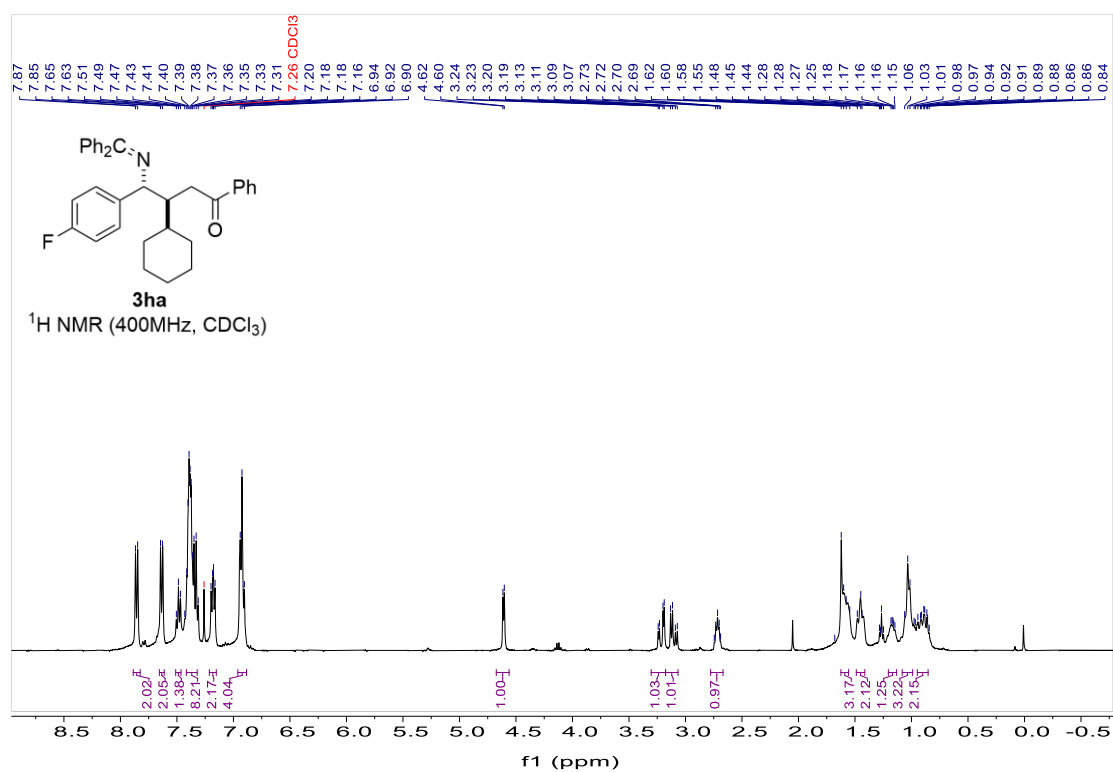

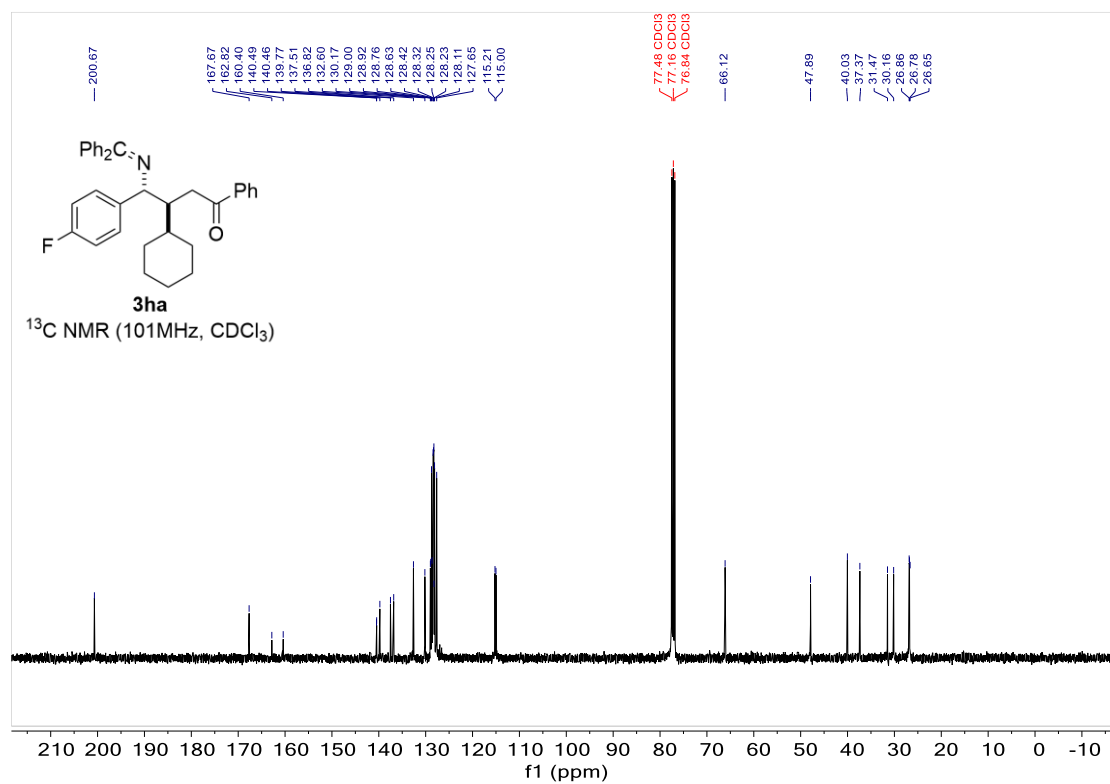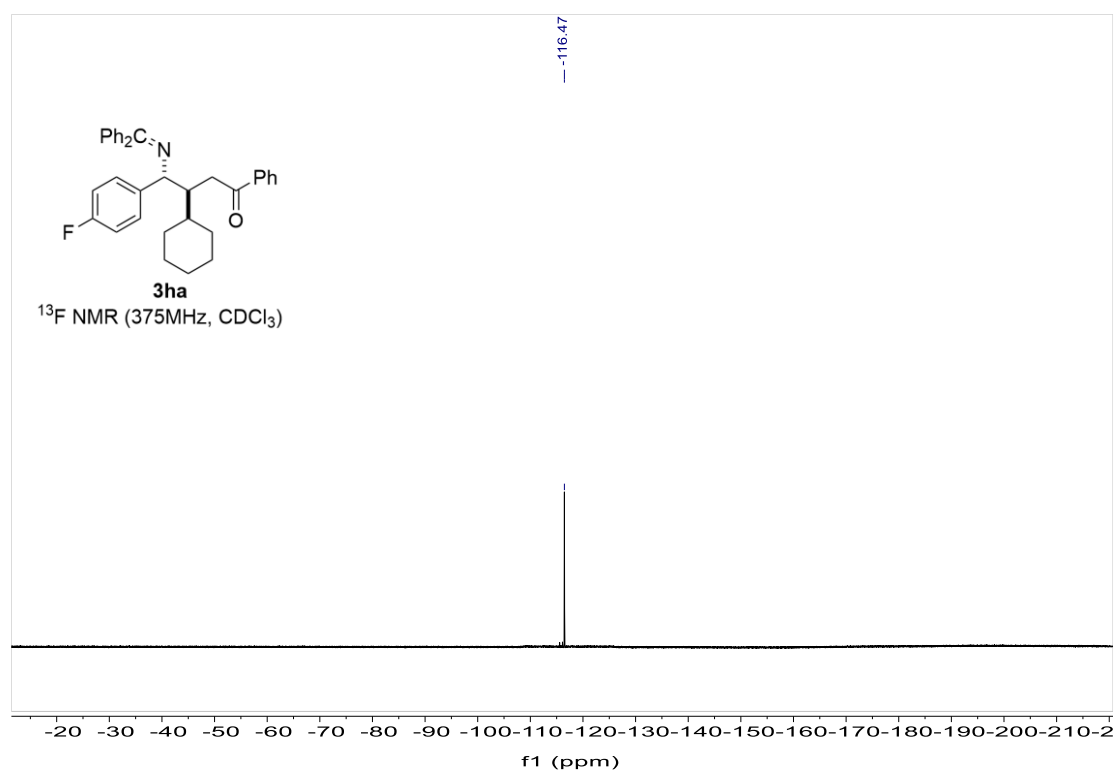

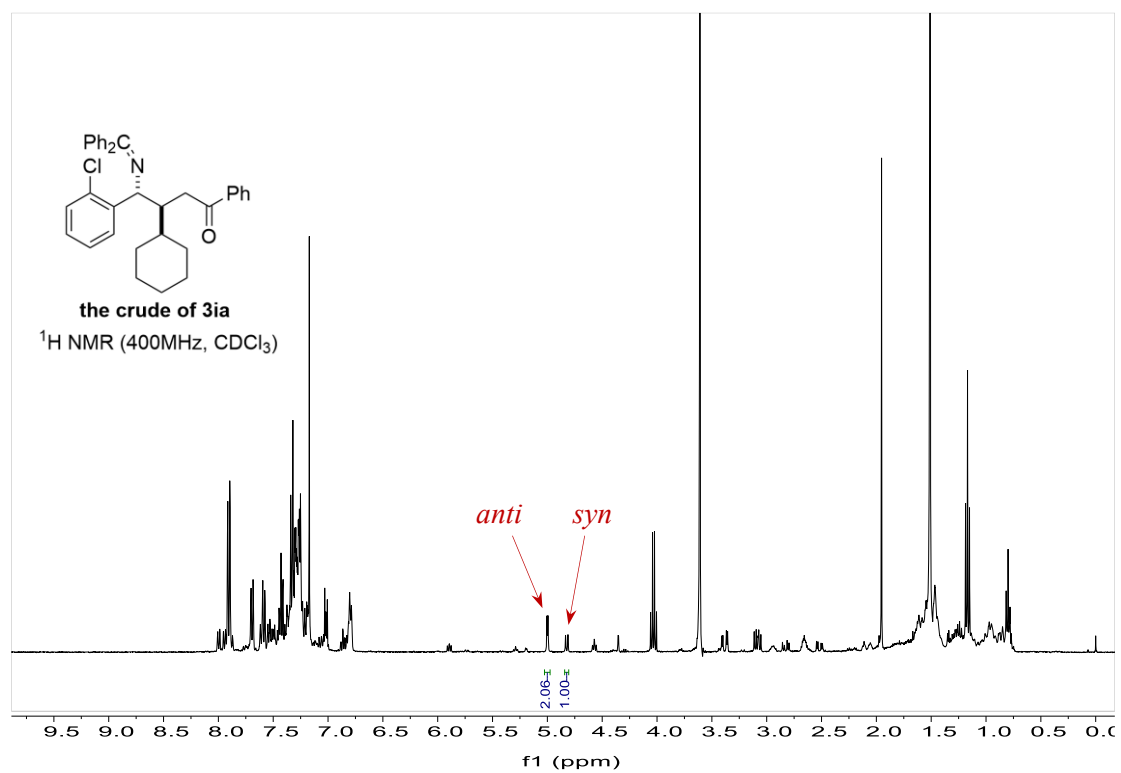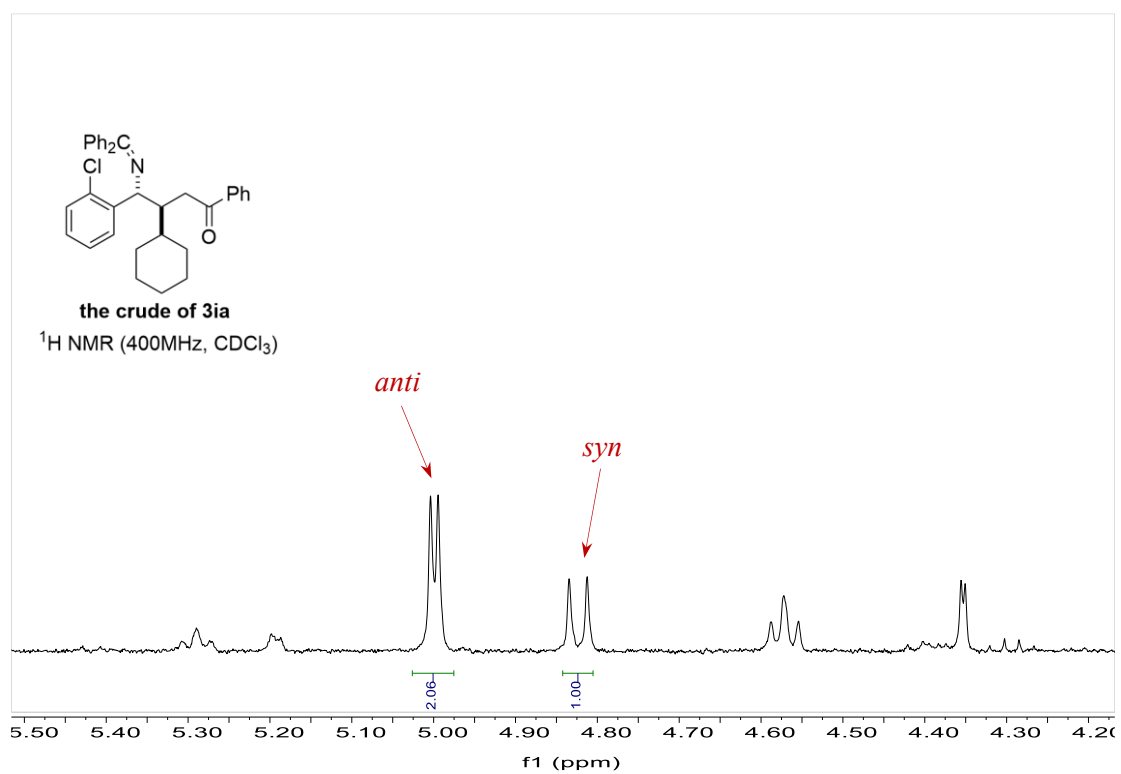

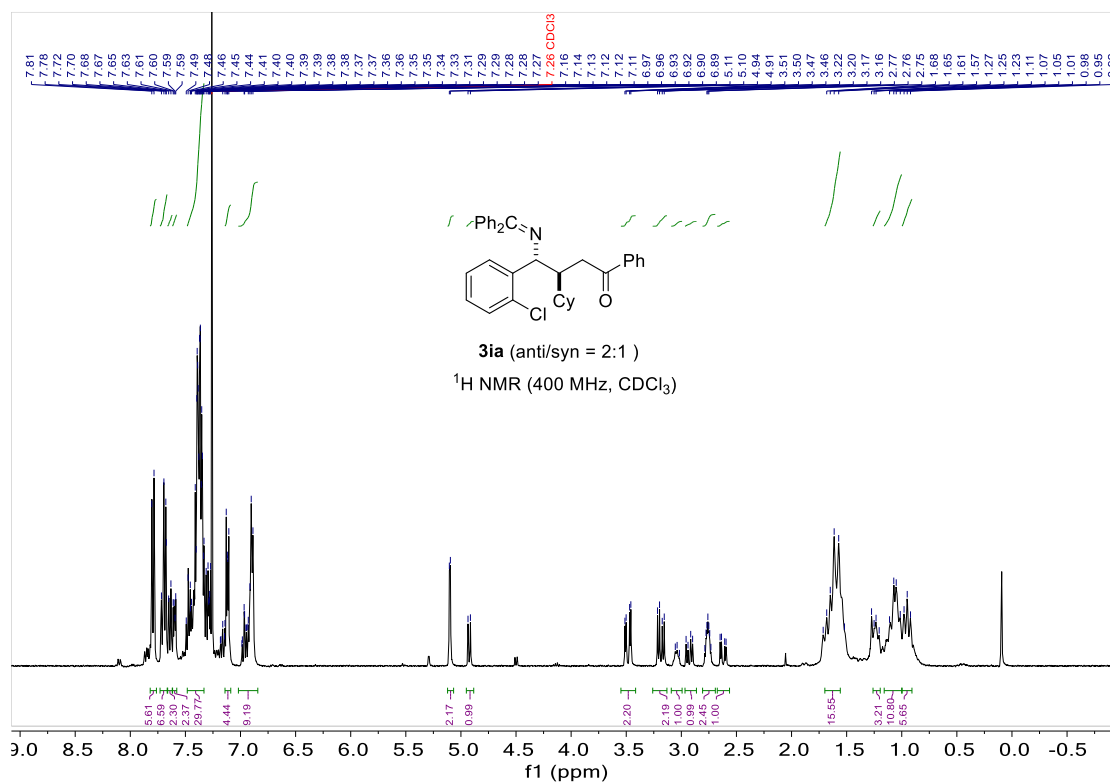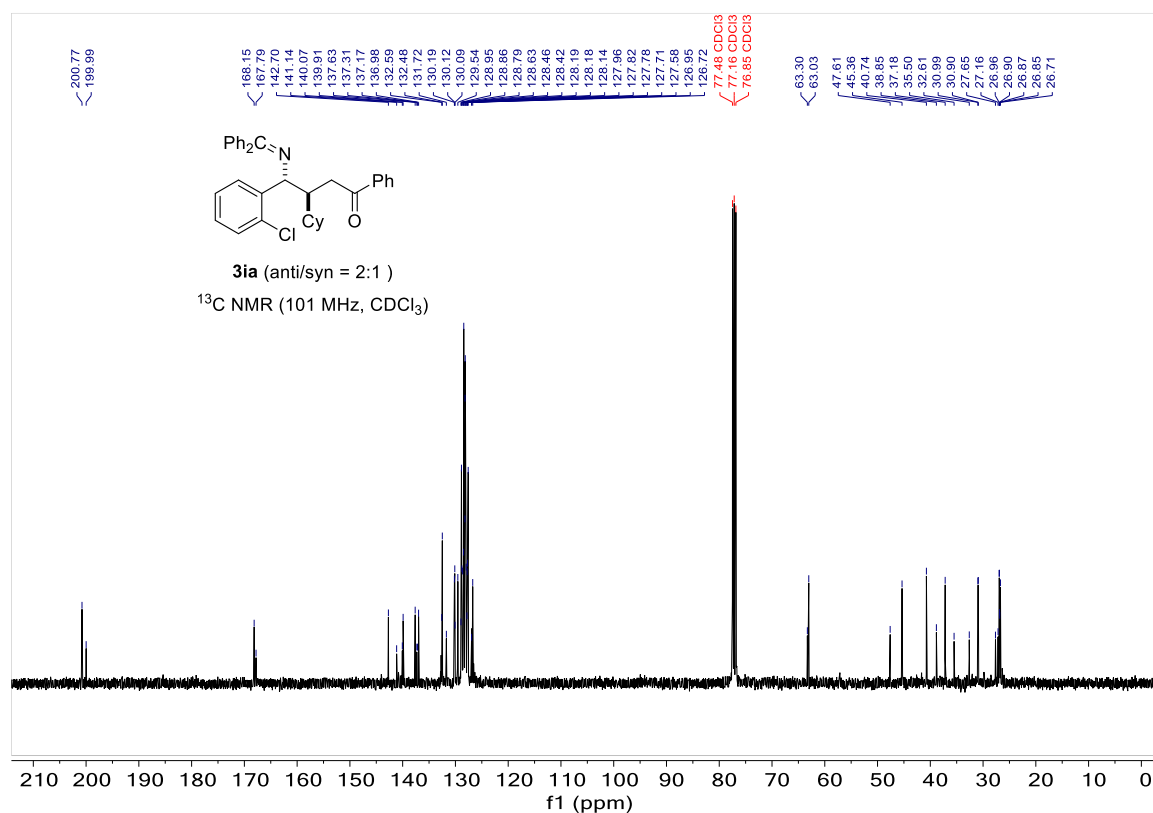

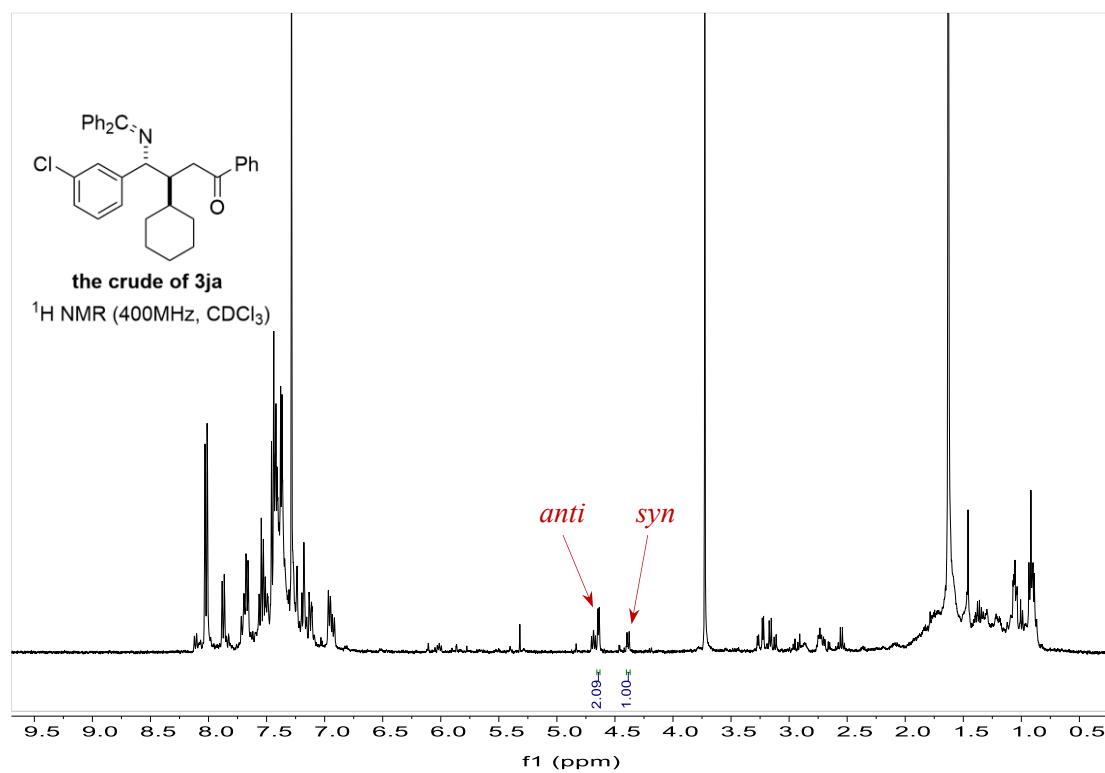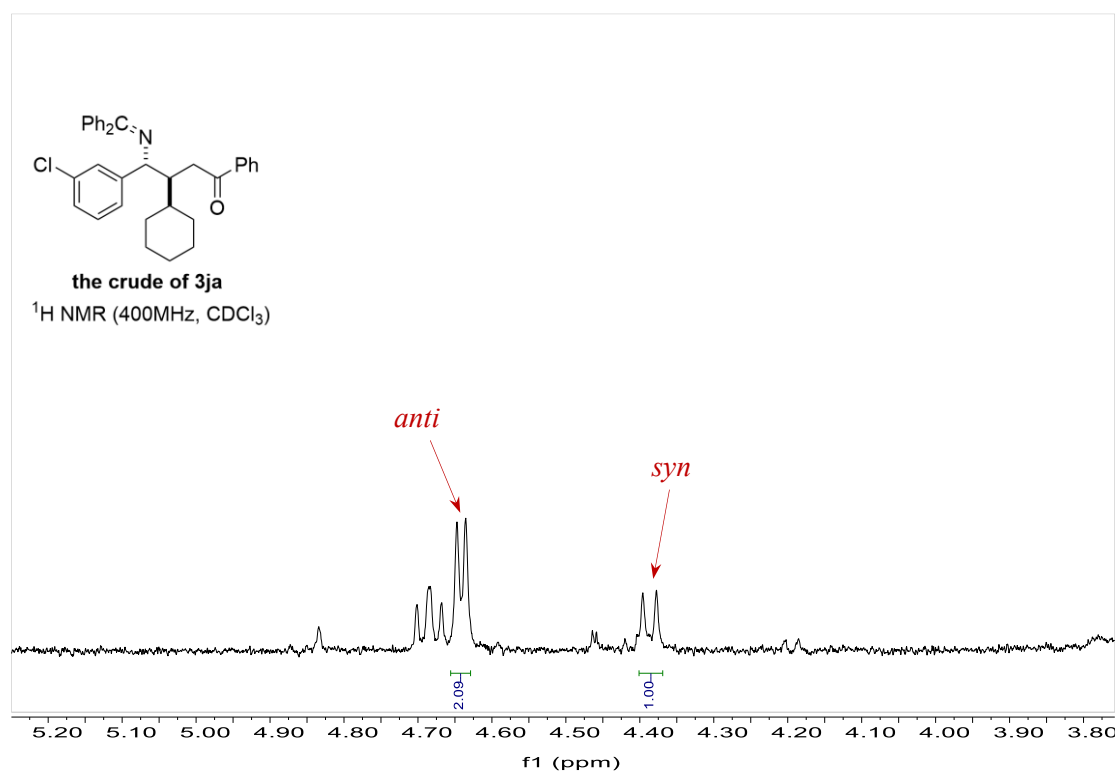

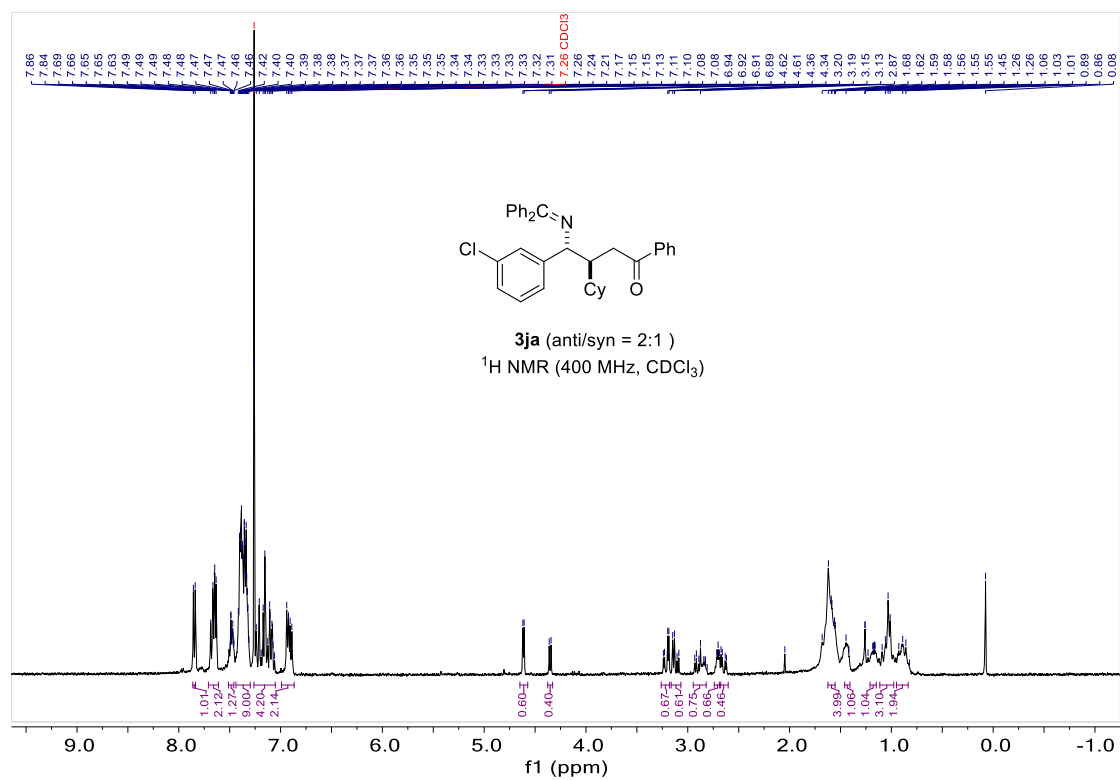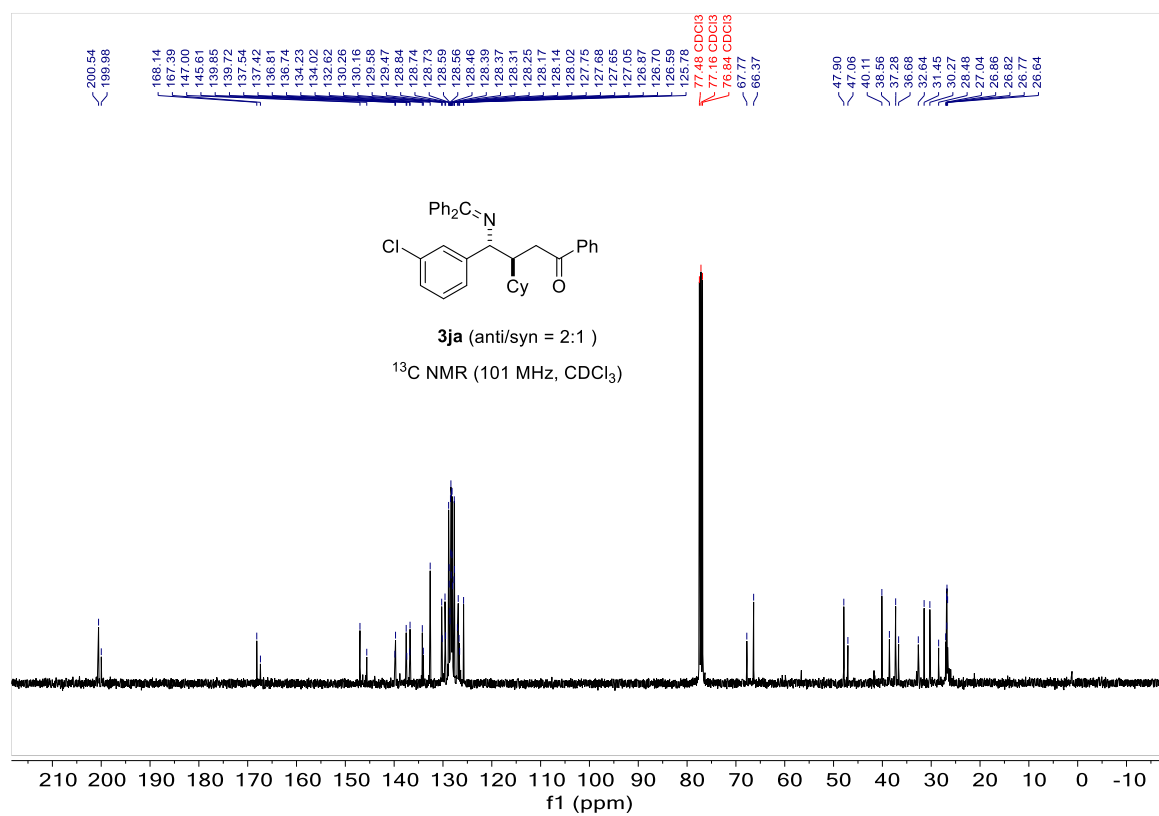



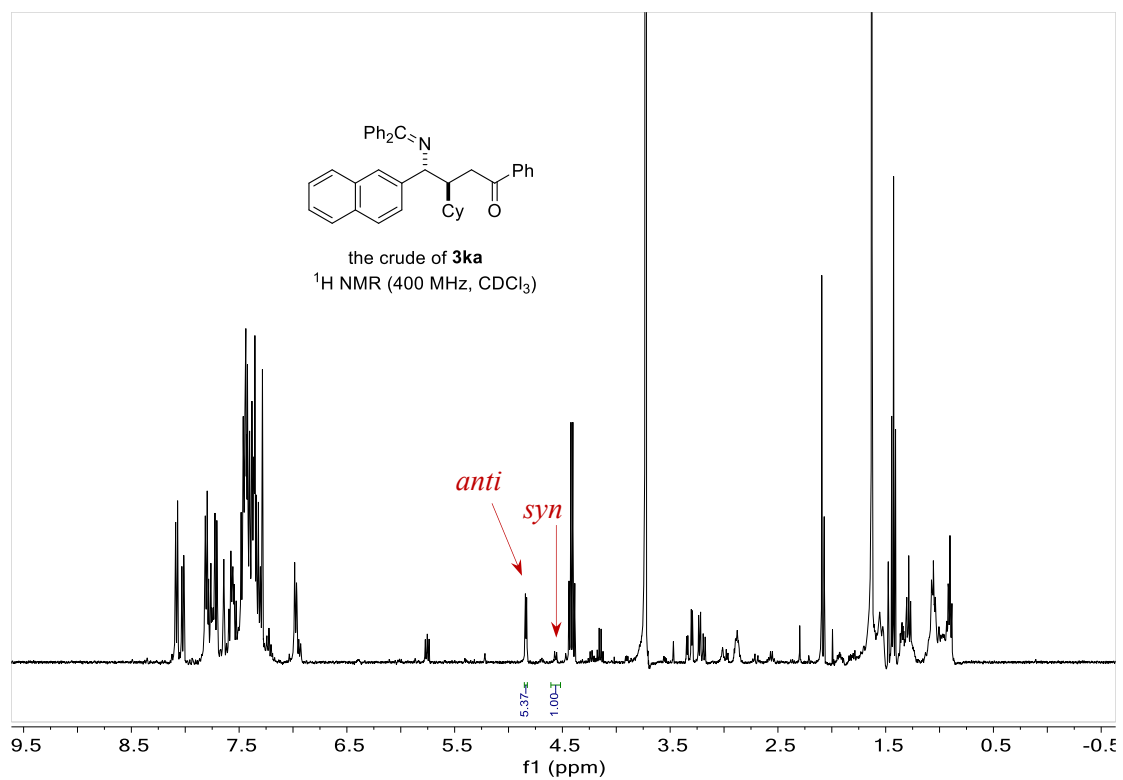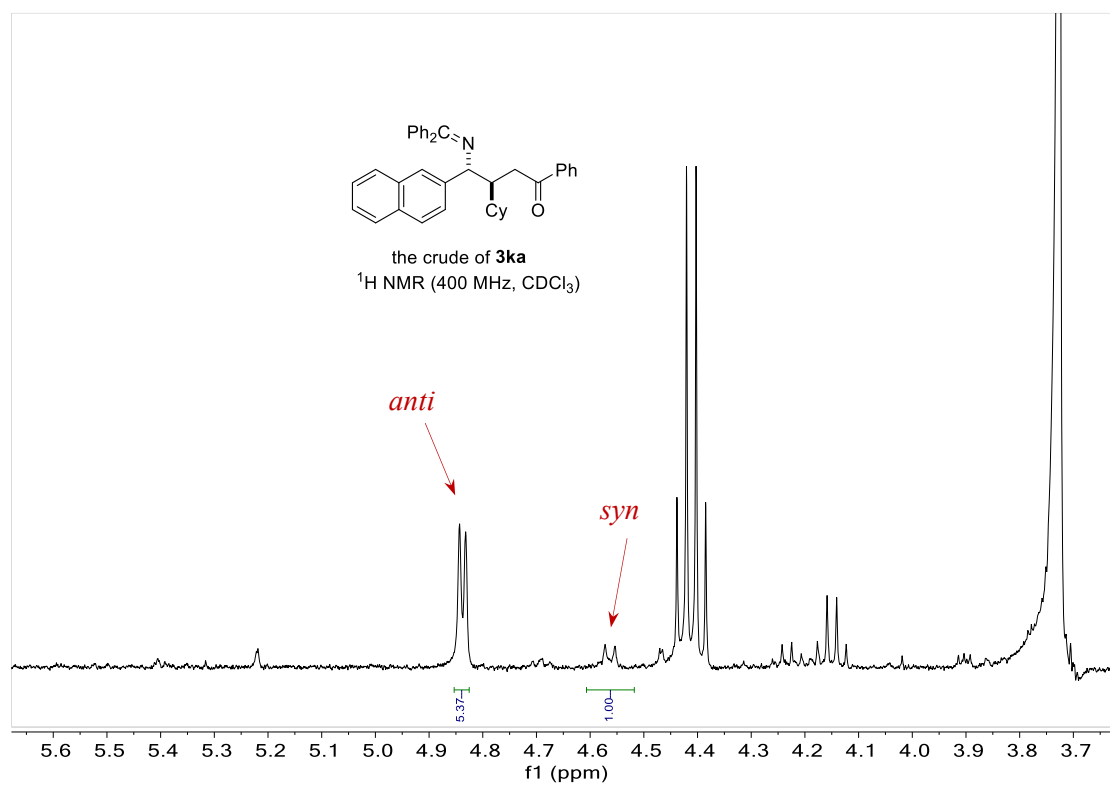

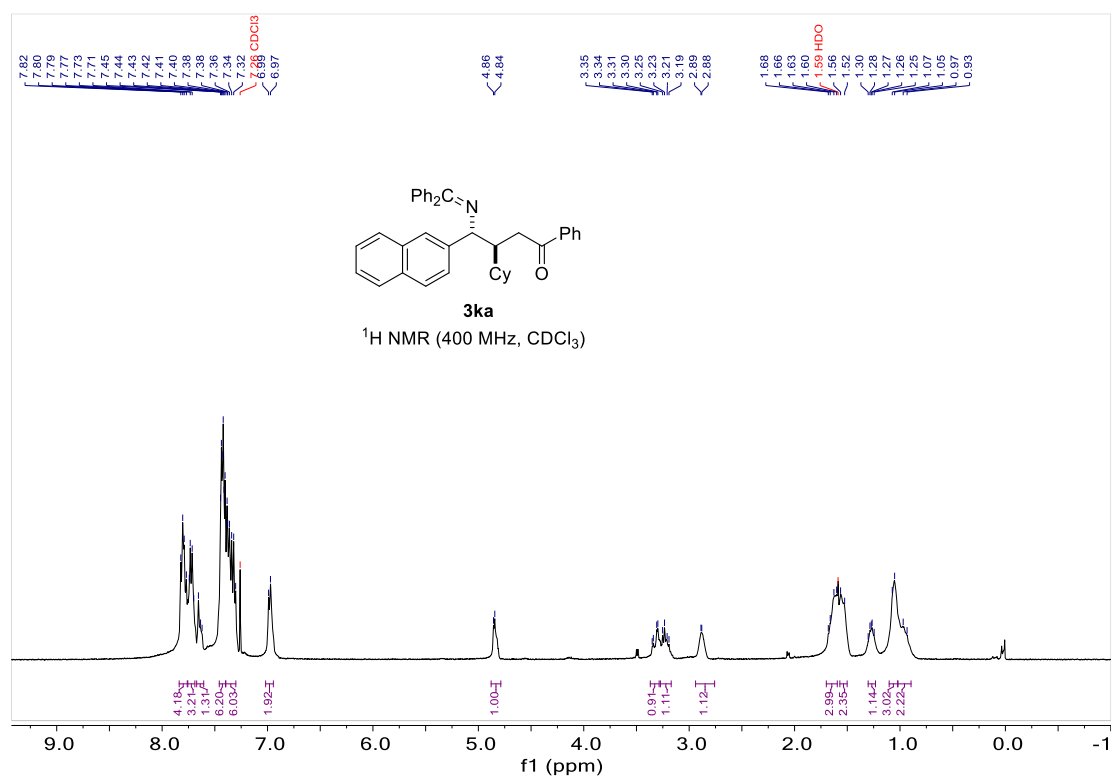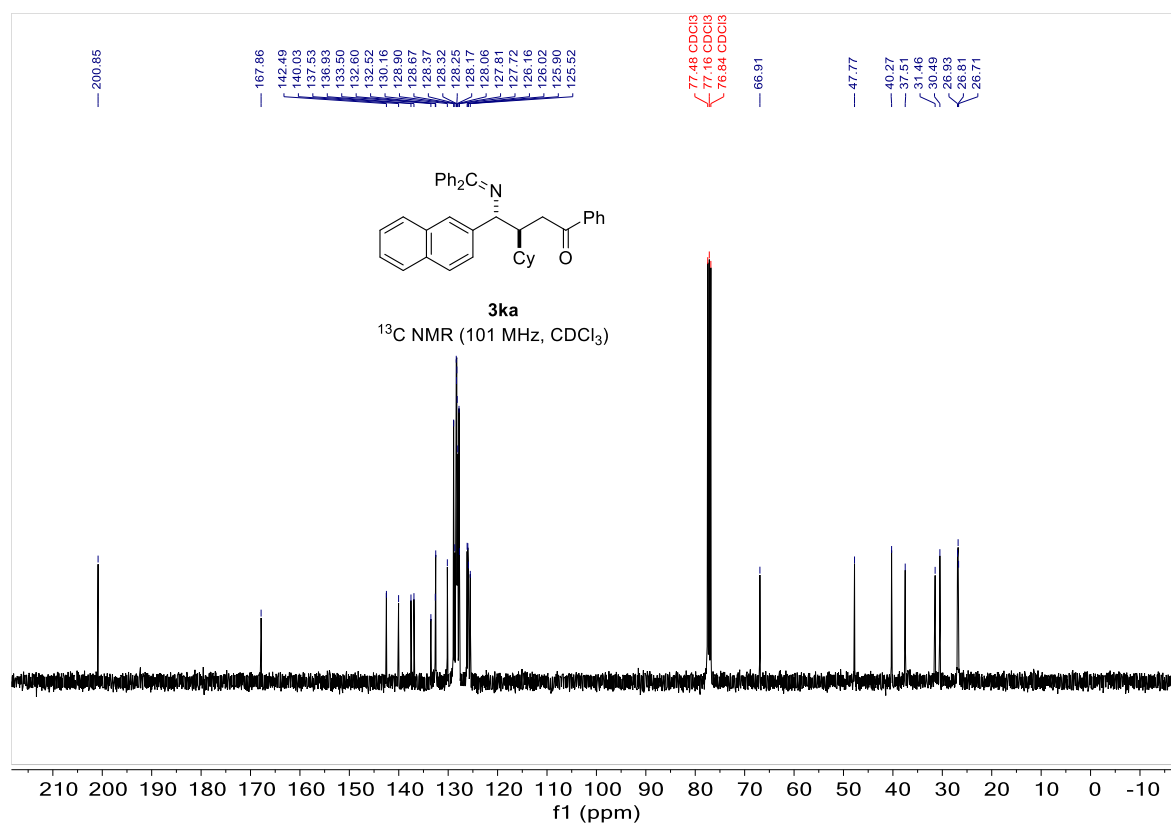

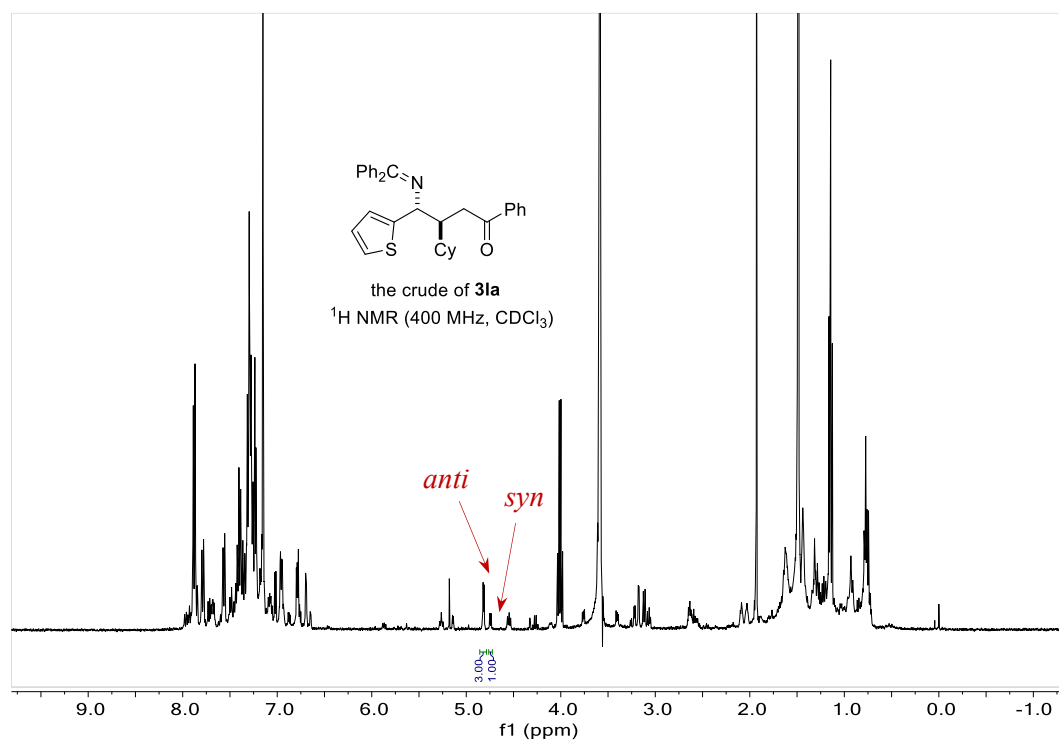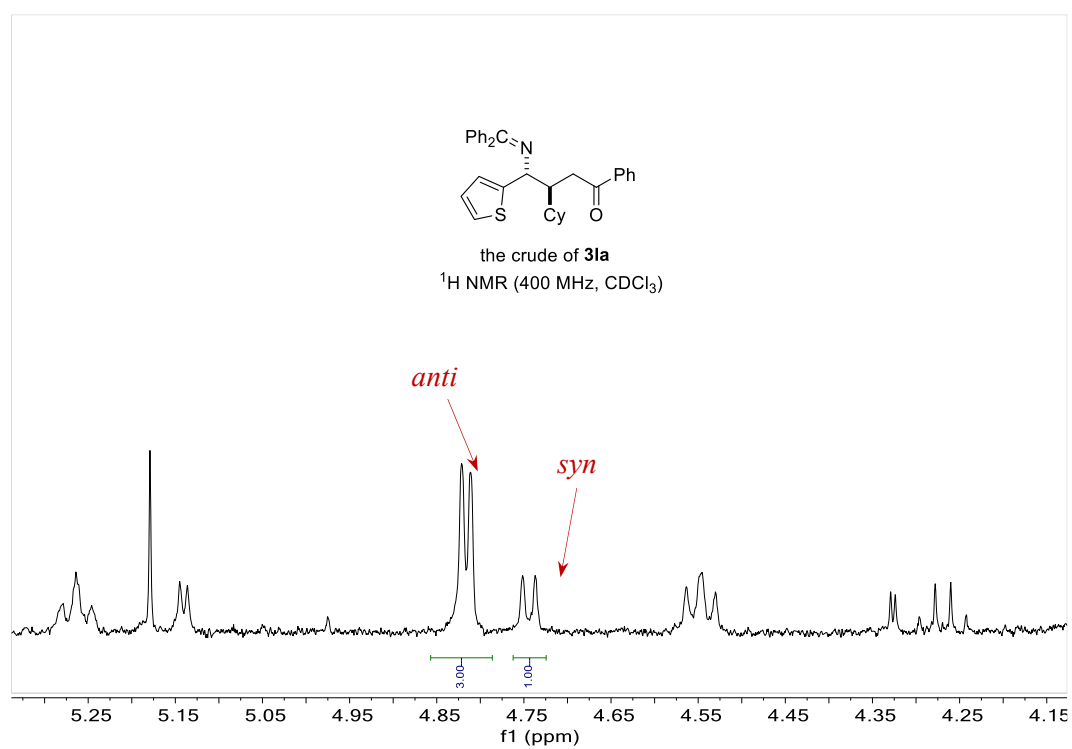

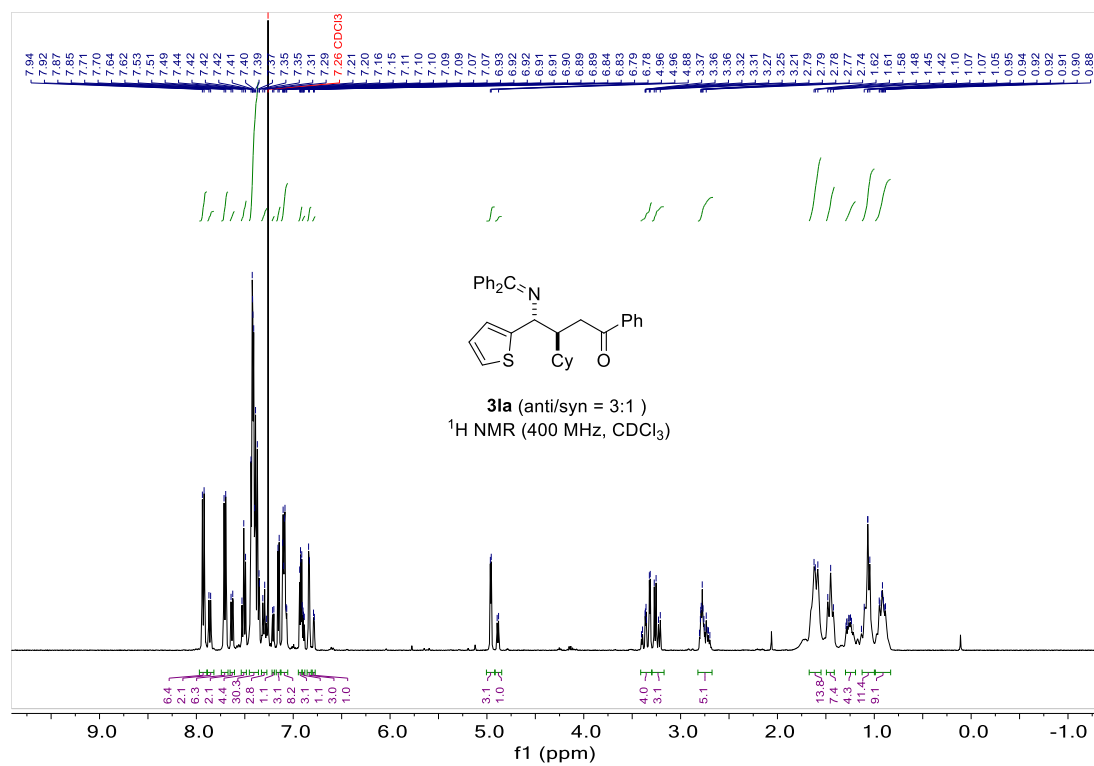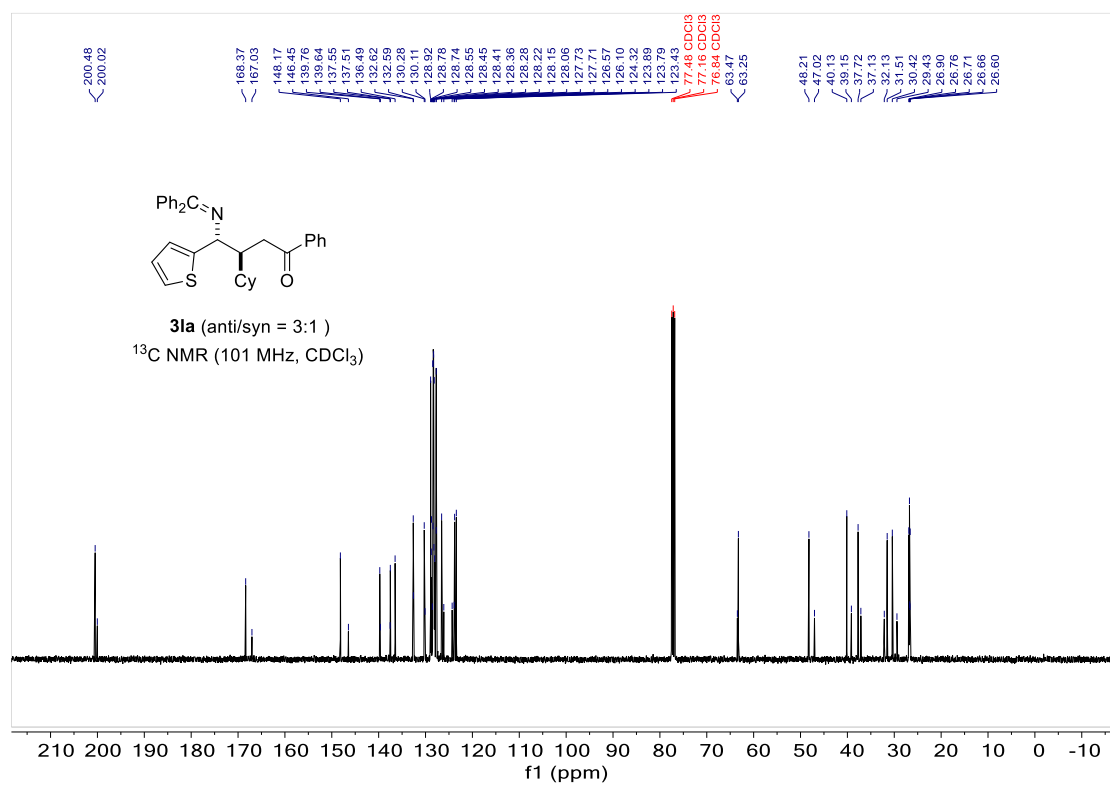

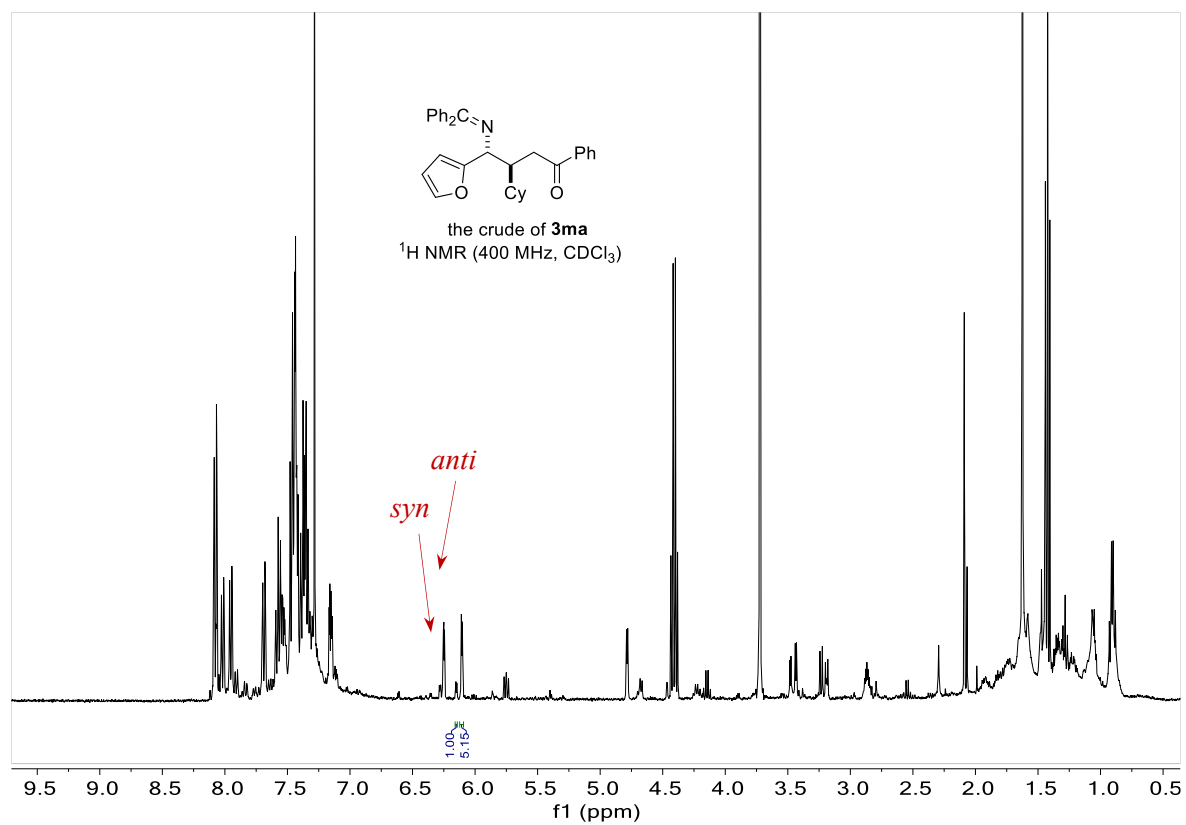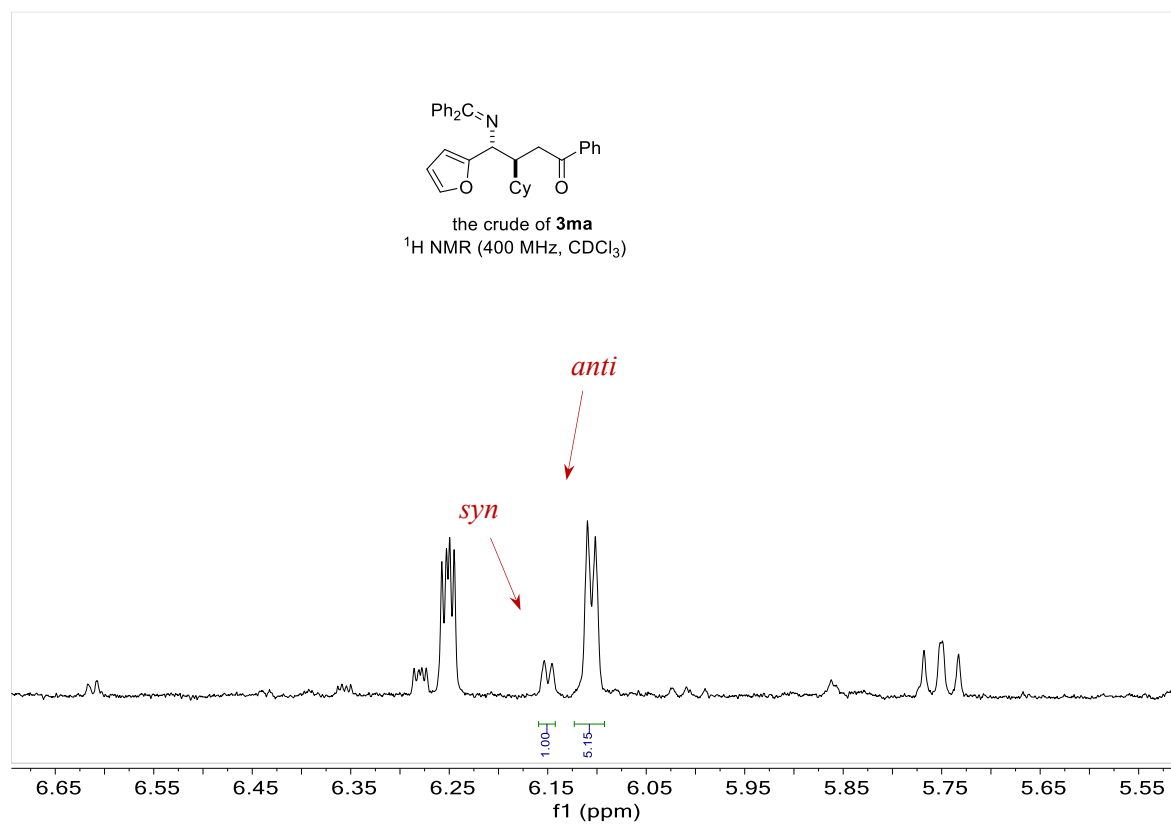

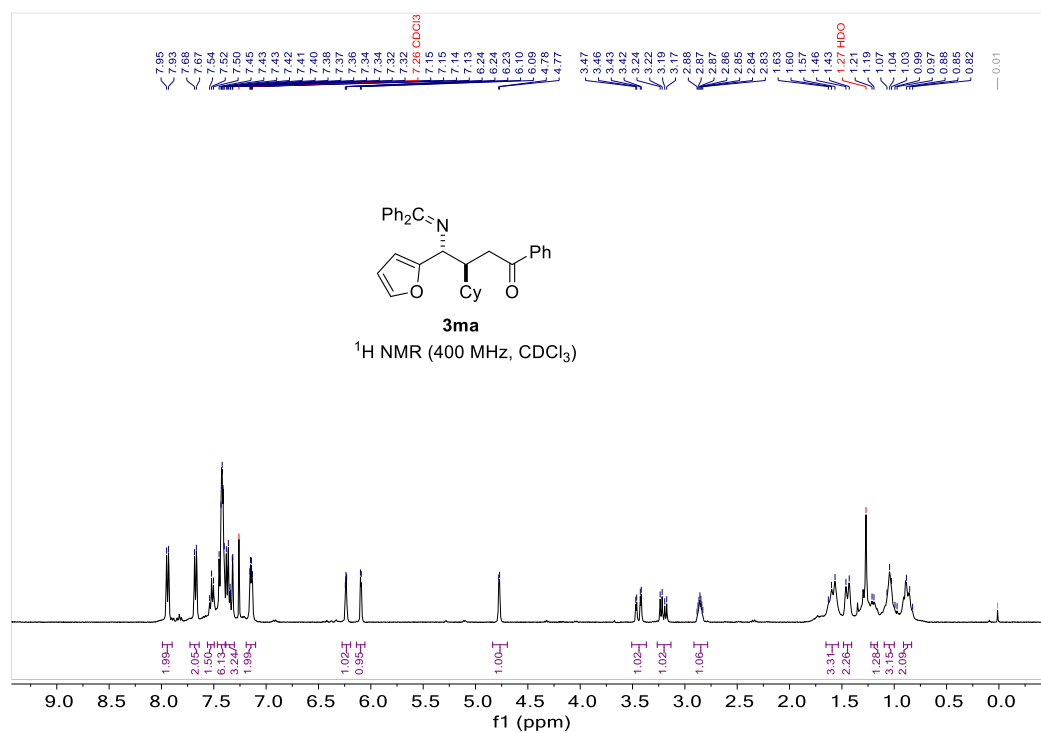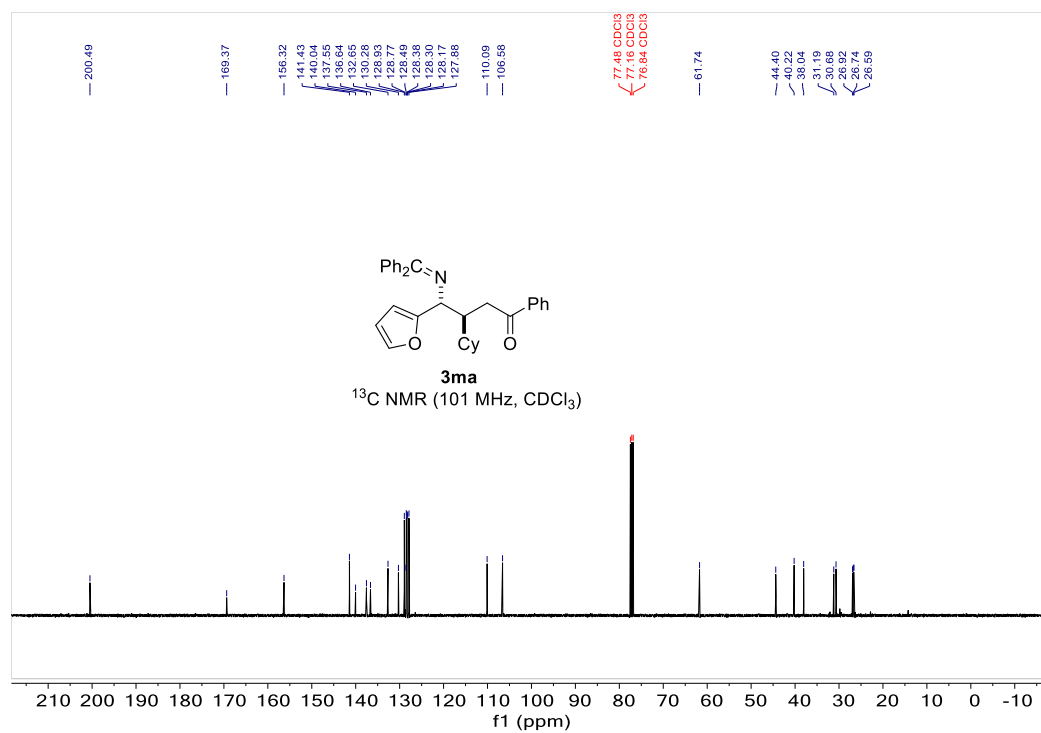

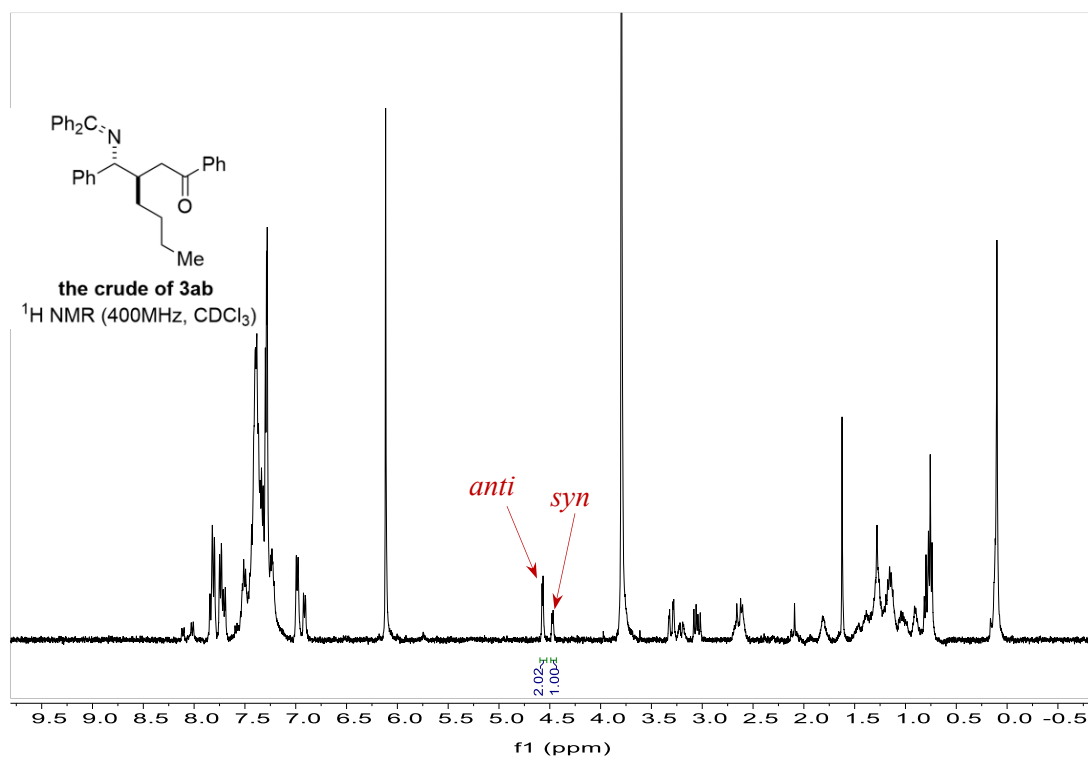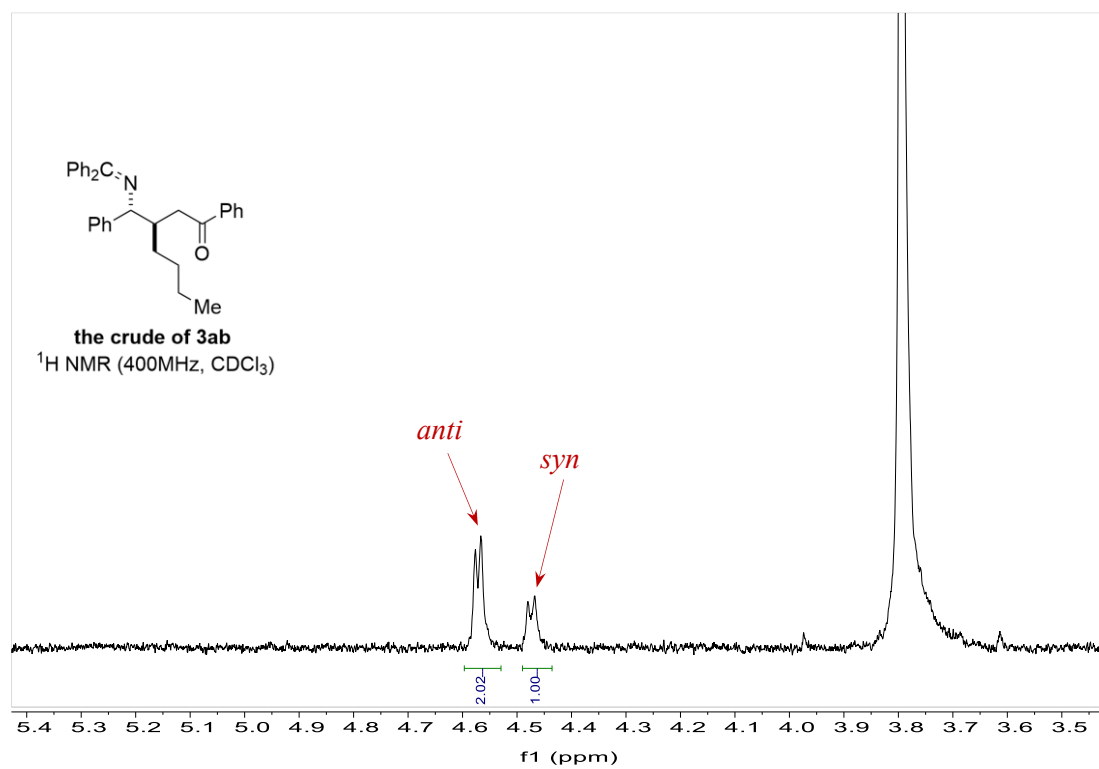

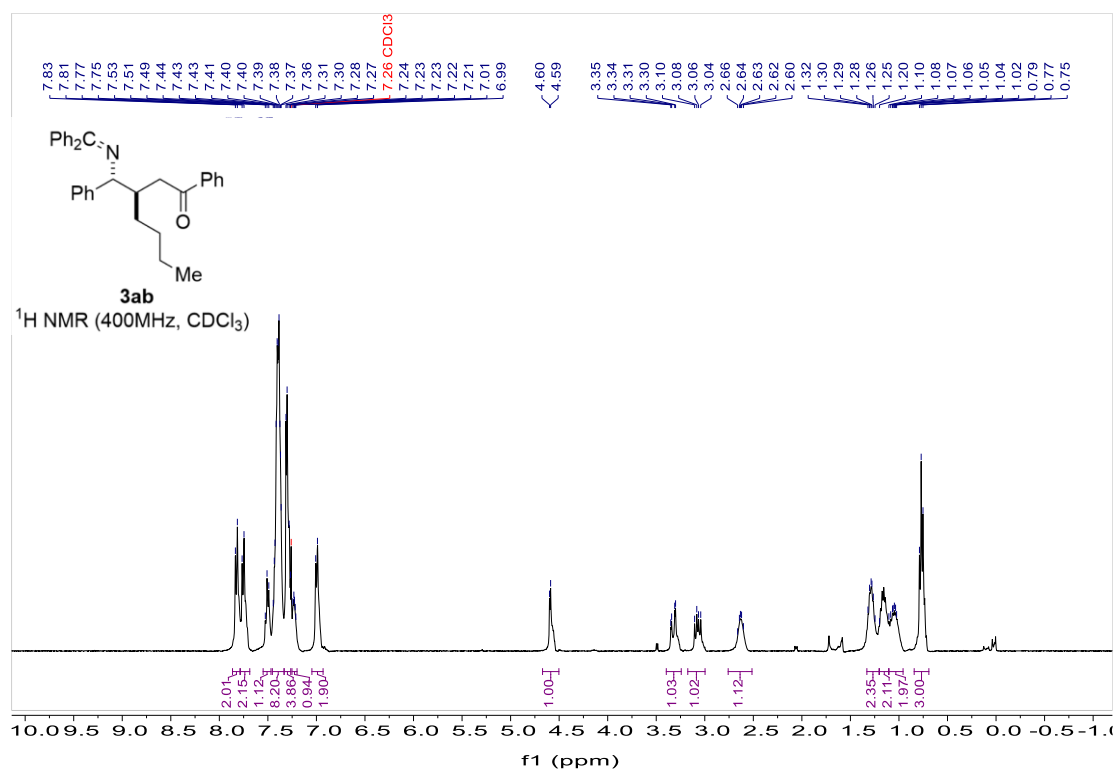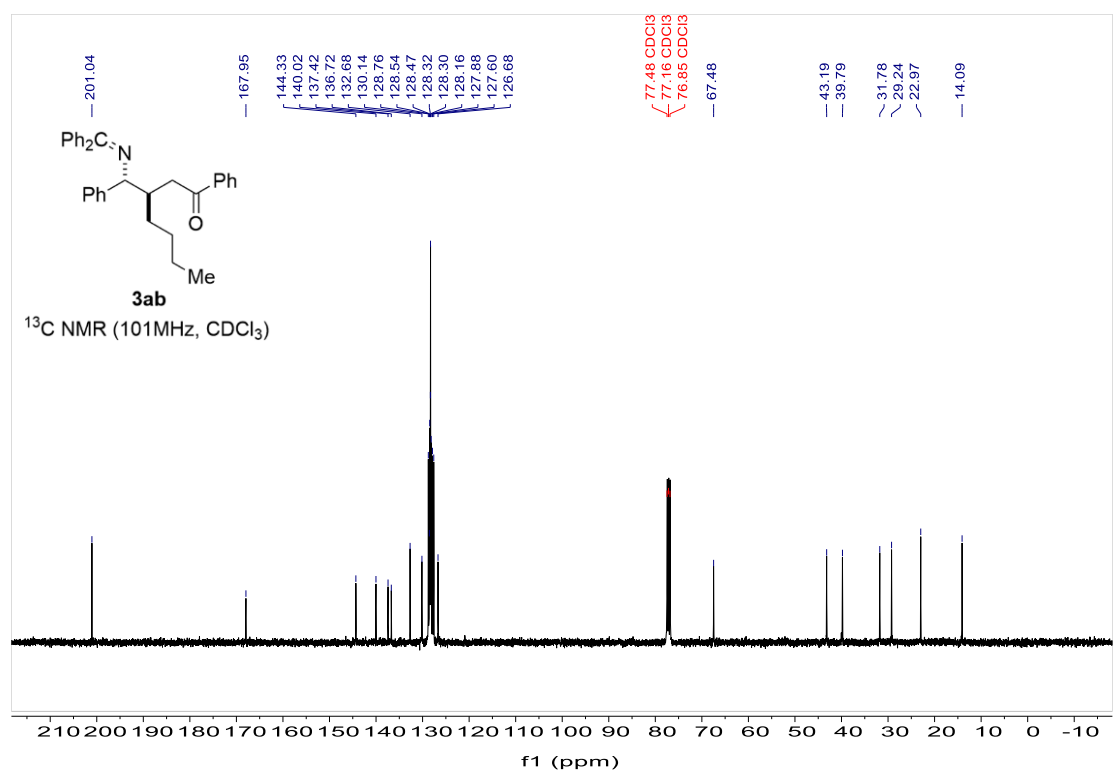



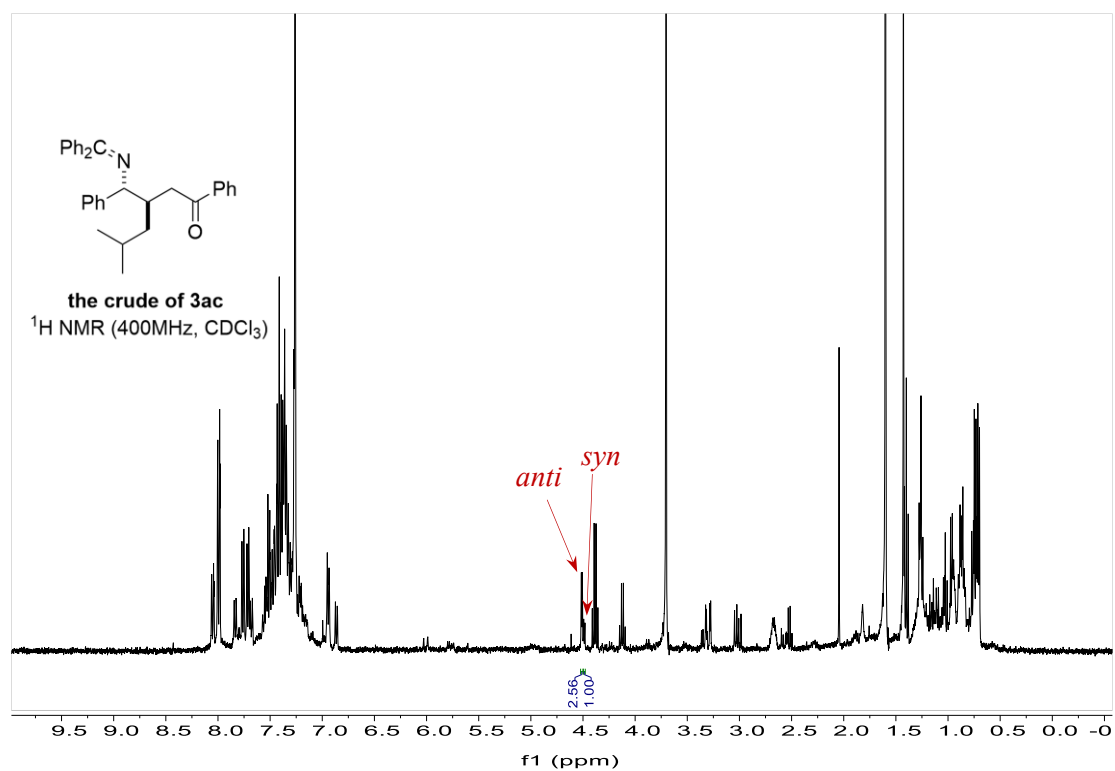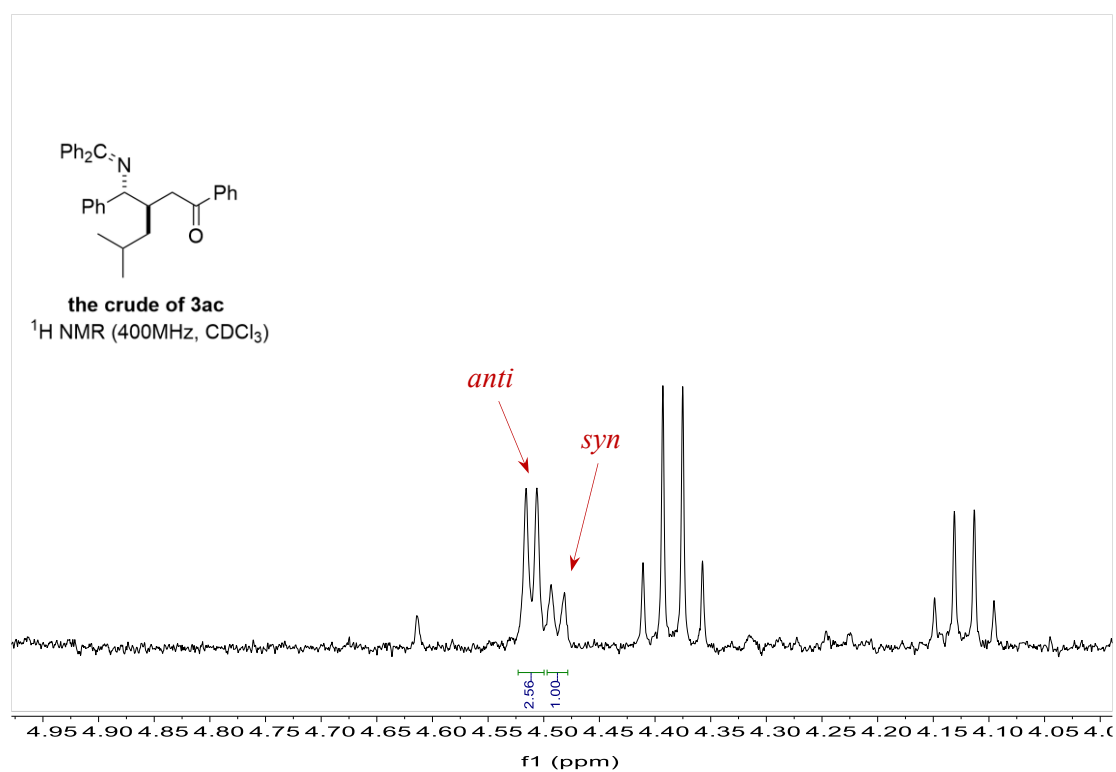

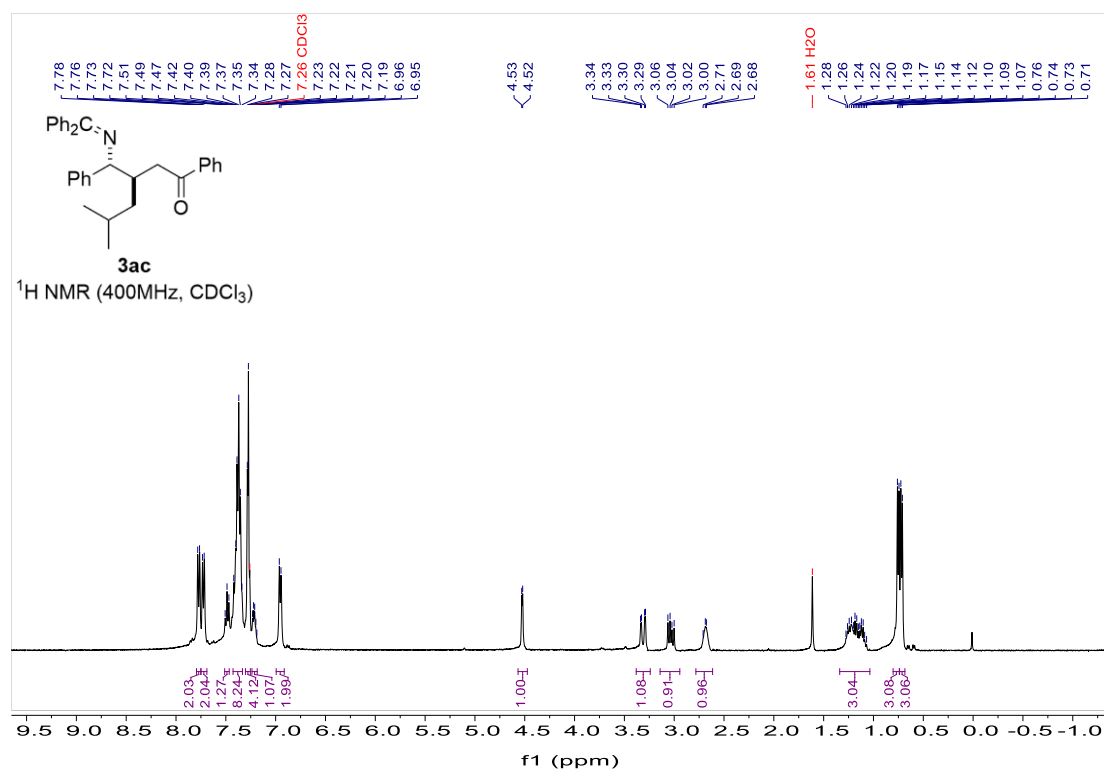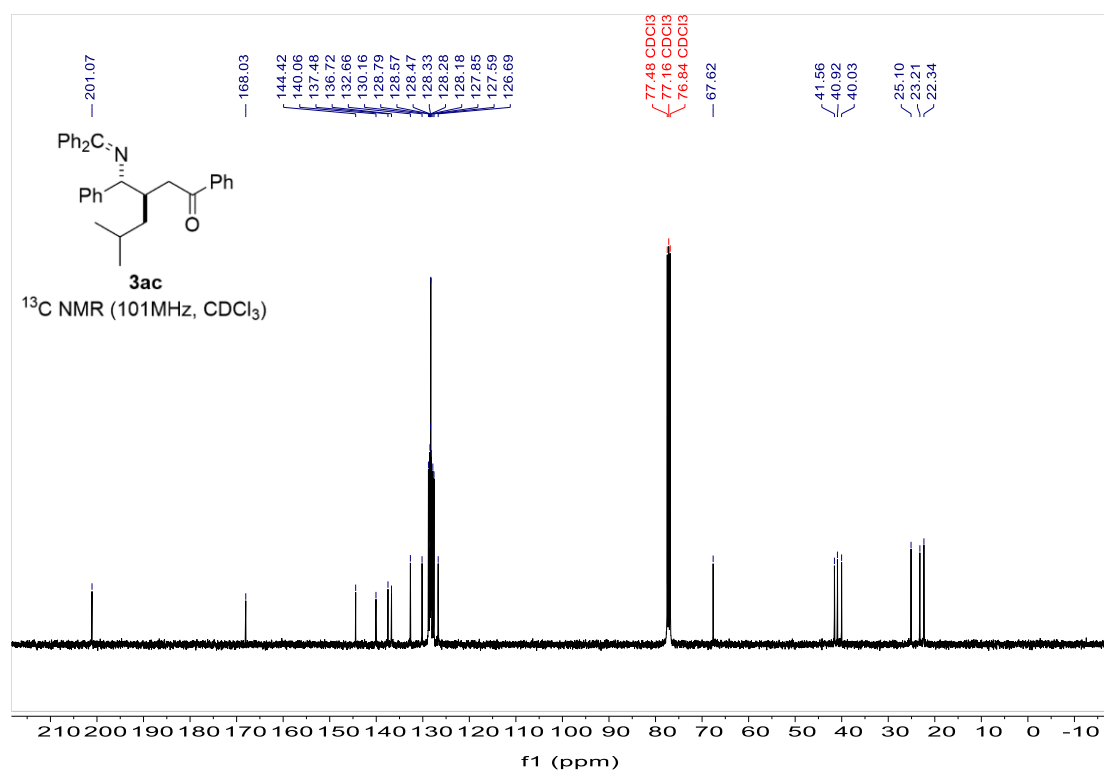

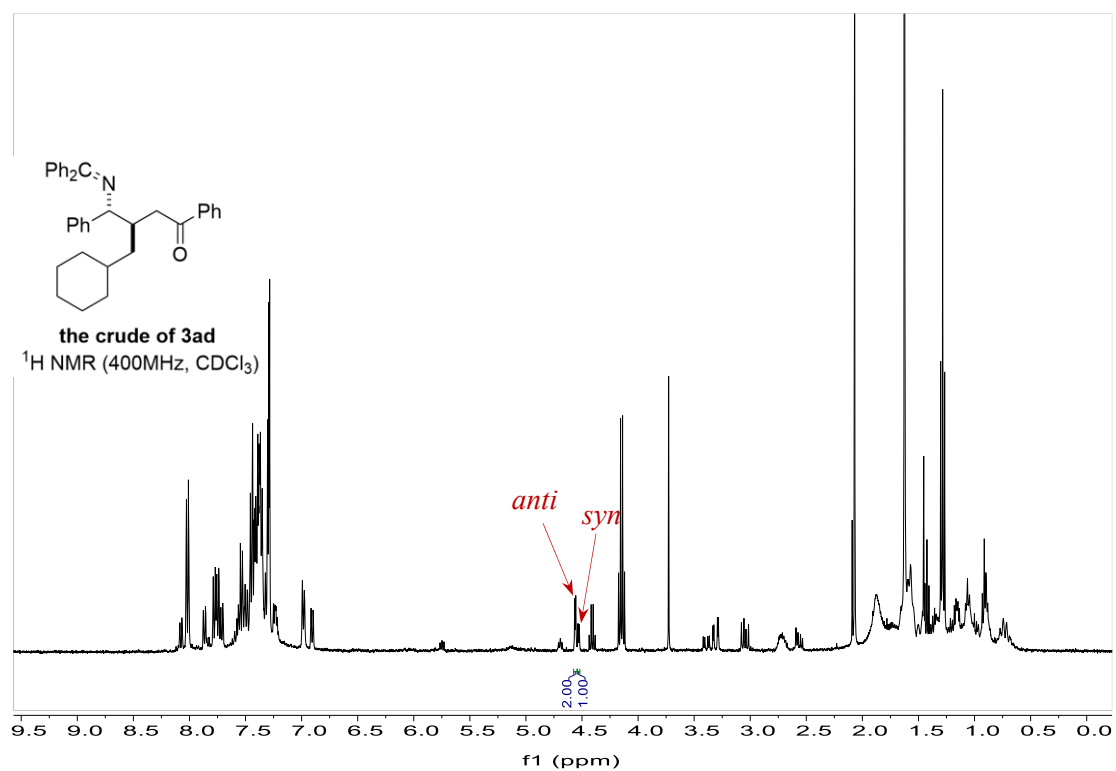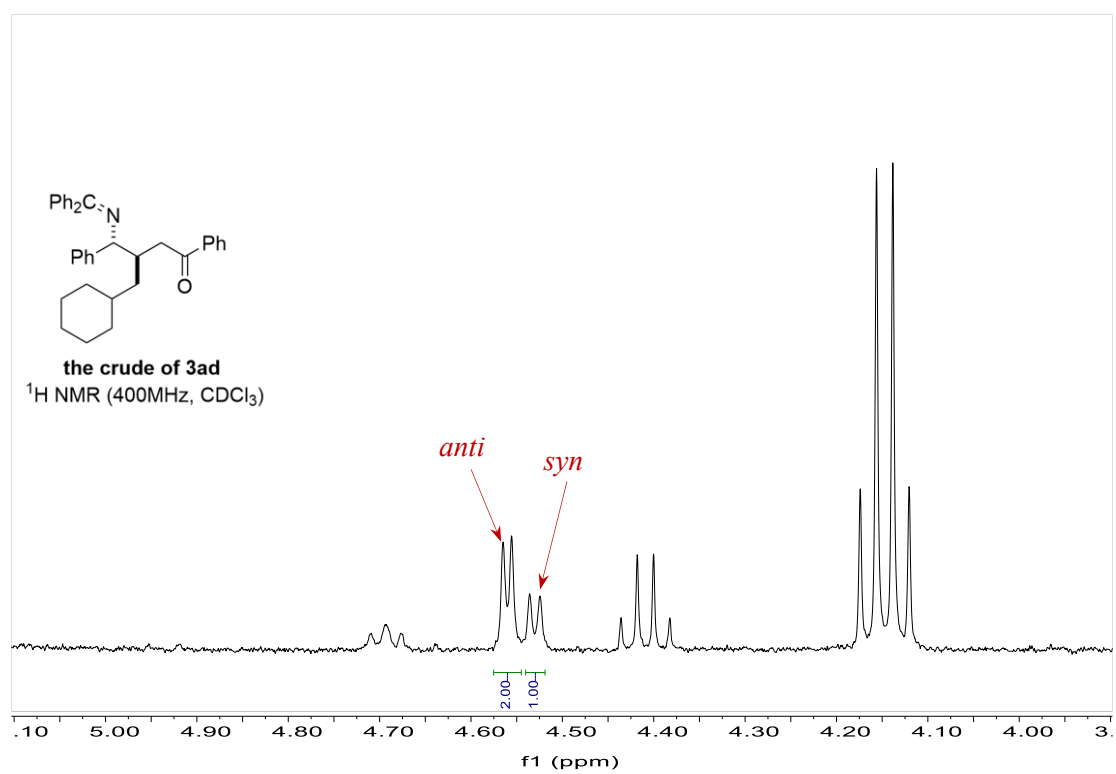

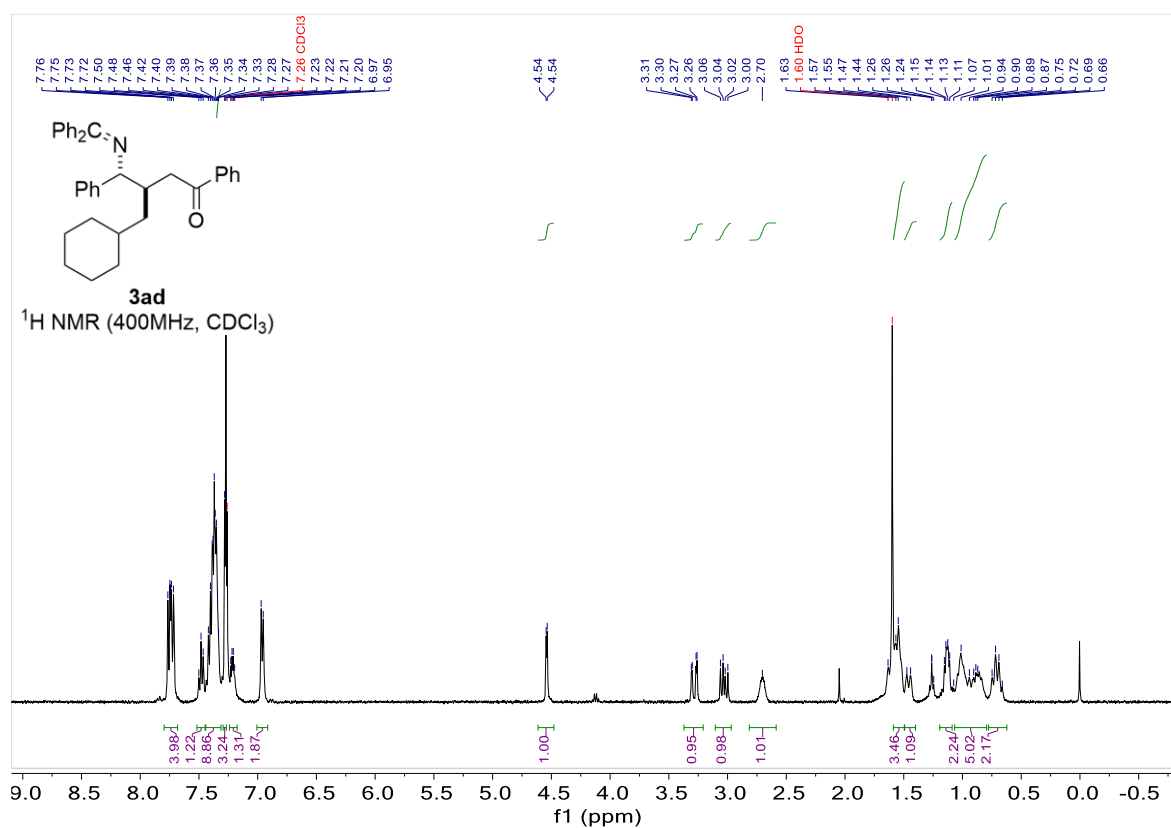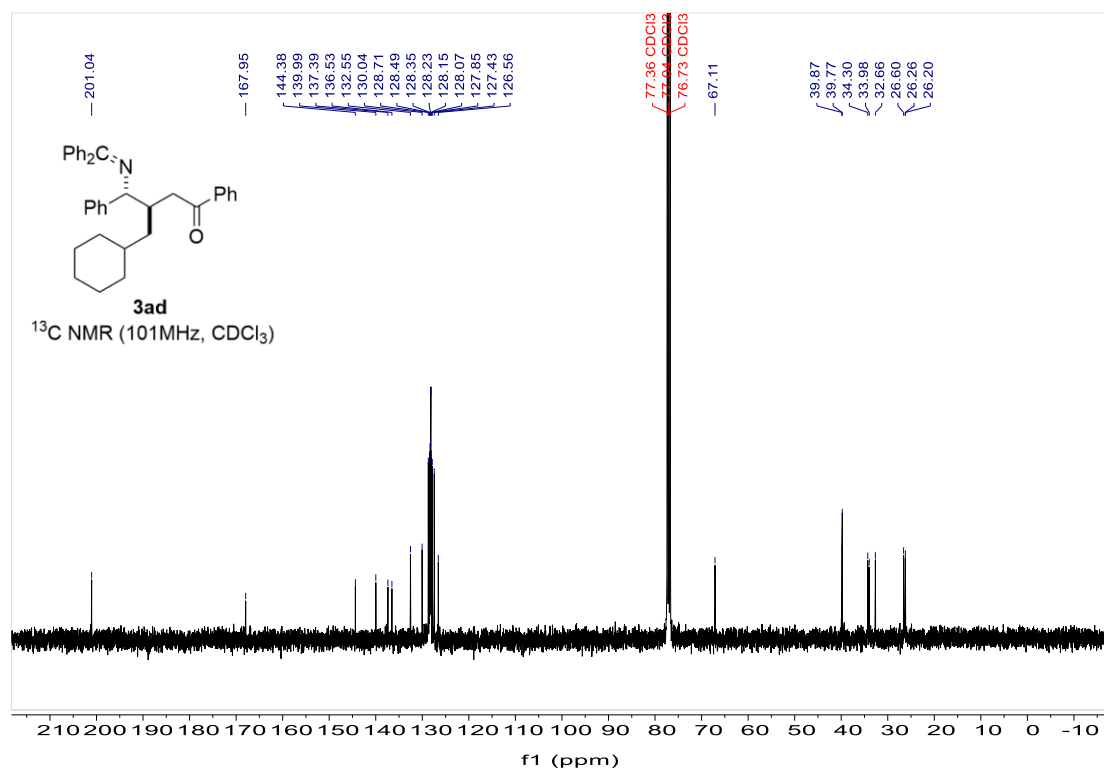

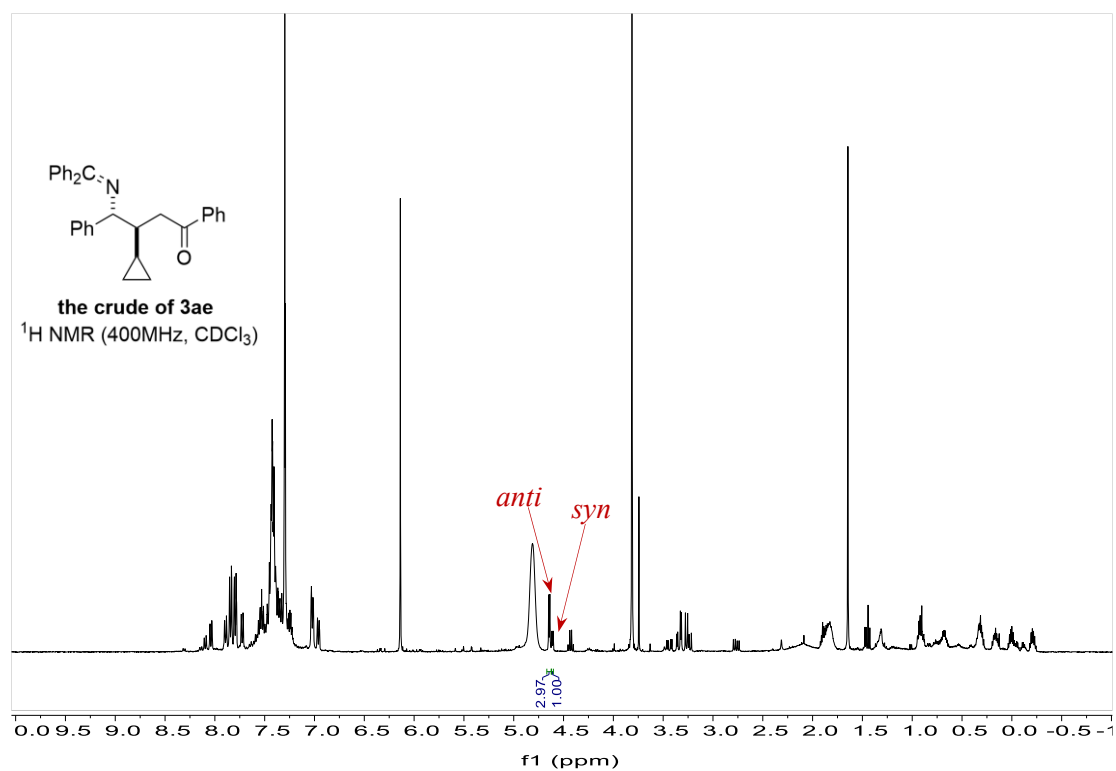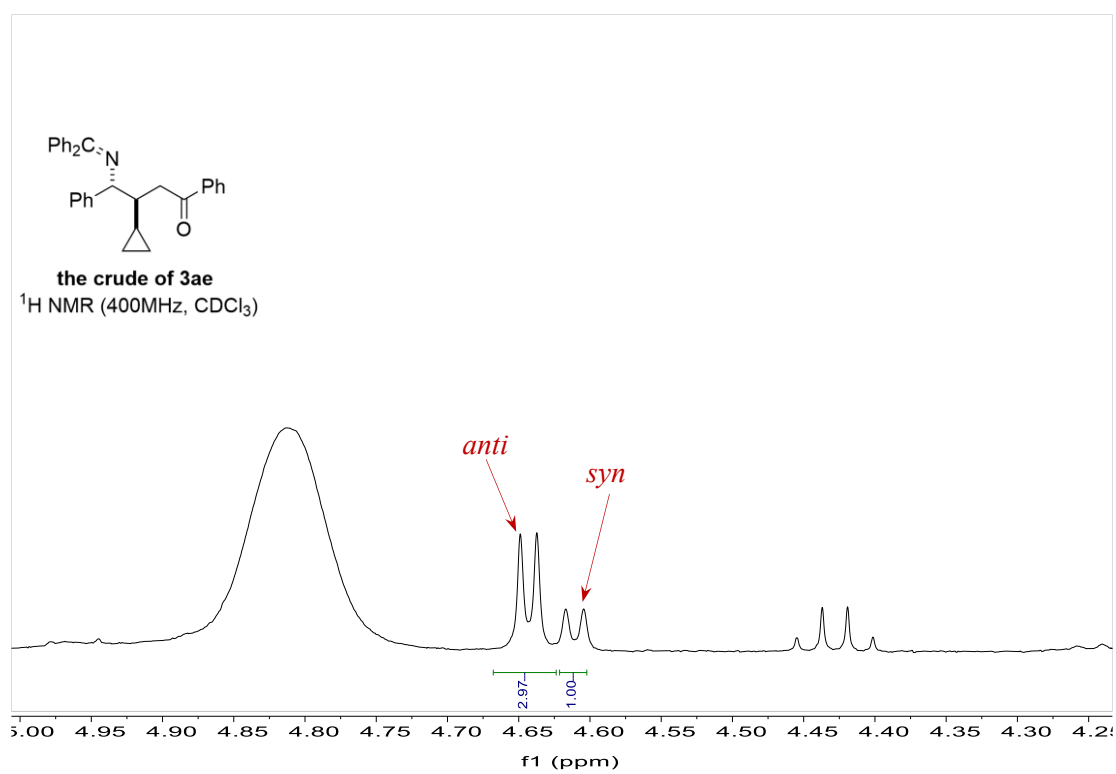

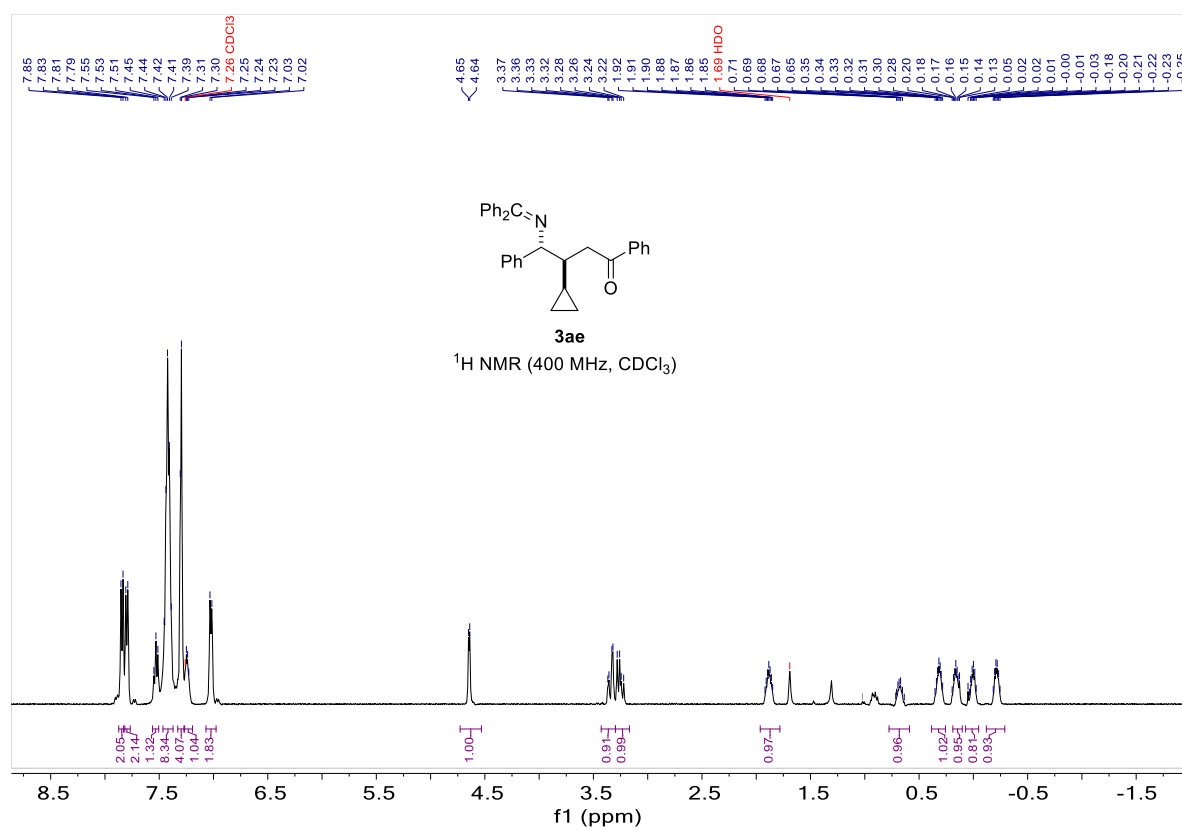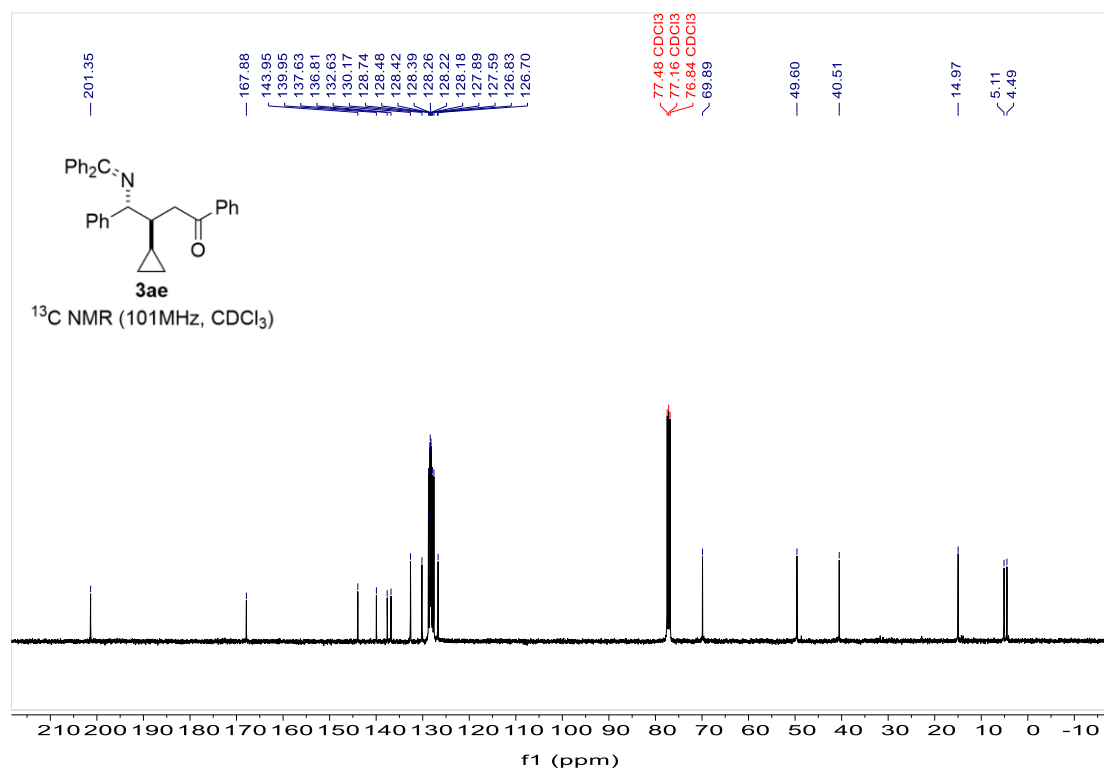

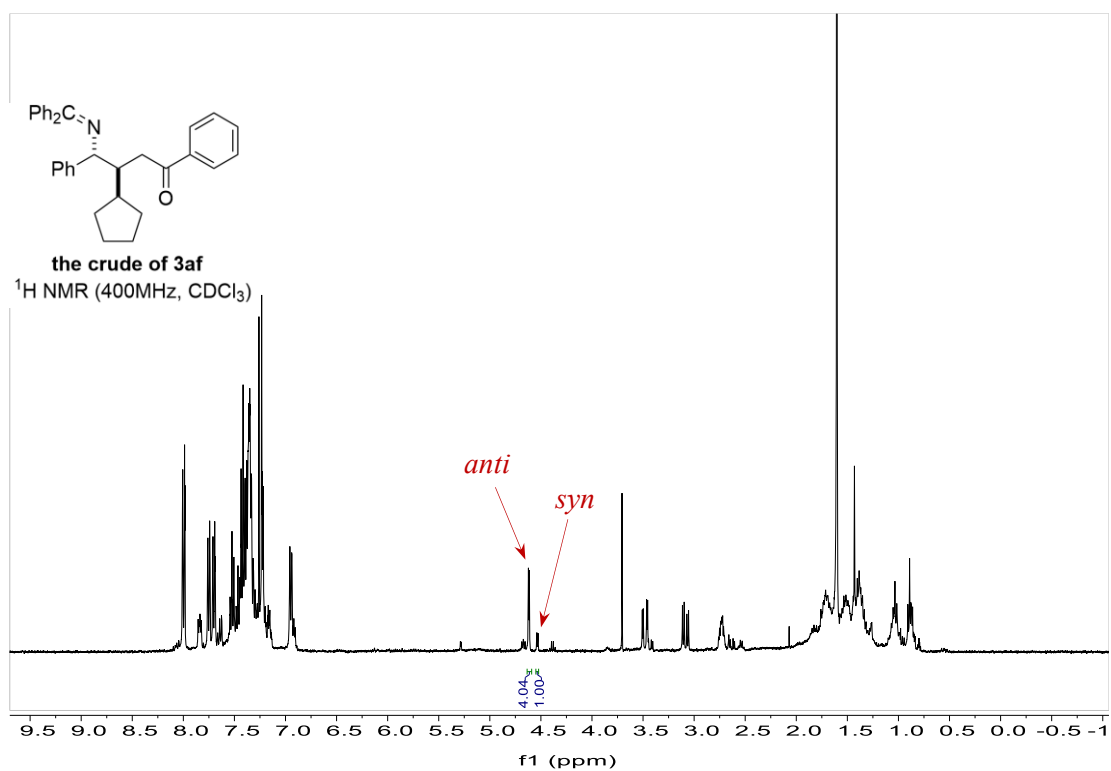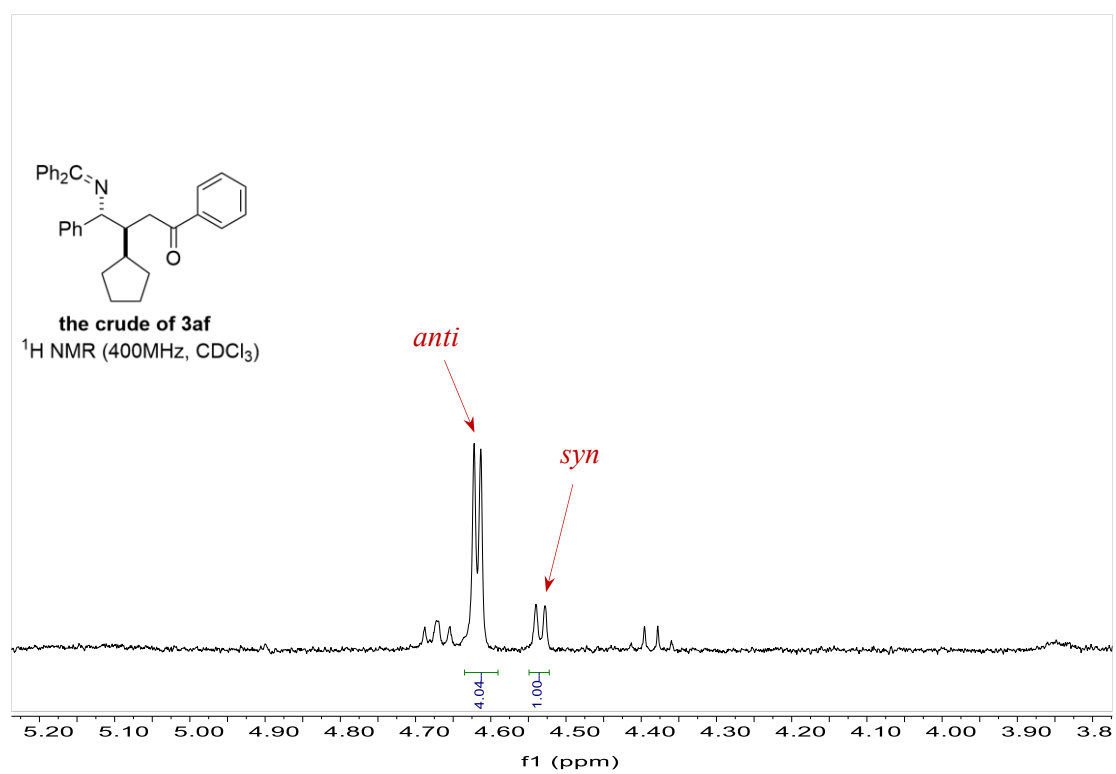

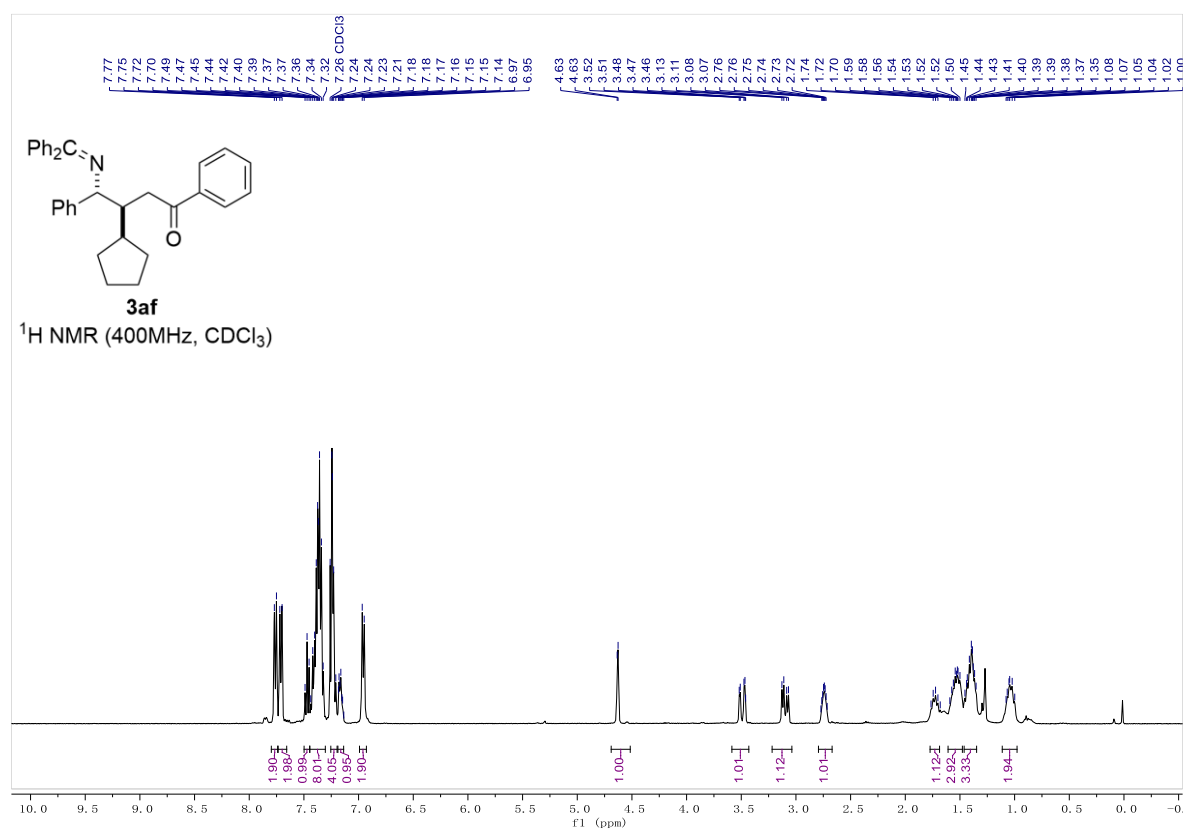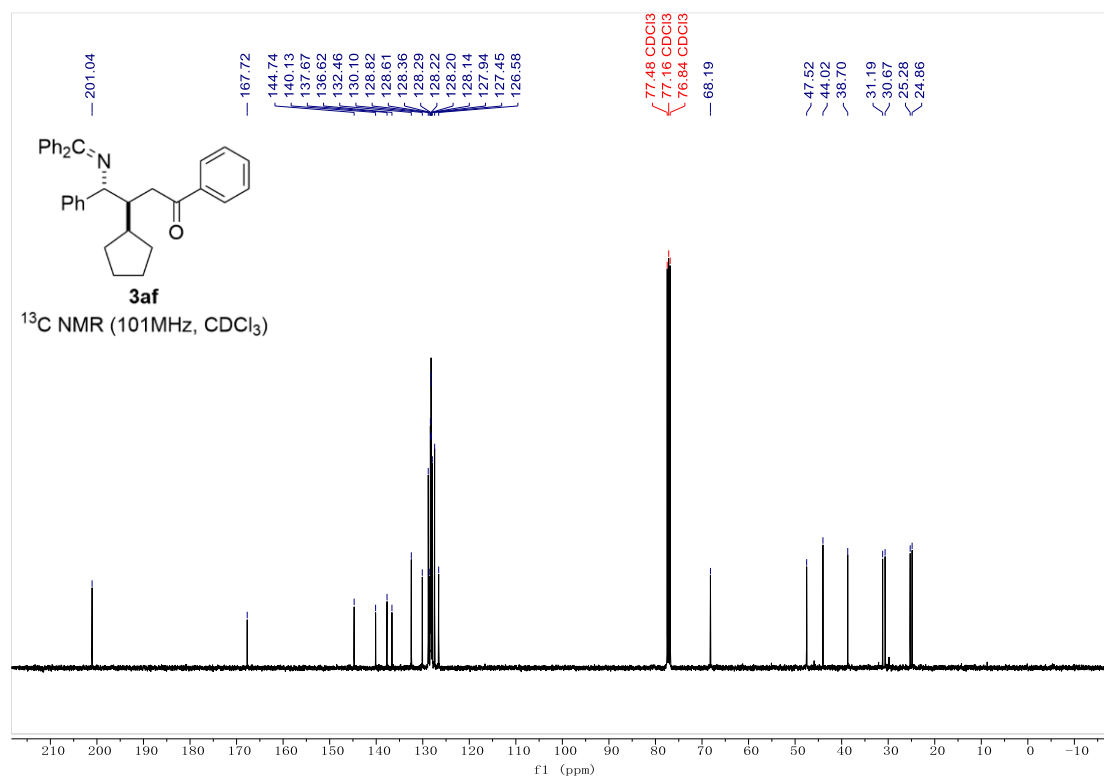



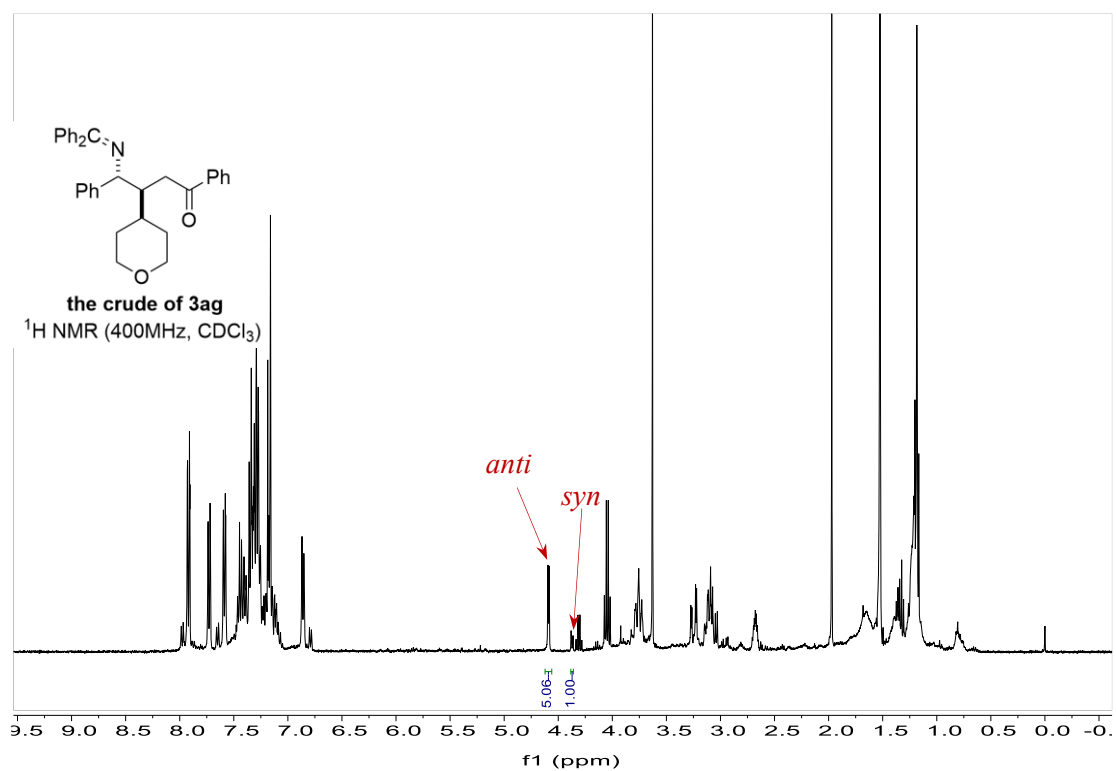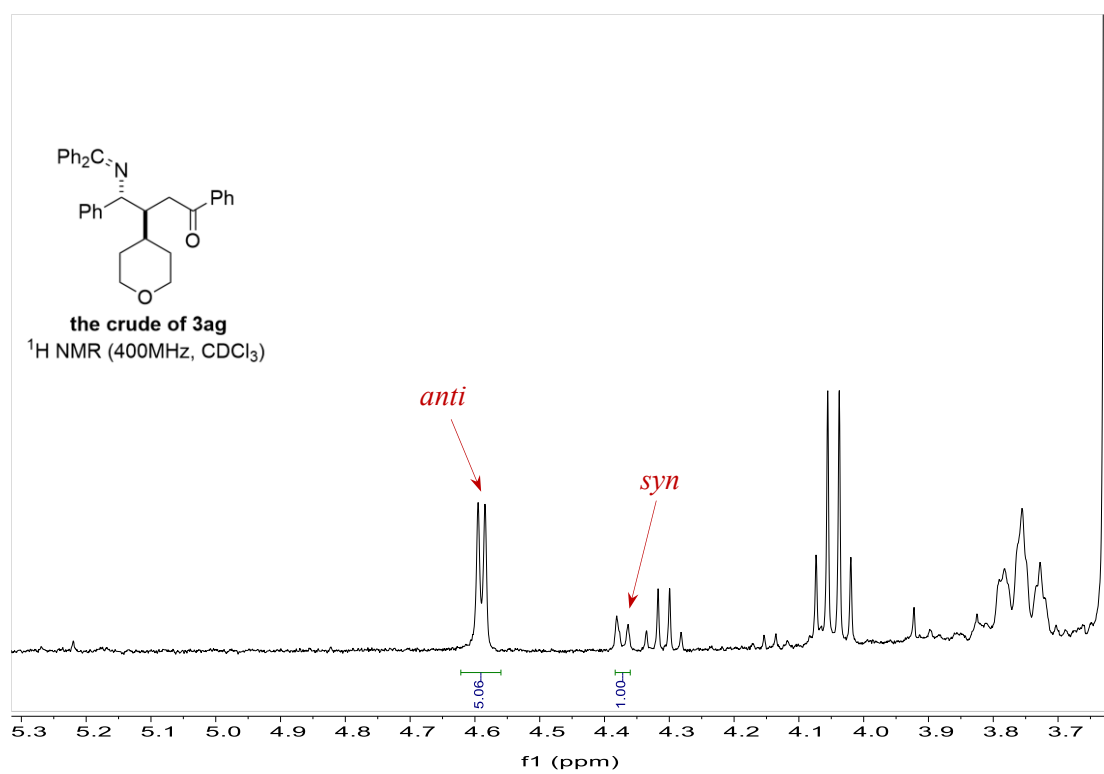

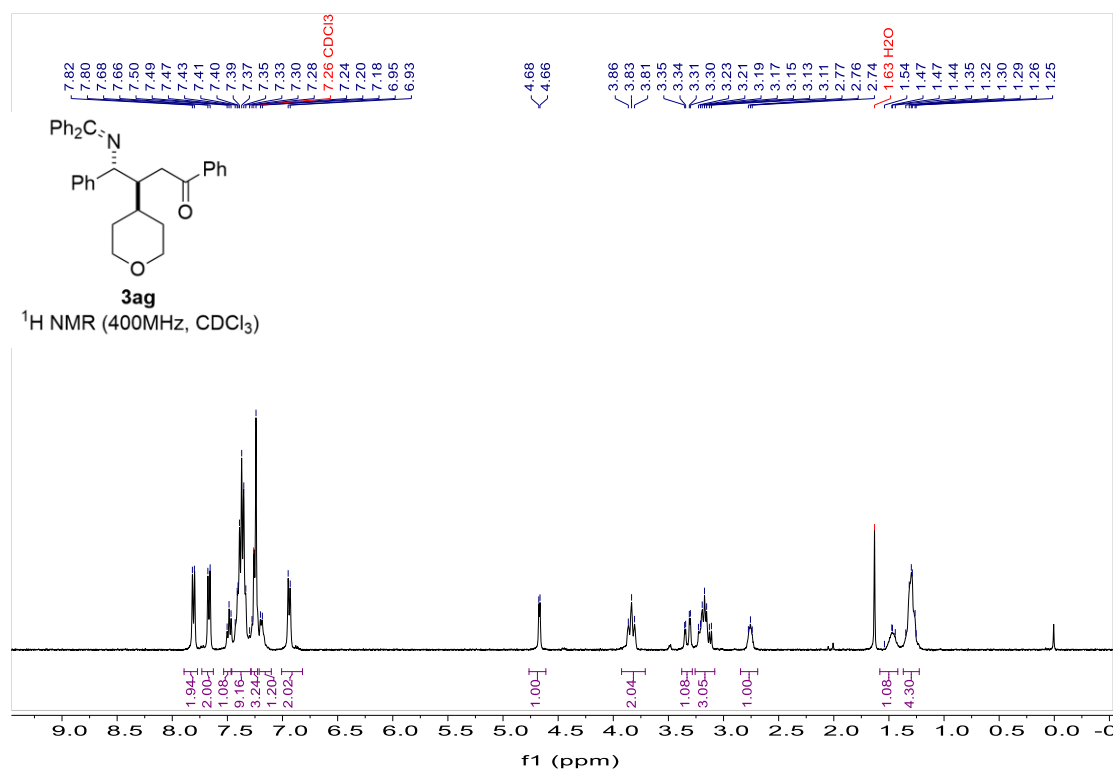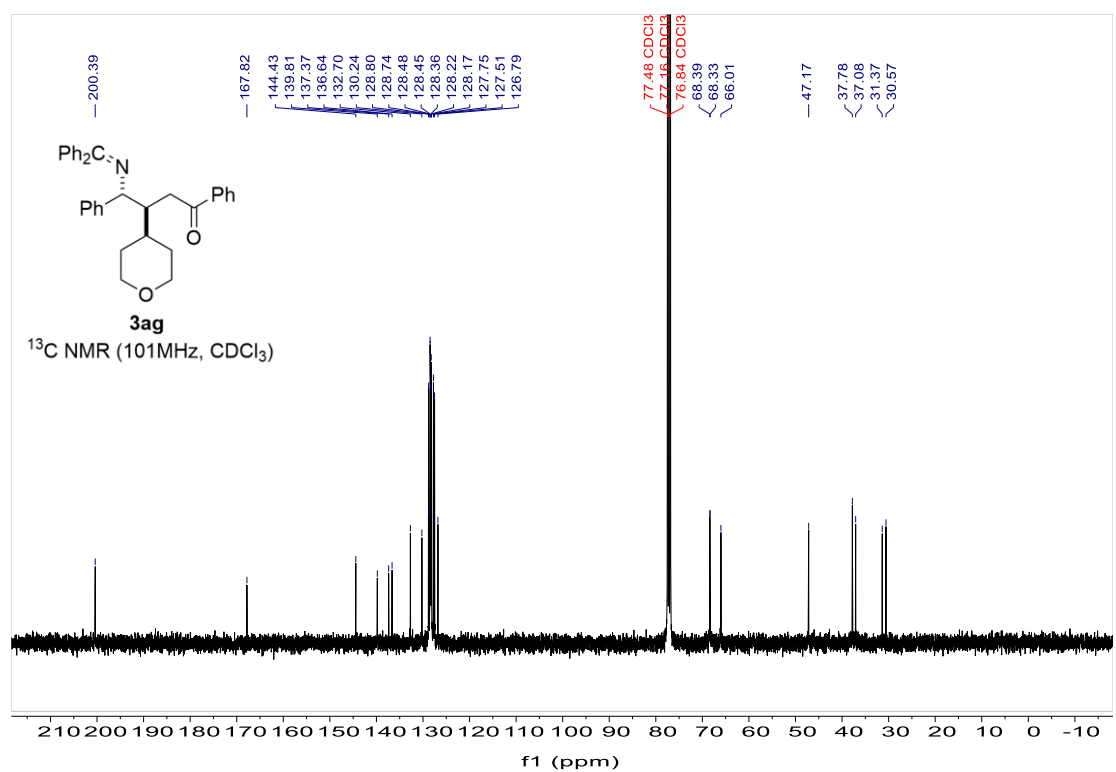

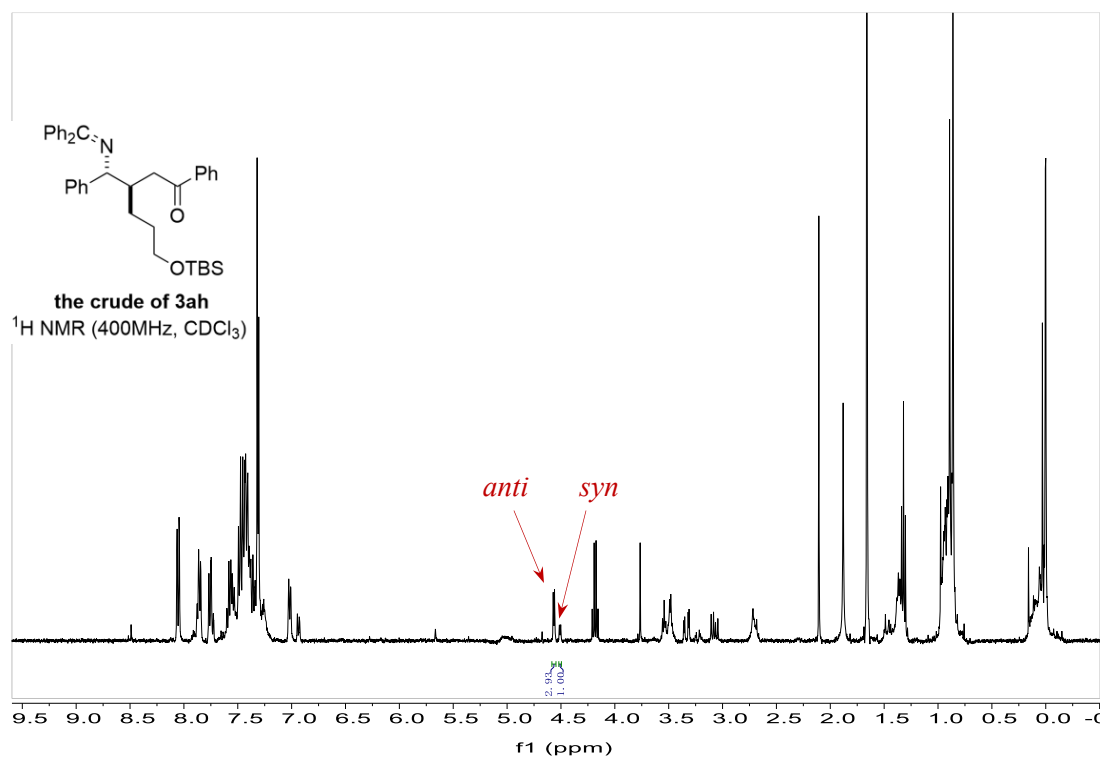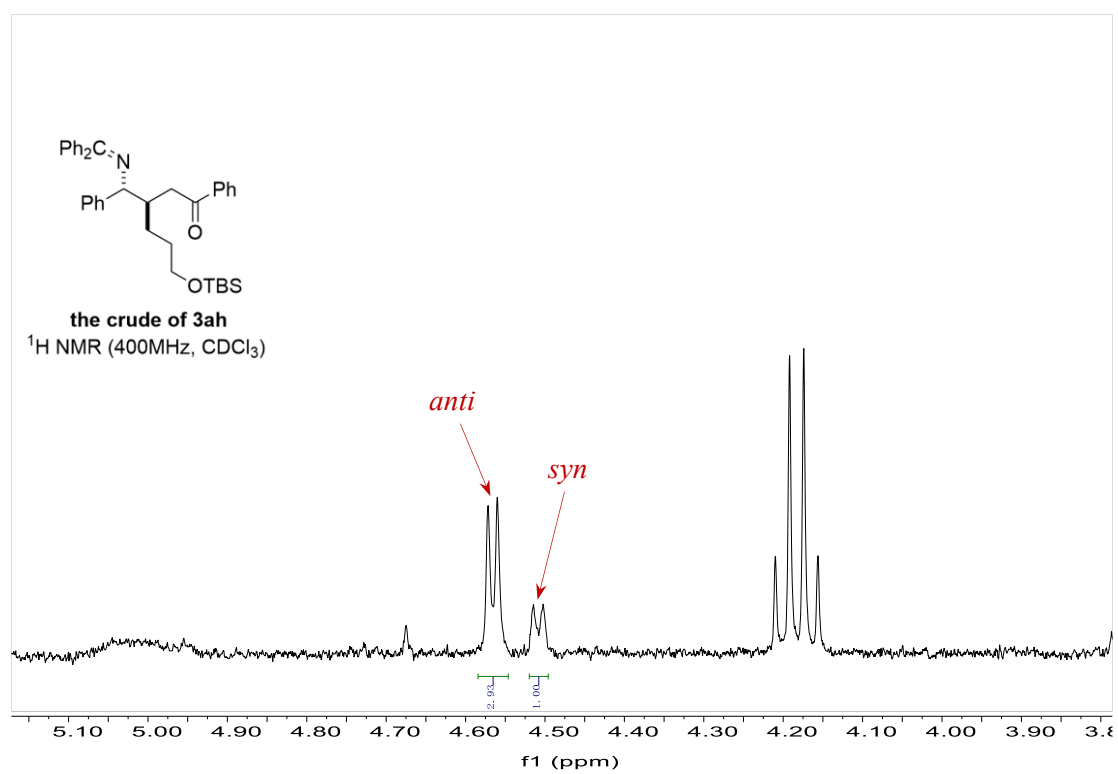

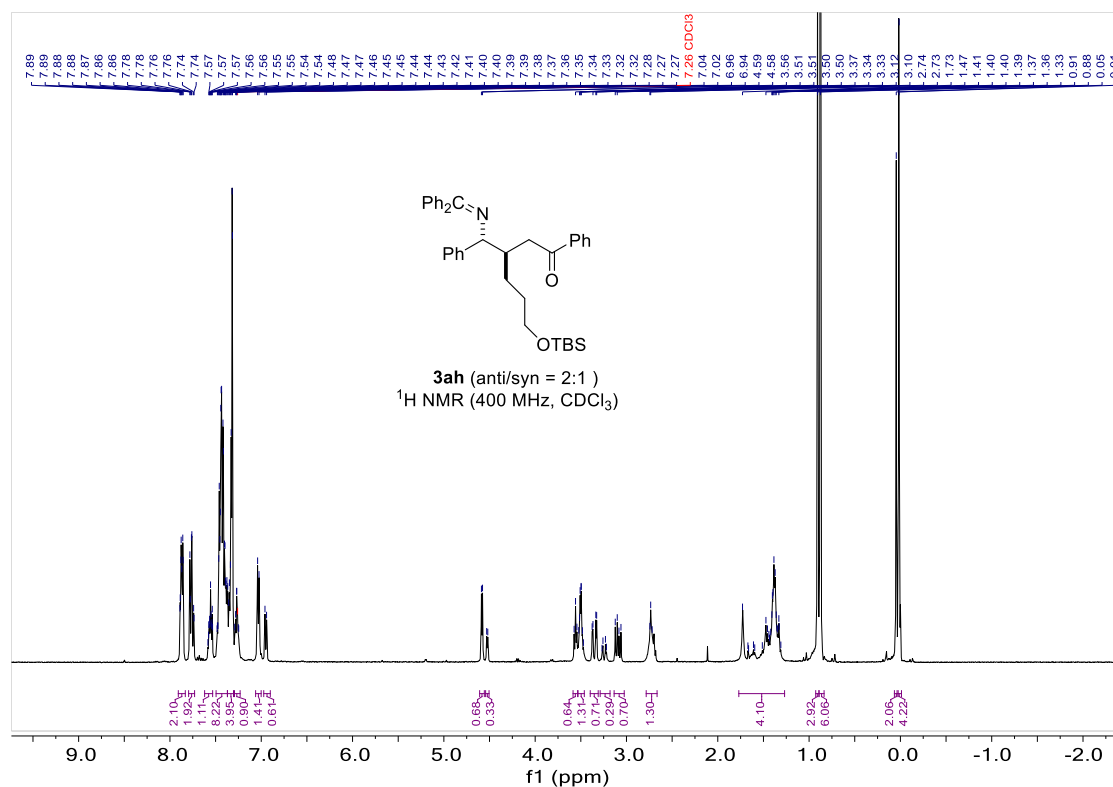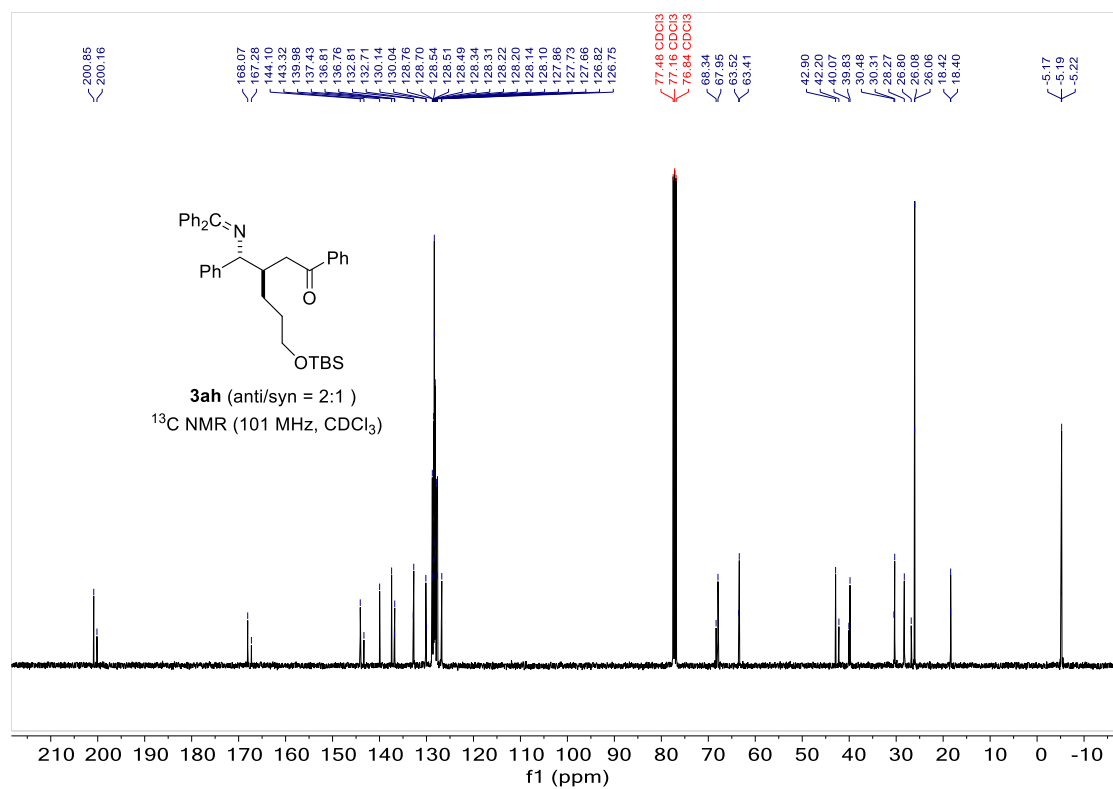

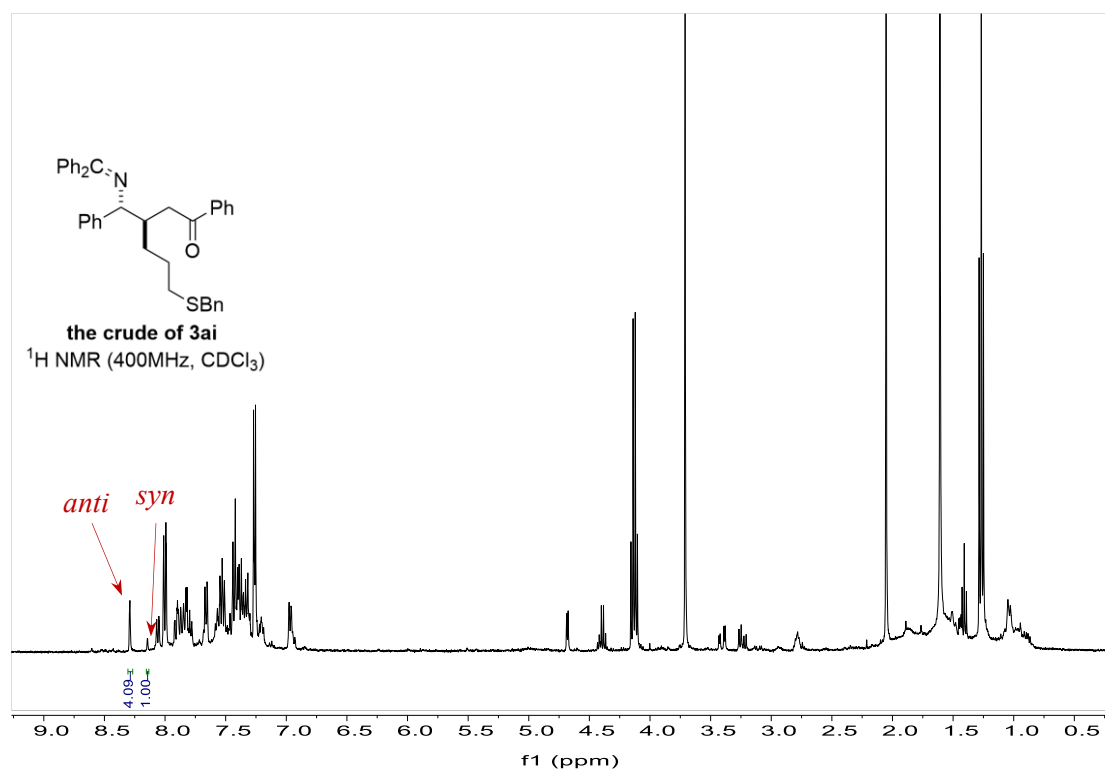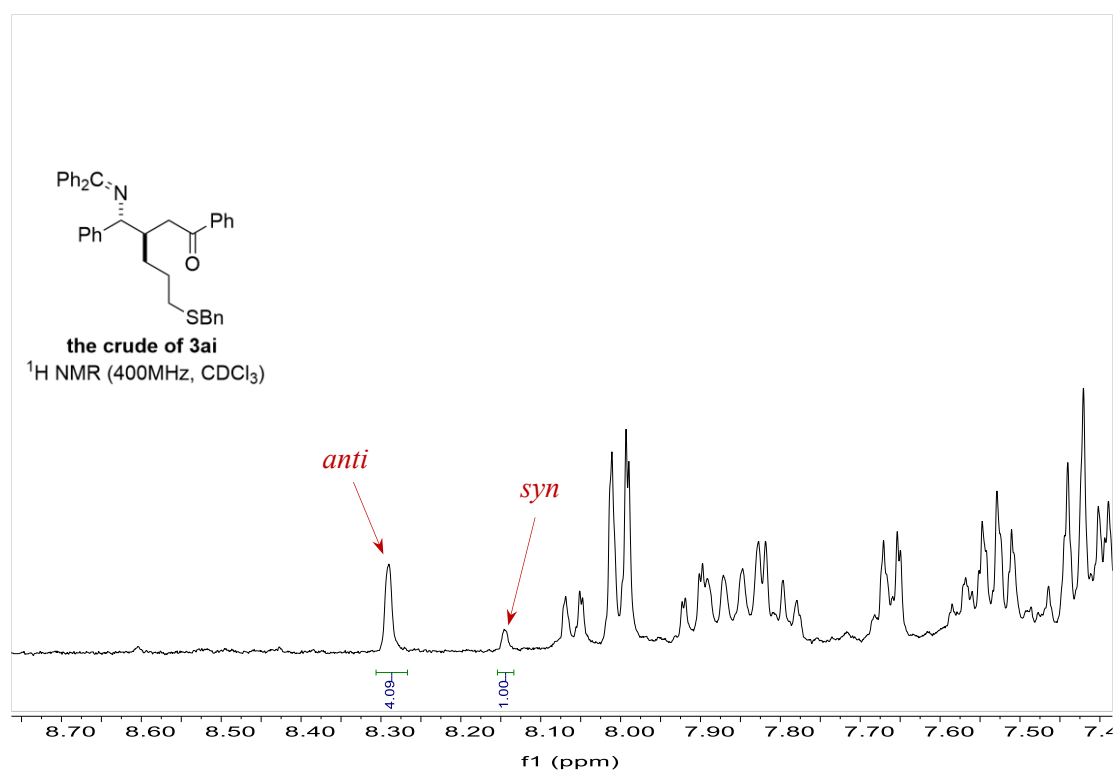

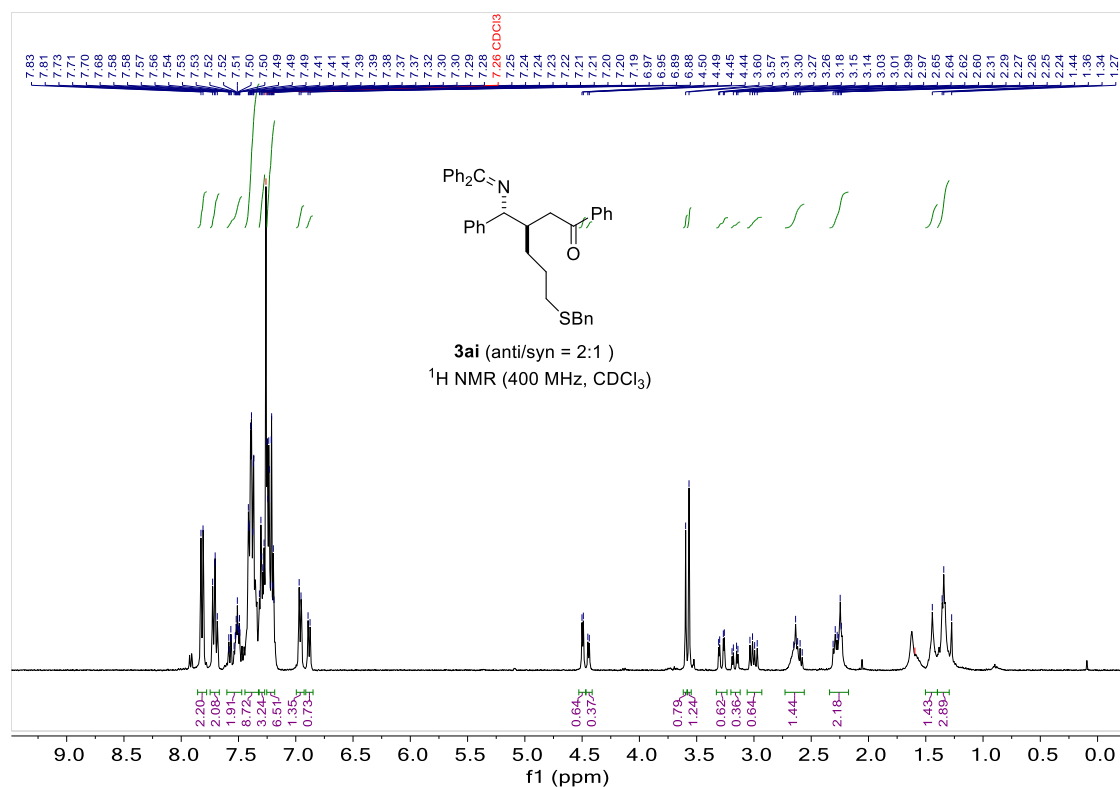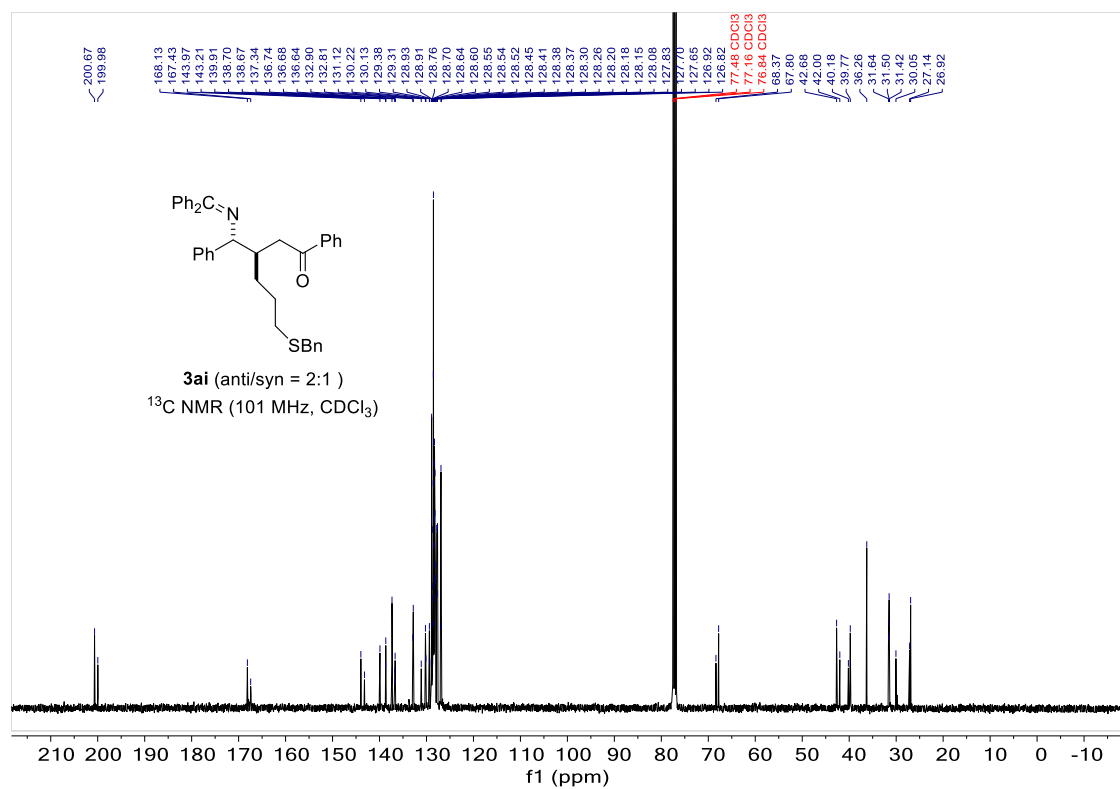

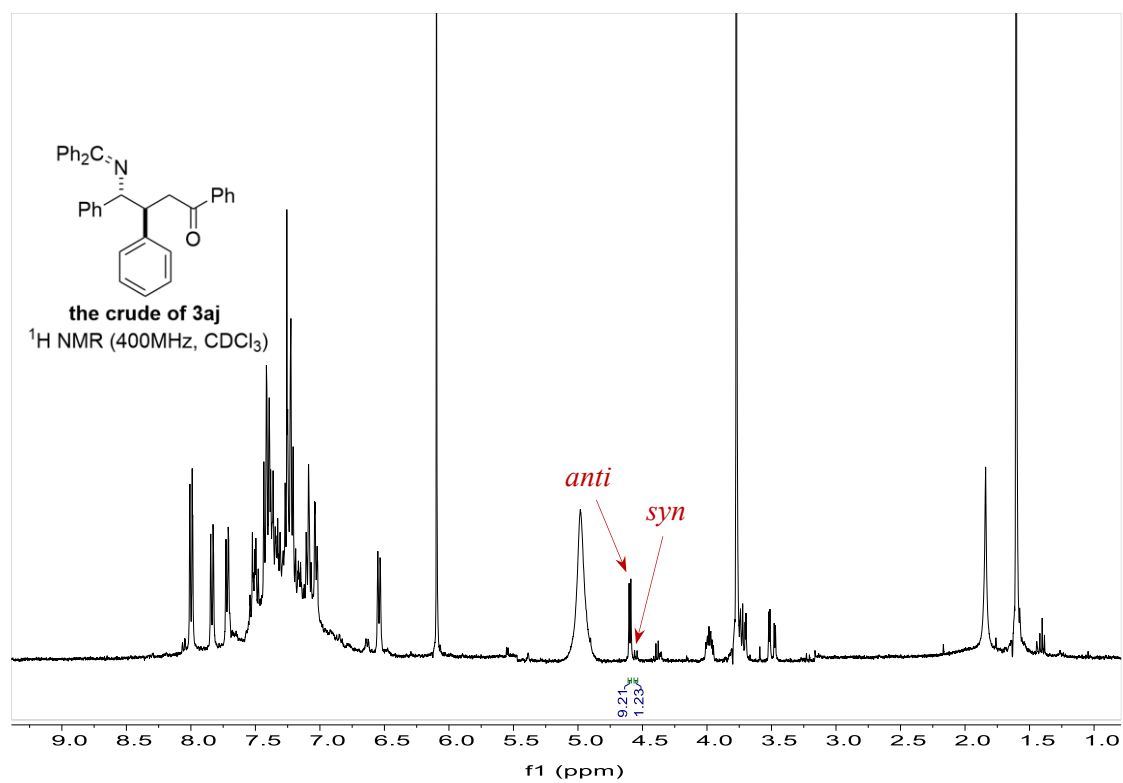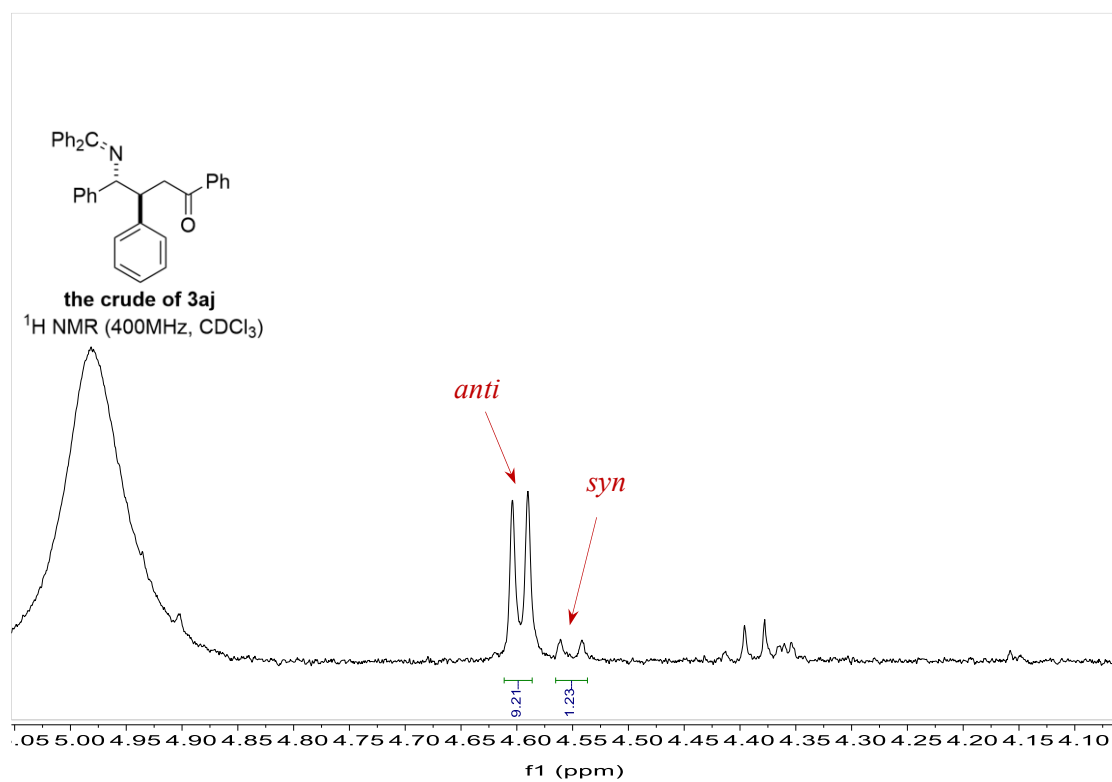

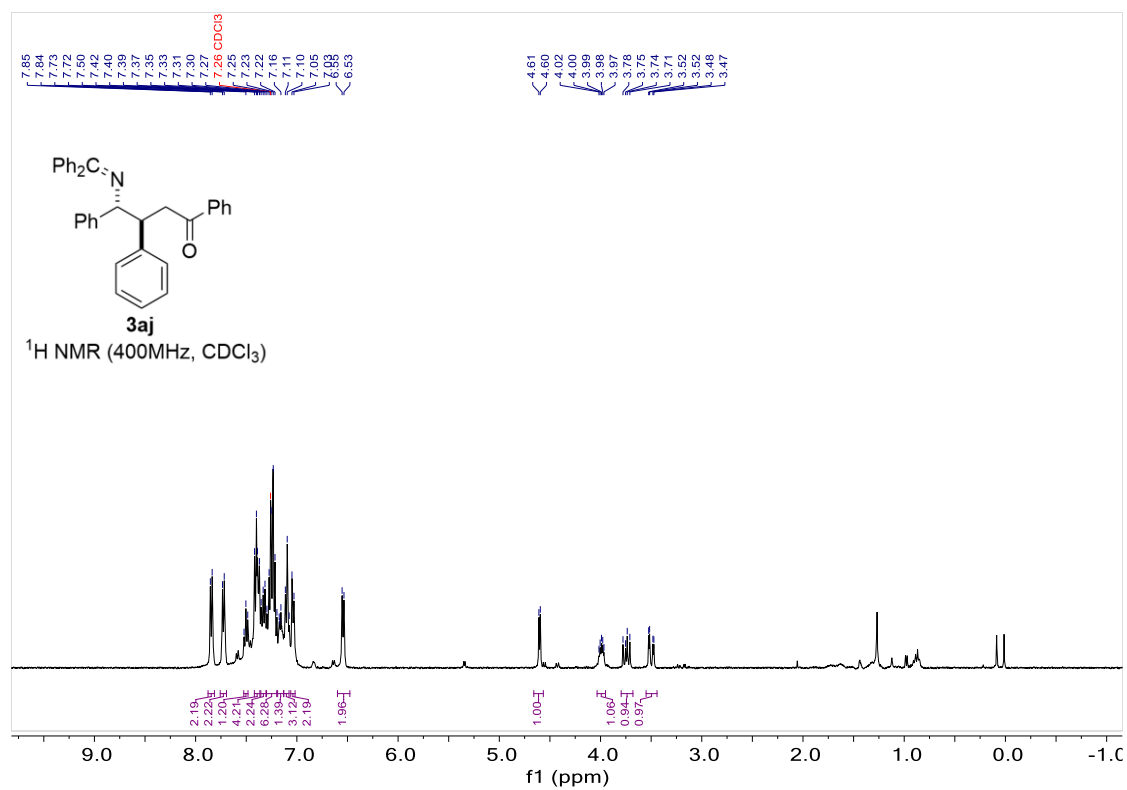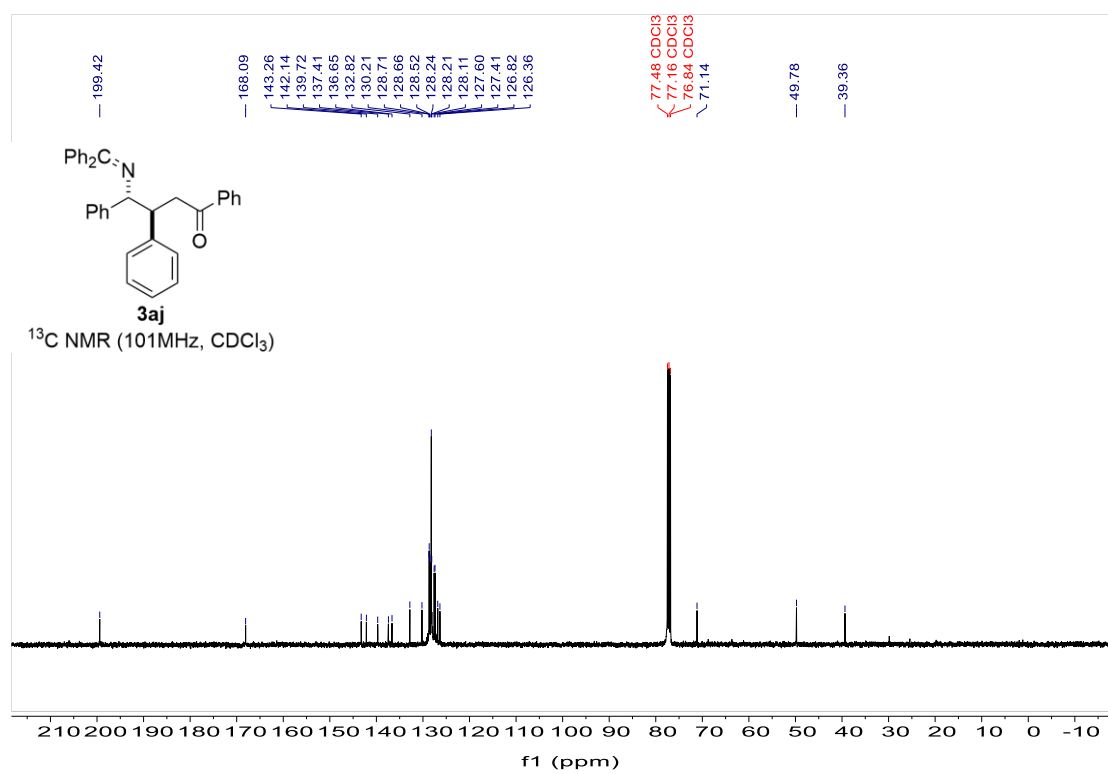



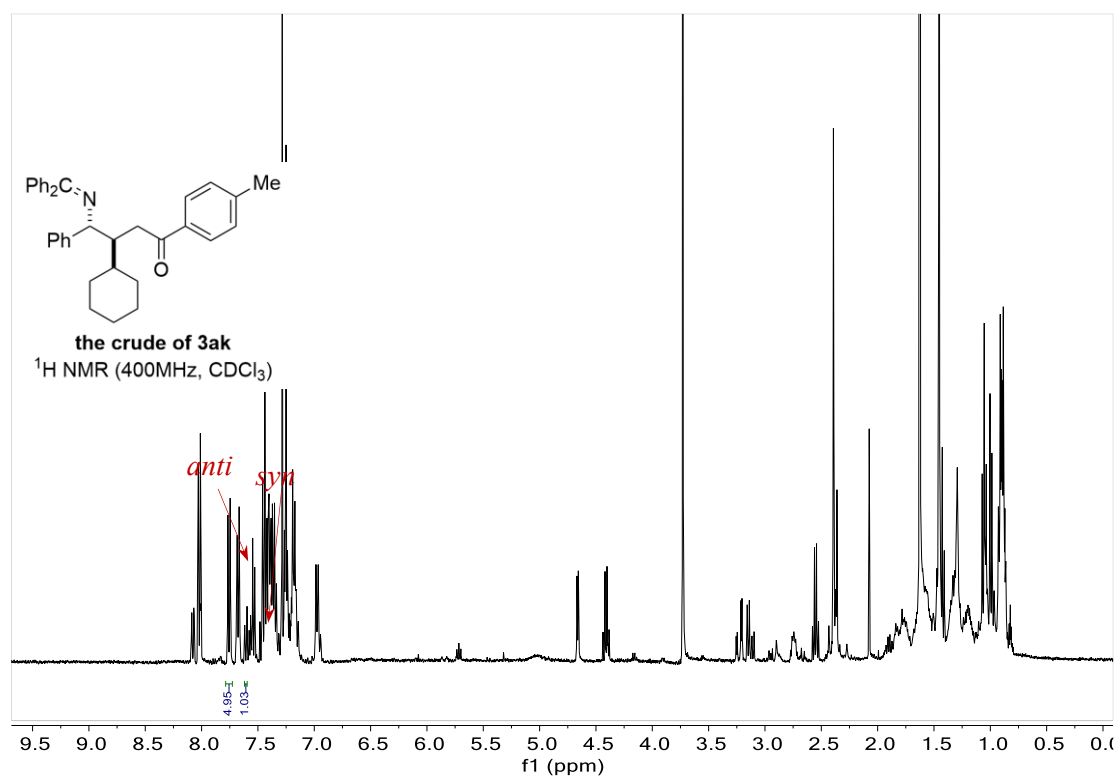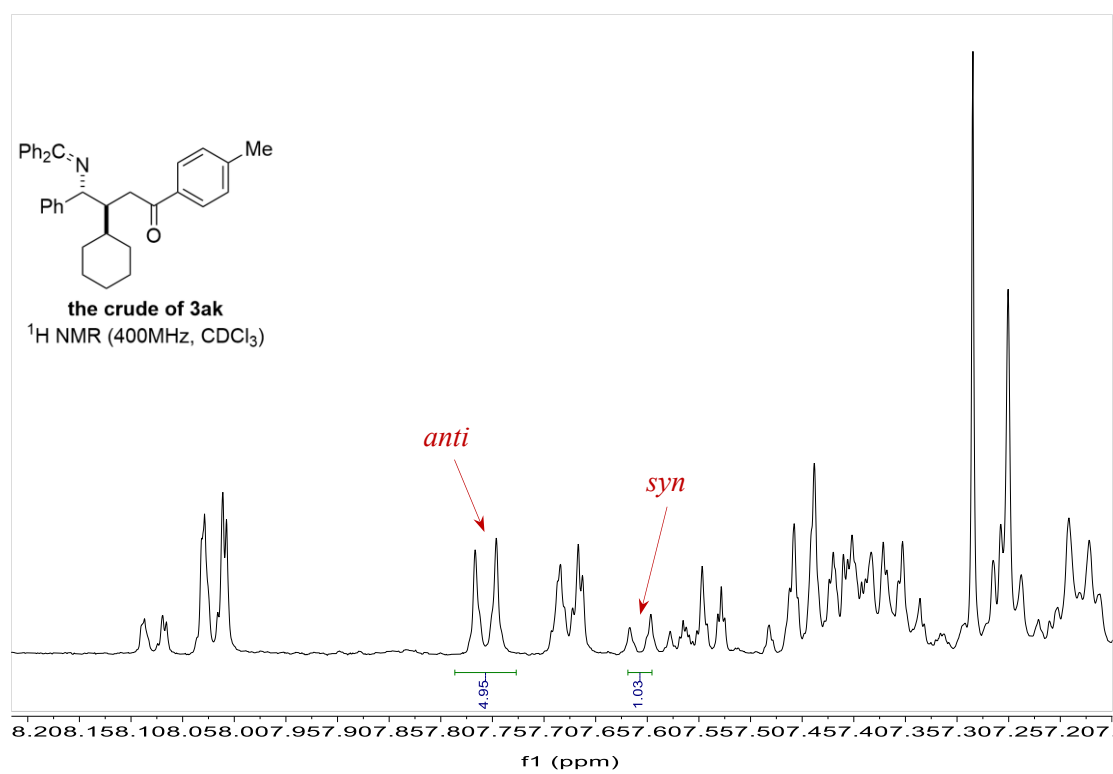

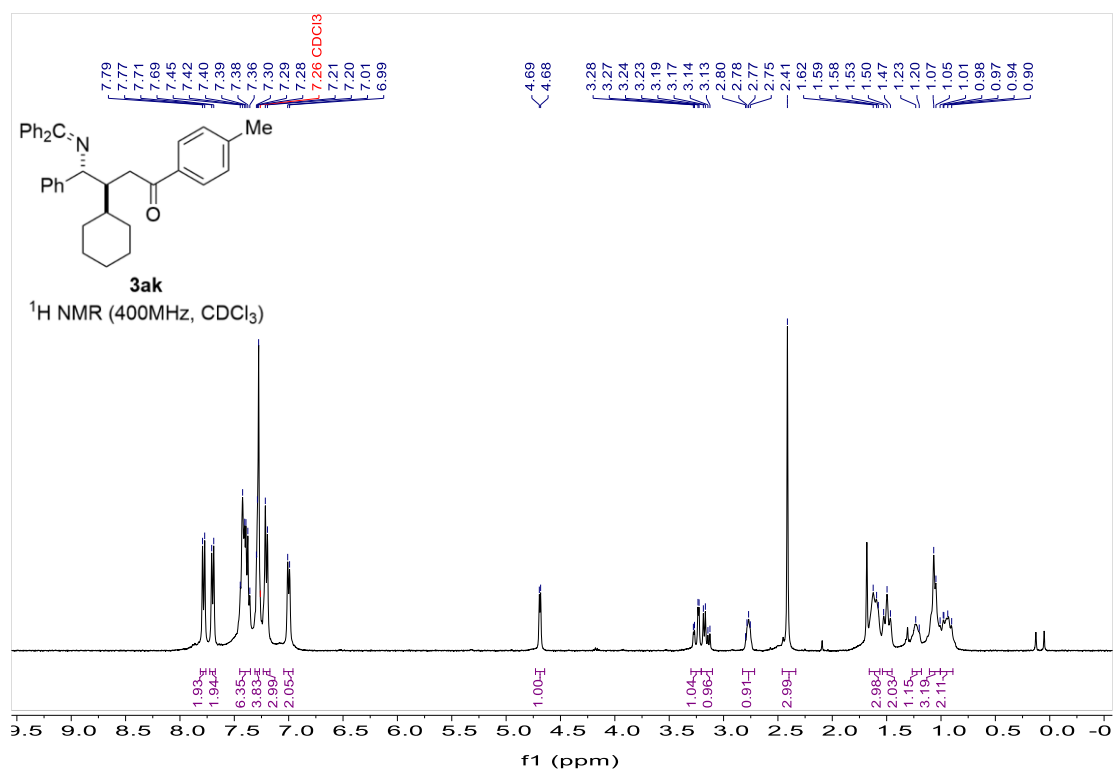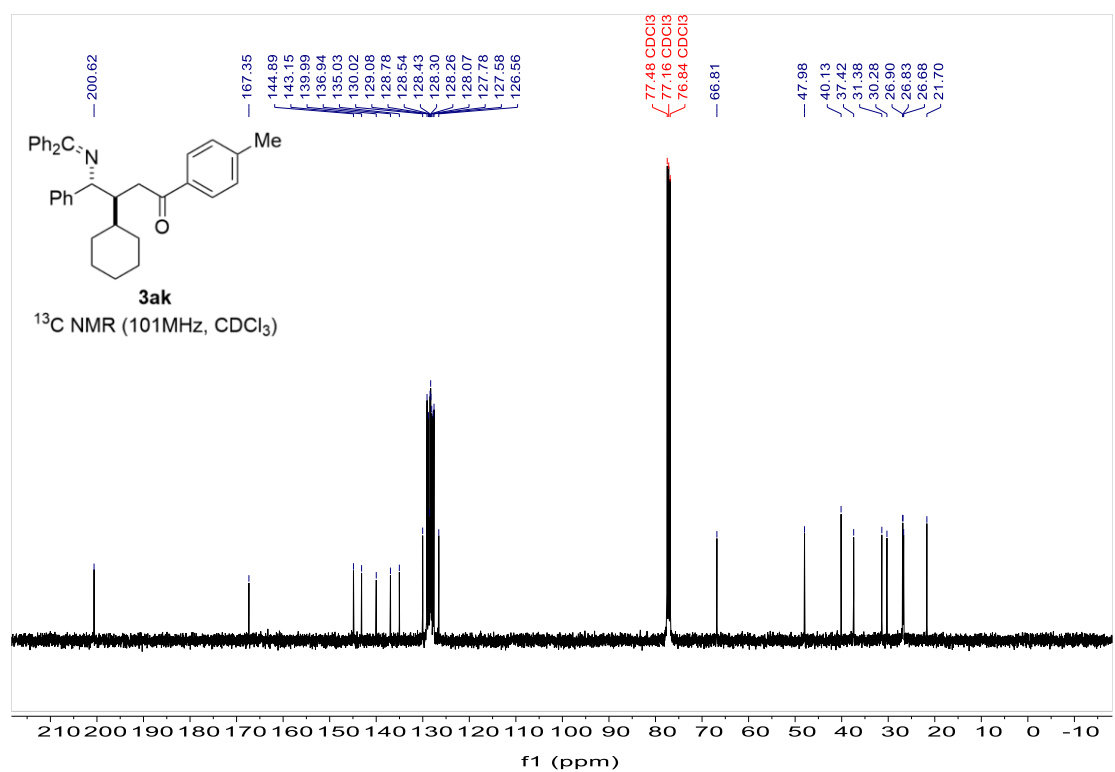

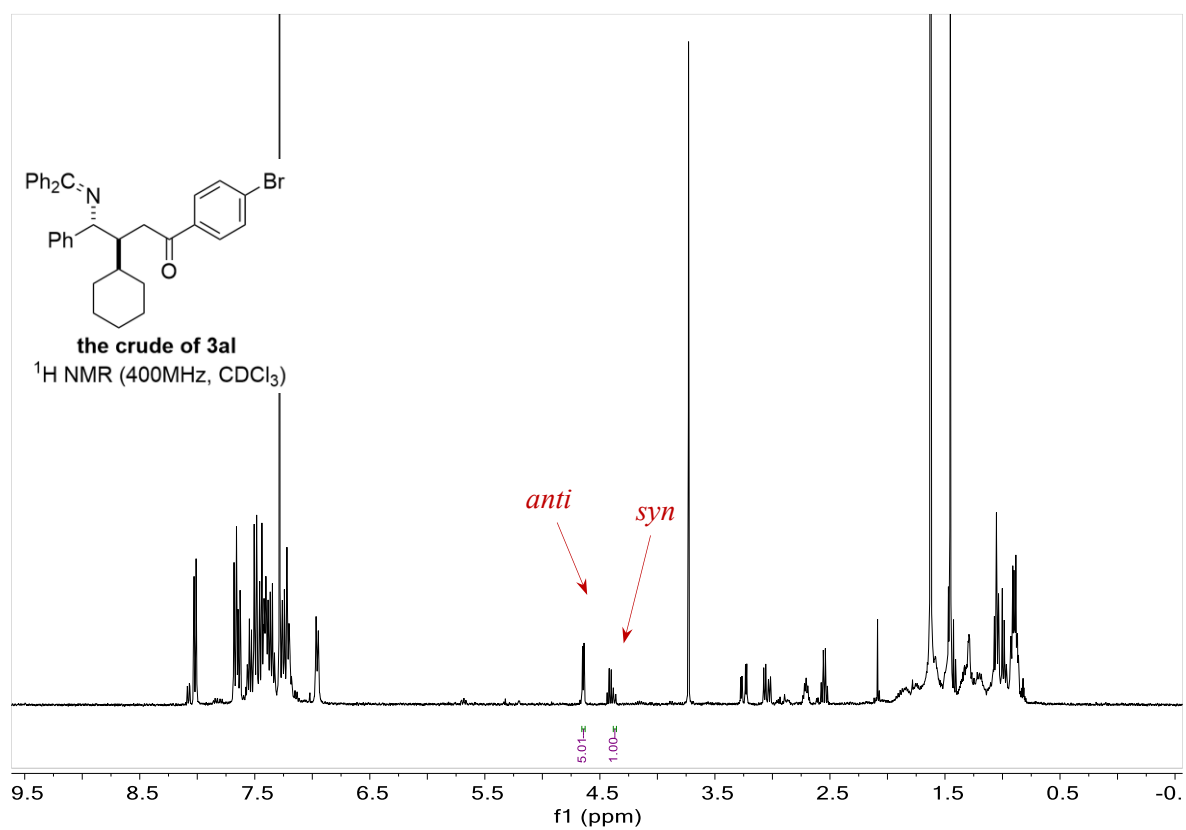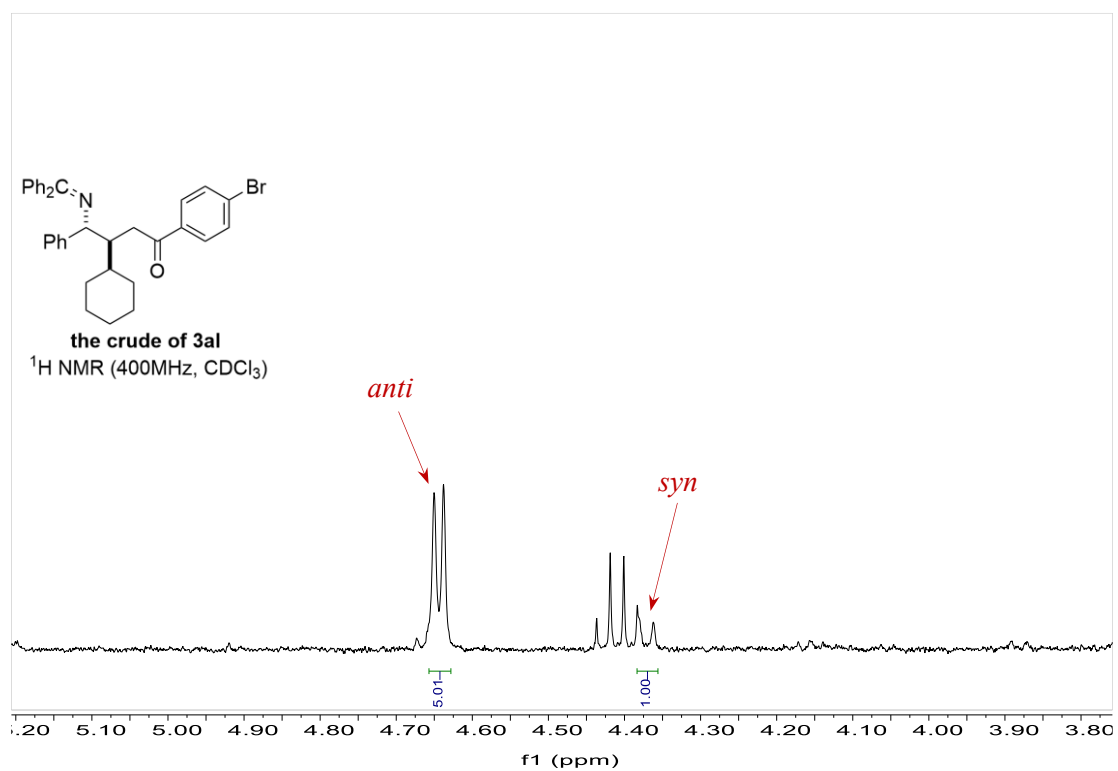

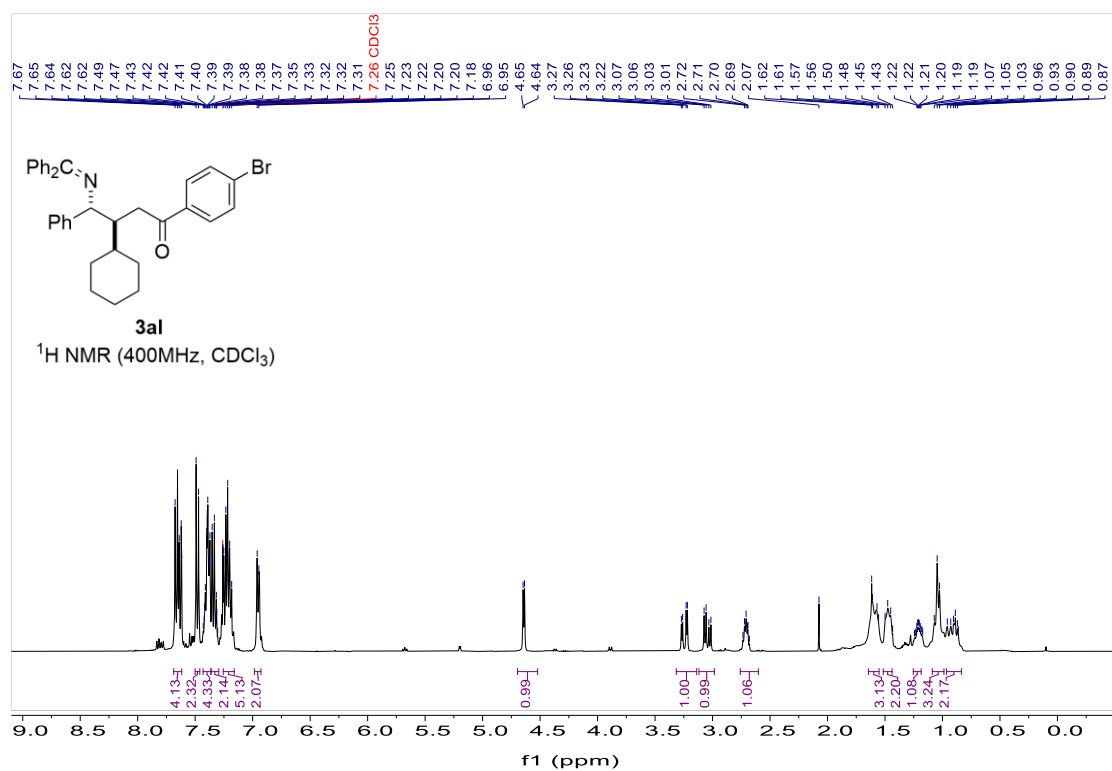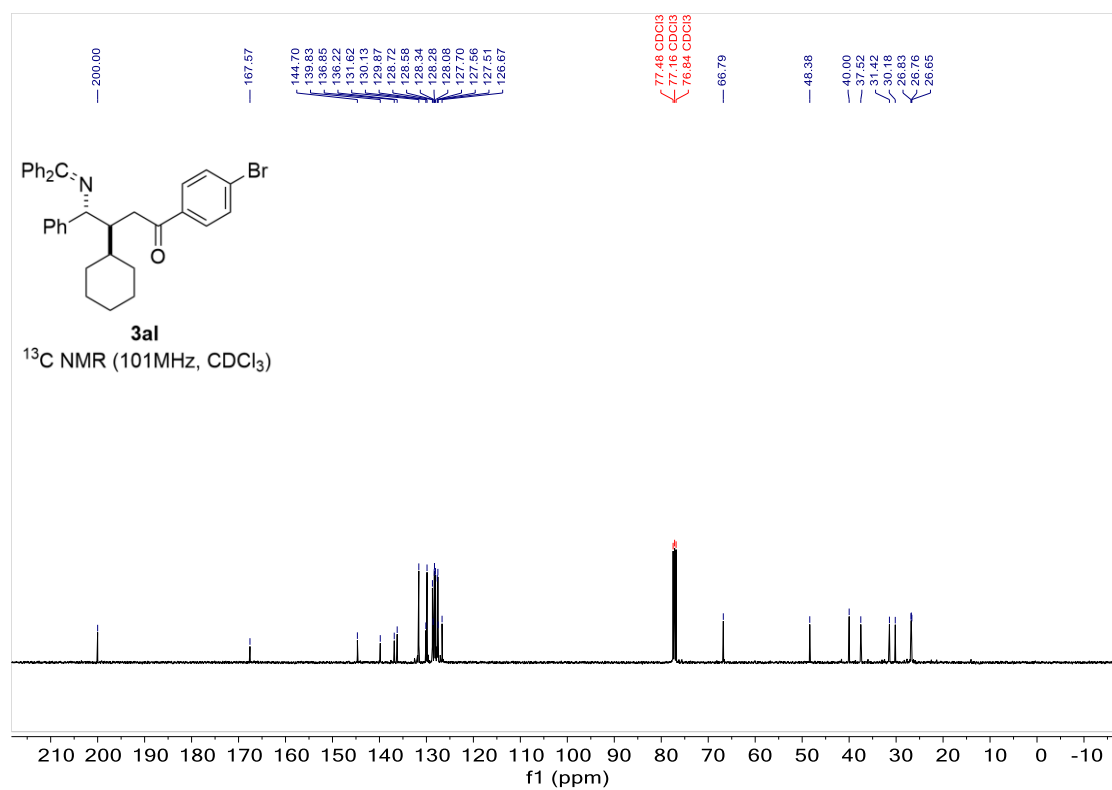

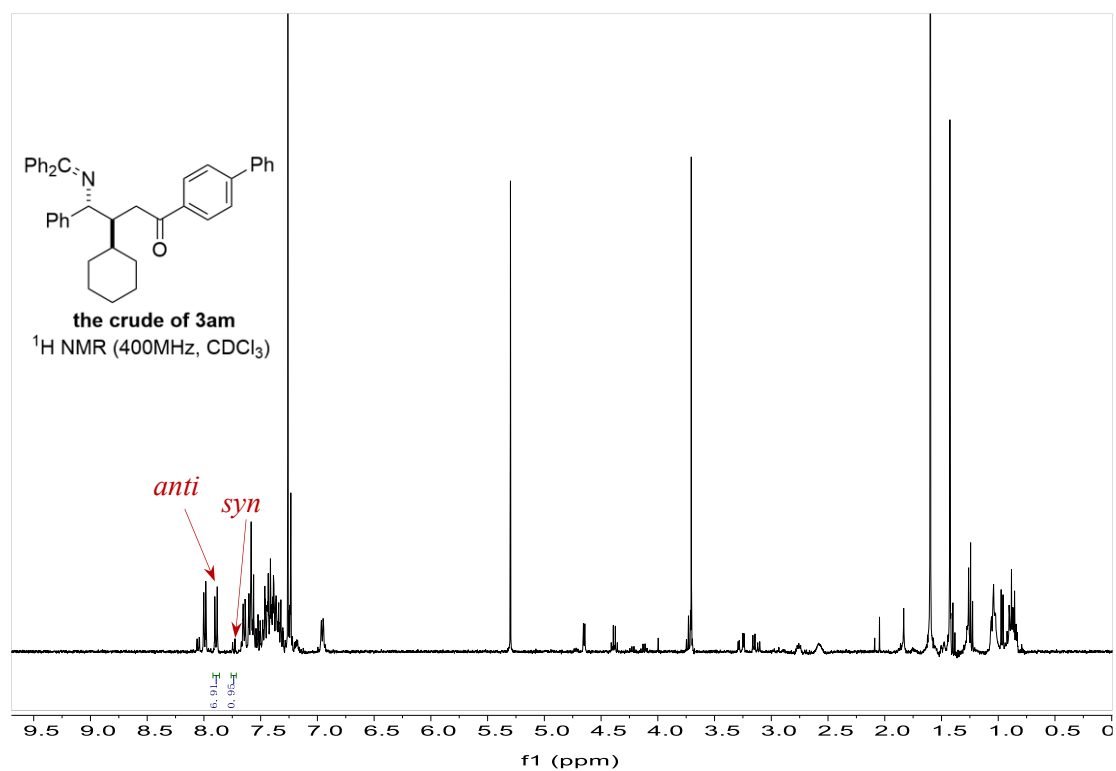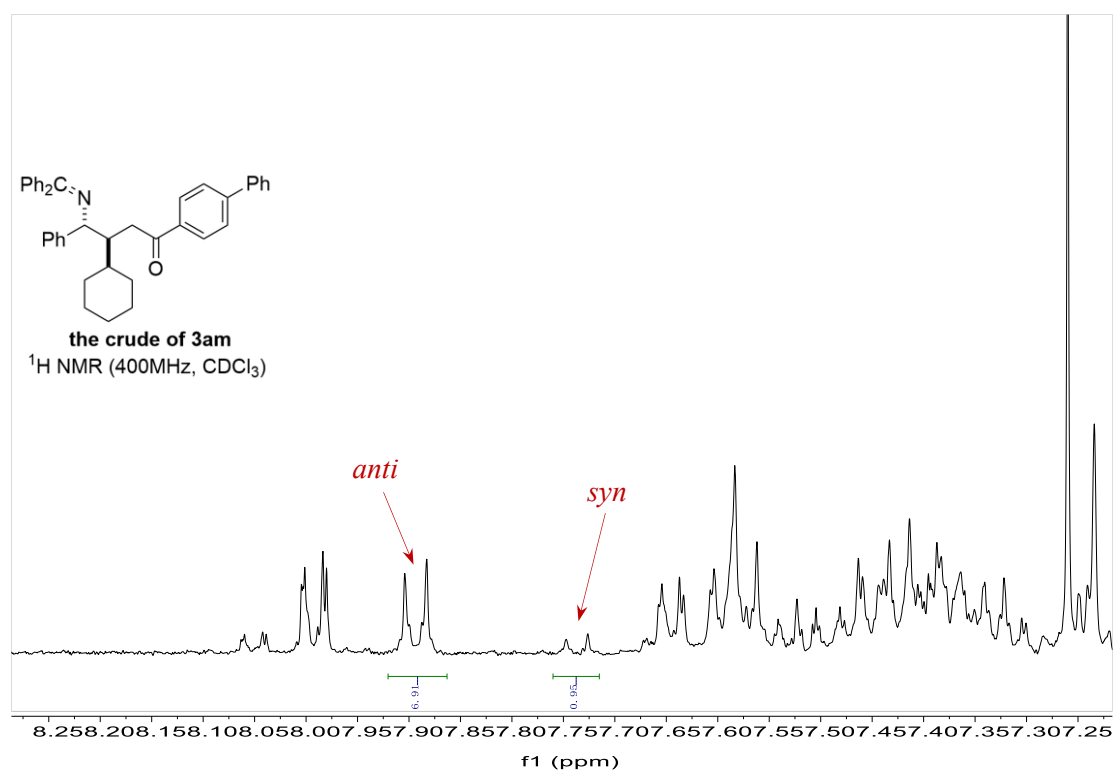

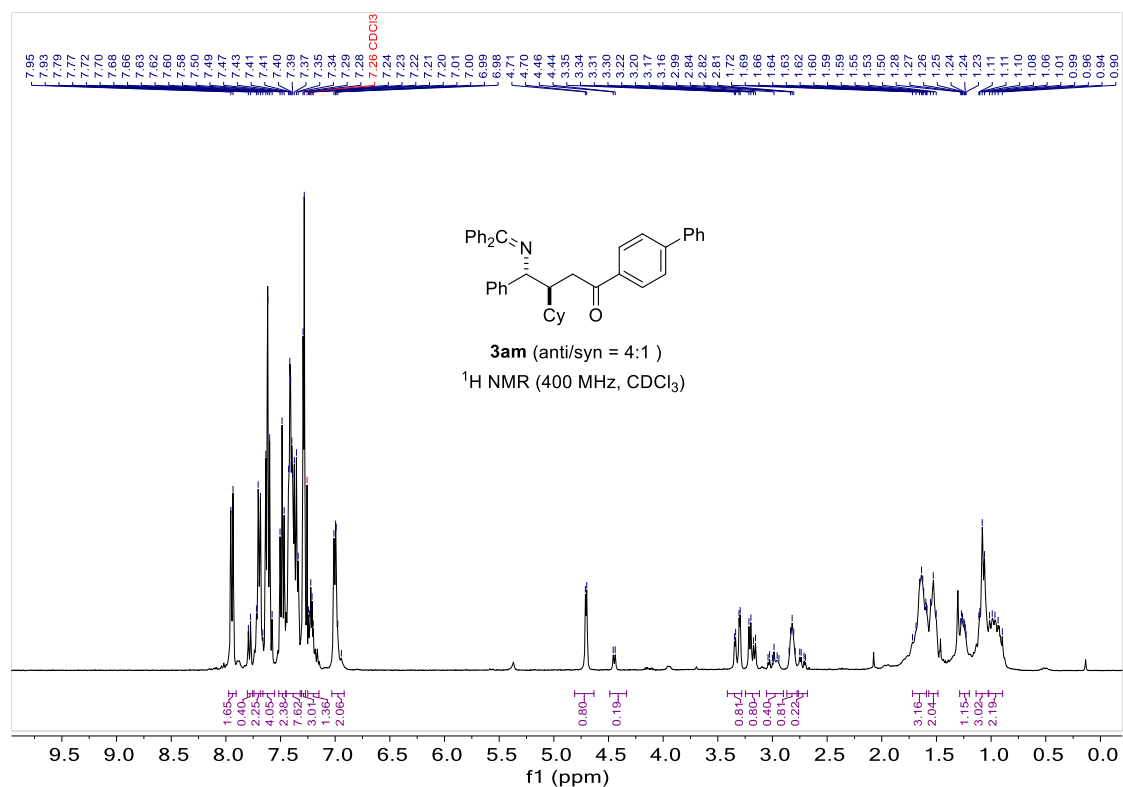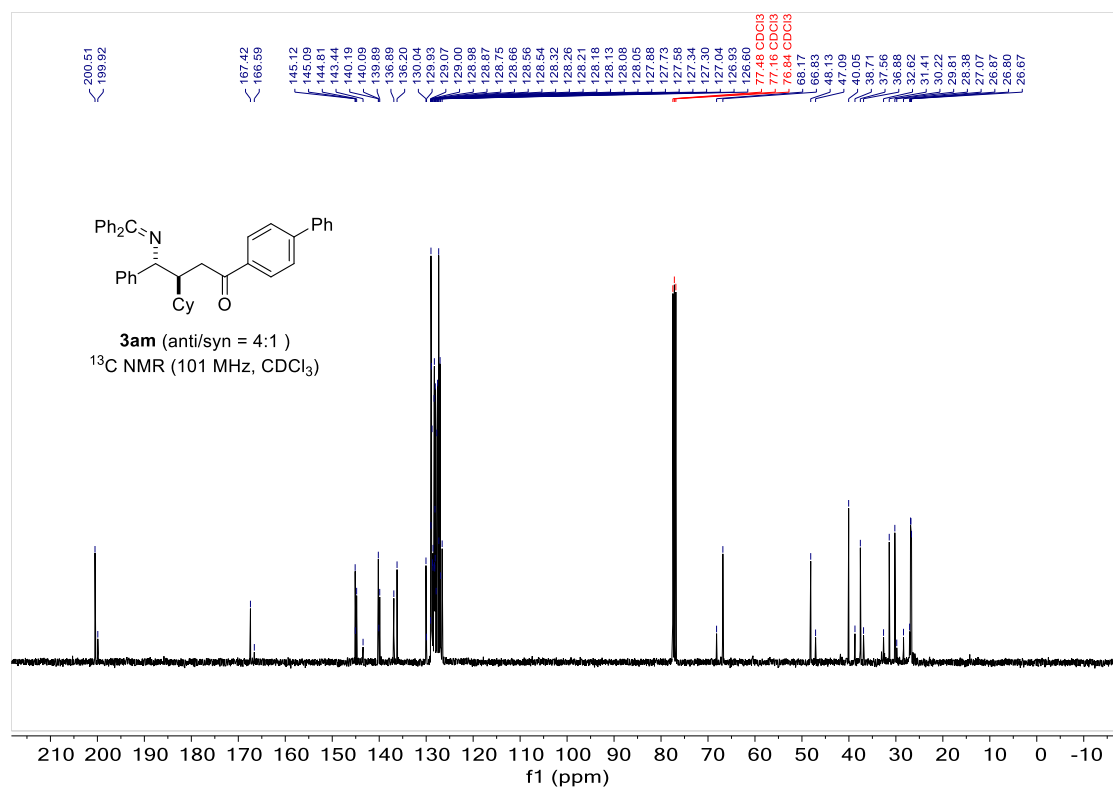

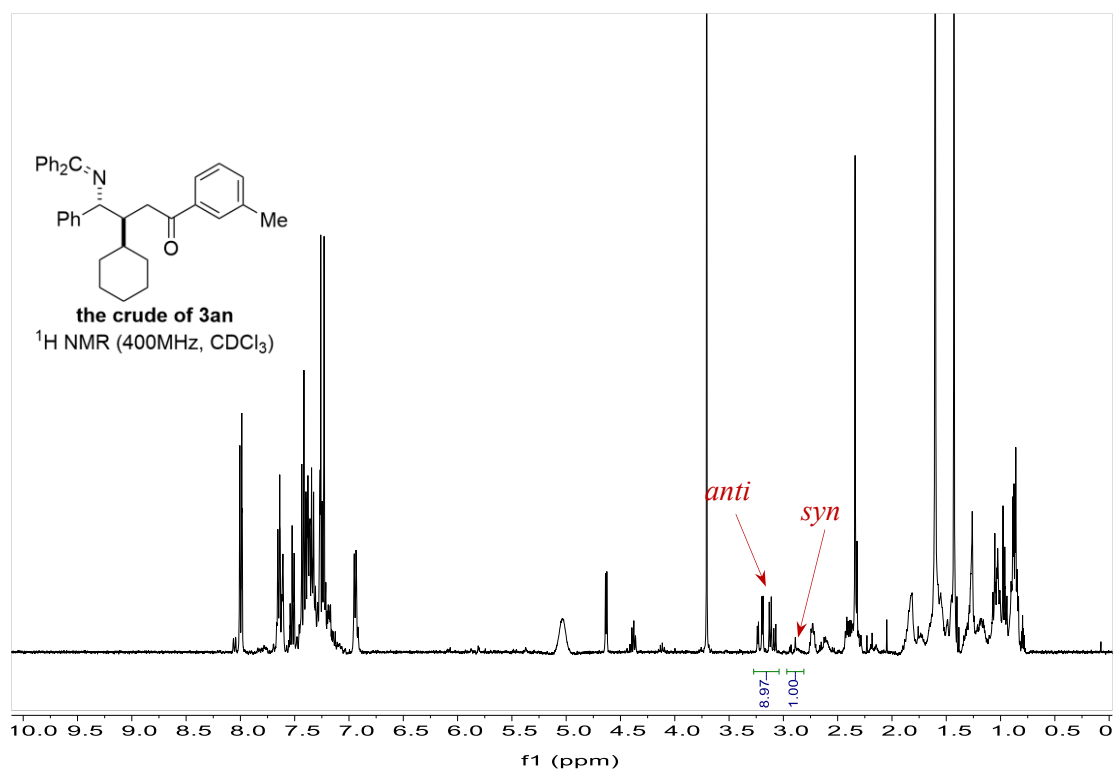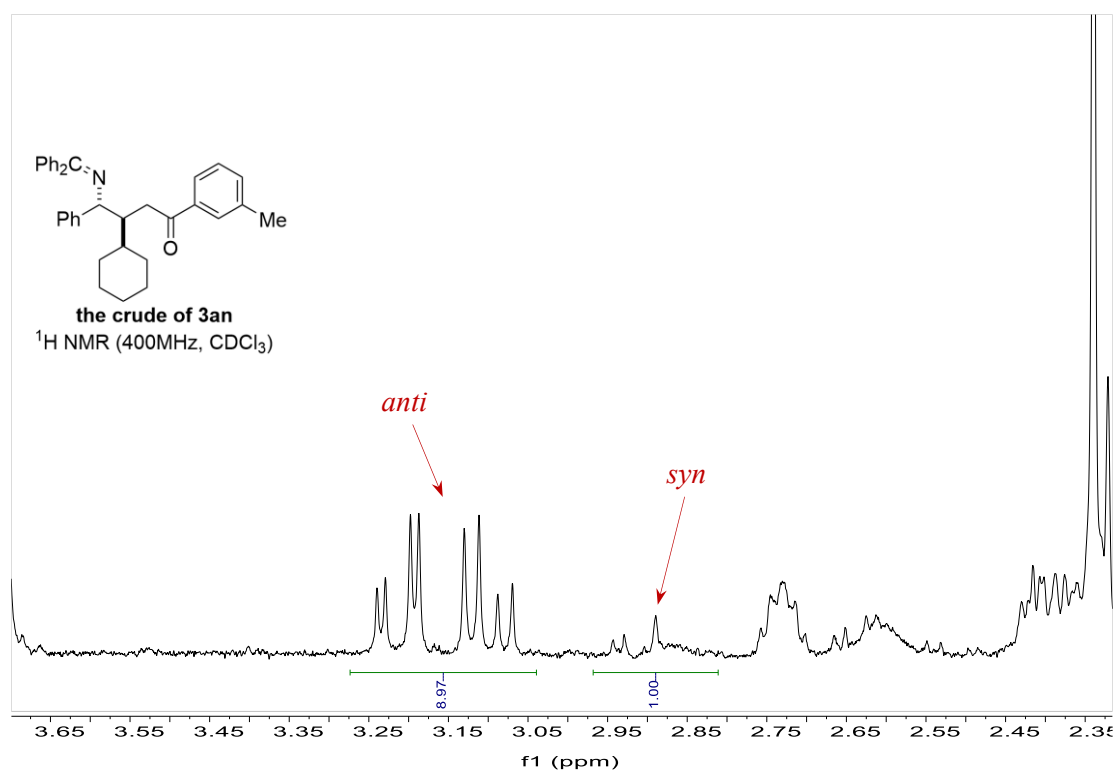

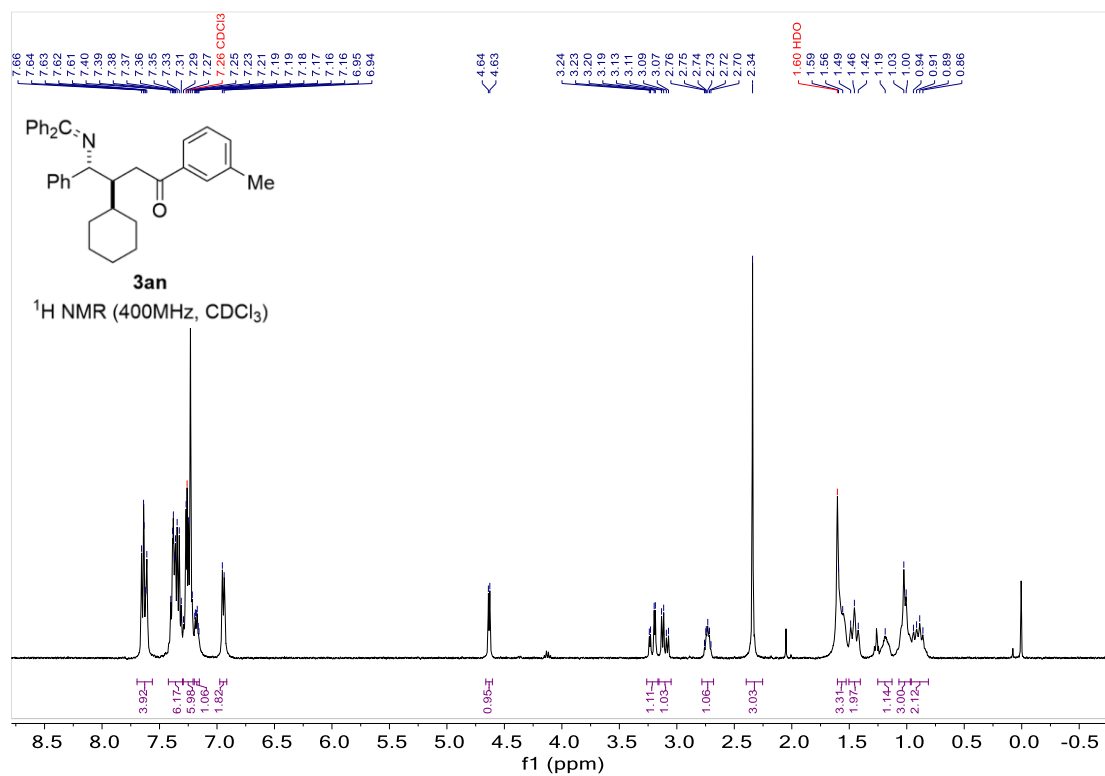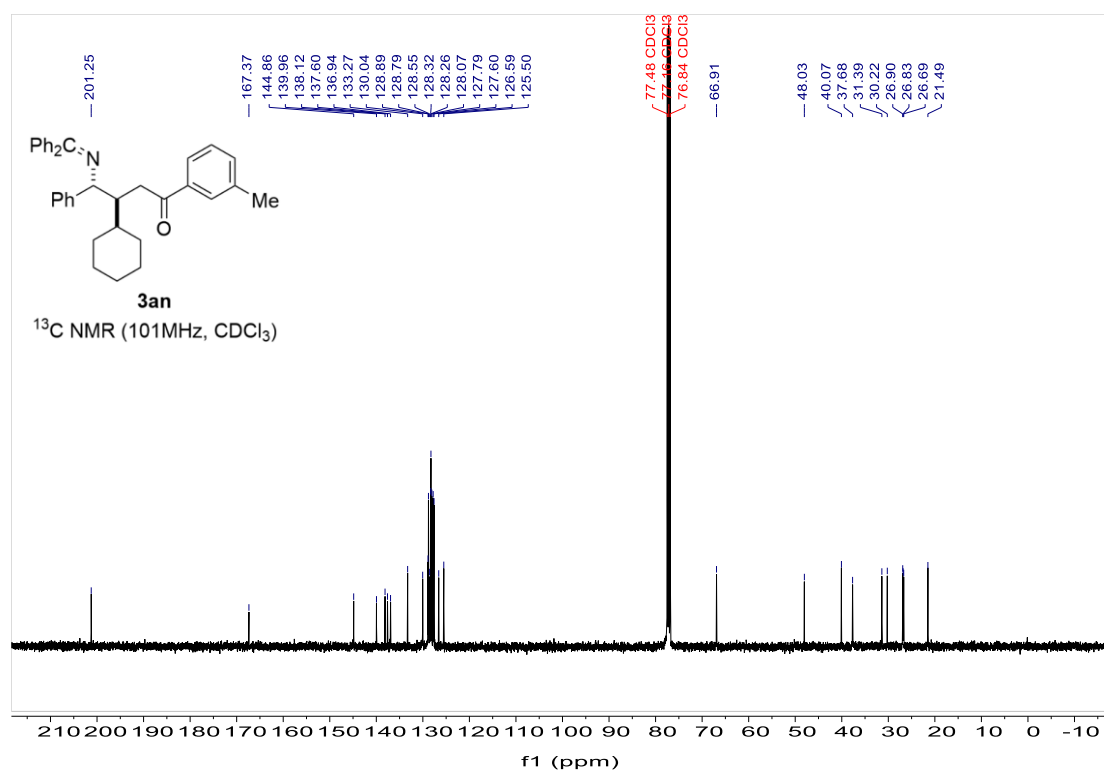



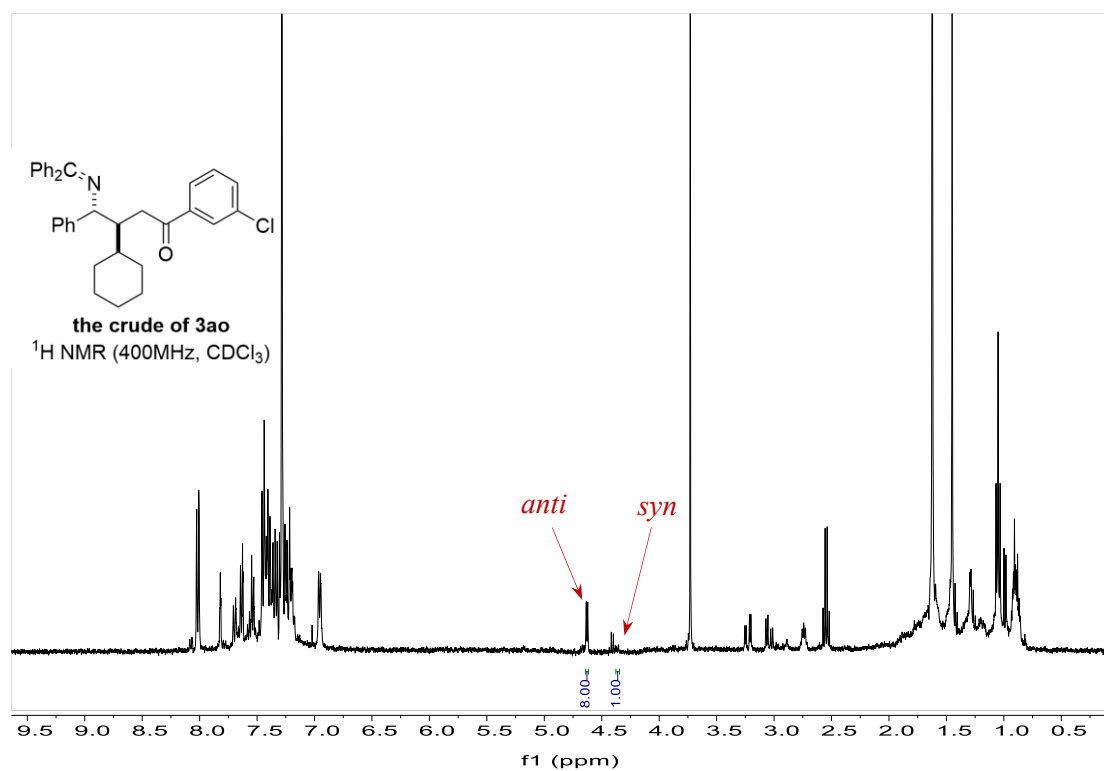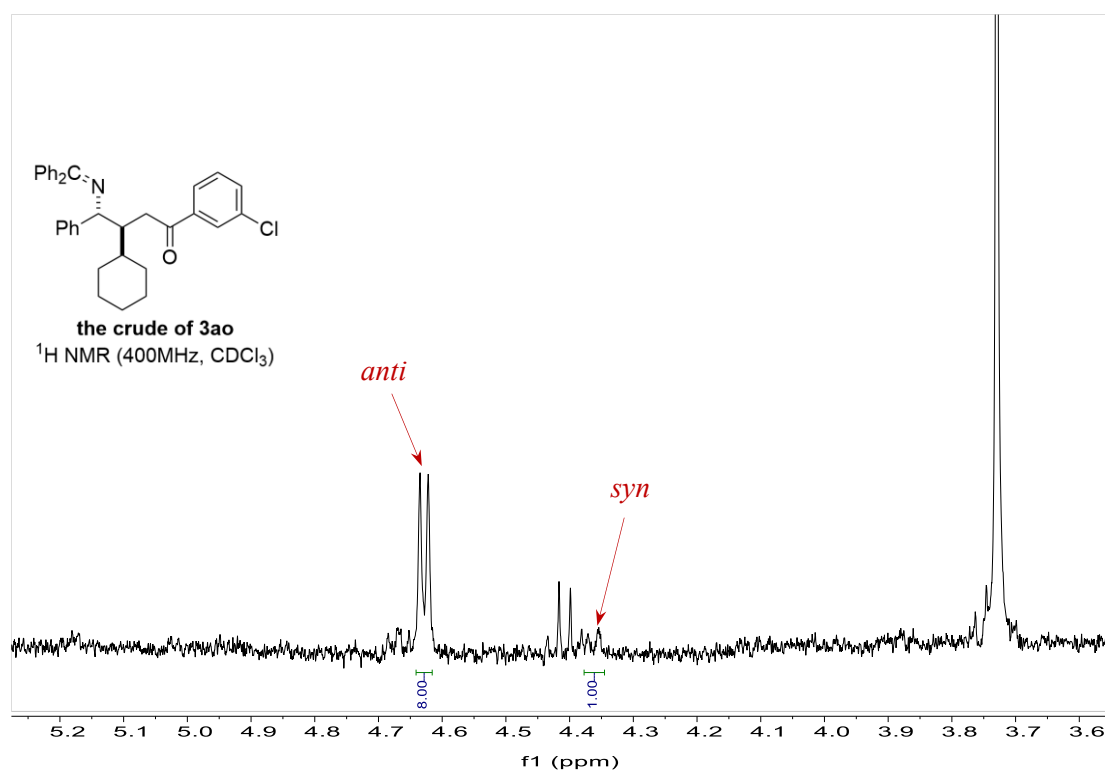

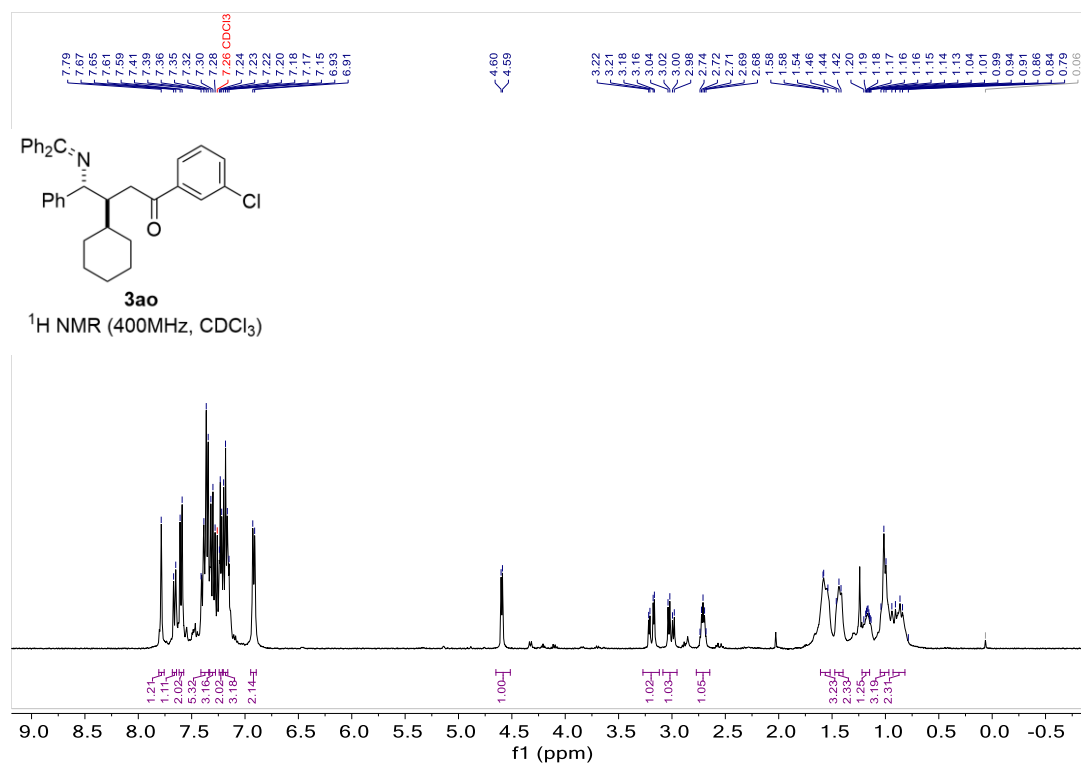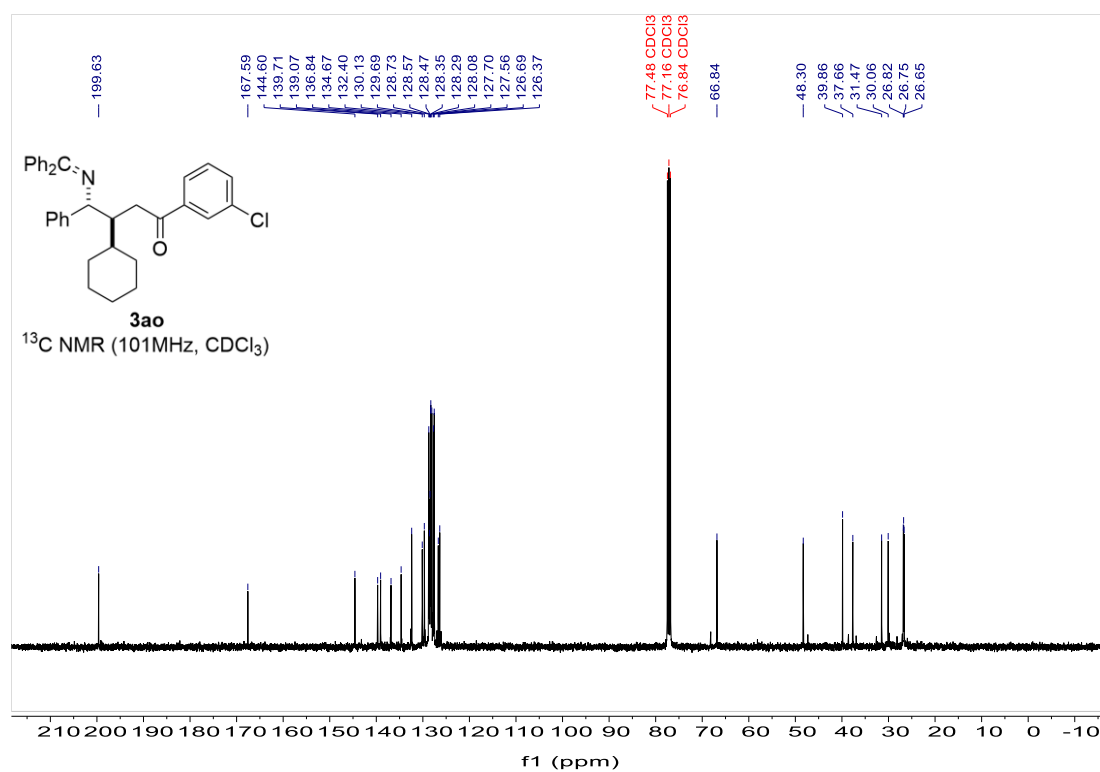

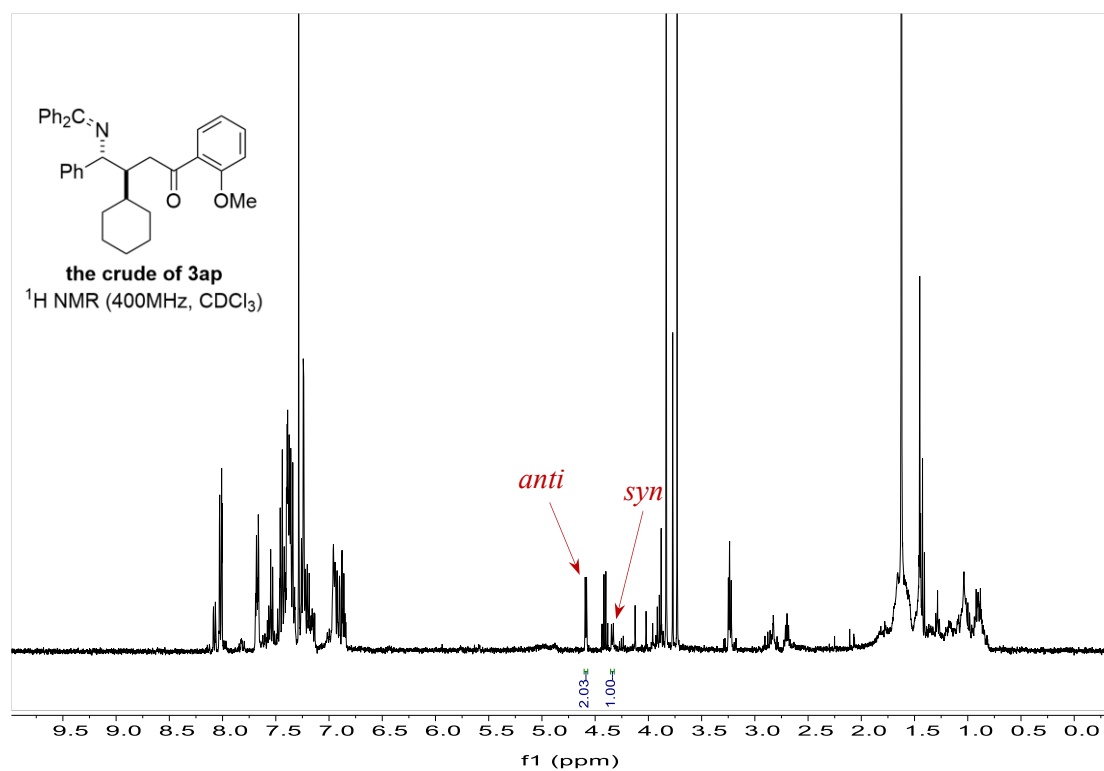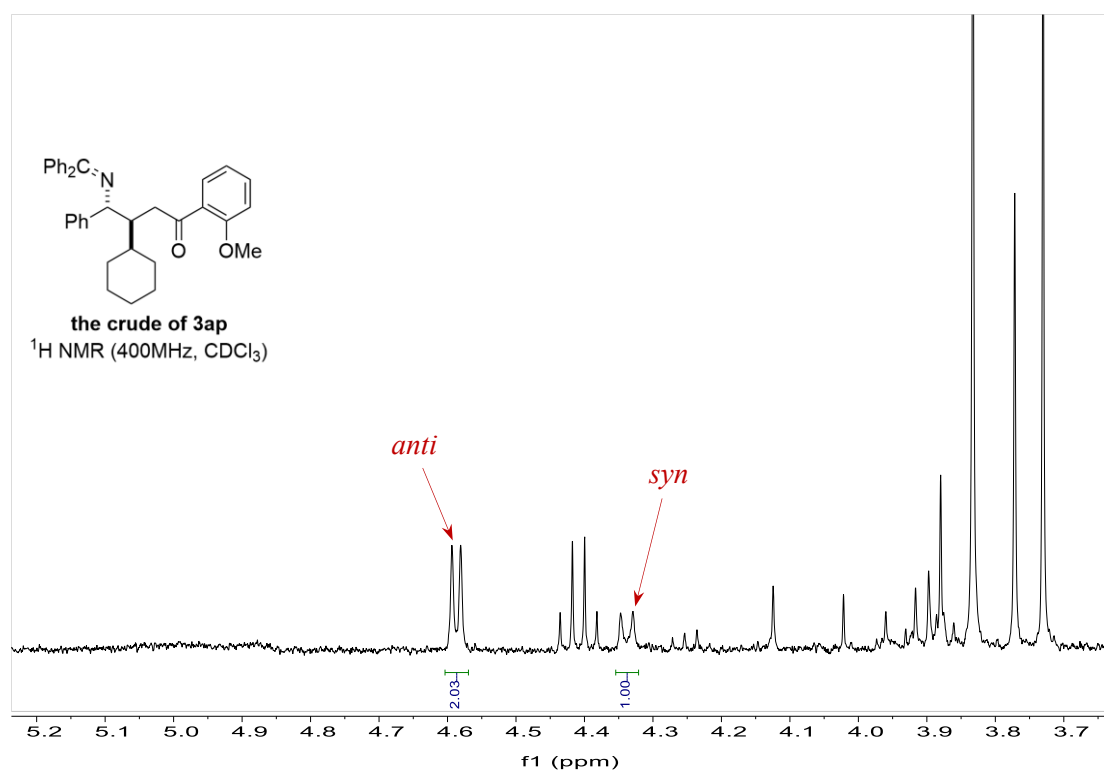

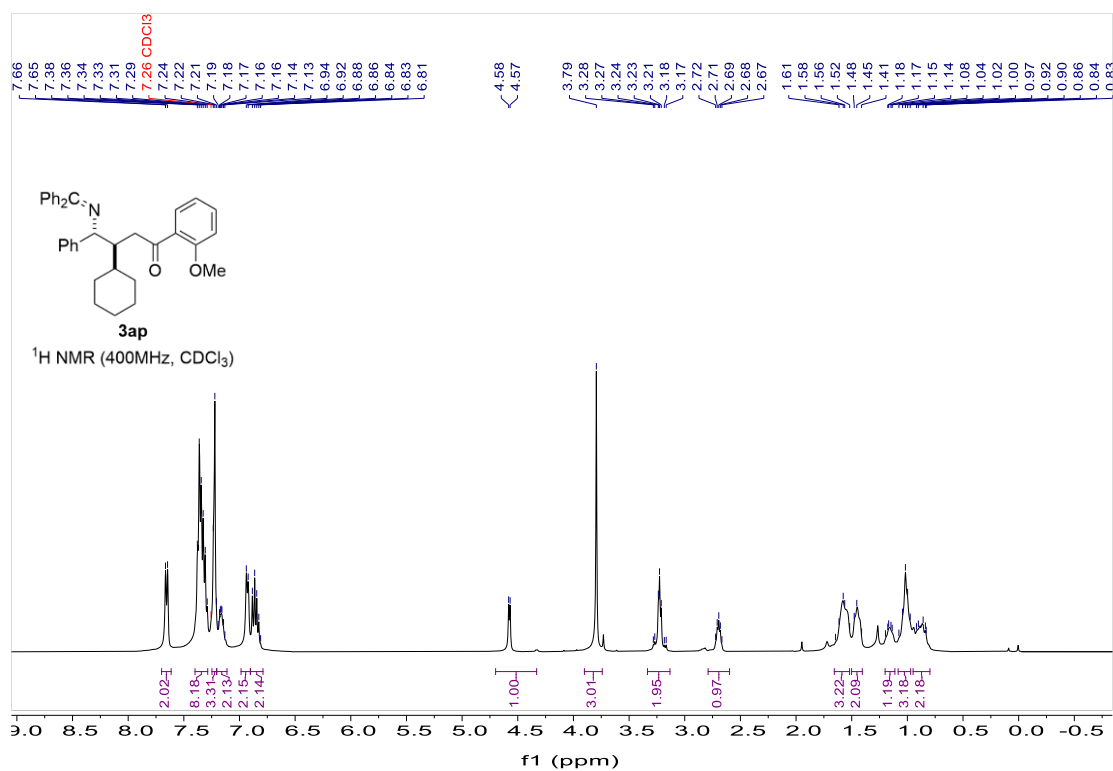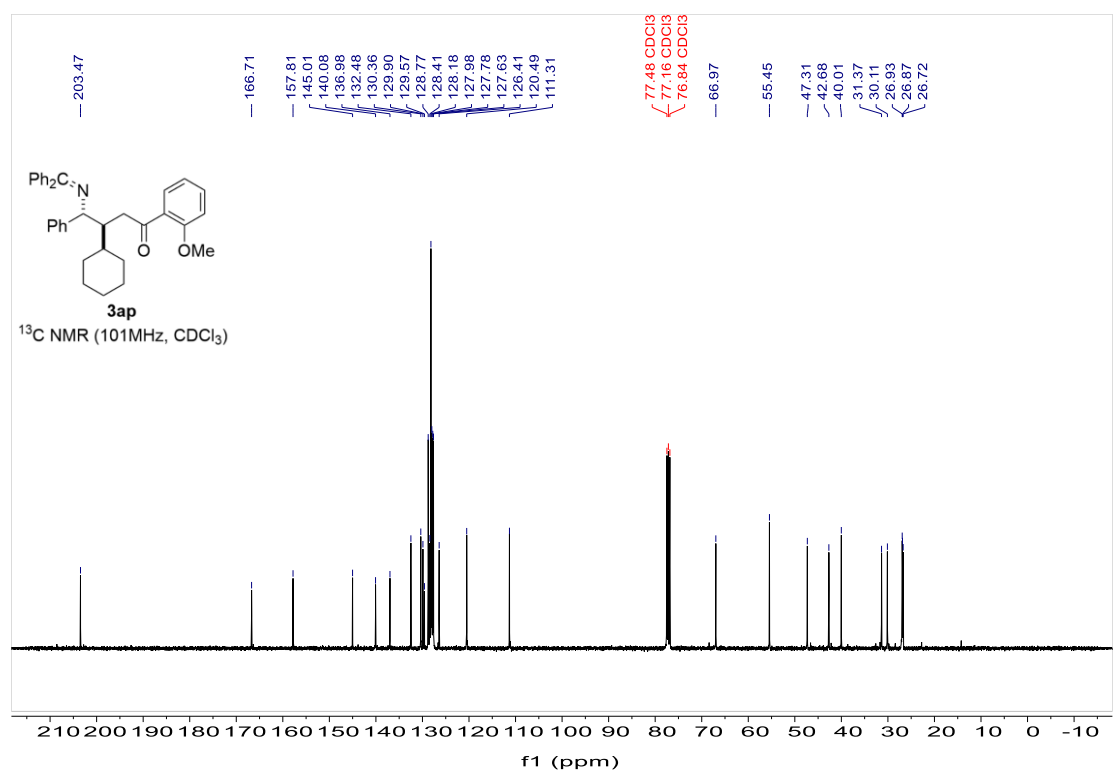

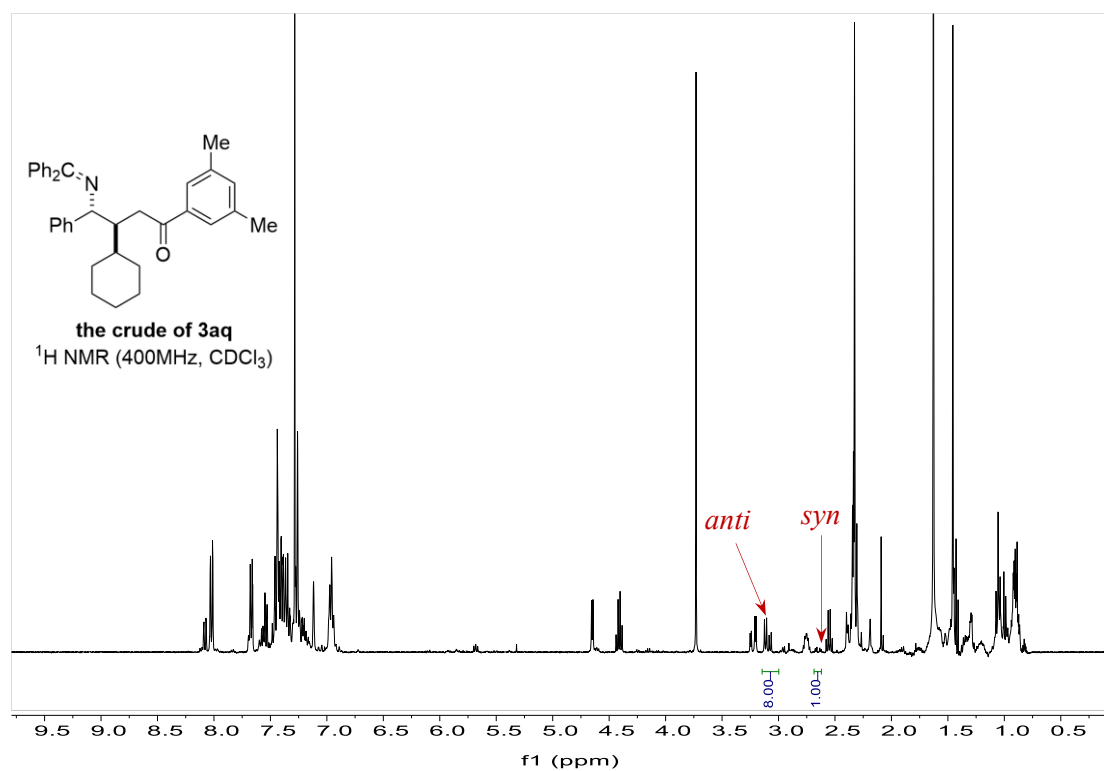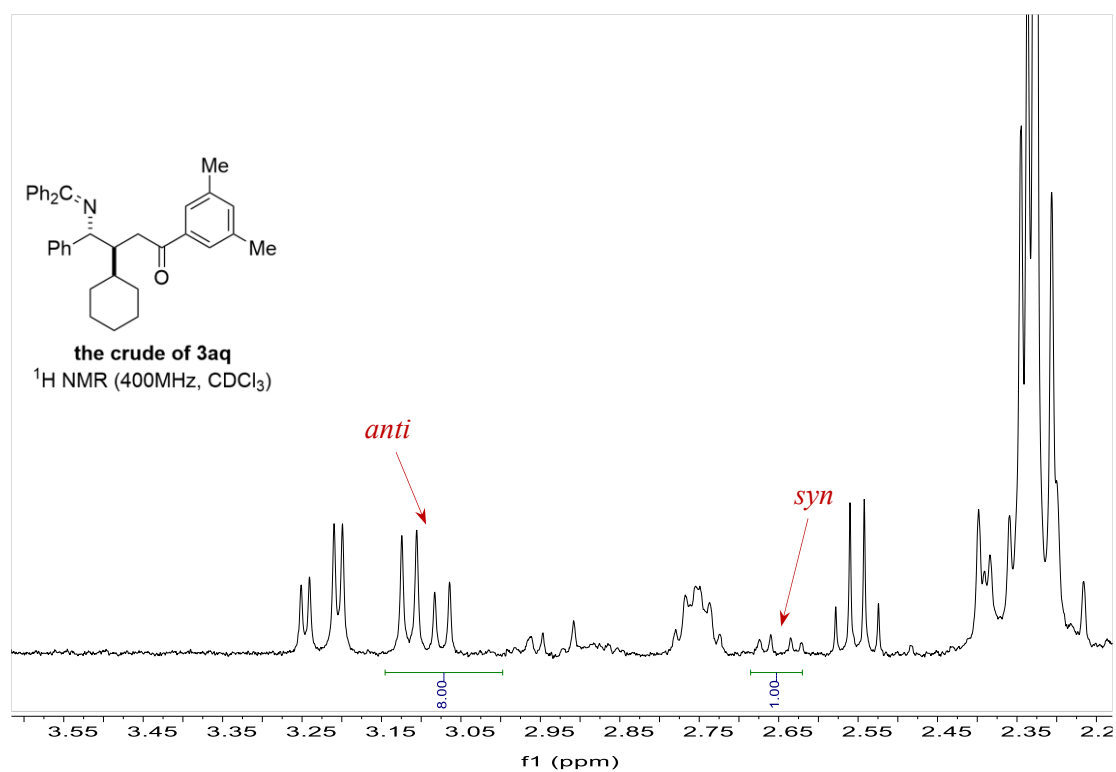

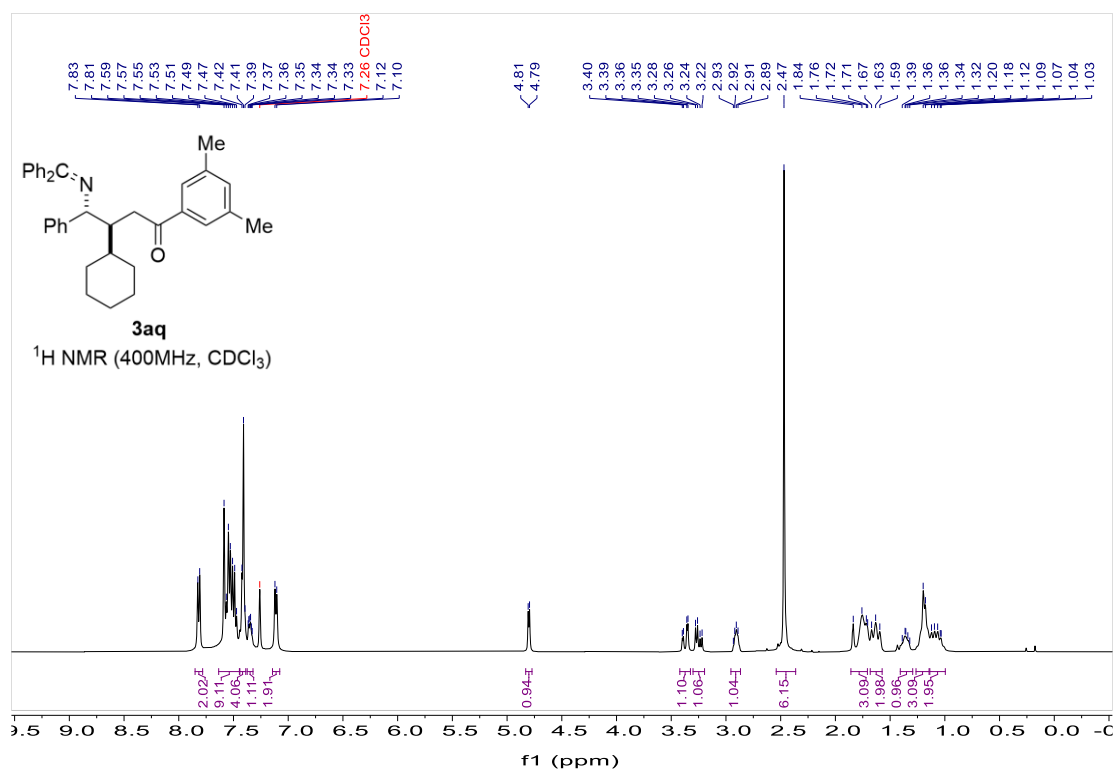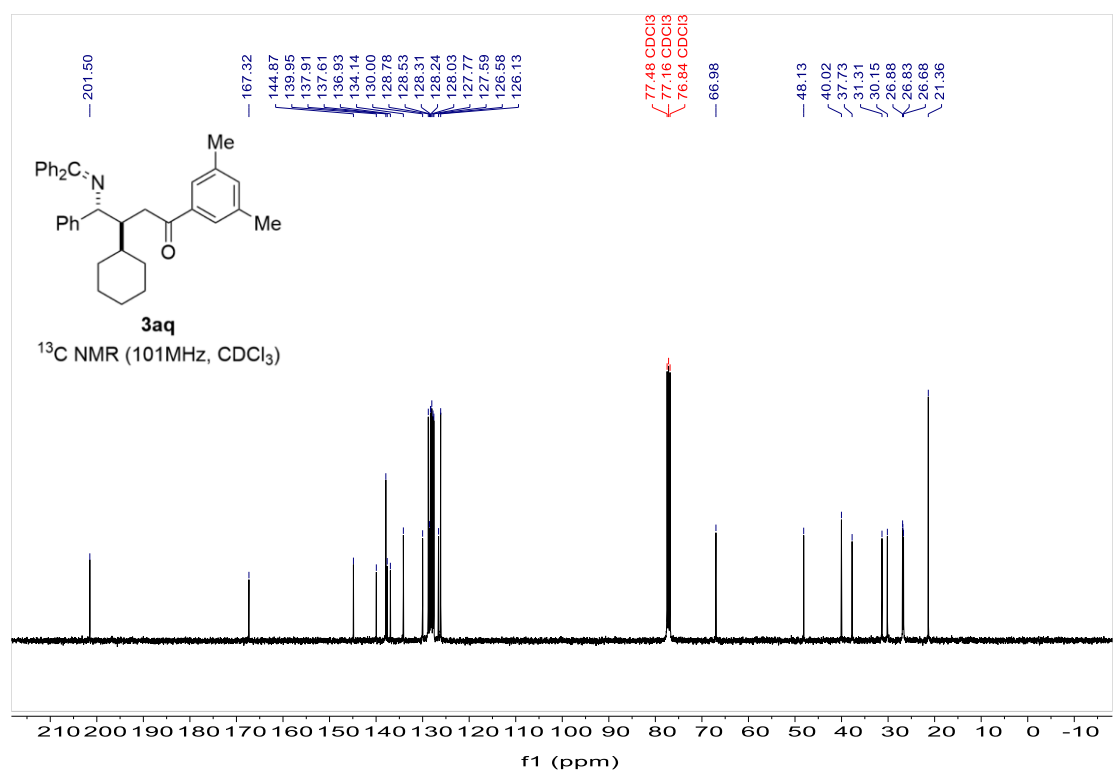

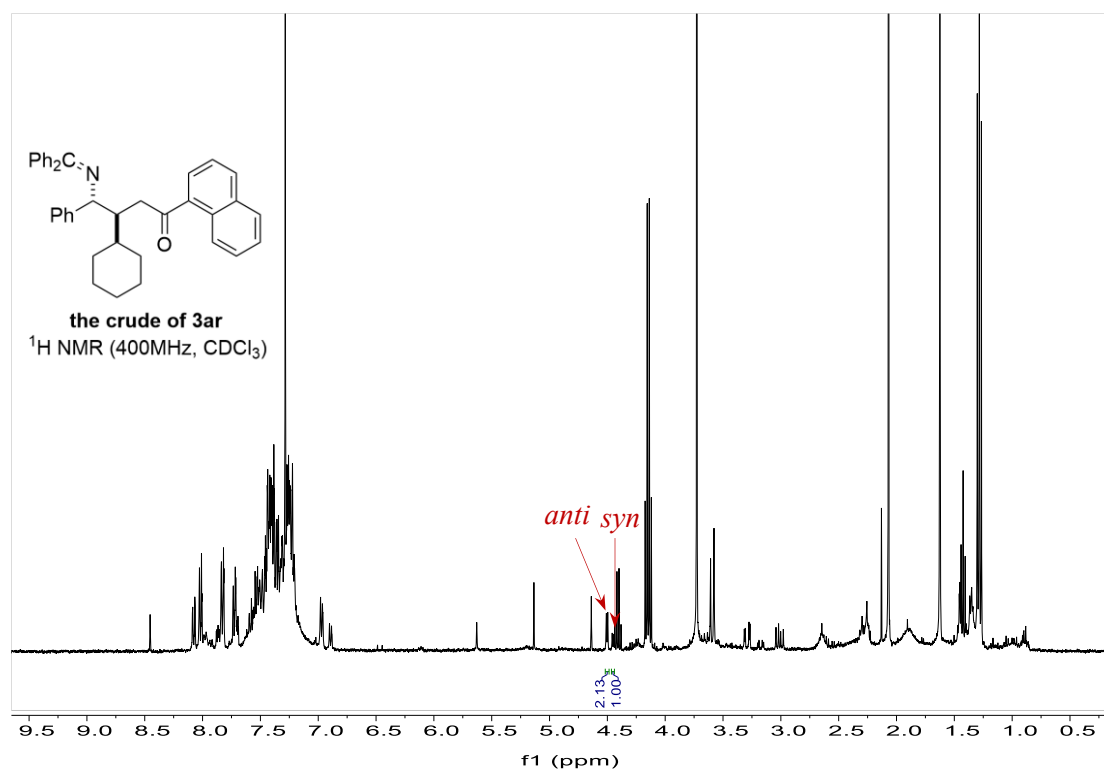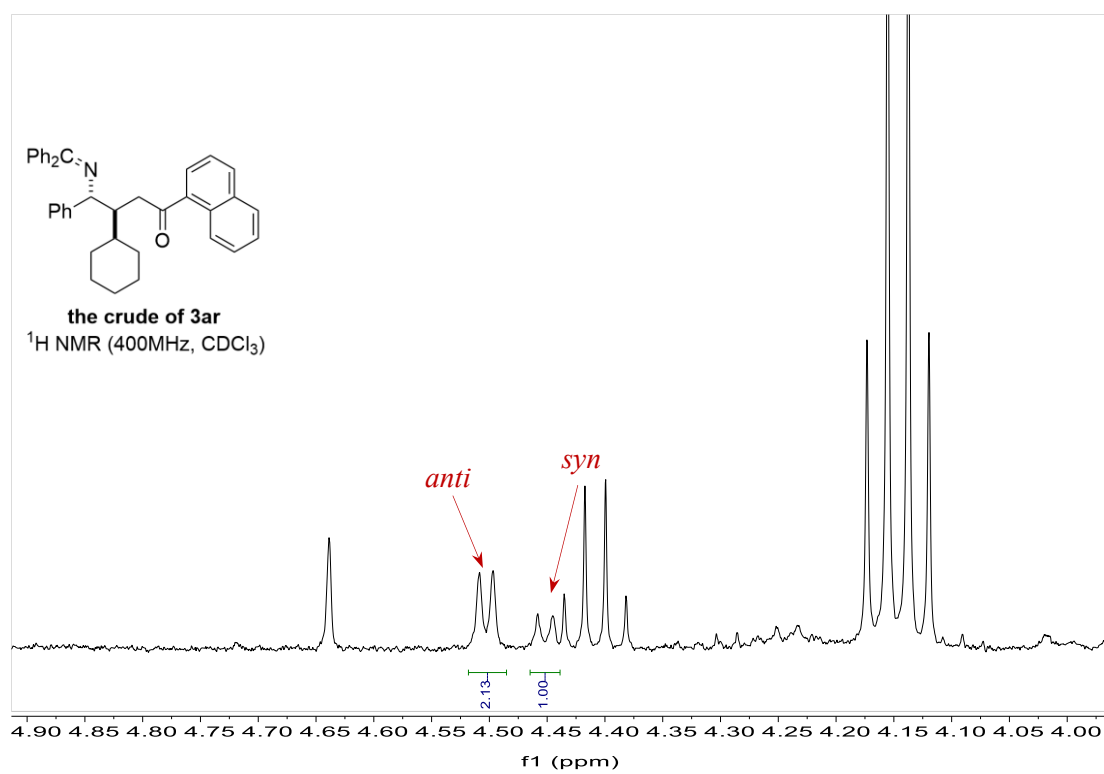

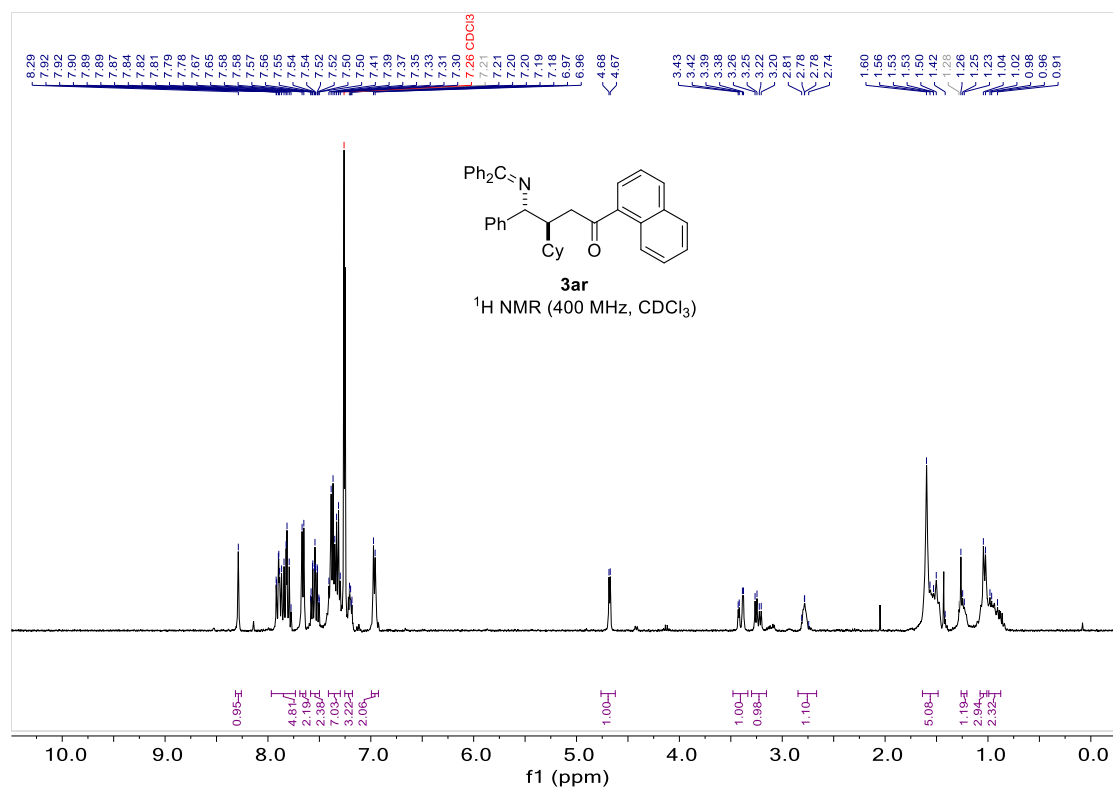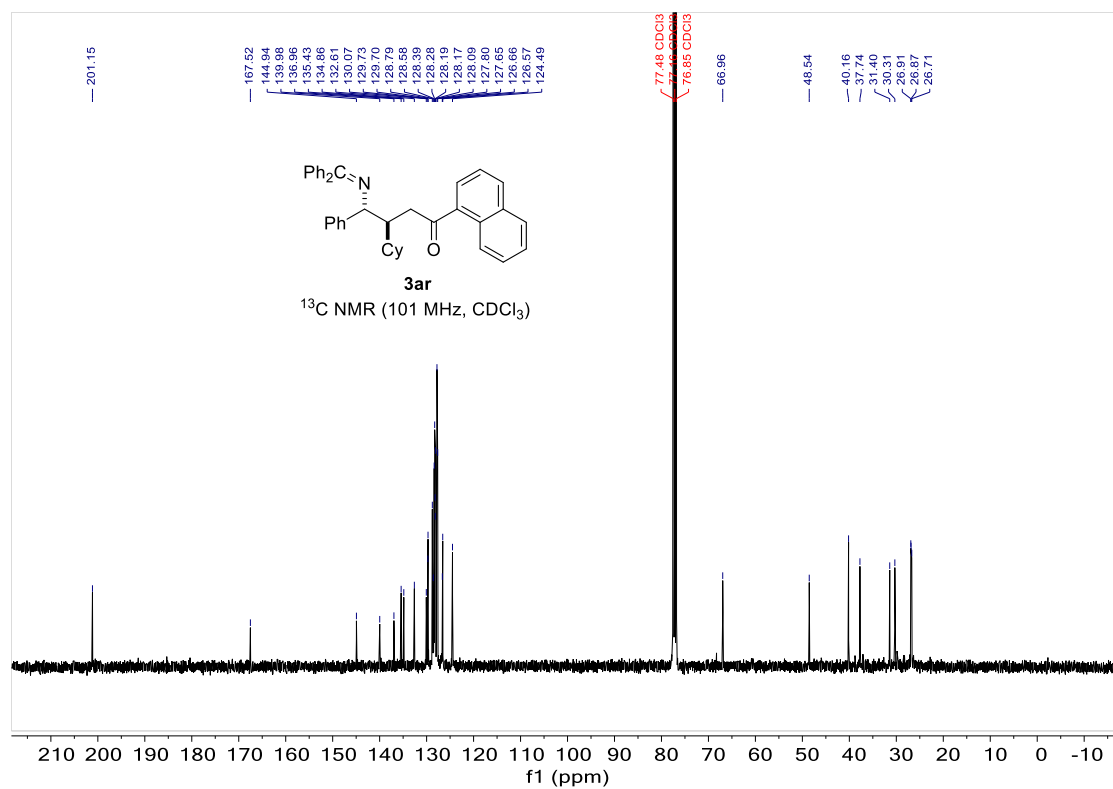



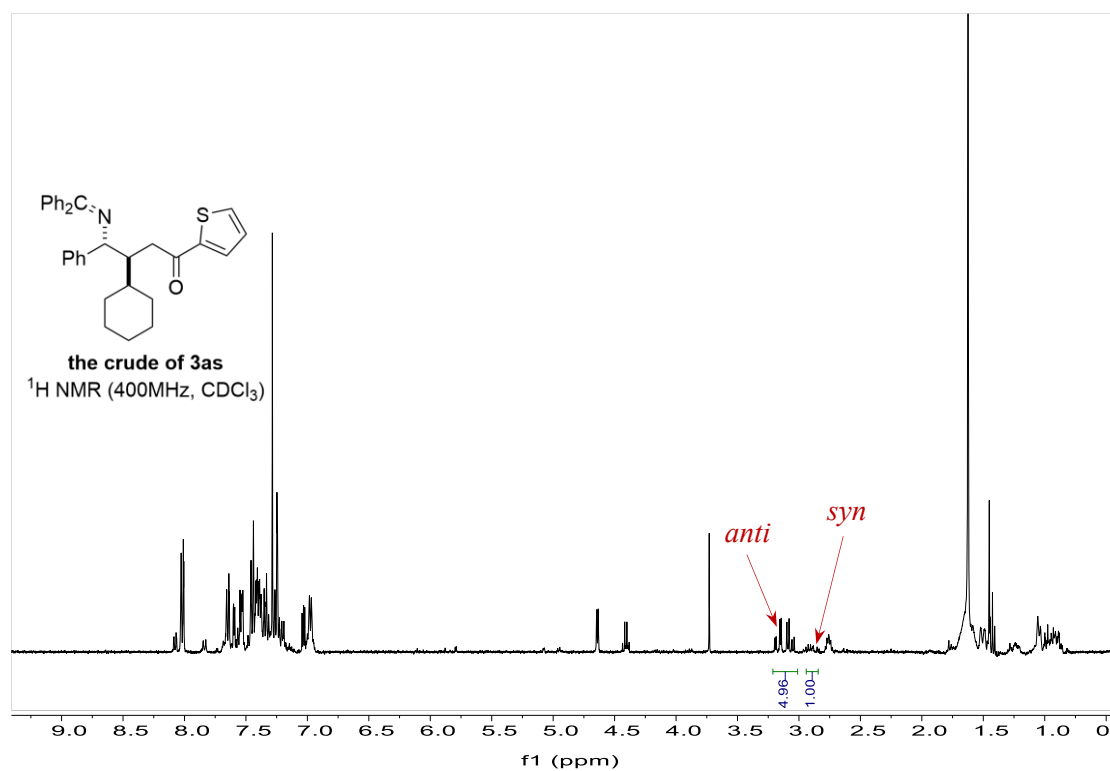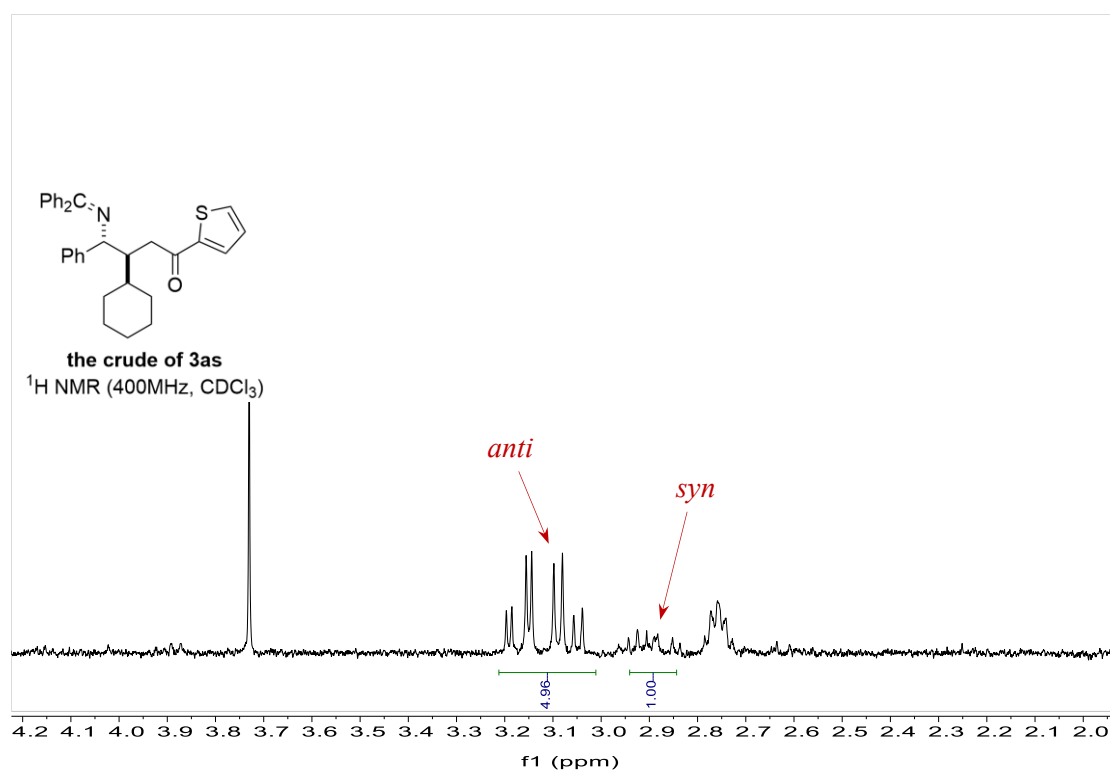

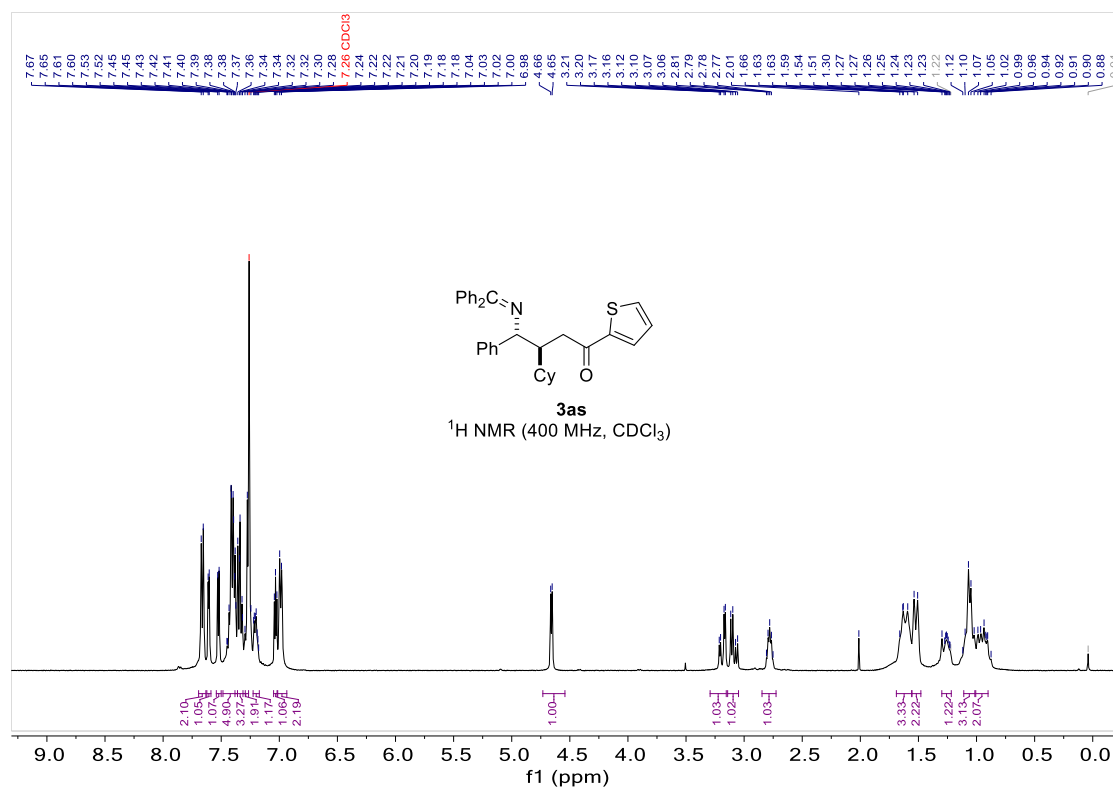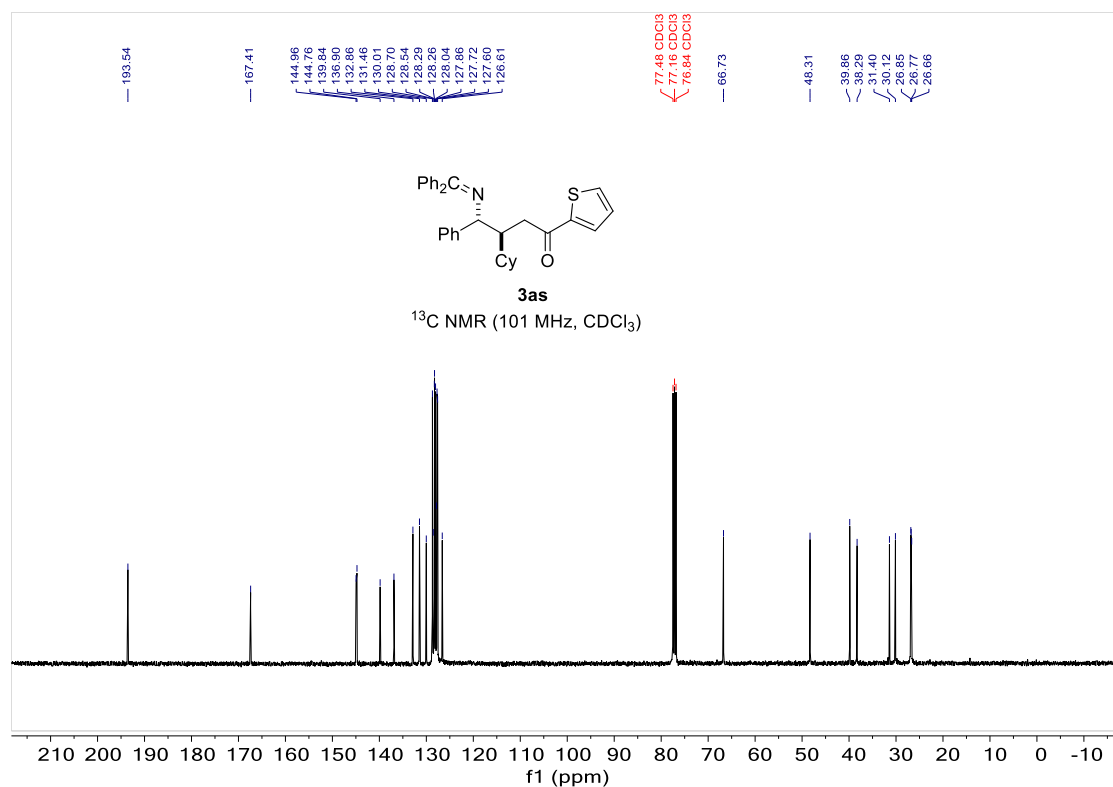

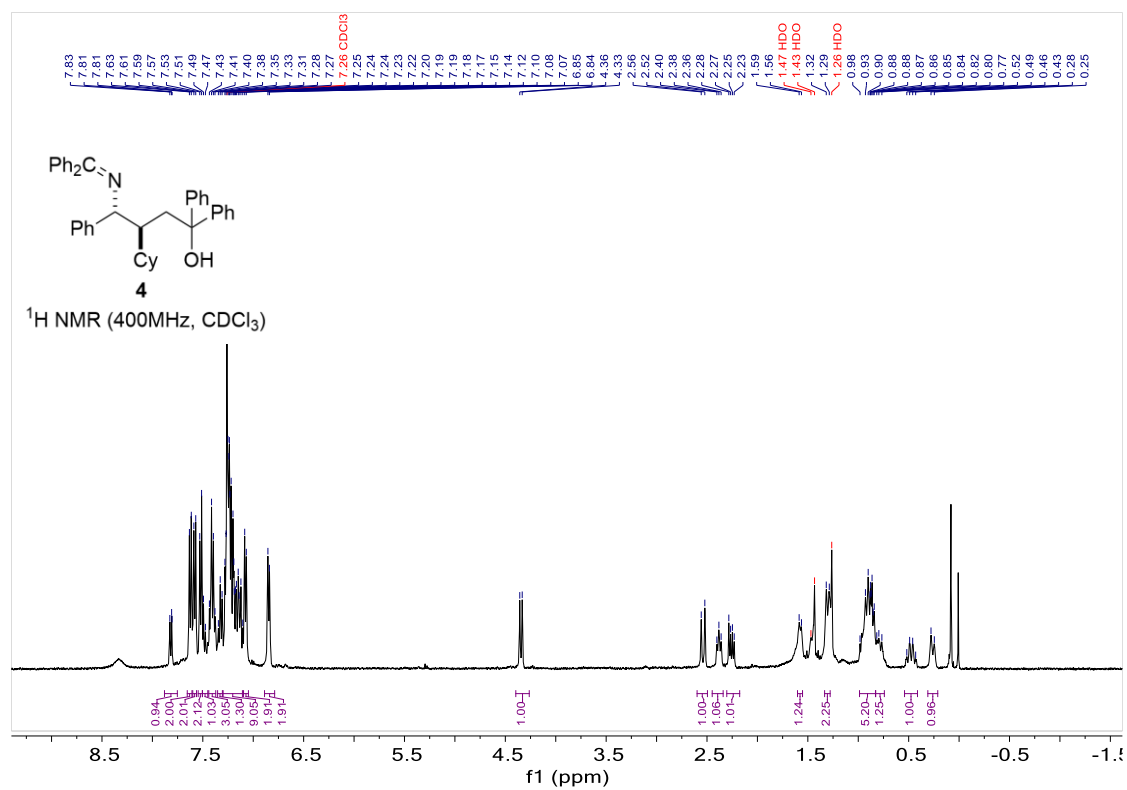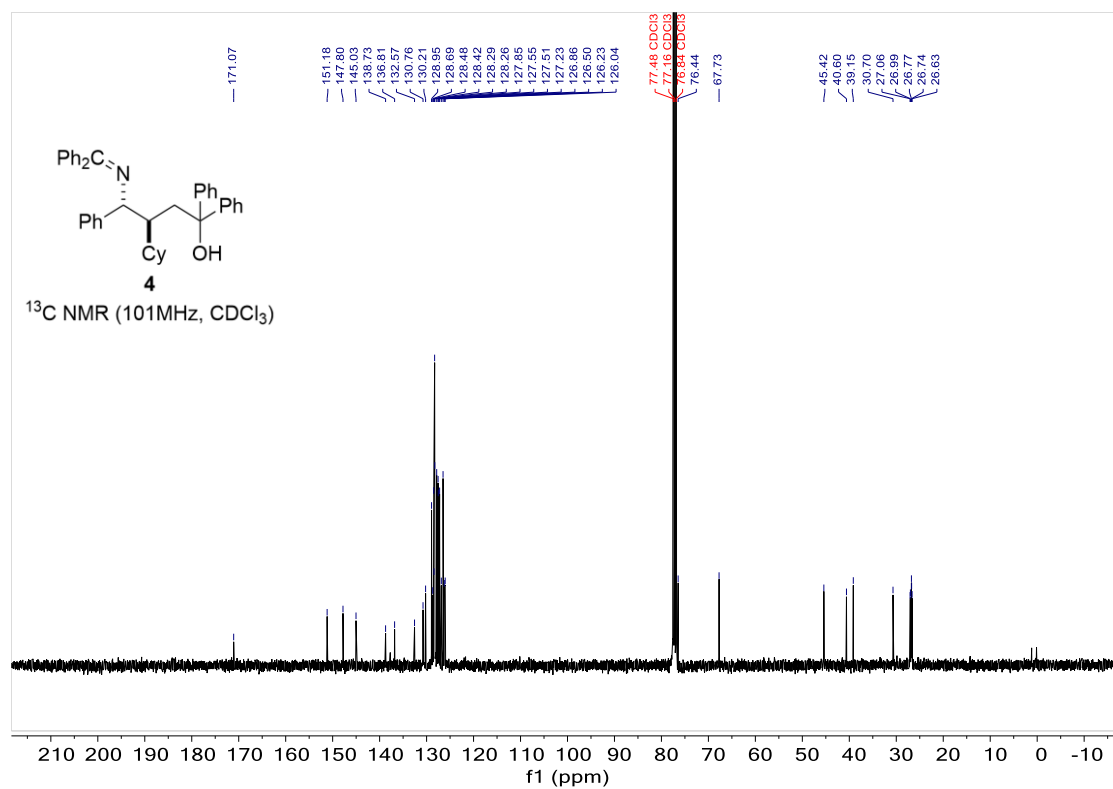

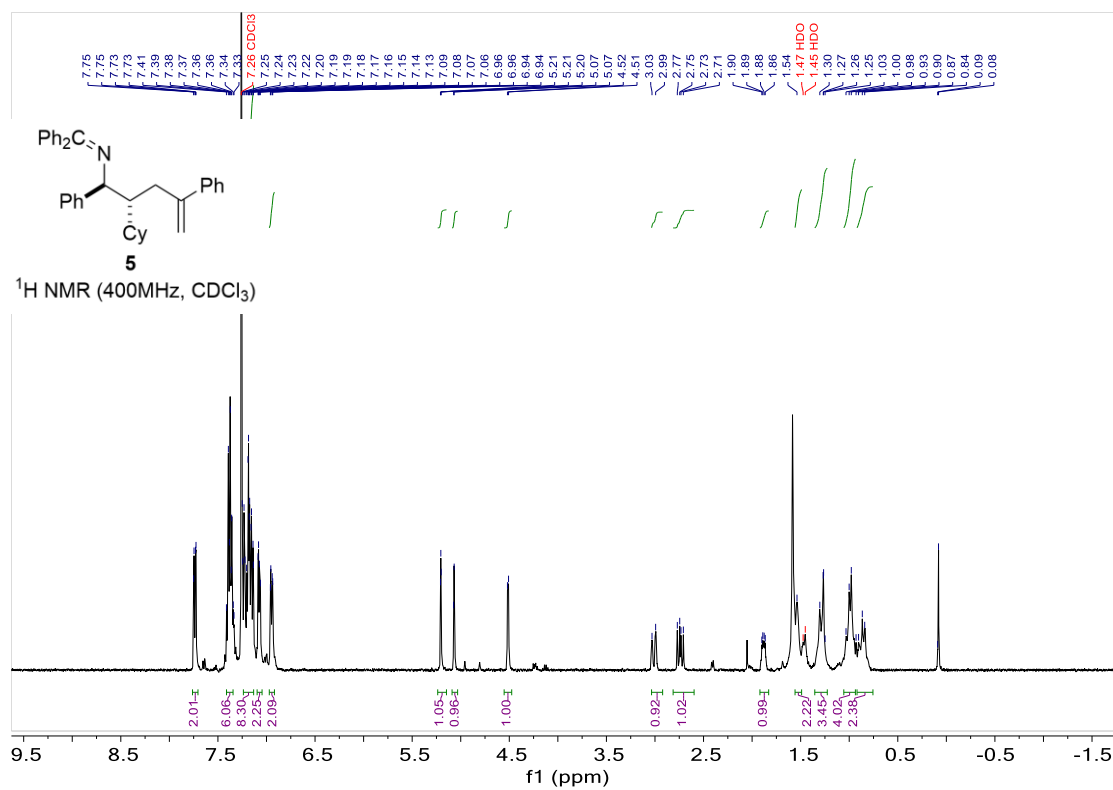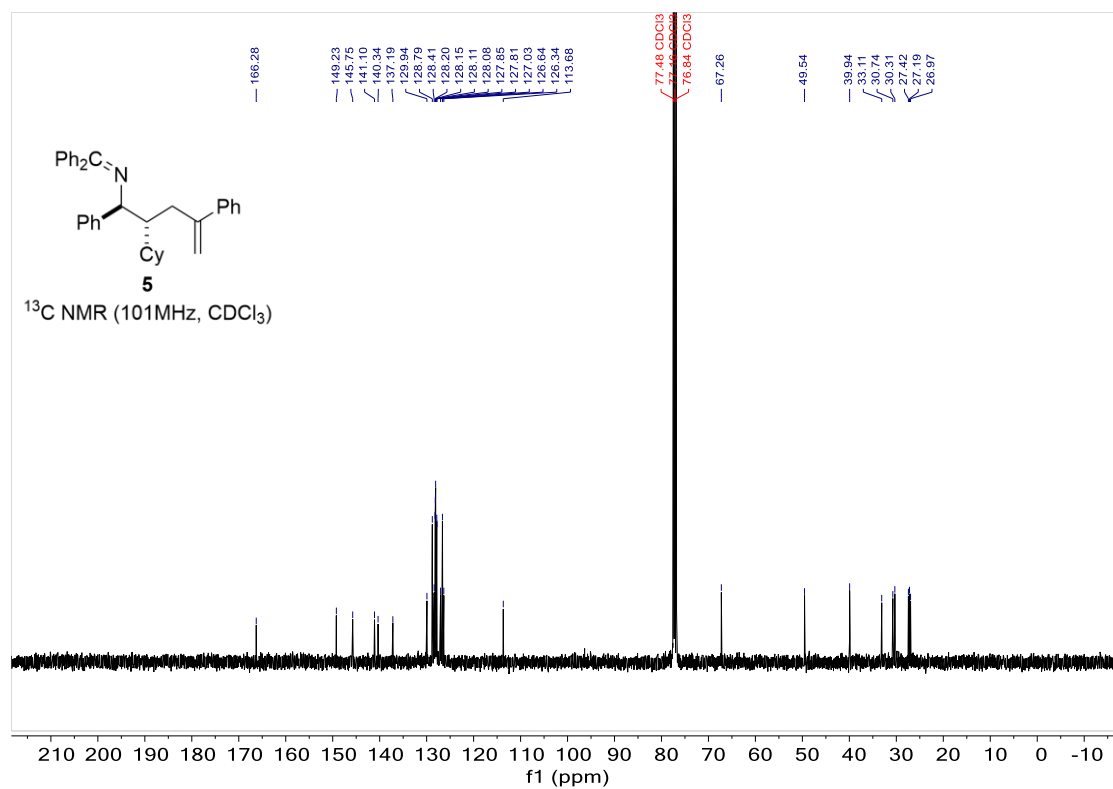

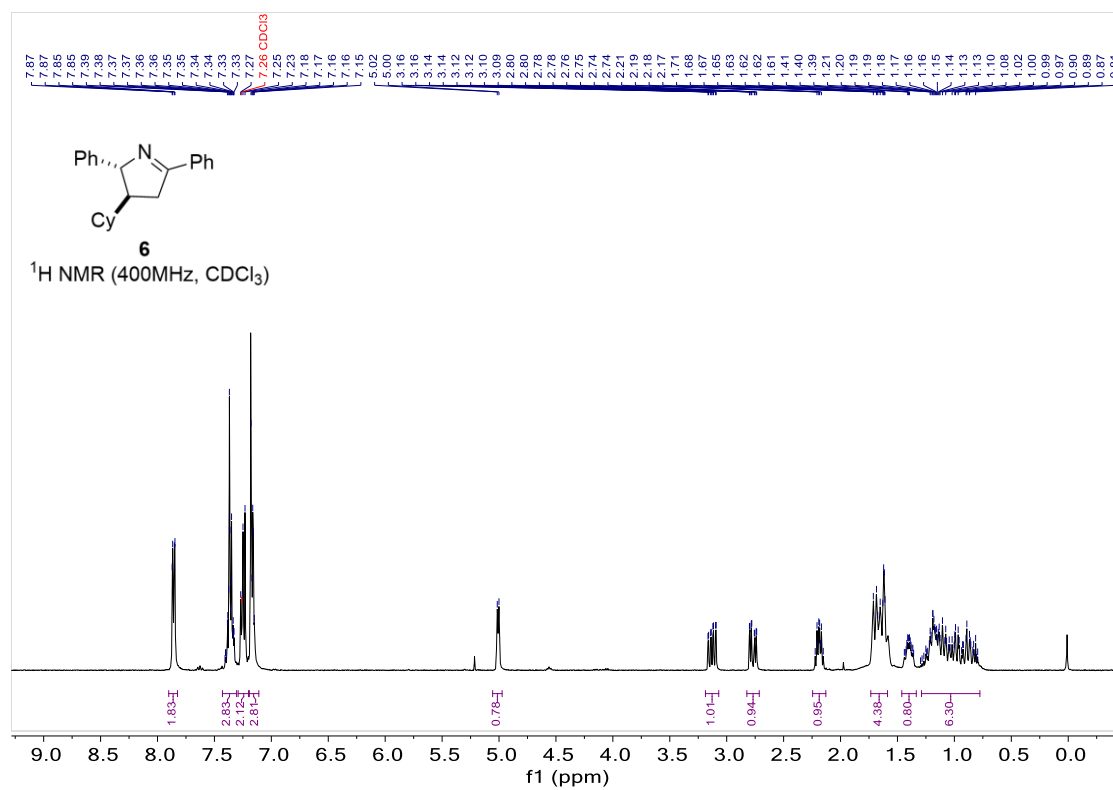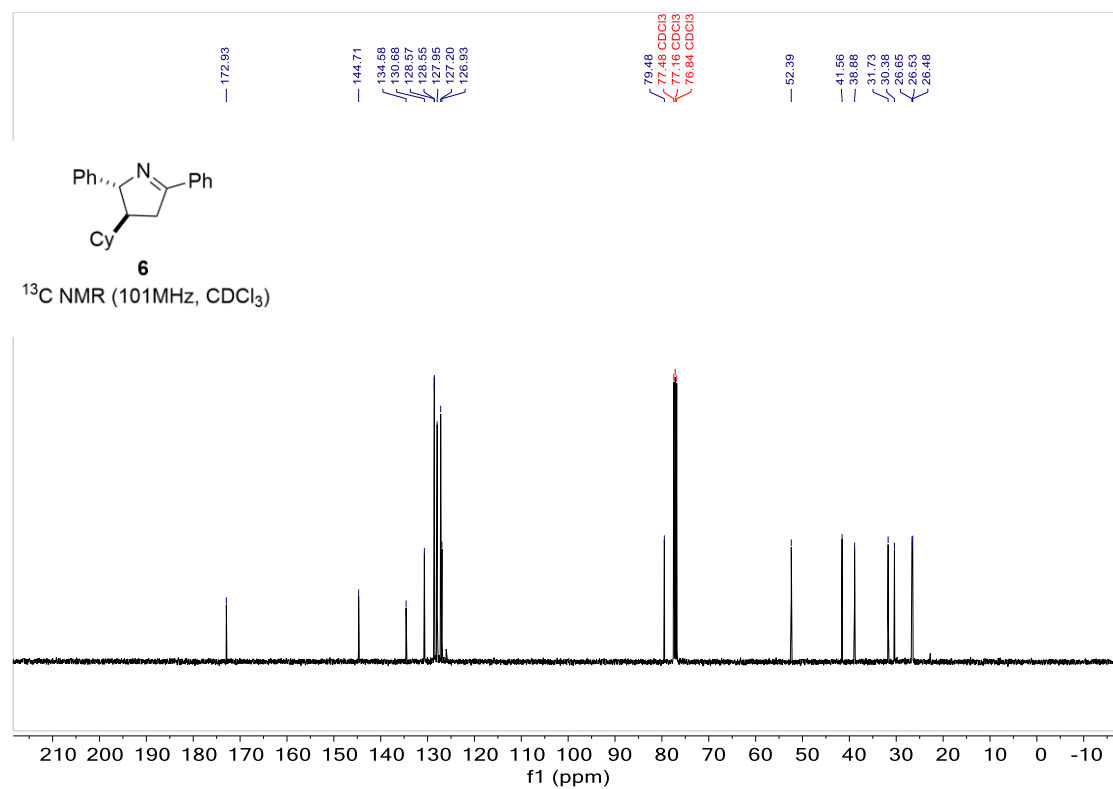

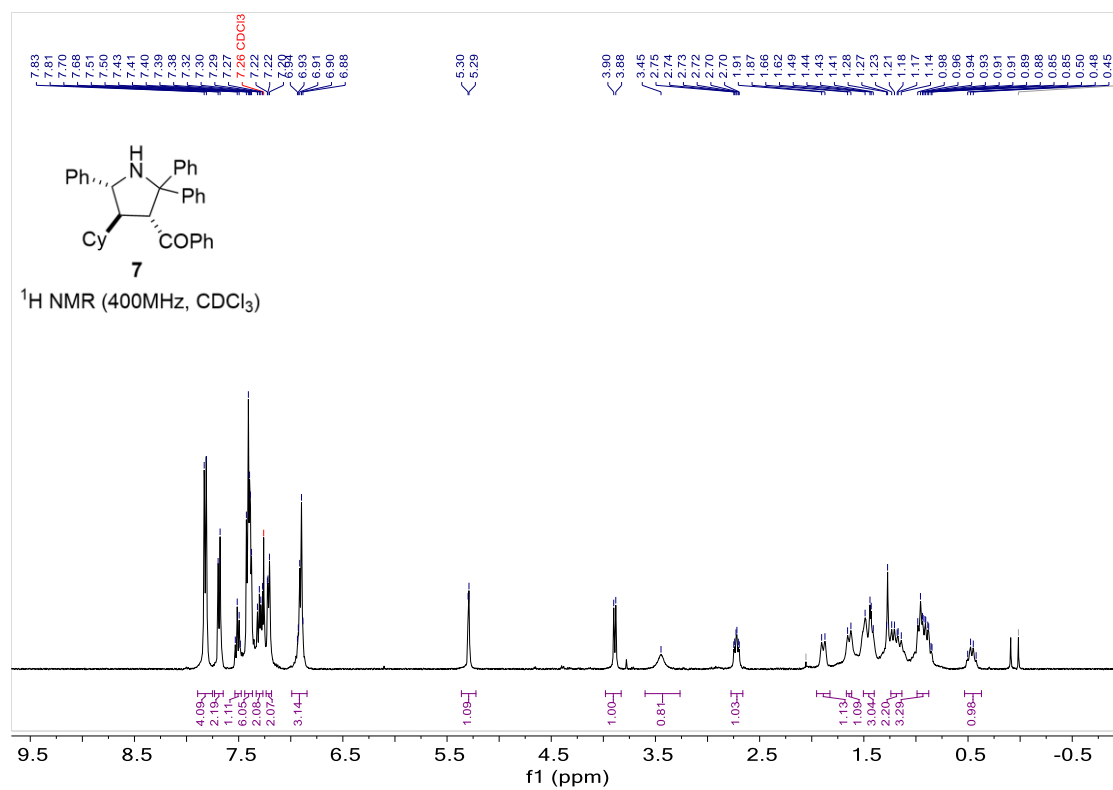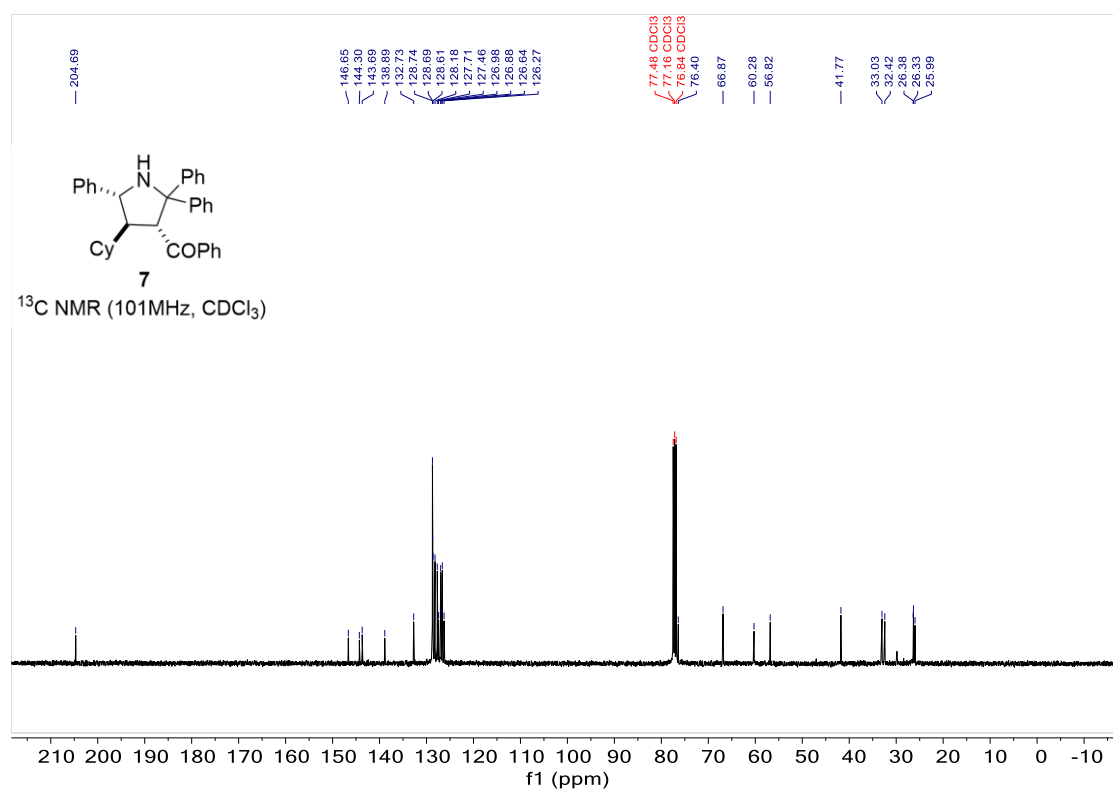

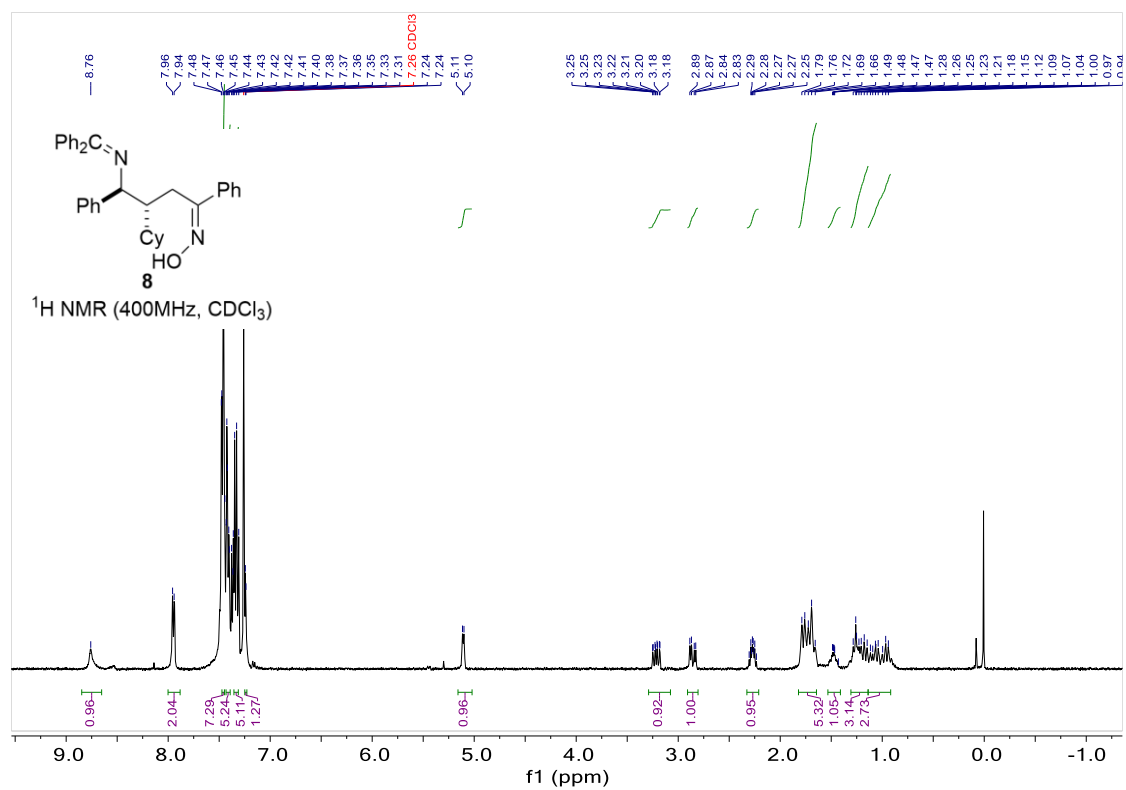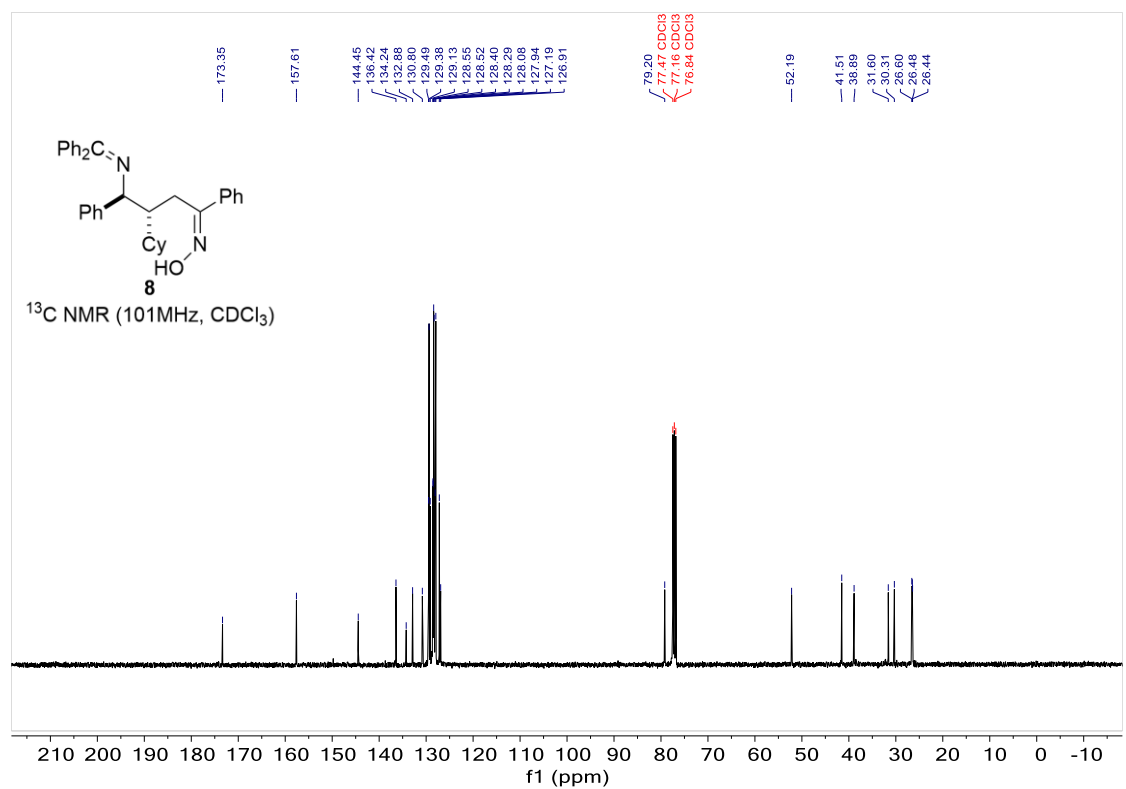

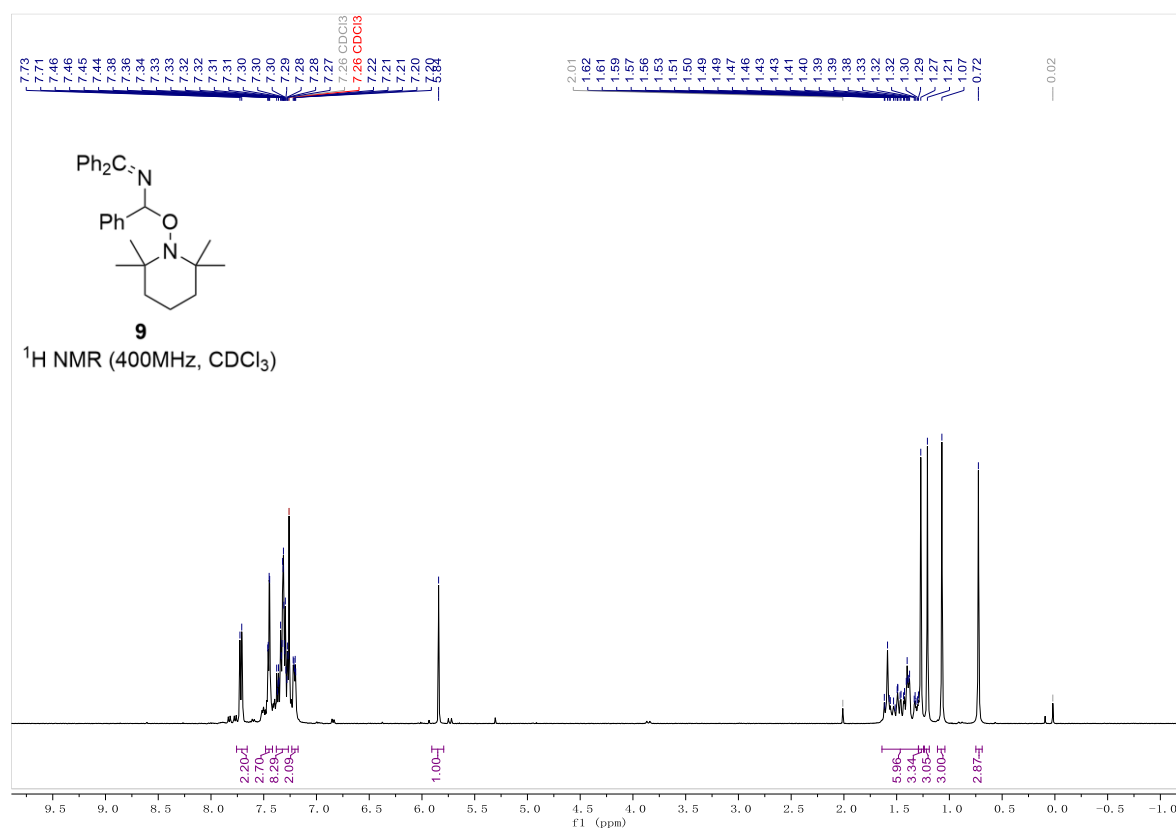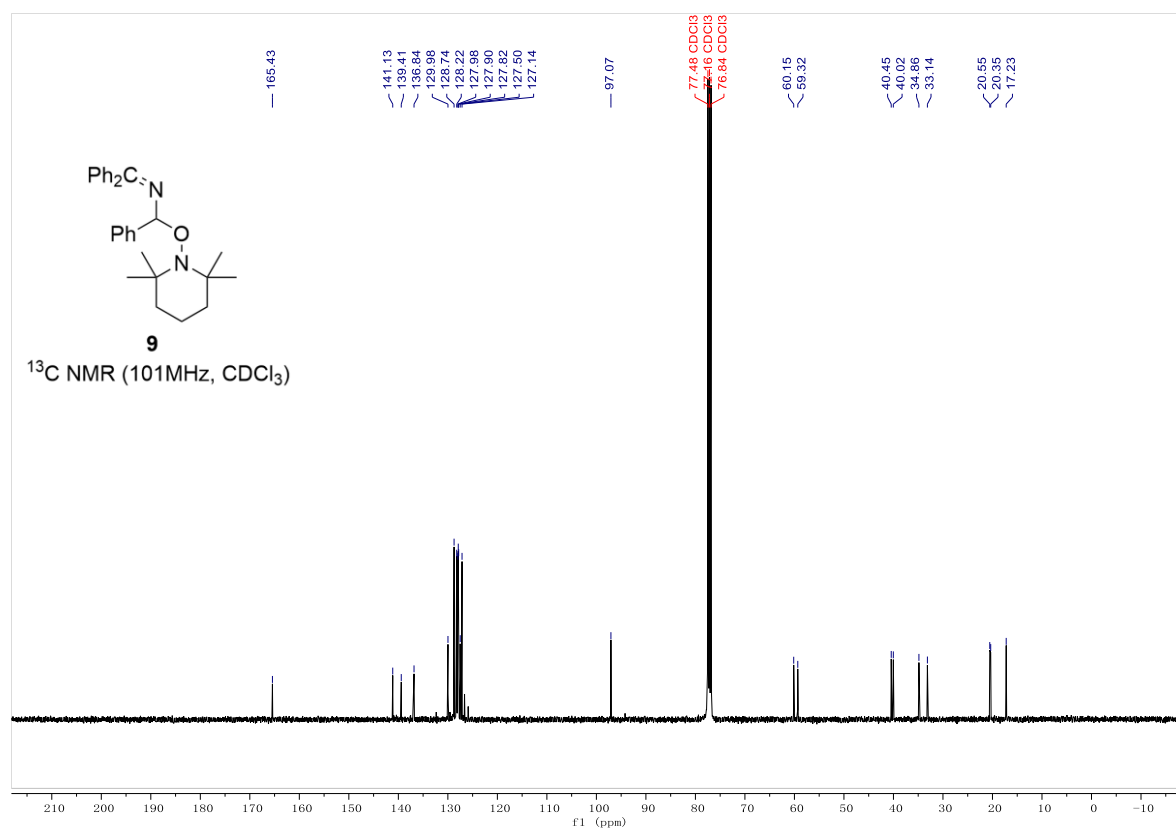



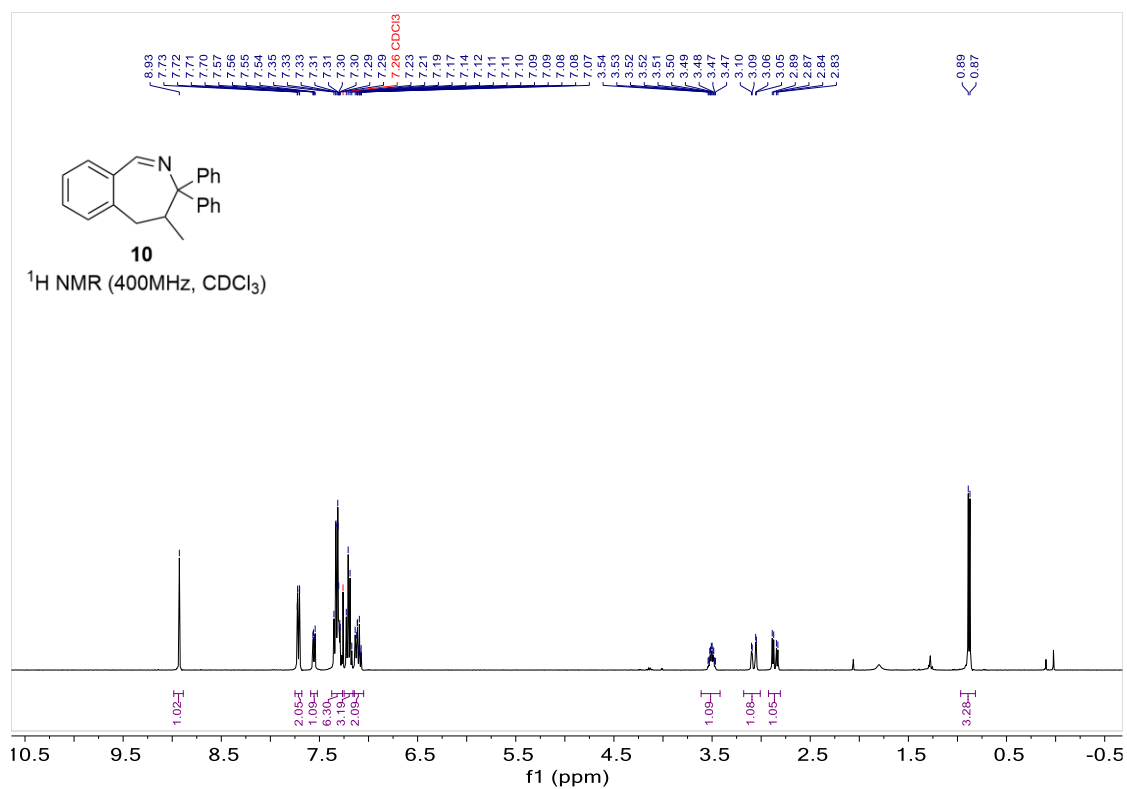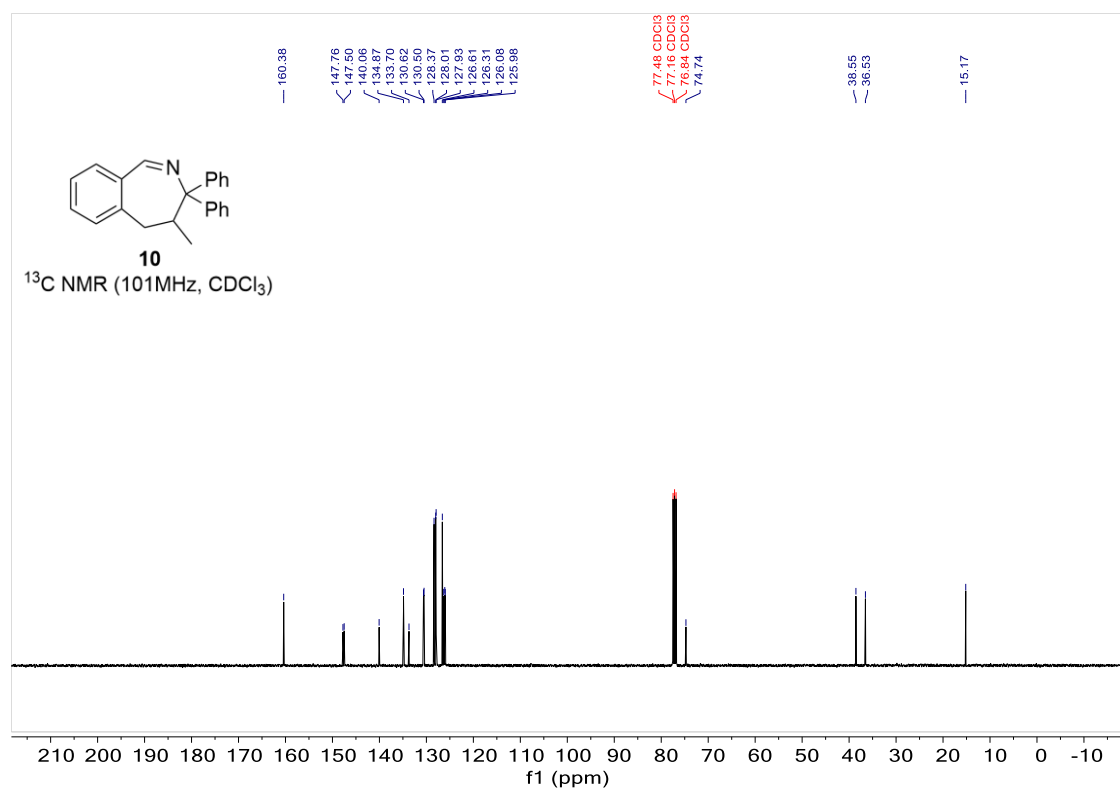

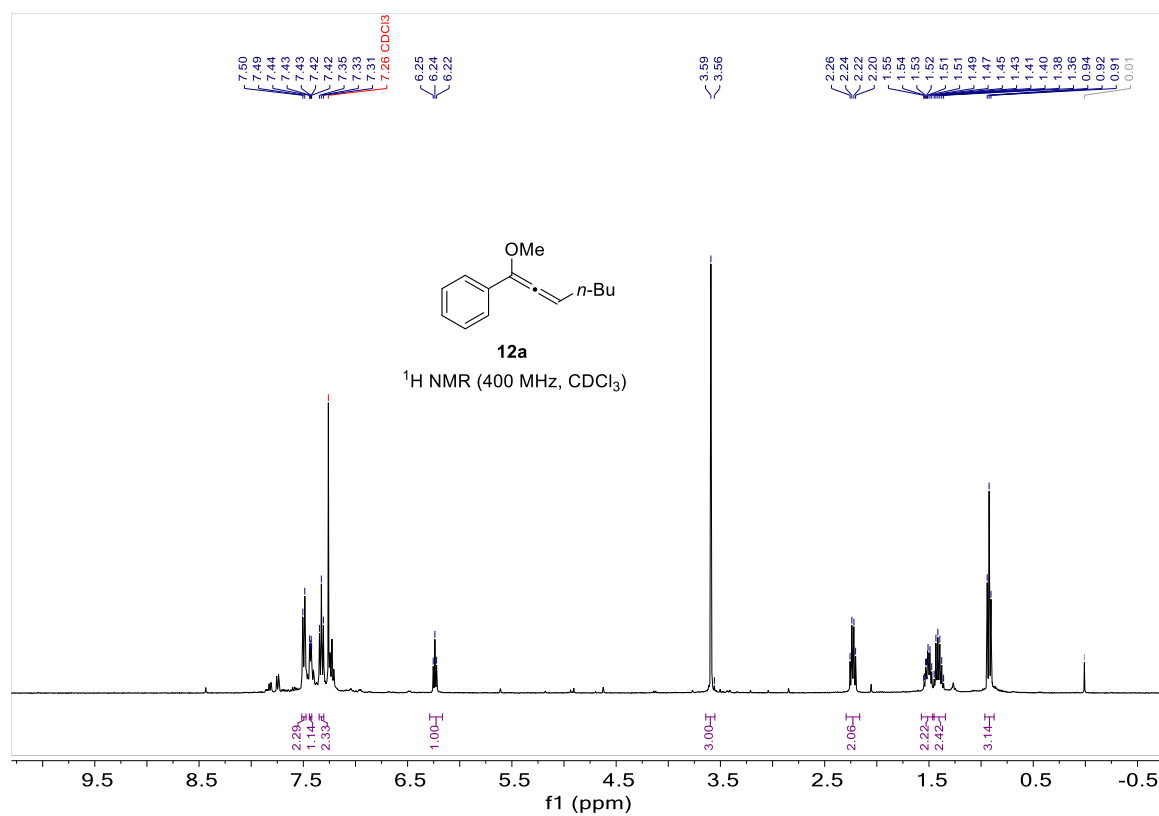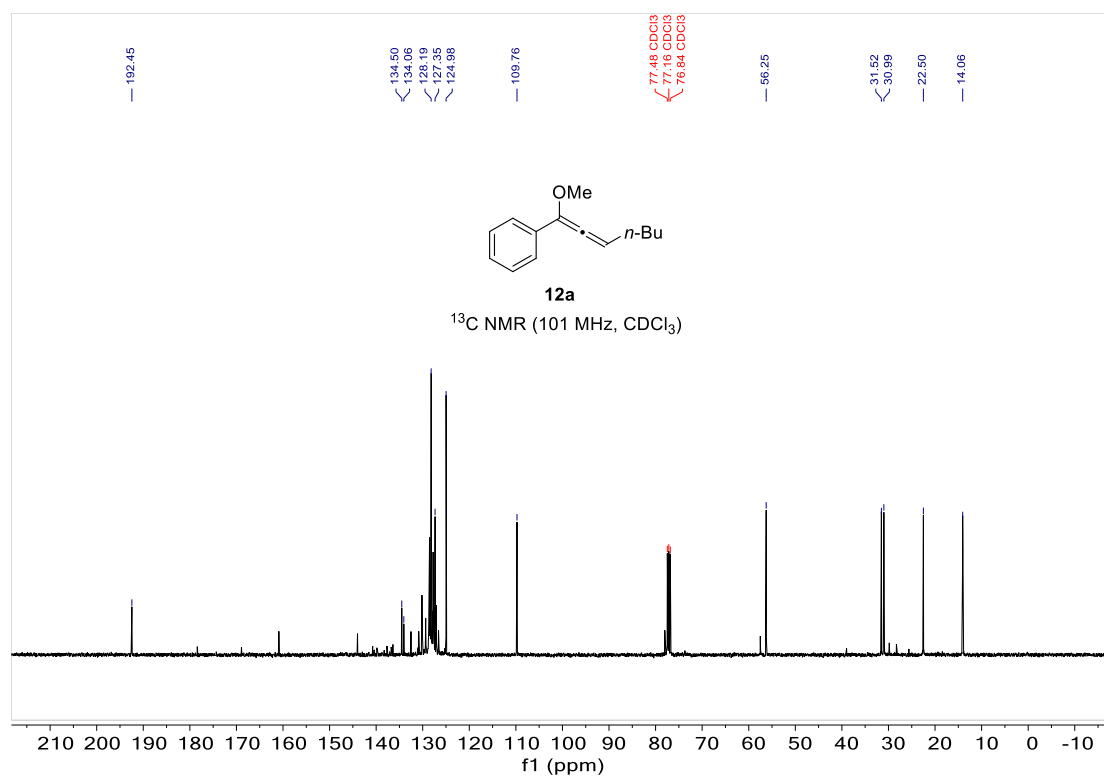

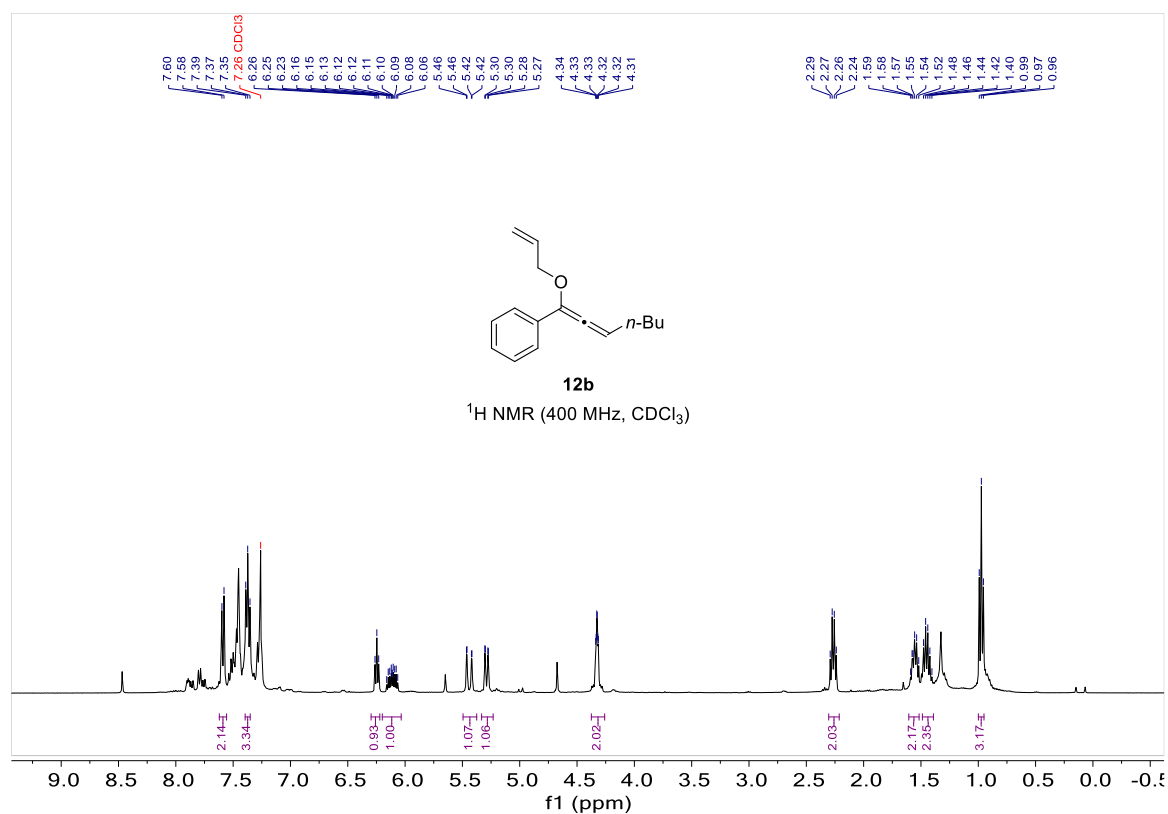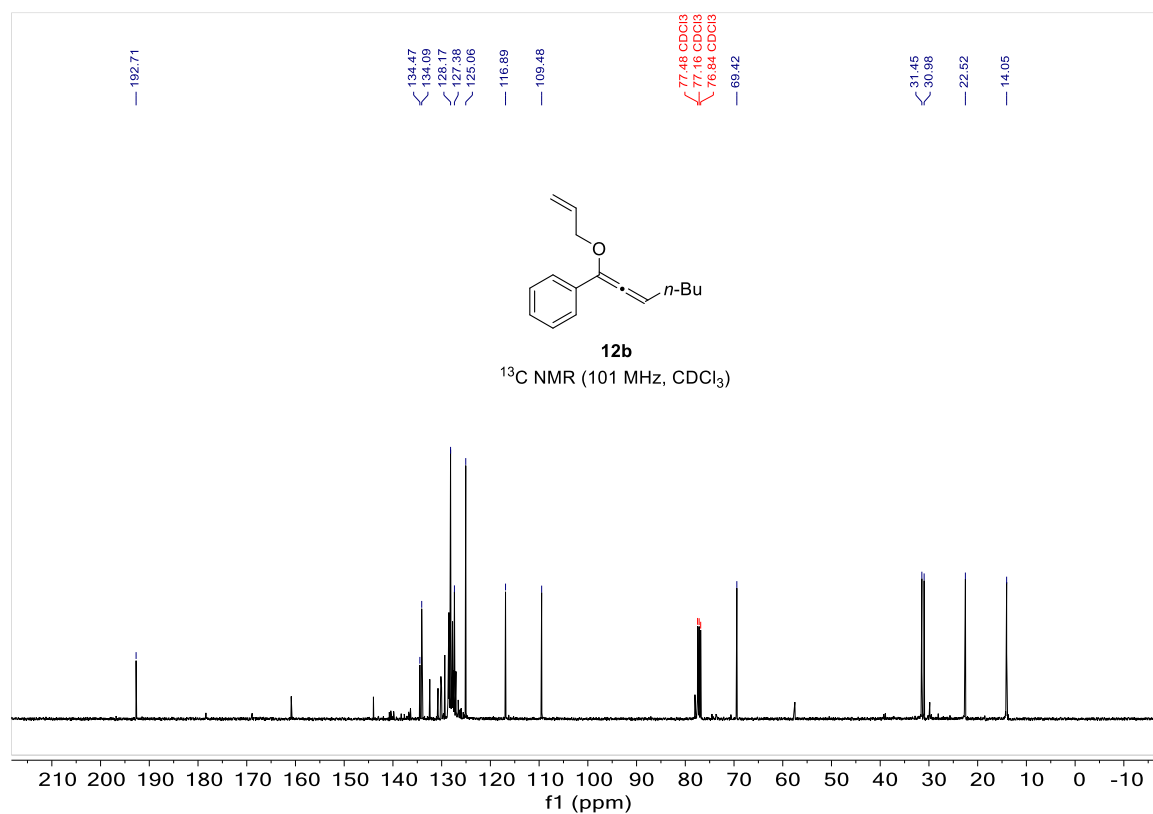

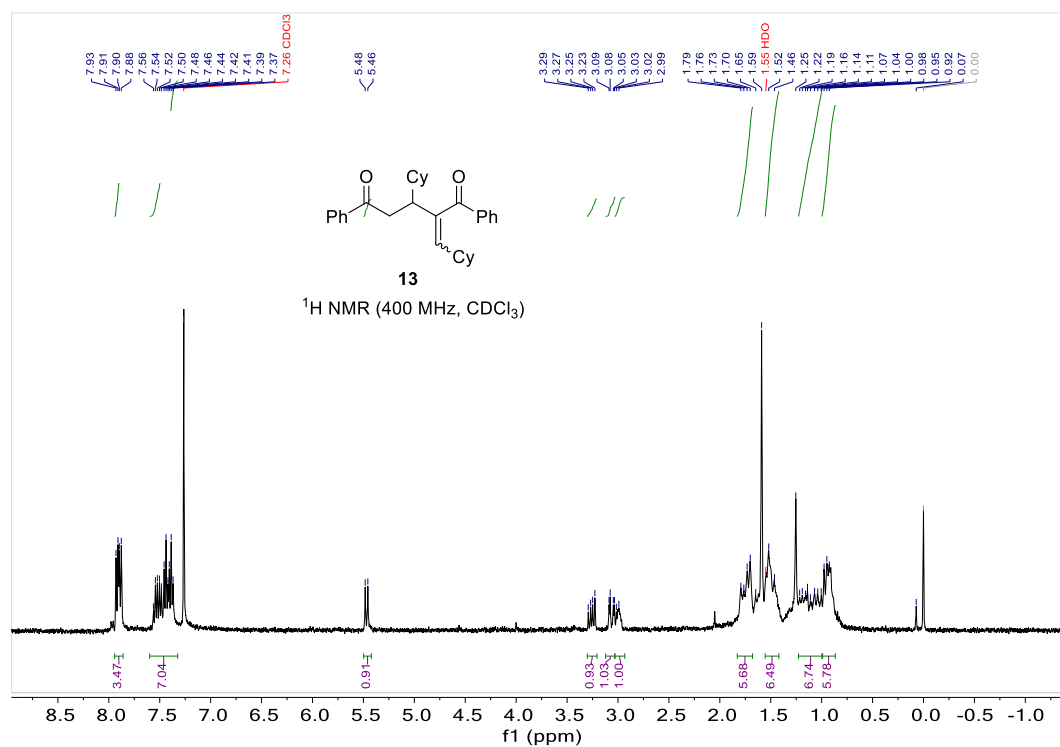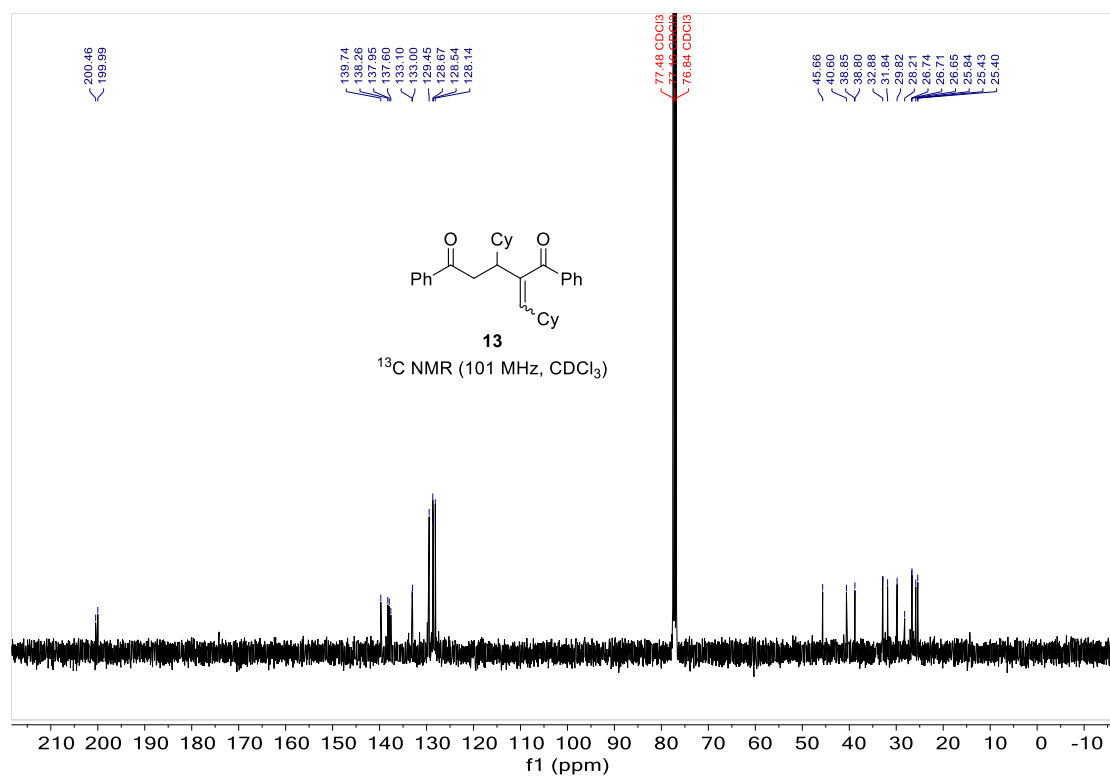

## 6. References

- [1] P. Xu, W.-W. Liu, T.-Z. Hao, Y.-Q. Liu, H.-X. Jiang, J. Xu, J.-Y. Li, L. Yin, S.-L. Zhu, X. Zhu, *J. Org. Chem.* **2024**, *89*, 9750-9754.
- [2] R. Wang, M. Ma, X. Gong, G. B. Panetti, X. Fan, P. J. Walsh, *Org. Lett.* **2018**, *20*, 2433-2436.
- [3] M. J. McGill, A. X. Wayment, C. R. Schull, K. A. Scheidt, *Adv. Synth. Catal.* **2024**, *367*, e202401207.
- [4] M. Dai, Z. Sun, L. A. Chen, *Angew. Chem. Int. Ed.* **2022**, *61*, e202203835.
- [5] H. Bao, X. Zhu, J. Xi, *Synthesis* **2024**, *56*, 1393-1400.
- [6] N. Okamoto, T. Sueda, H. Minami, Y. Miwa, and R. Yanada, *Org. Lett.* **2015**, *17*, 1336-1339.
- [7] J. Wang, G. Deng, C. Liu, Z. Chen, K. Yu, W. Chen, H. Zhang, X. Yang, *Adv. Synth. Catal.* **2020**, *362*, 2268.
- [8] Y.-C. Hsu, J.-H. Lai, R.-S. Liu, *Chem. Commun.* **2017**, *53*, 6009-6012.
